# Supplementary material for: Cannibalism Affects Core Metabolic Processes in Helicoverpa armigera Larvae—A 2D NMR Metabolomics Study
Source: Int J Mol Sci. 2016 Sep 2;17(9):1470. doi: 10.3390/ijms17091470 (PMC5037748; doi:10.3390/ijms17091470)
Supplement: Supplementary file 1 [file ijms-17-01470-s001.zip]

Archive with 5 entries (4 files):
- ijms-131501-Supplementary Materials/
- ijms-131501-Supplementary Materials/ijms-131501-supplementary.pdf
- ijms-131501-Supplementary Materials/Table S1.xlsx
- ijms-131501-Supplementary Materials/table S2.xlsx
- ijms-131501-Supplementary Materials/Table S3.xlsx
