# Supplementary material for: Cannibalism Affects Core Metabolic Processes in Helicoverpa armigera Larvae—A 2D NMR Metabolomics Study
Source: Int J Mol Sci. 2016 Sep 2;17(9):1470. doi: 10.3390/ijms17091470 (PMC5037748; doi:10.3390/ijms17091470)
Supplement: Supplementary file 1 [file ijms-17-01470-s001.zip › ijms-131501-Supplementary Materials/Table S1.xlsx]

## Sheet: chemical shift
Table S1. List of candidate metabolites by matching of the 1H and 13C chemical shifts (obtained from HSQC spectra) using SpinAssign and confirmed by comparison with the databases HMDB and BRMB. Notice that as a consequence of spectral aliasing, some signals appear offset by 40 ppm. ROIs used to produce Figures 2–6 are highlighted in green.
	Chemical shift (ppm)						Chemical shift (ppm)
ROI No.	1H	13C	(aliased)	Annotation by SpinAssign		ROI No.	1H	13C	(aliased)	Annotation by SpinAssign
ROI.1	5.23058	94.8	(54.80)	D-Glucose		ROI.63	2.63246	31.52	(71.52)	L-Methionine
ROI.2	5.24426	62.93		Allantoate		ROI.64	2.27692	31.83	(71.83)	L-Valine
ROI.3	4.64266	98.63	(58.63)	D-Glucose		ROI.65	2.07181	31.76	(71.76)	L-Proline
ROI.4	3.74008	56.13		L-Leucine		ROI.66	1.90772	32.62	(72.62)	L-Lysine
ROI.5	3.7811	56.91		L-Ornithine		ROI.67	2.44106	33.55	(73.55)	2-Oxoglutarate
ROI.6	3.76741	57.07		L-Arginine						L-Glutamine
				L-Glutamate		ROI.68	2.34526	36.05	(76.05)	L-Glutamate
				L-Glutamine		ROI.69	1.9761	38.63	(78.63)	L-Isoleucine
				L-Lysine		ROI.70	1.73	42.62	(82.62)	L-Leucine
ROI.7	3.20678	56.6		Choline		ROI.71	5.20323	93.63	(53.63)	N-Acetyl-D-glucosamine
				Choline phosphate		ROI.72	3.99989	57.23		L-Histidine
ROI.8	3.84947	59.1		L-Serine		ROI.73	4.28714	73.01		Malate
ROI.9	4.16398	60.74		Choline phosphate		ROI.74	2.86499	37.23	(77.23)	L-Asparagine
ROI.10	4.12296	63.87		L-Proline		ROI.75	3.23416	43.17	(83.17)	L-Arginine
ROI.11	3.67171	62.23		L-Isoleucine						Ethanolamine phosphate
ROI.12	3.90417	63.4		D-Glucose		ROI.76	3.64431		(74.34)	-
				N-Acetyl-D-glucosamine		ROI.77	1.4428	24.1	(64.10)	L-Lysine
				Uridine		ROI.78	5.381		(62.62)	-
ROI.13	3.8358	63.24		D-Glucose		ROI.79	1.90772	25.98	(65.98)	Acetate
				N-Acetyl-D-glucosamine		ROI.80	3.5936		(77.31)	-
ROI.14	3.76743	63.24		D-Glucose		ROI.81	3.66003		(79.61)	-
				N-Acetyl-D-glucosamine		ROI.82	2.75554		(79.26)	-
				Uridine		ROI.83	2.12654	32.38	(72.38)	L-Methionine
ROI.15	3.7264	63.4		D-Glucose		ROI.84	1.71628	26.76	(66.76)	L-Arginine
				N-Acetyl-D-glucosamine						L-Leucine
ROI.16	3.58973	63.09		L-Threonine		ROI.85	2.3453	31.76	(71.76)	L-Proline
				L-Valine		ROI.86	2.11289	29.65	(69.65)	L-Glutamate
ROI.17	4.24603	68.63		L-Threonine		ROI.87	1.51116	24.18	(64.18)	L-Lysine
ROI.18	6.88518	118.55	(78.55)	L-Tyrosine		ROI.88	3.58971		(74.49)	-
ROI.19	3.87	56.78		L-Methionine		ROI.89	1.98982		(73.79)	-
				N-Acetyl-D-glucosamine		ROI.90	1.82567		(73.71)	-
ROI.20	4.05462	58.32		Choline		ROI.91	2.05133	24.73	(64.73)	N-Acetyl-D-glucosamine
ROI.21	3.82213	60.35		Ethanolamine		ROI.92	1.64794	26.53	(66.53)	L-Arginine
ROI.22	3.96573	62.85		L-Serine		ROI.93	5.92117	91.91	(51.91)	Uridine
				Ethanolamine phosphate		ROI.94	5.88701	105.04	(65.04)	Uridine
ROI.23	3.78104		(64.26)	-		ROI.95	3.99992	58.71		L-Phenylalanine
ROI.24	3.82213	65.27		D-Glucono-1,5-lactone		ROI.96	3.94525	58.79		L-Tyrosine
ROI.25	3.64437	65.19		D-Glucono-1,5-lactone		ROI.97	4.21874	72.07		Uridine
				Glycerol		ROI.98	4.34181	76.45		Uridine
				Ethylene glycol		ROI.99	3.05642	38.24	(78.24)	L-Tyrosine
ROI.26	3.54865	65.19		Glycerol		ROI.100	1.74363	25.43	(65.43)	L-Ornithine
ROI.27	3.71273		(66.45)	-		ROI.101	3.67171	59.41		N-Acetyl-D-glucosamine
ROI.28	3.83574	67.62		sn-Glycerol 3-phosphate		ROI.102	3.48027	72.77		N-Acetyl-D-glucosamine
ROI.29	3.79478	67.62		sn-Glycerol 3-phosphate		ROI.103	3.50765	73.71		myo-Inositol
ROI.30	3.58967	69.18		Choline phosphate		ROI.104	3.53499	76.6		N-Acetyl-D-glucosamine
ROI.31	3.52129	70.12		Choline		ROI.105	2.39999	36.76	(76.76)	Succinate
ROI.32	3.39822	72.3		D-Glucose		ROI.106	3.17948	30.27	(70.27)	L-Histidine
ROI.33	4.04091	73.71		D-Glucono-1,5-lactone		ROI.107	4.01357		(74.73)	-
ROI.34	3.8358	74.18		D-Glucose		ROI.108	3.61701	75.08		myo-Inositol
				N-Acetyl-D-glucosamine		ROI.109	2.25641		(76.21)	-
ROI.35	3.76743	73.87		D-Glucono-1,5-lactone		ROI.110	4.09561		(71.84)	-
ROI.36	3.53496	74.18		D-Glucose		ROI.111	3.8475		(75.46)	-
ROI.37	3.7811	74.73		Glycerol		ROI.112	3.71272		(77.93)	-
ROI.38	3.75381	75.27		D-Glucono-1,5-lactone		ROI.113	3.20678		(56.05)	-
ROI.39	3.71273	75.51		D-Glucose		ROI.114	3.6075	65.03		sn-Glycerol 3-phosphate
ROI.40	4.12297	76.84		D-Glucono-1,5-lactone		ROI.115	3.54864		(64.73)	-
ROI.41	3.23413	76.84		D-Glucose		ROI.116	3.50762		(72.07)	-
ROI.42	3.48036	78.48		D-Glucose		ROI.117	3.8632	74.02		sn-Glycerol 3-phosphate
ROI.43	3.04269	41.6	(81.60)	L-Ornithine		ROI.118	3.46659	78.55		D-Glucose
ROI.44	3.54864	44.1	(84.10)	Glycine						N-Acetyl-D-glucosamine
ROI.45	4.20501	86.91		Uridine		ROI.119	3.0291	41.68	(81.68)	L-Lysine
ROI.46	3.40201	48.79	(88.79)	L-Proline						Putrescine
ROI.47	3.32985	48.79	(88.79)	L-Proline		ROI.120	2.09914		(69.33)	-
ROI.48	0.93684	13.87	(53.87)	L-Isoleucine		ROI.121	1.68893	42.54	(82.54)	L-Leucine
ROI.49	1.00521	17.46	(57.46)	L-Isoleucine		ROI.122	2.94017	37.23	(77.23)	L-Asparagine
ROI.50	0.991537	19.34	(59.34)	L-Valine		ROI.123	1.47014	27.23	(67.23)	L-Isoleucine
ROI.51	1.03257	20.66	(60.66)	L-Valine		ROI.124	3.01537	38.55	(78.55)	2-Oxoglutarate
ROI.52	1.3334	22.15	(62.15)	L-Threonine		ROI.125	3.12476	39.1	(79.10)	L-Phenylalanine
ROI.53	0.950514	23.55	(63.55)	L-Leucine		ROI.126	2.19488	32.3	(72.30)	L-Methionine
ROI.54	0.964188	24.8	(64.80)	L-Leucine		ROI.127	4.49899		(74.61)	-
ROI.55	1.82567	25.43	(65.43)	L-Ornithine		ROI.128	6.77581		(60.82)	-
ROI.56	2.00344	26.52	(66.52)	L-Proline		ROI.129	7.03562		(75.51)	-
ROI.57	1.77097	26.6	(66.60)	Putrescine		ROI.130	3.13836	43.87	(83.87)	Ethanolamine
ROI.58	1.26503	27.15	(67.15)	L-Isoleucine		ROI.131	1.68888		(84.80)	-
ROI.59	2.14018	28.94	(68.94)	L-Glutamine		ROI.132	6.99452		(71.91)	-
ROI.60	2.0484	29.49	(69.49)	L-Glutamate		ROI.133	3.69	65.03		sn-Glycerol 3-phosphate
ROI.61	1.72994	29.18	(69.18)	L-Lysine		ROI.134	3.6075		(64.65)	-
ROI.62	1.92144	30.27	(70.27)	L-Arginine		ROI.135	3.649		(65.80)	-
				L-Ornithine
