# Supplementary material for: Cannibalism Affects Core Metabolic Processes in Helicoverpa armigera Larvae—A 2D NMR Metabolomics Study
Source: Int J Mol Sci. 2016 Sep 2;17(9):1470. doi: 10.3390/ijms17091470 (PMC5037748; doi:10.3390/ijms17091470)
Supplement: Supplementary file 1 [file ijms-17-01470-s001.zip › ijms-131501-Supplementary Materials/table S2.xlsx]

## Sheet: area intensity
Samples	ROI.1	ROI.2	ROI.3	ROI.4	ROI.5	ROI.6	ROI.7	ROI.8	ROI.9	ROI.10	ROI.11	ROI.12	ROI.13	ROI.14	ROI.15	ROI.16	ROI.17	ROI.18	ROI.19	ROI.20	ROI.21	ROI.22	ROI.23	ROI.24	ROI.25	ROI.26	ROI.27	ROI.28	ROI.29	ROI.30	ROI.31	ROI.32	ROI.33	ROI.34	ROI.35	ROI.36	ROI.37	ROI.38	ROI.39	ROI.40	ROI.41	ROI.42	ROI.43	ROI.44	ROI.45	ROI.46	ROI.47	ROI.48	ROI.49
cannibal_1	53.7404	0	0	174.157	252.593	286.515	515.177	55.1958	205.519	89.9441	86.2155	0	0	34.4643	41.1787	612.108	218.292	46.5314	0	31.6268	14.699	53.1396	0	41.892	949.749	955.98	0	0	0	520.928	515.336	148.353	0	0	0	102.863	160.774	9.90306	0	0	0	169.562	159.559	415.403	0	100.709	120.854	0	13.2216
cannibal_2	147.519	57.9951	27.1436	121.548	368.794	319.193	693.308	57.3399	186.901	131.238	127.68	53.6842	26.4833	81.5468	154.782	650.987	232.159	0	13.131	99.7373	64.445	80.6979	0	210.386	1252.25	946.05	0	17.3414	48.5439	496.872	916.977	194.764	13.9318	21.6462	137.42	173.01	233.304	174.17	83.1305	86.0599	16.7171	371.524	356.111	199.368	29.895	116.438	91.9362	0	18.471
cannibal_3	0	359.037	0	227.073	639.001	440.654	688.49	79.096	183.908	146.699	234.41	0	0	0	20.3236	952.824	381.712	0	83.4254	95.637	47.26	145.288	63.3101	51.3828	549.801	349.376	0	0	9.39332	508.637	829.104	0	0	0	48.8028	4.53513	55.7444	65.3002	0	0	0	0	472.455	463.921	36.9251	215.861	161.392	0	117.04
cannibal_4	0	182.867	0	290.329	792.518	464.629	597.457	63.5238	100.217	108.57	280.158	0	0	0	0	939.912	352.759	9.55297	163.141	40.5048	55.7887	119.337	116.353	0	694.745	500.606	0	93.2409	33.1384	303.143	708.398	0	0	0	0	0	168.268	22.6203	0	0	0	0	405.623	496.479	52.8089	111.573	117.927	9.69323	116.689
cannibal_5	59.3297	219.886	0	263.949	577.721	438.085	682.751	35.5041	139.474	140.244	230.987	32.6057	27.4098	68.0317	69.0878	938.141	342.194	63.0721	66.9534	77.8229	114.828	113.176	0	226.69	1292.82	1022.18	0	74.3146	18.3132	413.249	919.329	146.294	27.8115	0	133.087	86.4848	258.38	168.506	16.542	65.7868	0	159.06	453.104	391.582	0	204.281	147.749	0	112.664
cannibal_6	110.846	150.345	4.23562	384.853	734.263	646.955	870.038	127.913	225.686	213.16	337.665	120.17	0	74.8292	117.47	1256.34	446.111	262.533	176.28	124.767	95.1531	93.1206	0	205.492	1454.68	1115.4	0	23.5223	24.4638	589.288	907.303	200.193	8.33582	14.5701	113.49	156.052	333.106	159.121	30.5434	82.735	0	301.485	515.36	583.074	18.03	310.312	301.287	43.3809	173.351
cannibal_7	114.589	99.0757	32.6955	293.216	706.113	660.114	712.08	109.281	180.001	178.219	308.05	98.8946	89.0601	95.6024	91.3472	1197.34	455.735	250.877	75.7858	73.1626	57.9886	128.649	0	225.196	1232.54	860.072	0	70.872	56.3927	461.306	754.948	159.274	41.6867	0	169.751	117.825	193.751	239.562	22.9854	99.6177	0	247.412	554.579	447.635	32.659	260.884	229.136	29.841	135.07
cannibal_8	93.6014	152.59	8.75911	467.383	890.104	780.171	644.924	188.236	92.7838	244.355	425.63	44.6434	27.0819	55.6599	68.6345	1505.61	589.058	349.02	99.8609	101.034	152.29	141.279	24.7428	228.084	1711.62	1352.77	0	0	0	245.636	1031.55	166.392	26.7944	0	163.734	168.285	328.801	231.643	54.8372	106.225	0	186.878	567.891	723.084	14.4392	405.528	351.217	69.4837	155.938
cannibal_9	0	100.433	0	394.139	813.773	721.665	760.786	250.907	106.615	162.536	366.889	0	0	0	0	1065.77	396.618	25.9656	149.588	109	113.925	257.554	53.8854	26.9513	1038.98	858.703	0	53.7575	61.6445	329.803	906.428	0	0	8.32445	19.9392	17.2686	234.445	44.4336	0	0	0	0	518.486	922.473	44.4183	256.991	253.051	4.06191	166.809
cannibal_10	13.6002	324.337	18.0574	220.696	526.107	465.802	736.32	48.2923	65.9902	113.968	211.386	33.1452	27.2763	0	19.5776	945.618	349.057	78.7288	0	115.803	143.27	49.1037	43.3226	294.936	1482.87	920.669	0	14.1449	4.08274	203.297	954.053	52.2573	73.3033	0	297.109	98.6946	238.827	337.478	35.1243	163.51	0	98.9194	384.403	303.278	12.5191	169.432	153.327	9.13905	79.0549
cannibal_11	0	111.014	0	232.491	606.974	516.453	728.647	116.022	44.6906	168.263	256.458	0	0	0	0	1017.2	360.887	25.0167	8.1909	149.723	95.3921	122.922	0	176.769	1376.04	1104.65	0	82.7549	25.2159	219.106	989.786	0	13.2841	0	183.197	4.60241	291.219	215.618	0	101.029	0	0	497.246	517.505	45.5105	192.474	176.363	49.7839	112.696
cannibal_12	40.064	202.791	9.79632	409.783	710.328	664.729	813.153	129.314	85.3129	187.492	307.866	59.8009	0	98.2628	114.532	1269.51	470.021	276.375	135.22	145.259	141.481	179.539	22.4536	386.87	1522.34	838.802	0	104.057	33.0172	274.047	929.053	104.887	137.979	44.8517	400.302	119.599	197.934	427.646	36.885	237.095	0	162.12	488.527	469.863	19.8065	246.869	201.862	49.2297	126.111
cannibal_13	0	44.7042	0	298.206	934.678	655.593	722.449	204.234	111.609	148.739	316.21	0	0	26.2742	12.7079	1139.63	409.489	53.1509	129.549	137.652	87.9338	305.555	79.9516	330.309	1510.05	875.208	0	54.8961	35.2474	255.83	838.2	38.6989	97.3131	0	341.903	10.4757	215.013	420.313	31.217	212.011	0	30.7027	551.324	675.523	8.56993	246.863	249.813	8.58034	115.888
cannibal_14	195.065	27.5437	97.2107	476.261	761.806	687.353	541.913	193.445	34.432	232.356	496.939	152.172	101.676	188.204	280.964	1459.24	530.745	371.699	126.325	76.744	126.446	192.196	54.8815	368.534	1766.33	1267.8	0	0	0	94.3204	824.968	390.791	70.6978	61.3172	339.309	343.103	329.163	421.87	167.242	189.707	37.5551	476.332	470.54	1120.63	0	336.722	287.953	64.7207	227.414
cannibal_15	0	18.482	0	415.722	971.434	731.216	891.286	200.02	170.588	184.829	420.352	0	0	0	0	1385.19	521.43	62.1766	161.641	148.83	143.609	263.423	65.7918	247.918	1495.6	1203.09	0	95.7206	51.4633	478.884	987.046	0	9.3545	0	151.098	8.86352	364.52	137.366	4.91484	89.9572	0	0	545.631	837.136	57.0858	249.201	236.869	38.2275	165.675
herbivore_1	553.218	175.239	183.62	185.655	380.531	284.405	348.168	53.0476	180.891	190.155	148.508	263.867	274.25	312.459	481.015	726.399	306.352	27.7347	8.37583	8.30309	4.02003	34.5236	0	29.1578	1007.19	760.662	0	125.024	78.0696	435.232	502.242	1231.35	0	120.052	0	809.843	123.924	121.643	482.096	0	109.622	978.233	294.298	482.878	22.8406	179.583	204.304	0	112.228
herbivore_2	542.057	214.159	280.679	447.471	658.419	564.515	621.555	188.941	102.771	253.817	384.332	347.576	281.518	443.583	619.622	1340.47	434.397	215.954	161.233	92.986	105.129	212.846	92.1221	353.004	1932.03	1139.22	104.591	215.121	132.528	338.422	889.939	1020.92	79.7386	169.622	360.306	788.867	281.079	455.954	449.64	169.753	101.375	1089.84	571.808	914.453	41.0467	332.98	301.193	41.7612	206.564
herbivore_3	987.497	449.889	500.837	642.316	985.44	949.93	578.457	188.746	44.9974	216.446	552.013	714.24	477.037	699.734	1109.54	1813.2	619.643	357.759	146.455	76.3153	135.406	242.687	57.1002	217.426	1404.8	938.298	0	133.832	113.488	311.378	1007.77	1717.36	24.6713	294.378	195.493	1314.81	247.666	398.661	848.627	78.6539	202.424	1871.03	638.249	863.77	36.8458	341.281	279.136	59.0753	301.868
herbivore_4	532.656	254.317	271.313	341.929	788.573	630.026	700.93	179.517	109.731	317.732	309.966	500.299	329.943	456.672	645.581	1217.9	466.709	61.5778	124.623	119.795	82.188	226.133	57.7275	401.297	1976.01	1234.42	63.3402	268.899	136.044	343.659	891.291	917.181	30.8232	175.862	351.377	773.828	300.263	609.716	454.99	175.066	91.5711	1062.41	578.999	743.449	45.1558	381.67	262.071	63.8082	154.111
herbivore_5	1047.66	64.061	553.362	619.161	865.79	807.407	674.762	270.326	90.5156	458.028	446.061	936.907	664.164	885.245	1114.83	1786.92	711.18	228.826	162.674	169.343	73.0036	364.374	88.0252	675.881	2518.87	1629.99	48.3278	89.7725	70.9031	67.6712	1112.22	1897.91	194.186	320.162	492.955	1532.42	454.233	837.605	982.369	256.588	262.034	1939.57	558.84	1563.06	31.7676	582.046	541.12	129.141	238.054
herbivore_6	941.129	411.908	493.08	583.261	1114.95	1024.03	560.403	165.931	49.8817	251.53	432.336	666.919	413.22	666.02	1055.08	1647.84	580.841	357.039	157.465	158.377	89.4962	152.687	68.0322	255.286	1609.79	1181.21	0	234.079	179.491	174.104	1089.19	1630.49	27.4582	291.666	141.397	1204.22	298.827	325.171	807.007	55.4581	225.362	1825.03	728.112	746.515	78.4717	327.916	295.069	79.3735	245.254
herbivore_7	924.212	234.289	463.656	442.885	724.628	691.407	525.82	184.41	40.009	256.845	372.757	694.014	520.671	726.812	1083.4	1423.64	599.113	225.358	53.8179	68.0538	93.1882	208.017	62.3062	395.063	1794.66	1228.14	57.4433	188.654	134.745	202.778	879.778	1716.69	8.3937	260.806	289.042	1287	299.825	543.073	844.386	131.962	214.682	1823.72	660.097	896.737	51.4683	293.992	320.45	47.0802	221.335
herbivore_8	1285.83	249.156	648.723	873.47	1110.92	1305.64	699.883	289.114	34.3825	400.328	655.87	1039.48	681.675	989.247	1399.61	2378.13	886.704	842.341	192.652	171.587	197.246	333.017	97.8543	452.683	2576.65	2024.85	42.9647	0	0	68.5776	1340.04	2301.28	0	393.35	112.56	1893.44	613.769	389.867	1144.76	67.7882	301.084	2215.85	721.065	1438.41	99.4904	628.836	610.067	114.916	328.282
herbivore_9	652.681	221.042	334.572	734.32	805.986	850.093	520.876	268.616	59.1125	267.99	569.933	587.351	430.835	596.608	893.927	1851.01	682.555	321.74	106.231	91.9126	104.063	285.827	32.5536	556.955	2397.5	1444.16	88.431	117.633	106.073	89.2431	1017.32	1303.42	114.247	232.158	588.183	1040.56	363.167	807.639	644.079	279.575	175.128	1278.31	731.26	843.526	30.5611	353.421	285.262	37.2355	285.049
herbivore_10	445.982	263.667	186.385	456.838	618.748	606.918	484.034	151.77	0	207.298	377.74	243.542	220.416	389.102	556.23	1302.69	483.271	143.213	28.0173	54.5154	61.5236	159.976	37.9585	525.645	1879.68	1038.69	26.0456	105.875	121.4	86.1114	848.285	808.025	130.567	166.824	542.095	654.111	236.707	641.128	415.574	205.631	115.141	909.528	589.409	600.314	8.63884	290.015	232.798	28.9092	186.512
herbivore_11	682.373	573.721	363.664	668.92	979.006	1148.95	772.229	221.936	0	276.781	575.607	469.302	443.802	594.062	838.722	1948.7	720.156	447.091	197.222	171.67	129.037	233.81	73.8895	474.394	1735.51	936.248	0	113.48	68.0364	19.3344	1216.69	1196.98	50.9207	217.052	349.138	811.561	260.403	570.057	584.461	192.899	172.971	1343.06	727.703	898.818	60.4994	336.465	285.954	67.5212	265.167
herbivore_12	480.083	480.97	246.296	492.269	650.375	599.593	693.118	168.653	0	243.147	379.732	413.834	310.164	432.932	622.388	1300.81	457.505	110.526	70.714	145.799	72.9017	232.144	82.409	642.279	2064.53	1214.63	72.6187	160.044	114.112	75.0045	1044.49	828.096	160.15	196.569	581.2	681.627	293.535	759.693	418.904	270.292	124.989	917.913	699.195	682.419	41.2717	324.871	264.412	86.4434	147.909
herbivore_13	553.402	259.313	364.031	548.751	759.631	973.023	903.692	239.181	0	353.138	492.381	461.032	278.551	480.417	732.536	1809.18	750.334	304.61	133.535	177.433	182.416	265.039	91.6373	962.359	3150.23	1731.24	4.46022	210.483	97.7373	0	1291.13	1013.98	327.163	276.366	1110.41	769.54	462.727	1296.11	552.978	635.106	177.134	1097	631.852	653.109	8.70243	488.502	422.627	47.373	272.682
herbivore_14	1062.33	197.034	584.682	779.888	1097.62	1214.39	823.427	269.298	20.5674	371.29	708.426	800.218	619.324	840.477	1330.89	2212.32	834.322	470.464	220.343	187.527	149.269	316.664	68.8086	503.886	2574.7	1843.85	0	111.572	78.0028	59.8203	1359	1970.31	114.128	405.687	433.171	1457.34	472.456	660.214	965.229	242.675	295.466	2026.83	715.875	984.506	41.8534	545.003	490.522	141.165	294.881
herbivore_15	464.711	289.65	242.731	428.245	760.795	746.287	640.74	178.927	8.83839	238.132	403.284	408.352	286.03	457.322	662.707	1380.85	581.244	134.311	125.625	105.049	127.775	207.512	70.7348	730.527	2453.09	1331.02	69.2182	207.517	145.94	116.249	992.585	894.777	217.343	230.959	768.523	741.526	326.196	949.412	494.988	374.312	137.349	963.434	795.034	743.974	40.7776	298.703	322.942	49.9238	283.354
[truncated: 86 more columns]

## Sheet: ver1
	Cannibal																Herbivore
ROI No.	1	2	3	4	5	6	7	8	9	10	11	12	13	14	15		1	2	3	4	5	6	7	8	9	10	11	12	13	14	15
ROI.1	53.7404	147.519	0	0	59.3297	110.846	114.589	93.6014	0	13.6002	0	40.064	0	195.065	0		553.218	542.057	987.497	532.656	1047.66	941.129	924.212	1285.83	652.681	445.982	682.373	480.083	553.402	1062.33	464.711
ROI.2	0	57.9951	359.037	182.867	219.886	150.345	99.0757	152.59	100.433	324.337	111.014	202.791	44.7042	27.5437	18.482		175.239	214.159	449.889	254.317	64.061	411.908	234.289	249.156	221.042	263.667	573.721	480.97	259.313	197.034	289.65
ROI.3	0	27.1436	0	0	0	4.23562	32.6955	8.75911	0	18.0574	0	9.79632	0	97.2107	0		183.62	280.679	500.837	271.313	553.362	493.08	463.656	648.723	334.572	186.385	363.664	246.296	364.031	584.682	242.731
ROI.4	174.157	121.548	227.073	290.329	263.949	384.853	293.216	467.383	394.139	220.696	232.491	409.783	298.206	476.261	415.722		185.655	447.471	642.316	341.929	619.161	583.261	442.885	873.47	734.32	456.838	668.92	492.269	548.751	779.888	428.245
ROI.5	252.593	368.794	639.001	792.518	577.721	734.263	706.113	890.104	813.773	526.107	606.974	710.328	934.678	761.806	971.434		380.531	658.419	985.44	788.573	865.79	1114.95	724.628	1110.92	805.986	618.748	979.006	650.375	759.631	1097.62	760.795
ROI.6	286.515	319.193	440.654	464.629	438.085	646.955	660.114	780.171	721.665	465.802	516.453	664.729	655.593	687.353	731.216		284.405	564.515	949.93	630.026	807.407	1024.03	691.407	1305.64	850.093	606.918	1148.95	599.593	973.023	1214.39	746.287
ROI.7	515.177	693.308	688.49	597.457	682.751	870.038	712.08	644.924	760.786	736.32	728.647	813.153	722.449	541.913	891.286		348.168	621.555	578.457	700.93	674.762	560.403	525.82	699.883	520.876	484.034	772.229	693.118	903.692	823.427	640.74
ROI.8	55.1958	57.3399	79.096	63.5238	35.5041	127.913	109.281	188.236	250.907	48.2923	116.022	129.314	204.234	193.445	200.02		53.0476	188.941	188.746	179.517	270.326	165.931	184.41	289.114	268.616	151.77	221.936	168.653	239.181	269.298	178.927
ROI.9	205.519	186.901	183.908	100.217	139.474	225.686	180.001	92.7838	106.615	65.9902	44.6906	85.3129	111.609	34.432	170.588		180.891	102.771	44.9974	109.731	90.5156	49.8817	40.009	34.3825	59.1125	0	0	0	0	20.5674	8.83839
ROI.10	89.9441	131.238	146.699	108.57	140.244	213.16	178.219	244.355	162.536	113.968	168.263	187.492	148.739	232.356	184.829		190.155	253.817	216.446	317.732	458.028	251.53	256.845	400.328	267.99	207.298	276.781	243.147	353.138	371.29	238.132
ROI.11	86.2155	127.68	234.41	280.158	230.987	337.665	308.05	425.63	366.889	211.386	256.458	307.866	316.21	496.939	420.352		148.508	384.332	552.013	309.966	446.061	432.336	372.757	655.87	569.933	377.74	575.607	379.732	492.381	708.426	403.284
ROI.12	0	53.6842	0	0	32.6057	120.17	98.8946	44.6434	0	33.1452	0	59.8009	0	152.172	0		263.867	347.576	714.24	500.299	936.907	666.919	694.014	1039.48	587.351	243.542	469.302	413.834	461.032	800.218	408.352
ROI.13	0	26.4833	0	0	27.4098	0	89.0601	27.0819	0	27.2763	0	0	0	101.676	0		274.25	281.518	477.037	329.943	664.164	413.22	520.671	681.675	430.835	220.416	443.802	310.164	278.551	619.324	286.03
ROI.14	34.4643	81.5468	0	0	68.0317	74.8292	95.6024	55.6599	0	0	0	98.2628	26.2742	188.204	0		312.459	443.583	699.734	456.672	885.245	666.02	726.812	989.247	596.608	389.102	594.062	432.932	480.417	840.477	457.322
ROI.15	41.1787	154.782	20.3236	0	69.0878	117.47	91.3472	68.6345	0	19.5776	0	114.532	12.7079	280.964	0		481.015	619.622	1109.54	645.581	1114.83	1055.08	1083.4	1399.61	893.927	556.23	838.722	622.388	732.536	1330.89	662.707
ROI.16	612.108	650.987	952.824	939.912	938.141	1256.34	1197.34	1505.61	1065.77	945.618	1017.2	1269.51	1139.63	1459.24	1385.19		726.399	1340.47	1813.2	1217.9	1786.92	1647.84	1423.64	2378.13	1851.01	1302.69	1948.7	1300.81	1809.18	2212.32	1380.85
ROI.17	218.292	232.159	381.712	352.759	342.194	446.111	455.735	589.058	396.618	349.057	360.887	470.021	409.489	530.745	521.43		306.352	434.397	619.643	466.709	711.18	580.841	599.113	886.704	682.555	483.271	720.156	457.505	750.334	834.322	581.244
ROI.18	46.5314	0	0	9.55297	63.0721	262.533	250.877	349.02	25.9656	78.7288	25.0167	276.375	53.1509	371.699	62.1766		27.7347	215.954	357.759	61.5778	228.826	357.039	225.358	842.341	321.74	143.213	447.091	110.526	304.61	470.464	134.311
ROI.19	0	13.131	83.4254	163.141	66.9534	176.28	75.7858	99.8609	149.588	0	8.1909	135.22	129.549	126.325	161.641		8.37583	161.233	146.455	124.623	162.674	157.465	53.8179	192.652	106.231	28.0173	197.222	70.714	133.535	220.343	125.625
ROI.20	31.6268	99.7373	95.637	40.5048	77.8229	124.767	73.1626	101.034	109	115.803	149.723	145.259	137.652	76.744	148.83		8.30309	92.986	76.3153	119.795	169.343	158.377	68.0538	171.587	91.9126	54.5154	171.67	145.799	177.433	187.527	105.049
ROI.21	14.699	64.445	47.26	55.7887	114.828	95.1531	57.9886	152.29	113.925	143.27	95.3921	141.481	87.9338	126.446	143.609		4.02003	105.129	135.406	82.188	73.0036	89.4962	93.1882	197.246	104.063	61.5236	129.037	72.9017	182.416	149.269	127.775
ROI.22	53.1396	80.6979	145.288	119.337	113.176	93.1206	128.649	141.279	257.554	49.1037	122.922	179.539	305.555	192.196	263.423		34.5236	212.846	242.687	226.133	364.374	152.687	208.017	333.017	285.827	159.976	233.81	232.144	265.039	316.664	207.512
ROI.23	0	0	63.3101	116.353	0	0	0	24.7428	53.8854	43.3226	0	22.4536	79.9516	54.8815	65.7918		0	92.1221	57.1002	57.7275	88.0252	68.0322	62.3062	97.8543	32.5536	37.9585	73.8895	82.409	91.6373	68.8086	70.7348
ROI.24	41.892	210.386	51.3828	0	226.69	205.492	225.196	228.084	26.9513	294.936	176.769	386.87	330.309	368.534	247.918		29.1578	353.004	217.426	401.297	675.881	255.286	395.063	452.683	556.955	525.645	474.394	642.279	962.359	503.886	730.527
ROI.25	949.749	1252.25	549.801	694.745	1292.82	1454.68	1232.54	1711.62	1038.98	1482.87	1376.04	1522.34	1510.05	1766.33	1495.6		1007.19	1932.03	1404.8	1976.01	2518.87	1609.79	1794.66	2576.65	2397.5	1879.68	1735.51	2064.53	3150.23	2574.7	2453.09
ROI.26	955.98	946.05	349.376	500.606	1022.18	1115.4	860.072	1352.77	858.703	920.669	1104.65	838.802	875.208	1267.8	1203.09		760.662	1139.22	938.298	1234.42	1629.99	1181.21	1228.14	2024.85	1444.16	1038.69	936.248	1214.63	1731.24	1843.85	1331.02
ROI.27	0	0	0	0	0	0	0	0	0	0	0	0	0	0	0		0	104.591	0	63.3402	48.3278	0	57.4433	42.9647	88.431	26.0456	0	72.6187	4.46022	0	69.2182
ROI.28	0	17.3414	0	93.2409	74.3146	23.5223	70.872	0	53.7575	14.1449	82.7549	104.057	54.8961	0	95.7206		125.024	215.121	133.832	268.899	89.7725	234.079	188.654	0	117.633	105.875	113.48	160.044	210.483	111.572	207.517
ROI.29	0	48.5439	9.39332	33.1384	18.3132	24.4638	56.3927	0	61.6445	4.08274	25.2159	33.0172	35.2474	0	51.4633		78.0696	132.528	113.488	136.044	70.9031	179.491	134.745	0	106.073	121.4	68.0364	114.112	97.7373	78.0028	145.94
ROI.30	520.928	496.872	508.637	303.143	413.249	589.288	461.306	245.636	329.803	203.297	219.106	274.047	255.83	94.3204	478.884		435.232	338.422	311.378	343.659	67.6712	174.104	202.778	68.5776	89.2431	86.1114	19.3344	75.0045	0	59.8203	116.249
ROI.31	515.336	916.977	829.104	708.398	919.329	907.303	754.948	1031.55	906.428	954.053	989.786	929.053	838.2	824.968	987.046		502.242	889.939	1007.77	891.291	1112.22	1089.19	879.778	1340.04	1017.32	848.285	1216.69	1044.49	1291.13	1359	992.585
ROI.32	148.353	194.764	0	0	146.294	200.193	159.274	166.392	0	52.2573	0	104.887	38.6989	390.791	0		1231.35	1020.92	1717.36	917.181	1897.91	1630.49	1716.69	2301.28	1303.42	808.025	1196.98	828.096	1013.98	1970.31	894.777
ROI.33	0	13.9318	0	0	27.8115	8.33582	41.6867	26.7944	0	73.3033	13.2841	137.979	97.3131	70.6978	9.3545		0	79.7386	24.6713	30.8232	194.186	27.4582	8.3937	0	114.247	130.567	50.9207	160.15	327.163	114.128	217.343
ROI.34	0	21.6462	0	0	0	14.5701	0	0	8.32445	0	0	44.8517	0	61.3172	0		120.052	169.622	294.378	175.862	320.162	291.666	260.806	393.35	232.158	166.824	217.052	196.569	276.366	405.687	230.959
ROI.35	0	137.42	48.8028	0	133.087	113.49	169.751	163.734	19.9392	297.109	183.197	400.302	341.903	339.309	151.098		0	360.306	195.493	351.377	492.955	141.397	289.042	112.56	588.183	542.095	349.138	581.2	1110.41	433.171	768.523
ROI.36	102.863	173.01	4.53513	0	86.4848	156.052	117.825	168.285	17.2686	98.6946	4.60241	119.599	10.4757	343.103	8.86352		809.843	788.867	1314.81	773.828	1532.42	1204.22	1287	1893.44	1040.56	654.111	811.561	681.627	769.54	1457.34	741.526
ROI.37	160.774	233.304	55.7444	168.268	258.38	333.106	193.751	328.801	234.445	238.827	291.219	197.934	215.013	329.163	364.52		123.924	281.079	247.666	300.263	454.233	298.827	299.825	613.769	363.167	236.707	260.403	293.535	462.727	472.456	326.196
ROI.38	9.90306	174.17	65.3002	22.6203	168.506	159.121	239.562	231.643	44.4336	337.478	215.618	427.646	420.313	421.87	137.366		121.643	455.954	398.661	609.716	837.605	325.171	543.073	389.867	807.639	641.128	570.057	759.693	1296.11	660.214	949.412
ROI.39	0	83.1305	0	0	16.542	30.5434	22.9854	54.8372	0	35.1243	0	36.885	31.217	167.242	4.91484		482.096	449.64	848.627	454.99	982.369	807.007	844.386	1144.76	644.079	415.574	584.461	418.904	552.978	965.229	494.988
ROI.40	0	86.0599	0	0	65.7868	82.735	99.6177	106.225	0	163.51	101.029	237.095	212.011	189.707	89.9572		0	169.753	78.6539	175.066	256.588	55.4581	131.962	67.7882	279.575	205.631	192.899	270.292	635.106	242.675	374.312
ROI.41	0	16.7171	0	0	0	0	0	0	0	0	0	0	0	37.5551	0		109.622	101.375	202.424	91.5711	262.034	225.362	214.682	301.084	175.128	115.141	172.971	124.989	177.134	295.466	137.349
ROI.42	169.562	371.524	0	0	159.06	301.485	247.412	186.878	0	98.9194	0	162.12	30.7027	476.332	0		978.233	1089.84	1871.03	1062.41	1939.57	1825.03	1823.72	2215.85	1278.31	909.528	1343.06	917.913	1097	2026.83	963.434
ROI.43	159.559	356.111	472.455	405.623	453.104	515.36	554.579	567.891	518.486	384.403	497.246	488.527	551.324	470.54	545.631		294.298	571.808	638.249	578.999	558.84	728.112	660.097	721.065	731.26	589.409	727.703	699.195	631.852	715.875	795.034
ROI.44	415.403	199.368	463.921	496.479	391.582	583.074	447.635	723.084	922.473	303.278	517.505	469.863	675.523	1120.63	837.136		482.878	914.453	863.77	743.449	1563.06	746.515	896.737	1438.41	843.526	600.314	898.818	682.419	653.109	984.506	743.974
ROI.45	0	29.895	36.9251	52.8089	0	18.03	32.659	14.4392	44.4183	12.5191	45.5105	19.8065	8.56993	0	57.0858		22.8406	41.0467	36.8458	45.1558	31.7676	78.4717	51.4683	99.4904	30.5611	8.63884	60.4994	41.2717	8.70243	41.8534	40.7776
ROI.46	100.709	116.438	215.861	111.573	204.281	310.312	260.884	405.528	256.991	169.432	192.474	246.869	246.863	336.722	249.201		179.583	332.98	341.281	381.67	582.046	327.916	293.992	628.836	353.421	290.015	336.465	324.871	488.502	545.003	298.703
ROI.47	120.854	91.9362	161.392	117.927	147.749	301.287	229.136	351.217	253.051	153.327	176.363	201.862	249.813	287.953	236.869		204.304	301.193	279.136	262.071	541.12	295.069	320.45	610.067	285.262	232.798	285.954	264.412	422.627	490.522	322.942
ROI.48	0	0	0	9.69323	0	43.3809	29.841	69.4837	4.06191	9.13905	49.7839	49.2297	8.58034	64.7207	38.2275		0	41.7612	59.0753	63.8082	129.141	79.3735	47.0802	114.916	37.2355	28.9092	67.5212	86.4434	47.373	141.165	49.9238
ROI.49	13.2216	18.471	117.04	116.689	112.664	173.351	135.07	155.938	166.809	79.0549	112.696	126.111	115.888	227.414	165.675		112.228	206.564	301.868	154.111	238.054	245.254	221.335	328.282	285.049	186.512	265.167	147.909	272.682	294.881	283.354
ROI.50	147.693	94.8712	207.804	253.635	231.993	290.556	251.659	357.437	247.021	211.576	207.02	352.391	248.401	326.748	338.88		186.669	361.32	448.922	253.673	322.757	379.929	296.526	657.126	460.033	266.42	546.853	291.353	439.851	581.117	338.179
ROI.51	174.881	140.767	267.687	288.777	335.733	421.883	364.522	405.362	289.945	297.135	332.447	262.281	376.838	396.011	386.639		239.021	368.83	543.876	334.029	507.943	472.63	370.883	744.249	521.381	330.137	499.789	336.572	486.472	727.422	369.11
ROI.52	98.0087	194.054	259.54	274.15	250.037	467.692	300.488	450.454	312.167	278.176	284.746	380.614	404.802	457.44	479.788		135.716	383.494	482.389	356.395	674.609	440.311	417.452	814.602	591.679	320.569	642.673	376.625	619.844	759.836	463.75
ROI.53	129.758	41.6093	205.479	234.862	166.434	278.298	241.18	314.821	295.699	194.638	194.271	308.823	214.443	394.828	383.98		179.708	290.909	420.331	240.535	437.801	387.303	343.544	596.501	511.681	329.957	487.874	344.773	408.65	549.359	315.67
ROI.54	137.78	119.613	254.643	234.121	194.532	311.678	255.355	397.549	365.9	200.892	253.067	360.724	277.063	447.385	373.41		203.653	389.03	561.177	364.22	552.577	515.454	380.175	791.515	579.511	376.181	538.269	427.855	512.787	648.69	418.355
ROI.55	0	0	23.0722	27.499	4.20293	23.5106	13.0546	21.5743	4.4531	4.17018	18.6212	4.07064	14.8388	0	0		0	91.5369	44.7897	58.7374	33.2024	8.97955	22.0555	29.1328	100.41	41.4745	0	59.9234	44.2489	17.8152	94.7538
ROI.56	259.581	296.581	452.224	320.912	398.592	605.468	542.32	743.044	484.828	303.637	427.531	510.741	513.63	638.906	519.933		413.241	622.791	727.038	643.859	1179.11	624.455	674.736	1225.49	767.661	591.659	730.193	583.811	930.108	1051.02	685.473
ROI.57	235.902	351.126	375.785	299.465	405.975	426.834	449.343	425.481	460.644	334.348	320.308	415.524	424.019	354.961	455.298		244.239	236.789	505.786	301.607	218.615	590.084	360.464	335.555	288.791	326.795	546.566	400.517	452.565	477.961	458.929
ROI.58	0	0	21.4066	8.36977	12.6908	49.3701	49.4807	82.2997	52.0519	4.18447	59.11	87.387	42.6324	121.782	69.7703		13.2836	60.1123	124.757	21.8429	111.471	69.7205	86.2488	133.72	146.304	92.2626	117.479	56.1626	81.954	143.644	96.1394
ROI.59	45.9981	37.3979	366.69	409.147	251.437	264.614	352.504	501.402	393.149	218.866	262.553	257.708	493.582	305.659	596.466		225.143	277.445	650.394	476.243	631.523	722.88	431.248	646.307	408.958	322.392	658.415	329.132	478.009	672.955	448.857
ROI.60	177.567	80.5565	0	17.8937	153.542	306.003	192.42	319.931	135.894	232.718	79.7858	225.085	265.516	333.844	157.789		124.558	106.422	80.1717	85.3549	249.586	33.7991	68.8496	613.777	93.1204	21.9237	88.3191	19.0915	173.831	297.821	54.7725
ROI.61	111.166	83.6778	150.964	155.756	89.7015	218.362	260.844	322.942	250.067	190.598	221.604	252.948	249.385	289.792	284.313		155.767	273.699	342.749	281.172	301.914	411.201	316.398	546.613	383.866	259.814	475.861	281.849	410.055	548.005	364.998
ROI.62	490.309	610.448	762.145	783.488	743.323	957.934	873.372	935.137	1013.54	643.47	736.555	969.063	984.334	894.769	931.64		516.404	637.227	970.339	725.667	731.8	1244.64	690.082	1180.66	875.149	662.546	922.431	736.594	827.414	1058.17	668.799
ROI.63	0	8.71205	80.5971	25.3168	46.2415	64.3833	63.7918	106.218	99.6614	0	75.1196	98.1808	44.0051	113.89	108.597		12.6587	32.241	121.73	25.8321	71.0265	88.8031	73.3624	141.02	119.047	50.291	151.458	78.3121	106.575	130.859	71.9264
ROI.64	0	4.05176	0	19.0016	48.947	44.179	36.4032	73.6291	29.756	18.7628	41.8161	38.6001	18.4619	103.959	58.5747		4.23783	61.4312	56.3728	77.1891	105.48	79.8092	79.2036	117.489	60.215	56.2476	111.845	93.6227	91.6336	135.011	55.4537
ROI.65	63.2922	89.8445	216.758	112.54	143.969	200.692	220.157	294.925	230.446	127.199	156.817	246.849	210.468	292.572	171.55		156.263	251.724	306.903	261.556	480.298	269.239	310.152	543.438	348.578	229.102	292.454	299.607	392.228	455.957	267.824
ROI.66	378.233	309.109	549.494	647.989	519.155	864.466	869.018	1106.48	734.607	609.236	632.77	807.387	799.859	844.222	938.869		518.145	954.04	1433.44	899.4	1216.85	1480.68	1086.05	1895.13	1368.43	914.829	1500.19	937.159	1257.67	1757.78	1168.82
ROI.67	12.94	0	71.0478	131.346	91.0353	38.6753	103.062	144.324	73.0682	67.3325	67.7337	50.5031	130.97	90.1581	207.766		58.6259	111.428	257.623	150.42	217.783	248.194	122.004	180.594	125.915	139.723	249.732	87.8513	132.752	148.966	262.657
ROI.68	58.9756	38.7567	49.4122	59.1619	62.4132	166.958	170.23	179.66	182.832	163.472	119.724	197.558	215.641	148.521	198.36		9.23156	197.863	243.173	245.456	388.593	177.136	267.944	428.851	312.181	186.161	344.343	307.122	413.777	452.695	302.824
ROI.69	41.2551	64.7149	137.764	148.427	152.578	267.835	193.025	298.039	271.374	120.947	160.657	261.634	195.886	396.015	243.352		82.0512	260.353	364.85	216.229	354.863	313.877	278.676	449.728	387.862	270.994	432.1	307.337	315.566	483.509	270.956
ROI.70	24.3661	65.764	96.4245	121.836	98.3382	199.93	143.293	230.442	186.306	91.8214	128.591	160.774	143.994	220.789	169.686		65.5152	196.867	238.613	179.307	251.846	251.08	212.021	422.278	290.304	154.128	342.956	197.424	227.917	329.922	212.71
ROI.71	0	0	0	0	8.97718	0	4.00015	8.95323	0	4.02723	0	9.85761	0	0	0		0	0	86.9544	0	0	12.3814	0	4.05029	0	0	170.714	0	4.22042	14.4861	0
ROI.72	4.08892	0	10.4086	58.3036	58.7351	0	81.8424	52.4556	0	8.73251	9.86855	4.70739	4.03537	22.2065	64.338		0	22.4957	85.5011	8.12004	33.0784	92.8731	41.4614	70.5	51.6482	24.2024	143.043	58.0367	137.604	165.527	0
ROI.73	0	0	0	0	0	0	0	0	0	0	0	0	0	0	18.0688		18.0891	20.2225	72.6746	128.527	181.614	36.7521	200.157	0	75.7712	17.6283	0	61.3247	0	0	65.6834
ROI.74	0	0	0	83.7046	0	0	0	0	16.571	0	0	0	0	0	0		4.15376	0	82.6139	0	0	99.7659	0	0	0	0	42.9487	0	0	0	0
ROI.75	72.4978	63.7337	55.2812	137.354	117.675	128.11	126.445	149.164	221.83	79.369	93.2875	162.202	198.302	162.944	126.726		0	0	108.377	4.40597	0	173.233	0	176.84	0	0	128.139	8.61334	89.0695	105.758	0
ROI.76	0	0	0	0	0	0	0	0	0	0	0	0	0	8.22951	0		122.957	189.76	99.1674	211.409	477.739	27.5229	273.594	261.564	183.823	42.9872	13.5396	105.561	82.4545	78.4029	127.067
ROI.77	0	4.13119	8.4611	0	0	0	34.5753	73.1154	39.9372	22.2925	0	65.7201	52.7549	58.6345	71.9269		0	24.3347	92.9461	18.9999	89.9785	63.0854	46.4204	144.311	119.11	36.957	148.114	13.57	67.2712	125.135	56.1332
ROI.78	0	0	0	0	0	0	0	0	0	0	0	0	0	0	0		0	0	34.7618	99.4192	35.5893	8.55106	42.9306	62.1207	57.0216	0	0	0	36.2917	23.1706	4.05402
ROI.79	0	0	8.21036	28.0443	0	0	0	0	34.8525	21.7009	0	0	19.1378	26.0181	36.4277		0	0	46.0341	60.9	0	17.0559	36.2448	13.4802	0	8.2991	85.4314	33.1649	34.0371	30.8286	25.7519
ROI.80	0	0	0	0	0	0	0	0	0	0	0	0	0	0	0		58.8854	8.2941	0	0	63.6981	0	4.10112	32.8964	0	0	0	0	0	0	0
ROI.81	0	0	0	0	0	0	0	0	0	0	0	0	0	0	0		25.2316	0	0	47.0453	144.018	0	50.7086	98.4056	48.7959	0	0	0	0	30.043	25.2531
ROI.82	0	29.6253	70.2985	41.5629	25.0509	64.3749	18.5992	0	48.3913	0	45.4835	52.029	54.6192	27.7664	144.035		0	4.09278	0	0	43.3497	30.0206	46.4287	56.6853	0	0	41.1605	0	72.439	76.0553	0
ROI.83	0	0	0	0	0	0	0	0	12.8483	0	0	16.5032	0	32.0411	0		0	0	0	8.48998	67.2678	23.2927	8.76469	38.2581	33.3801	0	22.9031	0	0	13.9185	0
ROI.84	61.6141	31.2013	66.8356	58.1408	14.7556	78.6694	111.826	99.3076	147.792	77.5328	72.7887	123.686	143.48	128.267	169.928		24.3552	42.7852	182.092	80.4206	114.578	169.521	92.698	204.792	124.573	53.6102	180.695	106.123	155.44	235.715	119.622
ROI.85	0	0	4.0262	0	0	12.9366	0	18.6866	0	0	28.1728	0	0	23.5039	0		0	0	4.02348	0	119.618	0	8.70289	46.3192	0	0	23.5451	28.7394	47.5761	58.47	28.2284
ROI.86	103.782	69.806	8.31271	12.8936	149.244	268.685	176.06	313.272	93.1799	159.124	4.01853	152.293	229.422	286.132	86.2763		58.8431	25.8209	0	0	271.512	8.37885	19.2376	483.794	0	4.75625	46.8973	0	62.5365	192.638	4.02934
ROI.87	0	0	8.4611	8.18266	0	31.6301	21.3594	105.042	79.1657	18.0934	0	43.0372	42.8982	4.3159	18.6647		0	30.7131	26.2552	0	39.3677	93.4501	22.0152	137.234	82.8459	0	103.565	79.1648	98.9247	118.828	34.0952
ROI.88	0	0	0	0	0	0	0	0	0	0	0	0	0	0	0		102.895	74.2213	49.4873	117.245	225.523	18.4222	138.667	148.201	70.6356	8.54915	29.5729	16.6367	4.60066	49.0955	25.6836
ROI.89	8.46133	0	0	0	4.4242	35.1341	40.9052	58.1081	0	63.4732	0	31.9808	21.1273	51.8943	0		0	0	0	0	0	0	38.6681	176.867	27.6106	0	0	0	114.493	86.4627	0
ROI.90	0	0	0	0	8.41797	0	0	4.48583	0	33.3043	0	0	29.2619	17.6371	0		0	0	0	0	0	0	0	86.1686	0	0	0	0	78.2608	99.5011	0
ROI.91	0	0	0	0	0	8.49478	42.3125	0	0	30.9889	0	49.6317	4.02082	0	0		0	0	67.3187	0	0	4.32733	0	60.4307	0	0	296.188	0	65.3116	90.6768	0
ROI.92	42.4582	0	14.822	0	35.7074	17.7149	13.5753	39.4936	32.4912	18.0242	13.2549	101.127	120.147	74.4977	31.887		0	0	4.22352	0	0	53.9797	4.34863	130.698	0	0	73.6615	13.7662	12.6283	105.91	13.102
ROI.93	0	42.2352	0	0	0	0	0	0	0	0	0	0	0	0	0		0	0	0	0	0	0	0	116.101	67.1483	0	52.3733	17.69	0	59.9908	32.1672
ROI.94	0	0	0	0	0	0	0	0	0	0	0	0	8.47744	0	23.2862		0	0	0	0	0	0	0	69.2252	0	0	4.04437	0	21.657	14.1634	0
ROI.95	0	0	12.6711	0	0	0	0	0	0	0	0	14.2868	0	29.7067	0		0	0	32.9014	0	0	31.4544	0	58.6281	12.363	0	39.2352	0	8.86467	28.6596	0
ROI.96	0	0	0	0	0	0	0	13.2003	0	0	0	31.4542	0	0	0		0	0	0	0	0	0	0	61.2844	0	0	0	0	0	16.9367	0
ROI.97	0	0	0	0	0	0	0	0	0	0	0	0	0	0	0		0	0	0	0	0	0	0	48.0977	0	0	0	0	0	22.5429	0
ROI.98	0	0	0	0	0	0	0	0	0	0	0	0	0	8.7094	0		0	0	8.22397	0	0	0	0	111.632	54.6359	4.11965	37.9436	0	39.5327	35.6132	13.558
ROI.99	0	0	0	0	0	0	0	17.8489	0	0	0	0	0	0	0		0	0	0	0	0	0	0	62.5527	0	0	17.4474	0	0	0	0
ROI.100	0	0	0	0	0	8.45979	0	0	0	0	12.4686	0	0	0	39.0147		0	38.4074	0	4.18178	25.677	0	0	8.84106	55.1586	65.3346	0	33.6455	0	0	60.7031
ROI.101	0	0	0	0	0	0	0	0	0	0	0	0	0	0	0		0	0	0	0	0	0	0	4.06459	0	0	104.942	0	0	0	0
ROI.102	0	0	0	8.18816	28.2638	0	0	0	0	0	0	0	0	0	0		0	8.82554	49.3548	0	0	0	0	30.5347	0	0	202.119	0	13.0719	35.3702	0
ROI.103	0	49.4161	53.1786	15.0389	32.1658	0	0	73.9515	115.005	100.68	101.789	105.709	68.5571	61.1336	187.965		0	31.963	19.8796	0	4.42817	4.3291	49.6089	53.1621	62.3413	92.3749	170.171	178.195	102.881	105.465	152.48
ROI.104	0	0	0	0	23.2295	4.37011	0	12.768	0	0	0	4.25033	0	0	0		0	0	24.5811	0	0	4.01363	0	62.1034	0	0	115.359	0	0	92.3537	8.23982
ROI.105	0	0	0	0	0	0	0	0	0	0	0	0	0	0	0		0	0	0	0	0	0	0	0	0	0	44.5759	0	0	0	0
ROI.106	0	8.88901	0	4.1351	14.0741	0	17.7186	0	0	9.39576	0	28.2686	0	0	54.5751		0	0	0	39.3469	21.6177	52.7489	0	18.9117	0	0	43.8219	21.8198	27.2706	80.6169	4.31872
ROI.107	0	0	0	0	0	0	8.51336	13.3284	0	0	0	0	0	0	0		0	0	0	0	0	0	0	13.6306	4.03735	0	0	0	54.6766	14.8506	0
ROI.108	18.8077	0	0	0	0	17.0766	0	44.7654	17.4882	0	0	4.00023	0	0	0		18.6112	28.598	37.8781	28.3984	36.8796	52.202	12.0313	67.2384	20.1258	4.28846	18.9441	0	37.5287	77.7575	37.0514
ROI.109	0	0	0	0	0	0	0	0	0	0	0	0	0	0	0		0	0	0	0	4.57196	0	0	0	53.3872	0	0	18.1511	47.2301	8.46876	0
ROI.110	0	0	0	0	0	0	0	0	0	0	0	0	0	0	0		0	0	0	0	0	0	0	0	0	0	0	0	4.15672	27.9206	4.08612
ROI.111	0	0	0	0	0	0	0	0	0	0	0	0	22.5645	0	0		0	110.739	45.9729	132.776	183.114	0	82.0607	152.6	154.9	87.1791	74.6473	96.6385	242.169	74.2775	191.801
ROI.112	0	0	0	0	0	0	0	0	0	0	0	0	0	0	0		0	0	0	51.1367	30.9185	0	53.6736	12.5113	42.9213	8.38766	0	48.5871	0	0	66.823
ROI.113	25.0582	40.2913	42.8127	20.8078	25.7594	67.4261	28.1871	52.2083	30.873	32.4702	55.0202	31.1719	26.2926	30.9949	38.4805		4.32804	27.2858	47.6437	38.3407	38.4449	56.1592	15.8946	42.1776	30.2353	48.4223	52.2779	47.7737	80.6929	58.544	46.1595
ROI.114	109.004	329.844	193.563	249.994	336.128	330.505	336.594	383.336	359.494	349.952	376.775	327.892	321.228	330.025	379.324		374.817	665.828	542.006	684.444	665.076	694.01	620.394	771.582	707.822	544.659	591.081	574.059	790.494	802.465	697.393
ROI.115	29.2563	44.2885	4.58431	23.9557	30.6612	38.2807	45.5693	72.7326	41.9903	24.0114	36.3621	35.3336	30.426	38.5784	72.9698		12.9448	53.5235	79.7031	62.6211	115.338	53.7258	49.591	112.027	93.9941	46.6635	49.8571	51.374	91.3202	82.9331	73.595
ROI.116	0	0	0	0	0	0	0	0	0	0	0	0	0	0	0		0	0	23.3297	4.18516	104.444	0	0	82.0082	35.6025	0	0	0	0	0	0
ROI.117	0	98.8765	24.03	32.5921	32.2627	24.205	21.6909	0	22.8593	26.0719	4.66911	103.957	14.331	49.4047	31.5479		124.988	254.372	279.436	271.113	365.612	317.533	310.445	282.016	247.976	229.622	255.143	192.8	284.543	338.531	271.805
ROI.118	175.322	288.527	0	0	131.22	181.374	194.063	197.548	0	71.7159	0	139.517	47.3875	432.73	0		1295.53	954.302	1961.44	910.391	1718.58	1726.53	1644.22	2341.1	1393.2	877.06	1382.63	850.257	1128.05	2161.19	958.453
ROI.119	117.988	297.96	392.505	371.806	392.222	514.613	509.415	641.449	541.081	414.254	442.553	526.502	561.015	573.032	662.146		203.96	510.51	825.335	581.359	666.221	824.556	653.533	1037.87	832.429	602.515	950.277	661.324	869.684	1010.8	857.512
ROI.120	22.9118	30.9249	4.13525	8.2238	96.6908	126.738	98.8588	161.578	75.4042	80.645	46.3822	87.8922	111.403	128.237	151.292		64.3251	22.6829	30.3645	31.9945	157.159	28.2981	47.8591	319.997	15.3559	0	60.5373	0	121.74	190.717	21.1141
ROI.121	48.8667	16.178	88.4135	89.9544	83.0579	151.904	93.4364	183.731	131.925	65.7142	118.686	181.549	132.756	233.865	171.003		93.1239	151.237	238.815	144.405	230.534	206.377	177.595	307.059	262.026	188.04	271.905	194.904	205.3	314.052	181.042
ROI.122	0	0	0	16.6494	0	0	0	0	0	0	0	0	0	0	0		0	0	21.6588	0	0	78.3211	0	0	0	0	44.6246	0	0	0	0
ROI.123	0	0	0	0	0	0	0	0	4.1458	0	0	0	8.3037	23.1651	12.804		0	0	4.32073	0	37.6754	12.581	0	0	0	0	35.5943	0	9.59905	4.23363	0
ROI.124	0	0	0	0	0	0	0	0	0	8.59271	0	0	0	0	0		0	0	24.9209	0	27.6137	0	8.70212	4.46182	0	0	0	0	0	0	0
ROI.125	0	0	0	0	0	0	0	0	0	0	0	0	0	13.7459	0		0	0	8.37156	8.7369	0	0	0	24.0956	35.9305	0	36.3245	0	0	18.1794	26.4631
ROI.126	0	0	0	0	0	0	0	0	0	0	0	0	0	0	0		0	0	0	0	0	4.071	0	0	0	0	36.3228	14.8953	23.2927	18.2909	0
ROI.127	0	0	0	0	0	0	0	0	0	0	0	0	0	0	0		0	0	0	0	22.5593	0	0	4.01064	0	0	41.2062	4.1948	14.0357	43.1102	0
ROI.128	0	0	0	0	0	0	0	0	0	0	0	0	0	0	15.5775		0	0	0	0	0	0	0	0	0	0	0	0	0	0	0
ROI.129	0	0	0	0	0	0	0	0	0	0	0	0	0	0	23.058		0	0	0	0	0	0	0	0	0	0	0	0	0	0	0
ROI.130	0	0	0	0	0	0	0	29.9939	0	26.5872	0	0	0	10.2047	54.0098		0	0	0	13.4464	0	0	4.11019	0	0	8.42332	0	0	0	31.9079	0
ROI.131	0	0	0	0	0	0	0	0	0	0	0	27.2946	0	0	0		0	0	0	0	0	0	0	0	0	0	0	0	0	0	0
ROI.132	0	0	0	0	0	0	0	0	0	0	0	30.9138	0	0	0		0	0	0	0	0	0	0	8.39112	0	0	0	0	0	0	0
ROI.133	124.411	379.791	210.811	259.007	372.056	361.602	404.184	358.236	274.634	356.299	380.559	404.689	346.489	293.346	393.992		298.74	651.653	474.716	678.972	695.943	584.939	617.876	444.029	591.181	560.227	445.356	558.752	738.12	549.917	678.799
ROI.134	5.25518	56.3387	76.3656	43.6374	44.4547	31.1543	54.7793	30.2478	82.6897	33.836	56.8084	37.7369	23.1559	9.6589	40.0065		92.6401	160.341	112.564	135.972	108.898	166.289	102.492	71.9213	96.3972	102.362	115.978	98.0314	112.592	104.4	132.18
ROI.135	159.005	126.963	24.817	67.4841	168.674	174.939	145.655	233.372	127.574	173.911	156.885	180.87	160.874	211.368	76.5208		143.074	208.175	149.931	201.256	276.792	212.784	217.319	306.776	285.434	206.465	199.115	259.501	297.435	339.532	286.753

## Sheet: ver2
Table S2. Matrix of integrals obtained by batch integration of the 135 ROIs defined with rNMR on the 1H-13C HSQC spectra.
	Cannibal
ROI No.	1	2	3	4	5	6	7	8	9	10	11	12	13	14	15
ROI.1	53.7404	147.519	0	0	59.3297	110.846	114.589	93.6014	0	13.6002	0	40.064	0	195.065	0
ROI.2	0	57.9951	359.037	182.867	219.886	150.345	99.0757	152.59	100.433	324.337	111.014	202.791	44.7042	27.5437	18.482
ROI.3	0	27.1436	0	0	0	4.23562	32.6955	8.75911	0	18.0574	0	9.79632	0	97.2107	0
ROI.4	174.157	121.548	227.073	290.329	263.949	384.853	293.216	467.383	394.139	220.696	232.491	409.783	298.206	476.261	415.722
ROI.5	252.593	368.794	639.001	792.518	577.721	734.263	706.113	890.104	813.773	526.107	606.974	710.328	934.678	761.806	971.434
ROI.6	286.515	319.193	440.654	464.629	438.085	646.955	660.114	780.171	721.665	465.802	516.453	664.729	655.593	687.353	731.216
ROI.7	515.177	693.308	688.49	597.457	682.751	870.038	712.08	644.924	760.786	736.32	728.647	813.153	722.449	541.913	891.286
ROI.8	55.1958	57.3399	79.096	63.5238	35.5041	127.913	109.281	188.236	250.907	48.2923	116.022	129.314	204.234	193.445	200.02
ROI.9	205.519	186.901	183.908	100.217	139.474	225.686	180.001	92.7838	106.615	65.9902	44.6906	85.3129	111.609	34.432	170.588
ROI.10	89.9441	131.238	146.699	108.57	140.244	213.16	178.219	244.355	162.536	113.968	168.263	187.492	148.739	232.356	184.829
ROI.11	86.2155	127.68	234.41	280.158	230.987	337.665	308.05	425.63	366.889	211.386	256.458	307.866	316.21	496.939	420.352
ROI.12	0	53.6842	0	0	32.6057	120.17	98.8946	44.6434	0	33.1452	0	59.8009	0	152.172	0
ROI.13	0	26.4833	0	0	27.4098	0	89.0601	27.0819	0	27.2763	0	0	0	101.676	0
ROI.14	34.4643	81.5468	0	0	68.0317	74.8292	95.6024	55.6599	0	0	0	98.2628	26.2742	188.204	0
ROI.15	41.1787	154.782	20.3236	0	69.0878	117.47	91.3472	68.6345	0	19.5776	0	114.532	12.7079	280.964	0
ROI.16	612.108	650.987	952.824	939.912	938.141	1256.34	1197.34	1505.61	1065.77	945.618	1017.2	1269.51	1139.63	1459.24	1385.19
ROI.17	218.292	232.159	381.712	352.759	342.194	446.111	455.735	589.058	396.618	349.057	360.887	470.021	409.489	530.745	521.43
ROI.18	46.5314	0	0	9.55297	63.0721	262.533	250.877	349.02	25.9656	78.7288	25.0167	276.375	53.1509	371.699	62.1766
ROI.19	0	13.131	83.4254	163.141	66.9534	176.28	75.7858	99.8609	149.588	0	8.1909	135.22	129.549	126.325	161.641
ROI.20	31.6268	99.7373	95.637	40.5048	77.8229	124.767	73.1626	101.034	109	115.803	149.723	145.259	137.652	76.744	148.83
ROI.21	14.699	64.445	47.26	55.7887	114.828	95.1531	57.9886	152.29	113.925	143.27	95.3921	141.481	87.9338	126.446	143.609
ROI.22	53.1396	80.6979	145.288	119.337	113.176	93.1206	128.649	141.279	257.554	49.1037	122.922	179.539	305.555	192.196	263.423
ROI.23	0	0	63.3101	116.353	0	0	0	24.7428	53.8854	43.3226	0	22.4536	79.9516	54.8815	65.7918
ROI.24	41.892	210.386	51.3828	0	226.69	205.492	225.196	228.084	26.9513	294.936	176.769	386.87	330.309	368.534	247.918
ROI.25	949.749	1252.25	549.801	694.745	1292.82	1454.68	1232.54	1711.62	1038.98	1482.87	1376.04	1522.34	1510.05	1766.33	1495.6
ROI.26	955.98	946.05	349.376	500.606	1022.18	1115.4	860.072	1352.77	858.703	920.669	1104.65	838.802	875.208	1267.8	1203.09
ROI.27	0	0	0	0	0	0	0	0	0	0	0	0	0	0	0
ROI.28	0	17.3414	0	93.2409	74.3146	23.5223	70.872	0	53.7575	14.1449	82.7549	104.057	54.8961	0	95.7206
ROI.29	0	48.5439	9.39332	33.1384	18.3132	24.4638	56.3927	0	61.6445	4.08274	25.2159	33.0172	35.2474	0	51.4633
ROI.30	520.928	496.872	508.637	303.143	413.249	589.288	461.306	245.636	329.803	203.297	219.106	274.047	255.83	94.3204	478.884
ROI.31	515.336	916.977	829.104	708.398	919.329	907.303	754.948	1031.55	906.428	954.053	989.786	929.053	838.2	824.968	987.046
ROI.32	148.353	194.764	0	0	146.294	200.193	159.274	166.392	0	52.2573	0	104.887	38.6989	390.791	0
ROI.33	0	13.9318	0	0	27.8115	8.33582	41.6867	26.7944	0	73.3033	13.2841	137.979	97.3131	70.6978	9.3545
ROI.34	0	21.6462	0	0	0	14.5701	0	0	8.32445	0	0	44.8517	0	61.3172	0
ROI.35	0	137.42	48.8028	0	133.087	113.49	169.751	163.734	19.9392	297.109	183.197	400.302	341.903	339.309	151.098
ROI.36	102.863	173.01	4.53513	0	86.4848	156.052	117.825	168.285	17.2686	98.6946	4.60241	119.599	10.4757	343.103	8.86352
ROI.37	160.774	233.304	55.7444	168.268	258.38	333.106	193.751	328.801	234.445	238.827	291.219	197.934	215.013	329.163	364.52
ROI.38	9.90306	174.17	65.3002	22.6203	168.506	159.121	239.562	231.643	44.4336	337.478	215.618	427.646	420.313	421.87	137.366
ROI.39	0	83.1305	0	0	16.542	30.5434	22.9854	54.8372	0	35.1243	0	36.885	31.217	167.242	4.91484
ROI.40	0	86.0599	0	0	65.7868	82.735	99.6177	106.225	0	163.51	101.029	237.095	212.011	189.707	89.9572
ROI.41	0	16.7171	0	0	0	0	0	0	0	0	0	0	0	37.5551	0
ROI.42	169.562	371.524	0	0	159.06	301.485	247.412	186.878	0	98.9194	0	162.12	30.7027	476.332	0
ROI.43	159.559	356.111	472.455	405.623	453.104	515.36	554.579	567.891	518.486	384.403	497.246	488.527	551.324	470.54	545.631
ROI.44	415.403	199.368	463.921	496.479	391.582	583.074	447.635	723.084	922.473	303.278	517.505	469.863	675.523	1120.63	837.136
ROI.45	0	29.895	36.9251	52.8089	0	18.03	32.659	14.4392	44.4183	12.5191	45.5105	19.8065	8.56993	0	57.0858
ROI.46	100.709	116.438	215.861	111.573	204.281	310.312	260.884	405.528	256.991	169.432	192.474	246.869	246.863	336.722	249.201
ROI.47	120.854	91.9362	161.392	117.927	147.749	301.287	229.136	351.217	253.051	153.327	176.363	201.862	249.813	287.953	236.869
ROI.48	0	0	0	9.69323	0	43.3809	29.841	69.4837	4.06191	9.13905	49.7839	49.2297	8.58034	64.7207	38.2275
ROI.49	13.2216	18.471	117.04	116.689	112.664	173.351	135.07	155.938	166.809	79.0549	112.696	126.111	115.888	227.414	165.675
ROI.50	147.693	94.8712	207.804	253.635	231.993	290.556	251.659	357.437	247.021	211.576	207.02	352.391	248.401	326.748	338.88
ROI.51	174.881	140.767	267.687	288.777	335.733	421.883	364.522	405.362	289.945	297.135	332.447	262.281	376.838	396.011	386.639
ROI.52	98.0087	194.054	259.54	274.15	250.037	467.692	300.488	450.454	312.167	278.176	284.746	380.614	404.802	457.44	479.788
ROI.53	129.758	41.6093	205.479	234.862	166.434	278.298	241.18	314.821	295.699	194.638	194.271	308.823	214.443	394.828	383.98
ROI.54	137.78	119.613	254.643	234.121	194.532	311.678	255.355	397.549	365.9	200.892	253.067	360.724	277.063	447.385	373.41
ROI.55	0	0	23.0722	27.499	4.20293	23.5106	13.0546	21.5743	4.4531	4.17018	18.6212	4.07064	14.8388	0	0
ROI.56	259.581	296.581	452.224	320.912	398.592	605.468	542.32	743.044	484.828	303.637	427.531	510.741	513.63	638.906	519.933
ROI.57	235.902	351.126	375.785	299.465	405.975	426.834	449.343	425.481	460.644	334.348	320.308	415.524	424.019	354.961	455.298
ROI.58	0	0	21.4066	8.36977	12.6908	49.3701	49.4807	82.2997	52.0519	4.18447	59.11	87.387	42.6324	121.782	69.7703
ROI.59	45.9981	37.3979	366.69	409.147	251.437	264.614	352.504	501.402	393.149	218.866	262.553	257.708	493.582	305.659	596.466
ROI.60	177.567	80.5565	0	17.8937	153.542	306.003	192.42	319.931	135.894	232.718	79.7858	225.085	265.516	333.844	157.789
ROI.61	111.166	83.6778	150.964	155.756	89.7015	218.362	260.844	322.942	250.067	190.598	221.604	252.948	249.385	289.792	284.313
ROI.62	490.309	610.448	762.145	783.488	743.323	957.934	873.372	935.137	1013.54	643.47	736.555	969.063	984.334	894.769	931.64
ROI.63	0	8.71205	80.5971	25.3168	46.2415	64.3833	63.7918	106.218	99.6614	0	75.1196	98.1808	44.0051	113.89	108.597
ROI.64	0	4.05176	0	19.0016	48.947	44.179	36.4032	73.6291	29.756	18.7628	41.8161	38.6001	18.4619	103.959	58.5747
ROI.65	63.2922	89.8445	216.758	112.54	143.969	200.692	220.157	294.925	230.446	127.199	156.817	246.849	210.468	292.572	171.55
ROI.66	378.233	309.109	549.494	647.989	519.155	864.466	869.018	1106.48	734.607	609.236	632.77	807.387	799.859	844.222	938.869
ROI.67	12.94	0	71.0478	131.346	91.0353	38.6753	103.062	144.324	73.0682	67.3325	67.7337	50.5031	130.97	90.1581	207.766
ROI.68	58.9756	38.7567	49.4122	59.1619	62.4132	166.958	170.23	179.66	182.832	163.472	119.724	197.558	215.641	148.521	198.36
ROI.69	41.2551	64.7149	137.764	148.427	152.578	267.835	193.025	298.039	271.374	120.947	160.657	261.634	195.886	396.015	243.352
ROI.70	24.3661	65.764	96.4245	121.836	98.3382	199.93	143.293	230.442	186.306	91.8214	128.591	160.774	143.994	220.789	169.686
ROI.71	0	0	0	0	8.97718	0	4.00015	8.95323	0	4.02723	0	9.85761	0	0	0
ROI.72	4.08892	0	10.4086	58.3036	58.7351	0	81.8424	52.4556	0	8.73251	9.86855	4.70739	4.03537	22.2065	64.338
ROI.73	0	0	0	0	0	0	0	0	0	0	0	0	0	0	18.0688
ROI.74	0	0	0	83.7046	0	0	0	0	16.571	0	0	0	0	0	0
ROI.75	72.4978	63.7337	55.2812	137.354	117.675	128.11	126.445	149.164	221.83	79.369	93.2875	162.202	198.302	162.944	126.726
ROI.76	0	0	0	0	0	0	0	0	0	0	0	0	0	8.22951	0
ROI.77	0	4.13119	8.4611	0	0	0	34.5753	73.1154	39.9372	22.2925	0	65.7201	52.7549	58.6345	71.9269
ROI.78	0	0	0	0	0	0	0	0	0	0	0	0	0	0	0
ROI.79	0	0	8.21036	28.0443	0	0	0	0	34.8525	21.7009	0	0	19.1378	26.0181	36.4277
ROI.80	0	0	0	0	0	0	0	0	0	0	0	0	0	0	0
ROI.81	0	0	0	0	0	0	0	0	0	0	0	0	0	0	0
ROI.82	0	29.6253	70.2985	41.5629	25.0509	64.3749	18.5992	0	48.3913	0	45.4835	52.029	54.6192	27.7664	144.035
ROI.83	0	0	0	0	0	0	0	0	12.8483	0	0	16.5032	0	32.0411	0
ROI.84	61.6141	31.2013	66.8356	58.1408	14.7556	78.6694	111.826	99.3076	147.792	77.5328	72.7887	123.686	143.48	128.267	169.928
ROI.85	0	0	4.0262	0	0	12.9366	0	18.6866	0	0	28.1728	0	0	23.5039	0
ROI.86	103.782	69.806	8.31271	12.8936	149.244	268.685	176.06	313.272	93.1799	159.124	4.01853	152.293	229.422	286.132	86.2763
ROI.87	0	0	8.4611	8.18266	0	31.6301	21.3594	105.042	79.1657	18.0934	0	43.0372	42.8982	4.3159	18.6647
ROI.88	0	0	0	0	0	0	0	0	0	0	0	0	0	0	0
ROI.89	8.46133	0	0	0	4.4242	35.1341	40.9052	58.1081	0	63.4732	0	31.9808	21.1273	51.8943	0
ROI.90	0	0	0	0	8.41797	0	0	4.48583	0	33.3043	0	0	29.2619	17.6371	0
ROI.91	0	0	0	0	0	8.49478	42.3125	0	0	30.9889	0	49.6317	4.02082	0	0
ROI.92	42.4582	0	14.822	0	35.7074	17.7149	13.5753	39.4936	32.4912	18.0242	13.2549	101.127	120.147	74.4977	31.887
ROI.93	0	42.2352	0	0	0	0	0	0	0	0	0	0	0	0	0
ROI.94	0	0	0	0	0	0	0	0	0	0	0	0	8.47744	0	23.2862
ROI.95	0	0	12.6711	0	0	0	0	0	0	0	0	14.2868	0	29.7067	0
ROI.96	0	0	0	0	0	0	0	13.2003	0	0	0	31.4542	0	0	0
ROI.97	0	0	0	0	0	0	0	0	0	0	0	0	0	0	0
ROI.98	0	0	0	0	0	0	0	0	0	0	0	0	0	8.7094	0
ROI.99	0	0	0	0	0	0	0	17.8489	0	0	0	0	0	0	0
ROI.100	0	0	0	0	0	8.45979	0	0	0	0	12.4686	0	0	0	39.0147
ROI.101	0	0	0	0	0	0	0	0	0	0	0	0	0	0	0
ROI.102	0	0	0	8.18816	28.2638	0	0	0	0	0	0	0	0	0	0
ROI.103	0	49.4161	53.1786	15.0389	32.1658	0	0	73.9515	115.005	100.68	101.789	105.709	68.5571	61.1336	187.965
ROI.104	0	0	0	0	23.2295	4.37011	0	12.768	0	0	0	4.25033	0	0	0
ROI.105	0	0	0	0	0	0	0	0	0	0	0	0	0	0	0
ROI.106	0	8.88901	0	4.1351	14.0741	0	17.7186	0	0	9.39576	0	28.2686	0	0	54.5751
ROI.107	0	0	0	0	0	0	8.51336	13.3284	0	0	0	0	0	0	0
ROI.108	18.8077	0	0	0	0	17.0766	0	44.7654	17.4882	0	0	4.00023	0	0	0
ROI.109	0	0	0	0	0	0	0	0	0	0	0	0	0	0	0
ROI.110	0	0	0	0	0	0	0	0	0	0	0	0	0	0	0
ROI.111	0	0	0	0	0	0	0	0	0	0	0	0	22.5645	0	0
ROI.112	0	0	0	0	0	0	0	0	0	0	0	0	0	0	0
ROI.113	25.0582	40.2913	42.8127	20.8078	25.7594	67.4261	28.1871	52.2083	30.873	32.4702	55.0202	31.1719	26.2926	30.9949	38.4805
ROI.114	109.004	329.844	193.563	249.994	336.128	330.505	336.594	383.336	359.494	349.952	376.775	327.892	321.228	330.025	379.324
ROI.115	29.2563	44.2885	4.58431	23.9557	30.6612	38.2807	45.5693	72.7326	41.9903	24.0114	36.3621	35.3336	30.426	38.5784	72.9698
ROI.116	0	0	0	0	0	0	0	0	0	0	0	0	0	0	0
ROI.117	0	98.8765	24.03	32.5921	32.2627	24.205	21.6909	0	22.8593	26.0719	4.66911	103.957	14.331	49.4047	31.5479
ROI.118	175.322	288.527	0	0	131.22	181.374	194.063	197.548	0	71.7159	0	139.517	47.3875	432.73	0
ROI.119	117.988	297.96	392.505	371.806	392.222	514.613	509.415	641.449	541.081	414.254	442.553	526.502	561.015	573.032	662.146
ROI.120	22.9118	30.9249	4.13525	8.2238	96.6908	126.738	98.8588	161.578	75.4042	80.645	46.3822	87.8922	111.403	128.237	151.292
ROI.121	48.8667	16.178	88.4135	89.9544	83.0579	151.904	93.4364	183.731	131.925	65.7142	118.686	181.549	132.756	233.865	171.003
ROI.122	0	0	0	16.6494	0	0	0	0	0	0	0	0	0	0	0
ROI.123	0	0	0	0	0	0	0	0	4.1458	0	0	0	8.3037	23.1651	12.804
ROI.124	0	0	0	0	0	0	0	0	0	8.59271	0	0	0	0	0
ROI.125	0	0	0	0	0	0	0	0	0	0	0	0	0	13.7459	0
ROI.126	0	0	0	0	0	0	0	0	0	0	0	0	0	0	0
ROI.127	0	0	0	0	0	0	0	0	0	0	0	0	0	0	0
ROI.128	0	0	0	0	0	0	0	0	0	0	0	0	0	0	15.5775
ROI.129	0	0	0	0	0	0	0	0	0	0	0	0	0	0	23.058
ROI.130	0	0	0	0	0	0	0	29.9939	0	26.5872	0	0	0	10.2047	54.0098
ROI.131	0	0	0	0	0	0	0	0	0	0	0	27.2946	0	0	0
ROI.132	0	0	0	0	0	0	0	0	0	0	0	30.9138	0	0	0
ROI.133	124.411	379.791	210.811	259.007	372.056	361.602	404.184	358.236	274.634	356.299	380.559	404.689	346.489	293.346	393.992
ROI.134	5.25518	56.3387	76.3656	43.6374	44.4547	31.1543	54.7793	30.2478	82.6897	33.836	56.8084	37.7369	23.1559	9.6589	40.0065
ROI.135	159.005	126.963	24.817	67.4841	168.674	174.939	145.655	233.372	127.574	173.911	156.885	180.87	160.874	211.368	76.5208
	Herbivore
ROI No.	1	2	3	4	5	6	7	8	9	10	11	12	13	14	15
ROI.1	553.218	542.057	987.497	532.656	1047.66	941.129	924.212	1285.83	652.681	445.982	682.373	480.083	553.402	1062.33	464.711
ROI.2	175.239	214.159	449.889	254.317	64.061	411.908	234.289	249.156	221.042	263.667	573.721	480.97	259.313	197.034	289.65
ROI.3	183.62	280.679	500.837	271.313	553.362	493.08	463.656	648.723	334.572	186.385	363.664	246.296	364.031	584.682	242.731
ROI.4	185.655	447.471	642.316	341.929	619.161	583.261	442.885	873.47	734.32	456.838	668.92	492.269	548.751	779.888	428.245
ROI.5	380.531	658.419	985.44	788.573	865.79	1114.95	724.628	1110.92	805.986	618.748	979.006	650.375	759.631	1097.62	760.795
ROI.6	284.405	564.515	949.93	630.026	807.407	1024.03	691.407	1305.64	850.093	606.918	1148.95	599.593	973.023	1214.39	746.287
ROI.7	348.168	621.555	578.457	700.93	674.762	560.403	525.82	699.883	520.876	484.034	772.229	693.118	903.692	823.427	640.74
ROI.8	53.0476	188.941	188.746	179.517	270.326	165.931	184.41	289.114	268.616	151.77	221.936	168.653	239.181	269.298	178.927
ROI.9	180.891	102.771	44.9974	109.731	90.5156	49.8817	40.009	34.3825	59.1125	0	0	0	0	20.5674	8.83839
ROI.10	190.155	253.817	216.446	317.732	458.028	251.53	256.845	400.328	267.99	207.298	276.781	243.147	353.138	371.29	238.132
ROI.11	148.508	384.332	552.013	309.966	446.061	432.336	372.757	655.87	569.933	377.74	575.607	379.732	492.381	708.426	403.284
ROI.12	263.867	347.576	714.24	500.299	936.907	666.919	694.014	1039.48	587.351	243.542	469.302	413.834	461.032	800.218	408.352
ROI.13	274.25	281.518	477.037	329.943	664.164	413.22	520.671	681.675	430.835	220.416	443.802	310.164	278.551	619.324	286.03
ROI.14	312.459	443.583	699.734	456.672	885.245	666.02	726.812	989.247	596.608	389.102	594.062	432.932	480.417	840.477	457.322
ROI.15	481.015	619.622	1109.54	645.581	1114.83	1055.08	1083.4	1399.61	893.927	556.23	838.722	622.388	732.536	1330.89	662.707
ROI.16	726.399	1340.47	1813.2	1217.9	1786.92	1647.84	1423.64	2378.13	1851.01	1302.69	1948.7	1300.81	1809.18	2212.32	1380.85
ROI.17	306.352	434.397	619.643	466.709	711.18	580.841	599.113	886.704	682.555	483.271	720.156	457.505	750.334	834.322	581.244
ROI.18	27.7347	215.954	357.759	61.5778	228.826	357.039	225.358	842.341	321.74	143.213	447.091	110.526	304.61	470.464	134.311
ROI.19	8.37583	161.233	146.455	124.623	162.674	157.465	53.8179	192.652	106.231	28.0173	197.222	70.714	133.535	220.343	125.625
ROI.20	8.30309	92.986	76.3153	119.795	169.343	158.377	68.0538	171.587	91.9126	54.5154	171.67	145.799	177.433	187.527	105.049
ROI.21	4.02003	105.129	135.406	82.188	73.0036	89.4962	93.1882	197.246	104.063	61.5236	129.037	72.9017	182.416	149.269	127.775
ROI.22	34.5236	212.846	242.687	226.133	364.374	152.687	208.017	333.017	285.827	159.976	233.81	232.144	265.039	316.664	207.512
ROI.23	0	92.1221	57.1002	57.7275	88.0252	68.0322	62.3062	97.8543	32.5536	37.9585	73.8895	82.409	91.6373	68.8086	70.7348
ROI.24	29.1578	353.004	217.426	401.297	675.881	255.286	395.063	452.683	556.955	525.645	474.394	642.279	962.359	503.886	730.527
ROI.25	1007.19	1932.03	1404.8	1976.01	2518.87	1609.79	1794.66	2576.65	2397.5	1879.68	1735.51	2064.53	3150.23	2574.7	2453.09
ROI.26	760.662	1139.22	938.298	1234.42	1629.99	1181.21	1228.14	2024.85	1444.16	1038.69	936.248	1214.63	1731.24	1843.85	1331.02
ROI.27	0	104.591	0	63.3402	48.3278	0	57.4433	42.9647	88.431	26.0456	0	72.6187	4.46022	0	69.2182
ROI.28	125.024	215.121	133.832	268.899	89.7725	234.079	188.654	0	117.633	105.875	113.48	160.044	210.483	111.572	207.517
ROI.29	78.0696	132.528	113.488	136.044	70.9031	179.491	134.745	0	106.073	121.4	68.0364	114.112	97.7373	78.0028	145.94
ROI.30	435.232	338.422	311.378	343.659	67.6712	174.104	202.778	68.5776	89.2431	86.1114	19.3344	75.0045	0	59.8203	116.249
ROI.31	502.242	889.939	1007.77	891.291	1112.22	1089.19	879.778	1340.04	1017.32	848.285	1216.69	1044.49	1291.13	1359	992.585
ROI.32	1231.35	1020.92	1717.36	917.181	1897.91	1630.49	1716.69	2301.28	1303.42	808.025	1196.98	828.096	1013.98	1970.31	894.777
ROI.33	0	79.7386	24.6713	30.8232	194.186	27.4582	8.3937	0	114.247	130.567	50.9207	160.15	327.163	114.128	217.343
ROI.34	120.052	169.622	294.378	175.862	320.162	291.666	260.806	393.35	232.158	166.824	217.052	196.569	276.366	405.687	230.959
ROI.35	0	360.306	195.493	351.377	492.955	141.397	289.042	112.56	588.183	542.095	349.138	581.2	1110.41	433.171	768.523
ROI.36	809.843	788.867	1314.81	773.828	1532.42	1204.22	1287	1893.44	1040.56	654.111	811.561	681.627	769.54	1457.34	741.526
ROI.37	123.924	281.079	247.666	300.263	454.233	298.827	299.825	613.769	363.167	236.707	260.403	293.535	462.727	472.456	326.196
ROI.38	121.643	455.954	398.661	609.716	837.605	325.171	543.073	389.867	807.639	641.128	570.057	759.693	1296.11	660.214	949.412
ROI.39	482.096	449.64	848.627	454.99	982.369	807.007	844.386	1144.76	644.079	415.574	584.461	418.904	552.978	965.229	494.988
ROI.40	0	169.753	78.6539	175.066	256.588	55.4581	131.962	67.7882	279.575	205.631	192.899	270.292	635.106	242.675	374.312
ROI.41	109.622	101.375	202.424	91.5711	262.034	225.362	214.682	301.084	175.128	115.141	172.971	124.989	177.134	295.466	137.349
ROI.42	978.233	1089.84	1871.03	1062.41	1939.57	1825.03	1823.72	2215.85	1278.31	909.528	1343.06	917.913	1097	2026.83	963.434
ROI.43	294.298	571.808	638.249	578.999	558.84	728.112	660.097	721.065	731.26	589.409	727.703	699.195	631.852	715.875	795.034
ROI.44	482.878	914.453	863.77	743.449	1563.06	746.515	896.737	1438.41	843.526	600.314	898.818	682.419	653.109	984.506	743.974
ROI.45	22.8406	41.0467	36.8458	45.1558	31.7676	78.4717	51.4683	99.4904	30.5611	8.63884	60.4994	41.2717	8.70243	41.8534	40.7776
ROI.46	179.583	332.98	341.281	381.67	582.046	327.916	293.992	628.836	353.421	290.015	336.465	324.871	488.502	545.003	298.703
ROI.47	204.304	301.193	279.136	262.071	541.12	295.069	320.45	610.067	285.262	232.798	285.954	264.412	422.627	490.522	322.942
ROI.48	0	41.7612	59.0753	63.8082	129.141	79.3735	47.0802	114.916	37.2355	28.9092	67.5212	86.4434	47.373	141.165	49.9238
ROI.49	112.228	206.564	301.868	154.111	238.054	245.254	221.335	328.282	285.049	186.512	265.167	147.909	272.682	294.881	283.354
ROI.50	186.669	361.32	448.922	253.673	322.757	379.929	296.526	657.126	460.033	266.42	546.853	291.353	439.851	581.117	338.179
ROI.51	239.021	368.83	543.876	334.029	507.943	472.63	370.883	744.249	521.381	330.137	499.789	336.572	486.472	727.422	369.11
ROI.52	135.716	383.494	482.389	356.395	674.609	440.311	417.452	814.602	591.679	320.569	642.673	376.625	619.844	759.836	463.75
ROI.53	179.708	290.909	420.331	240.535	437.801	387.303	343.544	596.501	511.681	329.957	487.874	344.773	408.65	549.359	315.67
ROI.54	203.653	389.03	561.177	364.22	552.577	515.454	380.175	791.515	579.511	376.181	538.269	427.855	512.787	648.69	418.355
ROI.55	0	91.5369	44.7897	58.7374	33.2024	8.97955	22.0555	29.1328	100.41	41.4745	0	59.9234	44.2489	17.8152	94.7538
ROI.56	413.241	622.791	727.038	643.859	1179.11	624.455	674.736	1225.49	767.661	591.659	730.193	583.811	930.108	1051.02	685.473
ROI.57	244.239	236.789	505.786	301.607	218.615	590.084	360.464	335.555	288.791	326.795	546.566	400.517	452.565	477.961	458.929
ROI.58	13.2836	60.1123	124.757	21.8429	111.471	69.7205	86.2488	133.72	146.304	92.2626	117.479	56.1626	81.954	143.644	96.1394
ROI.59	225.143	277.445	650.394	476.243	631.523	722.88	431.248	646.307	408.958	322.392	658.415	329.132	478.009	672.955	448.857
ROI.60	124.558	106.422	80.1717	85.3549	249.586	33.7991	68.8496	613.777	93.1204	21.9237	88.3191	19.0915	173.831	297.821	54.7725
ROI.61	155.767	273.699	342.749	281.172	301.914	411.201	316.398	546.613	383.866	259.814	475.861	281.849	410.055	548.005	364.998
ROI.62	516.404	637.227	970.339	725.667	731.8	1244.64	690.082	1180.66	875.149	662.546	922.431	736.594	827.414	1058.17	668.799
ROI.63	12.6587	32.241	121.73	25.8321	71.0265	88.8031	73.3624	141.02	119.047	50.291	151.458	78.3121	106.575	130.859	71.9264
ROI.64	4.23783	61.4312	56.3728	77.1891	105.48	79.8092	79.2036	117.489	60.215	56.2476	111.845	93.6227	91.6336	135.011	55.4537
ROI.65	156.263	251.724	306.903	261.556	480.298	269.239	310.152	543.438	348.578	229.102	292.454	299.607	392.228	455.957	267.824
ROI.66	518.145	954.04	1433.44	899.4	1216.85	1480.68	1086.05	1895.13	1368.43	914.829	1500.19	937.159	1257.67	1757.78	1168.82
ROI.67	58.6259	111.428	257.623	150.42	217.783	248.194	122.004	180.594	125.915	139.723	249.732	87.8513	132.752	148.966	262.657
ROI.68	9.23156	197.863	243.173	245.456	388.593	177.136	267.944	428.851	312.181	186.161	344.343	307.122	413.777	452.695	302.824
ROI.69	82.0512	260.353	364.85	216.229	354.863	313.877	278.676	449.728	387.862	270.994	432.1	307.337	315.566	483.509	270.956
ROI.70	65.5152	196.867	238.613	179.307	251.846	251.08	212.021	422.278	290.304	154.128	342.956	197.424	227.917	329.922	212.71
ROI.71	0	0	86.9544	0	0	12.3814	0	4.05029	0	0	170.714	0	4.22042	14.4861	0
ROI.72	0	22.4957	85.5011	8.12004	33.0784	92.8731	41.4614	70.5	51.6482	24.2024	143.043	58.0367	137.604	165.527	0
ROI.73	18.0891	20.2225	72.6746	128.527	181.614	36.7521	200.157	0	75.7712	17.6283	0	61.3247	0	0	65.6834
ROI.74	4.15376	0	82.6139	0	0	99.7659	0	0	0	0	42.9487	0	0	0	0
ROI.75	0	0	108.377	4.40597	0	173.233	0	176.84	0	0	128.139	8.61334	89.0695	105.758	0
ROI.76	122.957	189.76	99.1674	211.409	477.739	27.5229	273.594	261.564	183.823	42.9872	13.5396	105.561	82.4545	78.4029	127.067
ROI.77	0	24.3347	92.9461	18.9999	89.9785	63.0854	46.4204	144.311	119.11	36.957	148.114	13.57	67.2712	125.135	56.1332
ROI.78	0	0	34.7618	99.4192	35.5893	8.55106	42.9306	62.1207	57.0216	0	0	0	36.2917	23.1706	4.05402
ROI.79	0	0	46.0341	60.9	0	17.0559	36.2448	13.4802	0	8.2991	85.4314	33.1649	34.0371	30.8286	25.7519
ROI.80	58.8854	8.2941	0	0	63.6981	0	4.10112	32.8964	0	0	0	0	0	0	0
ROI.81	25.2316	0	0	47.0453	144.018	0	50.7086	98.4056	48.7959	0	0	0	0	30.043	25.2531
ROI.82	0	4.09278	0	0	43.3497	30.0206	46.4287	56.6853	0	0	41.1605	0	72.439	76.0553	0
ROI.83	0	0	0	8.48998	67.2678	23.2927	8.76469	38.2581	33.3801	0	22.9031	0	0	13.9185	0
ROI.84	24.3552	42.7852	182.092	80.4206	114.578	169.521	92.698	204.792	124.573	53.6102	180.695	106.123	155.44	235.715	119.622
ROI.85	0	0	4.02348	0	119.618	0	8.70289	46.3192	0	0	23.5451	28.7394	47.5761	58.47	28.2284
ROI.86	58.8431	25.8209	0	0	271.512	8.37885	19.2376	483.794	0	4.75625	46.8973	0	62.5365	192.638	4.02934
ROI.87	0	30.7131	26.2552	0	39.3677	93.4501	22.0152	137.234	82.8459	0	103.565	79.1648	98.9247	118.828	34.0952
ROI.88	102.895	74.2213	49.4873	117.245	225.523	18.4222	138.667	148.201	70.6356	8.54915	29.5729	16.6367	4.60066	49.0955	25.6836
ROI.89	0	0	0	0	0	0	38.6681	176.867	27.6106	0	0	0	114.493	86.4627	0
ROI.90	0	0	0	0	0	0	0	86.1686	0	0	0	0	78.2608	99.5011	0
ROI.91	0	0	67.3187	0	0	4.32733	0	60.4307	0	0	296.188	0	65.3116	90.6768	0
ROI.92	0	0	4.22352	0	0	53.9797	4.34863	130.698	0	0	73.6615	13.7662	12.6283	105.91	13.102
ROI.93	0	0	0	0	0	0	0	116.101	67.1483	0	52.3733	17.69	0	59.9908	32.1672
ROI.94	0	0	0	0	0	0	0	69.2252	0	0	4.04437	0	21.657	14.1634	0
ROI.95	0	0	32.9014	0	0	31.4544	0	58.6281	12.363	0	39.2352	0	8.86467	28.6596	0
ROI.96	0	0	0	0	0	0	0	61.2844	0	0	0	0	0	16.9367	0
ROI.97	0	0	0	0	0	0	0	48.0977	0	0	0	0	0	22.5429	0
ROI.98	0	0	8.22397	0	0	0	0	111.632	54.6359	4.11965	37.9436	0	39.5327	35.6132	13.558
ROI.99	0	0	0	0	0	0	0	62.5527	0	0	17.4474	0	0	0	0
ROI.100	0	38.4074	0	4.18178	25.677	0	0	8.84106	55.1586	65.3346	0	33.6455	0	0	60.7031
ROI.101	0	0	0	0	0	0	0	4.06459	0	0	104.942	0	0	0	0
ROI.102	0	8.82554	49.3548	0	0	0	0	30.5347	0	0	202.119	0	13.0719	35.3702	0
ROI.103	0	31.963	19.8796	0	4.42817	4.3291	49.6089	53.1621	62.3413	92.3749	170.171	178.195	102.881	105.465	152.48
ROI.104	0	0	24.5811	0	0	4.01363	0	62.1034	0	0	115.359	0	0	92.3537	8.23982
ROI.105	0	0	0	0	0	0	0	0	0	0	44.5759	0	0	0	0
ROI.106	0	0	0	39.3469	21.6177	52.7489	0	18.9117	0	0	43.8219	21.8198	27.2706	80.6169	4.31872
ROI.107	0	0	0	0	0	0	0	13.6306	4.03735	0	0	0	54.6766	14.8506	0
ROI.108	18.6112	28.598	37.8781	28.3984	36.8796	52.202	12.0313	67.2384	20.1258	4.28846	18.9441	0	37.5287	77.7575	37.0514
ROI.109	0	0	0	0	4.57196	0	0	0	53.3872	0	0	18.1511	47.2301	8.46876	0
ROI.110	0	0	0	0	0	0	0	0	0	0	0	0	4.15672	27.9206	4.08612
ROI.111	0	110.739	45.9729	132.776	183.114	0	82.0607	152.6	154.9	87.1791	74.6473	96.6385	242.169	74.2775	191.801
ROI.112	0	0	0	51.1367	30.9185	0	53.6736	12.5113	42.9213	8.38766	0	48.5871	0	0	66.823
ROI.113	4.32804	27.2858	47.6437	38.3407	38.4449	56.1592	15.8946	42.1776	30.2353	48.4223	52.2779	47.7737	80.6929	58.544	46.1595
ROI.114	374.817	665.828	542.006	684.444	665.076	694.01	620.394	771.582	707.822	544.659	591.081	574.059	790.494	802.465	697.393
ROI.115	12.9448	53.5235	79.7031	62.6211	115.338	53.7258	49.591	112.027	93.9941	46.6635	49.8571	51.374	91.3202	82.9331	73.595
ROI.116	0	0	23.3297	4.18516	104.444	0	0	82.0082	35.6025	0	0	0	0	0	0
ROI.117	124.988	254.372	279.436	271.113	365.612	317.533	310.445	282.016	247.976	229.622	255.143	192.8	284.543	338.531	271.805
ROI.118	1295.53	954.302	1961.44	910.391	1718.58	1726.53	1644.22	2341.1	1393.2	877.06	1382.63	850.257	1128.05	2161.19	958.453
ROI.119	203.96	510.51	825.335	581.359	666.221	824.556	653.533	1037.87	832.429	602.515	950.277	661.324	869.684	1010.8	857.512
ROI.120	64.3251	22.6829	30.3645	31.9945	157.159	28.2981	47.8591	319.997	15.3559	0	60.5373	0	121.74	190.717	21.1141
ROI.121	93.1239	151.237	238.815	144.405	230.534	206.377	177.595	307.059	262.026	188.04	271.905	194.904	205.3	314.052	181.042
ROI.122	0	0	21.6588	0	0	78.3211	0	0	0	0	44.6246	0	0	0	0
ROI.123	0	0	4.32073	0	37.6754	12.581	0	0	0	0	35.5943	0	9.59905	4.23363	0
ROI.124	0	0	24.9209	0	27.6137	0	8.70212	4.46182	0	0	0	0	0	0	0
ROI.125	0	0	8.37156	8.7369	0	0	0	24.0956	35.9305	0	36.3245	0	0	18.1794	26.4631
ROI.126	0	0	0	0	0	4.071	0	0	0	0	36.3228	14.8953	23.2927	18.2909	0
ROI.127	0	0	0	0	22.5593	0	0	4.01064	0	0	41.2062	4.1948	14.0357	43.1102	0
ROI.128	0	0	0	0	0	0	0	0	0	0	0	0	0	0	0
ROI.129	0	0	0	0	0	0	0	0	0	0	0	0	0	0	0
ROI.130	0	0	0	13.4464	0	0	4.11019	0	0	8.42332	0	0	0	31.9079	0
ROI.131	0	0	0	0	0	0	0	0	0	0	0	0	0	0	0
ROI.132	0	0	0	0	0	0	0	8.39112	0	0	0	0	0	0	0
ROI.133	298.74	651.653	474.716	678.972	695.943	584.939	617.876	444.029	591.181	560.227	445.356	558.752	738.12	549.917	678.799
ROI.134	92.6401	160.341	112.564	135.972	108.898	166.289	102.492	71.9213	96.3972	102.362	115.978	98.0314	112.592	104.4	132.18
ROI.135	143.074	208.175	149.931	201.256	276.792	212.784	217.319	306.776	285.434	206.465	199.115	259.501	297.435	339.532	286.753
