# Supplementary material for: Cannibalism Affects Core Metabolic Processes in Helicoverpa armigera Larvae—A 2D NMR Metabolomics Study
Source: Int J Mol Sci. 2016 Sep 2;17(9):1470. doi: 10.3390/ijms17091470 (PMC5037748; doi:10.3390/ijms17091470)
Supplement: Supplementary file 1 [file ijms-17-01470-s001.zip › ijms-131501-Supplementary Materials/Table S3.xlsx]

## Sheet: Proton_bins
Samples	Class	9.99	9.97	9.95	9.93	9.91	9.89	9.87	9.85	9.83	9.81	9.79	9.77	9.75	9.73	9.71	9.69	9.67	9.65	9.63	9.61	9.59	9.57	9.55	9.53	9.51	9.49	9.47	9.45	9.43	9.41	9.39	9.37	9.35	9.33	9.31	9.29	9.27	9.25	9.23	9.21	9.19	9.17	9.15	9.13	9.11	9.09	9.07	9.05
H1	1	1.04481e+06	1.09364e+06	1.01949e+06	1.03519e+06	1.09316e+06	1.09365e+06	1.09051e+06	1.10231e+06	1.07974e+06	1.1265e+06	1.12585e+06	1.09959e+06	1.13022e+06	1.11072e+06	1.12036e+06	1.14737e+06	1.09221e+06	1.1203e+06	1.18521e+06	1.17236e+06	1.30134e+06	1.16089e+06	1.15365e+06	1.15696e+06	1.16799e+06	1.1886e+06	1.24268e+06	1.17981e+06	1.25661e+06	1.21062e+06	1.31027e+06	1.25882e+06	1.30621e+06	1.30294e+06	1.31206e+06	1.29858e+06	1.27944e+06	1.31895e+06	1.32506e+06	1.29383e+06	1.32509e+06	1.31547e+06	1.29312e+06	1.53265e+06	1.35896e+06	1.33633e+06	1.32031e+06	1.32048e+06
H2	1	1.56192e+06	1.66175e+06	1.61094e+06	1.6584e+06	1.62778e+06	1.63084e+06	1.69344e+06	1.6055e+06	1.61894e+06	1.69306e+06	1.69885e+06	1.65358e+06	1.69514e+06	1.62771e+06	1.6682e+06	1.68851e+06	1.70708e+06	1.6834e+06	1.73713e+06	1.74312e+06	1.86995e+06	1.7365e+06	1.72253e+06	1717041	1.77309e+06	1.74252e+06	1752002	1.78417e+06	1.83805e+06	1.83094e+06	1.89816e+06	1.84551e+06	1.86494e+06	1.81289e+06	1.84869e+06	1.83246e+06	1.8376e+06	1.93706e+06	1.86857e+06	1.84232e+06	1.84921e+06	1.87811e+06	1.89103e+06	2.02716e+06	1.91325e+06	1.87328e+06	1.91763e+06	1.92343e+06
H3	1	14835	40782.7	-32454.8	9198.47	-11968.1	53458	13066.7	49649	-40226.3	21664.6	26976.9	-33901.1	18684	14524.5	4930.96	47015.1	40984.1	36706.8	61270.5	31946.5	199647	24636.5	59191.6	47088.7	90557.8	71524.2	77732.3	119649	108631	113683	265021	179715	210285	274860	145834	145109	152282	215758	208031	197763	150422	199878	194137	273298	216248	201937	243181	180866
H4	1	22163.8	96885.4	68854	1244.85	45078	78469.9	47321.7	63820.2	68775.4	18912.3	61124.3	82524.8	62377.2	45609.7	102038	71190.8	68223.4	106471	95380.1	95358.4	233494	135042	118584	66899.2	139500	109027	140304	73467.6	155796	120907	185198	189639	236220	227224	157119	156781	153979	218194	227744	215184	204649	211400	226239	424454	272000	216265	181126	204164
H5	1	-90210.5	-84520.5	-45996.7	-96537.7	-51638.9	-76787.9	-105698	-28897.6	-75442.7	-82009.6	-53729.5	-60450	-11761.2	-44507.9	-53826.3	-54295.3	-2850.12	-82225.5	-26887.4	-57137.3	-13249.7	43227.9	-31087.4	-2651	-49596.9	-5289.93	29153.8	-8556.84	-18171.3	50691.2	-31412.9	-12863.8	17692.8	26743.7	44528	51282	46865.4	104132	47008.9	32009.1	70879.6	93605.8	85231.7	245231	157144	58882.8	78261.3	54461.8
H6	1	17502.2	27029.7	15937.2	-23713	2521.77	27087.3	17842.2	8011.15	8313.91	18237.4	-11164.5	47600.8	25458.7	-10246.6	16094.6	29153.2	48693	35354.2	51728.8	78991.6	164572	118212	95480.7	47005.4	80415	143126	76140.2	136260	86350.2	170174	243256	113670	166412	207513	183496	115653	149959	211578	193979	205267	220267	175038	184709	247302	235367	220290	225486	201615
H7	1	89938	42423.1	72327.8	115837	40971.8	64933.1	81530.9	74607.3	77513.2	91058.9	136706	60723.2	32889.5	117491	103478	145436	131768	122360	155214	154090	260002	129640	140896	130466	198771	173525	127142	173587	182485	151565	200330	151461	251040	272125	232312	256898	196825	197753	260449	250010	212270	261164	285784	388133	263751	184017	244781	229551
H8	1	-137046	-81018.5	-74820.1	-62068.9	-77346.8	-64508.3	-88285.8	-69868.9	-115888	-74203.1	-85367.5	-100507	-131121	-91779.5	-46543	-62215.1	-64724.2	-46511	-64155.4	-3211.28	-4376.97	-4290.14	-47792.2	-75462.8	-29192.5	-42392.2	12926	-3894.63	-30153.8	12882.5	22026.2	104597	20984.8	17087.9	35701.3	17741.8	36955.1	20580.3	44821.2	38735.2	88630.1	85128.2	93343.3	106891	40954.3	68656.6	96471.9	91318.7
H9	1	112863	38892	53089.2	83480	79099.3	86286.2	116289	93874.6	91415.7	51530.1	62721.8	124389	110629	156449	107305	57344.6	111883	164180	186504	175170	183320	148982	174295	184740	152572	192048	228130	144386	170685	150179	191328	248022	187245	242566	188531	224583	184443	200537	247520	244593	237721	264028	290590	353694	375166	226956	271779	259480
H10	1	49301	13108.9	18275.6	22310.8	14790.8	35368	-11856.7	19957.3	40942.2	68100.9	20752.4	65190	47937.2	62068.6	34482.4	19803.2	30276.4	31632.3	48104.6	113246	113585	79620	95636.5	94147.2	87140.5	79901.7	79368.1	88408.7	87398.7	111319	99436.3	130404	118053	157734	126970	123891	112326	158226	156816	159833	144250	176825	112151	235631	208480	180244	160189	151149
H11	1	134312	115354	149289	132838	142418	141889	159601	124304	116109	168618	188228	145563	150674	165729	190393	169754	193542	203118	207522	238522	298386	261799	237513	219965	196299	238734	269210	296885	292374	261729	381681	323393	326041	399411	313739	340483	298451	356503	356632	326109	327459	364678	300251	400379	386733	394238	410099	360939
H12	1	18952.3	34800.5	-3802.47	-24146.4	-16411	-24738.6	39786	48489.9	21716.2	2249.06	10176.5	-115.8	31614.2	-2623.7	-811.75	-18877.2	19266.6	77825.4	22175.7	28061.4	184623	5796.18	30500	51307.2	64273.7	70500.4	29832.6	112054	82754.4	104546	150352	112021	150401	161658	99044.7	109603	76674.1	99937.7	105586	168994	111059	159593	99159.8	332526	209189	177813	122435	139631
H13	1	-49017.4	-52711.7	-27218.9	-112677	-79450.1	-21015	-5527.01	-30781.5	-2637.15	-51948.9	-42180.2	-76952	-24931.1	-41433.6	-21371.3	-26967.7	15100.4	-7537.7	-26257	5098.58	133065	16437.8	-8350.29	14350.1	30338.1	8981.06	34529.5	39099	23119.7	69266.6	42400.8	85019.5	103807	176619	111337	85623.4	104758	142387	117973	100381	134407	95375.1	151386	162778	128588	125298	120835	126711
H14	1	-52851.8	-75646.8	-51441.1	-38393	-76330.4	-90699.7	-55208.7	-45840.7	-89961.1	-104797	-79520.5	-61412	-38777.2	-70112	-74591.1	-25071	-25867.1	-19163.6	-54423.9	22628.5	55928.2	52097	-43033.9	-56563	-74329.1	15617.8	1321.11	9190.8	-30683.7	30385.2	101609	49396.3	71858.2	71698.9	46424.3	90193.3	47286.3	98525.3	27412	46046.3	61314	65745.1	65216	131899	105373	88905.9	97270.3	128786
H15	1	58746.3	118616	83305.4	93708.9	114498	78570	117500	99001.8	141065	85237.4	147699	108040	157015	132470	159248	136407	124827	115020	116684	112572	235223	150013	140681	179264	168120	203294	153023	167359	203922	162575	332839	238601	284698	369110	195025	225261	235074	293792	301699	263346	248259	272992	287748	337628	368108	271003	267551	298320
C1	2	86924.6	-7680.81	69122.8	51578.5	82218.8	70534.5	62558.1	55449.5	35930.3	40494.7	49148.3	56112.9	54301.9	81996.1	98500.9	61831.9	88811.9	105263	81893.8	129659	155003	138776	91568.4	91438.8	107284	108624	148544	128776	205561	113996	162342	175796	152935	173498	143264	199677	171408	165618	137501	163429	138923	141649	129718	190730	146639	216774	186739	182902
C2	2	28799.8	126061	118608	112243	91587.1	65583.5	91923.6	116310	126977	79272.6	122993	106011	61946.9	103138	103377	113241	100177	147437	106136	129638	193184	144169	153887	114966	164372	131261	120132	135713	146879	105098	161132	182402	183512	189859	206863	125311	149407	198942	139885	224941	205454	222508	213239	186871	169978	178267	250055	169371
C3	2	35846.6	52525.9	35446.8	73725.2	44084.3	54251.1	77630.9	48359.7	38793.9	49379.2	80394.9	31428.4	45248	28207.1	43153.5	101152	73418.9	67997.5	94947	121055	193449	61056.1	30883.4	144005	78876.2	102967	145775	111451	71214.7	168074	191244	114994	160010	234569	148169	152503	122509	187130	217405	132595	167373	140620	146494	164759	144622	189079	188913	135616
C4	2	34700.5	65140.9	20099.5	53667.2	43366.9	39854.2	58722.8	69525.7	14121.1	49557.6	27341.9	90958.2	110661	71701.6	55695.6	50980.5	76696.9	42313.2	107029	80727.5	198648	81895.3	72614	74127.8	78138.9	122680	70413.8	72068	118136	121101	183416	136340	183767	198523	157751	190874	123895	194468	178283	109688	171754	182792	142343	191339	140667	138811	194696	136380
C5	2	34517.2	35547.8	16796.6	15587	37579.2	18990.2	6886.83	32337.7	16417.4	44960.7	-30632.1	5331.8	69089.3	16380.9	35774	77395.9	40969.2	58272.2	55885.7	62243.5	89275.7	76798.9	61375.7	15938.9	86446.5	36795.4	110505	68010.2	48505.1	53812.2	73650.4	109454	144215	108823	110505	96180.5	80882.9	140330	66153.7	116108	117994	72765.3	97344.4	111516	90582.5	101171	124264	103736
C6	2	90211.5	106515	111066	66925.6	32533.9	56043.6	85446.6	105123	110924	108183	87264.5	60013.8	80939.1	96128.4	88757.4	115963	112065	114502	94595.9	89631.4	192300	122024	135240	129174	131760	119342	139110	149597	127965	179593	207326	166996	154395	161348	133749	181470	119396	129826	201717	151033	128820	169977	190941	155647	158986	166821	176852	182154
C7	2	40092.5	-7759.2	33088.7	-4355.65	24679.8	21512.5	62125.1	-370.8	7996.86	36406.1	21789.2	1442.85	5210.39	21746.8	56252.5	2326.99	59761.8	40566.1	78359	56734.6	76968.3	53415.8	60228.7	62220.9	97436.4	63338.8	73272.4	64382	66165.1	137860	121645	89939.3	121011	146602	115911	147621	135730	100040	97741.8	75849.1	137105	159963	141455	147271	98163.4	130046	64555.2	153823
C8	2	-5756.15	69115	42189.8	15479	15512	58212	13982.2	117373	84974	-743.72	52831	18735	24561.2	54650.6	47484.7	4848.01	66627.8	49176.2	16862.8	110210	90815.8	33656.6	77855.5	93225.4	69322.1	130457	23307.9	48574.3	155077	132897	85090.9	129601	90569	159719	99852	118652	106350	56416.7	120750	101098	162797	58374.3	90279.4	92661.5	96884.1	143982	113376	131701
C9	2	57778.5	11894.6	25360.9	73642.8	49052.6	63658.9	9914.9	56295.9	45163.7	32942.9	35433.3	74445.3	23207.9	51337.5	83666.7	82687	44762.4	49276	108056	58982.8	107918	91888.1	81749.8	77510.6	108428	107618	120189	120484	72716.8	108312	116768	93454.9	170950	166054	115440	139358	112809	186039	161541	117146	135009	113281	129860	158037	154680	146197	141477	136120
C10	2	72508.9	56188.3	103634	69068.9	78064.4	114898	89182.1	47545.2	76600	115176	70703.9	96146.3	126068	122882	70985.8	137094	108981	110137	103072	130402	158823	92367.7	145914	111552	97505.8	181303	128621	120908	178038	113354	153020	154380	204994	192746	164602	151982	158364	175405	218240	169561	162081	191921	181416	212003	177457	187951	201811	154590
C11	2	57345.2	51061.1	58649.8	72605	105857	15931.8	51594.6	66154	52942.1	25143.9	20726.9	62137	68973.8	69861.1	12993.4	103738	53628.2	27537.8	114581	91633.9	206244	98823.3	61755.1	127553	92605.8	87899.4	110025	122456	107839	138360	140742	127411	195637	213789	116186	202030	148634	170972	186256	179524	143288	178895	158382	141543	153074	191318	199401	143753
C12	2	50258	23913.2	1781.1	-49469.6	59086.8	5255.19	-6323.31	-1568.74	52223.7	57411.8	49455	63427.8	16193	55953.2	70622.9	23982.7	40859.1	83696.4	34134.5	44509.1	90877.6	93069.7	34532.5	57064.3	58433.9	123496	37696.4	41430.5	106653	113423	152246	99985.9	109870	174596	35207.8	108350	145997	78049.6	118066	91158.4	98985.2	141333	83758.6	139340	125970	155920	121238	100303
C13	2	17303.8	69133.4	50084.2	33600.7	97405.9	67832.9	26016	30805	489.61	130511	63208	38758.3	80174.7	57025.4	68712.8	77687.8	52414.1	72681.2	86981.6	90105.1	163456	79149.9	87081.5	56418.5	88705.9	86367.4	121734	102282	138121	104368	131708	123918	186219	139120	93568.6	126144	136594	148201	167107	105755	168186	142643	146188	144656	99184.6	140884	176748	126900
C14	2	57591	53884.8	96616.9	83595.7	55396.3	109810	49670.4	83332.9	69871.3	74193	75560.6	25159.5	88197.4	111034	85815	95451.1	81050.9	107509	108886	90527.2	110525	49599	98855.5	129596	130269	129969	151506	92894.6	141387	93974.9	149774	133554	125476	190444	138001	180917	125207	118265	177566	150864	210900	133333	170482	158782	147401	183450	188235	140156
C15	2	27411.1	92841.6	79354.1	27967.6	118016	65656.5	81023.6	83721.1	90730.4	101107	86391.5	121198	73745.1	95841.8	66979.8	61750.8	96722.2	118769	161838	104298	208950	134752	63404.4	116516	146771	130629	111092	156751	132807	147249	249399	125104	201782	201050	182449	183202	132949	174335	215901	197019	222501	174226	213320	205439	234363	209601	253574	164741
[truncated: 407 more columns]

## Sheet: ver1
Bin	Cannibal																Herbivore
(ppm)	1	2	3	4	5	6	7	8	9	10	11	12	13	14	15		1	2	3	4	5	6	7	8	9	10	11	12	13	14	15
9.99	86924.6	28799.8	35846.6	34700.5	34517.2	90211.5	40092.5	-5756.15	57778.5	72508.9	57345.2	50258	17303.8	57591	27411.1		1.04481e+06	1.56192e+06	14835	22163.8	-90210.5	17502.2	89938	-137046	112863	49301	134312	18952.3	-49017.4	-52851.8	58746.3
9.97	-7680.81	126061	52525.9	65140.9	35547.8	106515	-7759.2	69115	11894.6	56188.3	51061.1	23913.2	69133.4	53884.8	92841.6		1.09364e+06	1.66175e+06	40782.7	96885.4	-84520.5	27029.7	42423.1	-81018.5	38892	13108.9	115354	34800.5	-52711.7	-75646.8	118616
9.95	69122.8	118608	35446.8	20099.5	16796.6	111066	33088.7	42189.8	25360.9	103634	58649.8	1781.1	50084.2	96616.9	79354.1		1.01949e+06	1.61094e+06	-32454.8	68854	-45996.7	15937.2	72327.8	-74820.1	53089.2	18275.6	149289	-3802.47	-27218.9	-51441.1	83305.4
9.93	51578.5	112243	73725.2	53667.2	15587	66925.6	-4355.65	15479	73642.8	69068.9	72605	-49469.6	33600.7	83595.7	27967.6		1.03519e+06	1.6584e+06	9198.47	1244.85	-96537.7	-23713	115837	-62068.9	83480	22310.8	132838	-24146.4	-112677	-38393	93708.9
9.91	82218.8	91587.1	44084.3	43366.9	37579.2	32533.9	24679.8	15512	49052.6	78064.4	105857	59086.8	97405.9	55396.3	118016		1.09316e+06	1.62778e+06	-11968.1	45078	-51638.9	2521.77	40971.8	-77346.8	79099.3	14790.8	142418	-16411	-79450.1	-76330.4	114498
9.89	70534.5	65583.5	54251.1	39854.2	18990.2	56043.6	21512.5	58212	63658.9	114898	15931.8	5255.19	67832.9	109810	65656.5		1.09365e+06	1.63084e+06	53458	78469.9	-76787.9	27087.3	64933.1	-64508.3	86286.2	35368	141889	-24738.6	-21015	-90699.7	78570
9.87	62558.1	91923.6	77630.9	58722.8	6886.83	85446.6	62125.1	13982.2	9914.9	89182.1	51594.6	-6323.31	26016	49670.4	81023.6		1.09051e+06	1.69344e+06	13066.7	47321.7	-105698	17842.2	81530.9	-88285.8	116289	-11856.7	159601	39786	-5527.01	-55208.7	117500
9.85	55449.5	116310	48359.7	69525.7	32337.7	105123	-370.8	117373	56295.9	47545.2	66154	-1568.74	30805	83332.9	83721.1		1.10231e+06	1.6055e+06	49649	63820.2	-28897.6	8011.15	74607.3	-69868.9	93874.6	19957.3	124304	48489.9	-30781.5	-45840.7	99001.8
9.83	35930.3	126977	38793.9	14121.1	16417.4	110924	7996.86	84974	45163.7	76600	52942.1	52223.7	489.61	69871.3	90730.4		1.07974e+06	1.61894e+06	-40226.3	68775.4	-75442.7	8313.91	77513.2	-115888	91415.7	40942.2	116109	21716.2	-2637.15	-89961.1	141065
9.81	40494.7	79272.6	49379.2	49557.6	44960.7	108183	36406.1	-743.72	32942.9	115176	25143.9	57411.8	130511	74193	101107		1.1265e+06	1.69306e+06	21664.6	18912.3	-82009.6	18237.4	91058.9	-74203.1	51530.1	68100.9	168618	2249.06	-51948.9	-104797	85237.4
9.79	49148.3	122993	80394.9	27341.9	-30632.1	87264.5	21789.2	52831	35433.3	70703.9	20726.9	49455	63208	75560.6	86391.5		1.12585e+06	1.69885e+06	26976.9	61124.3	-53729.5	-11164.5	136706	-85367.5	62721.8	20752.4	188228	10176.5	-42180.2	-79520.5	147699
9.77	56112.9	106011	31428.4	90958.2	5331.8	60013.8	1442.85	18735	74445.3	96146.3	62137	63427.8	38758.3	25159.5	121198		1.09959e+06	1.65358e+06	-33901.1	82524.8	-60450	47600.8	60723.2	-100507	124389	65190	145563	-115.8	-76952	-61412	108040
9.75	54301.9	61946.9	45248	110661	69089.3	80939.1	5210.39	24561.2	23207.9	126068	68973.8	16193	80174.7	88197.4	73745.1		1.13022e+06	1.69514e+06	18684	62377.2	-11761.2	25458.7	32889.5	-131121	110629	47937.2	150674	31614.2	-24931.1	-38777.2	157015
9.73	81996.1	103138	28207.1	71701.6	16380.9	96128.4	21746.8	54650.6	51337.5	122882	69861.1	55953.2	57025.4	111034	95841.8		1.11072e+06	1.62771e+06	14524.5	45609.7	-44507.9	-10246.6	117491	-91779.5	156449	62068.6	165729	-2623.7	-41433.6	-70112	132470
9.71	98500.9	103377	43153.5	55695.6	35774	88757.4	56252.5	47484.7	83666.7	70985.8	12993.4	70622.9	68712.8	85815	66979.8		1.12036e+06	1.6682e+06	4930.96	102038	-53826.3	16094.6	103478	-46543	107305	34482.4	190393	-811.75	-21371.3	-74591.1	159248
9.69	61831.9	113241	101152	50980.5	77395.9	115963	2326.99	4848.01	82687	137094	103738	23982.7	77687.8	95451.1	61750.8		1.14737e+06	1.68851e+06	47015.1	71190.8	-54295.3	29153.2	145436	-62215.1	57344.6	19803.2	169754	-18877.2	-26967.7	-25071	136407
9.67	88811.9	100177	73418.9	76696.9	40969.2	112065	59761.8	66627.8	44762.4	108981	53628.2	40859.1	52414.1	81050.9	96722.2		1.09221e+06	1.70708e+06	40984.1	68223.4	-2850.12	48693	131768	-64724.2	111883	30276.4	193542	19266.6	15100.4	-25867.1	124827
9.65	105263	147437	67997.5	42313.2	58272.2	114502	40566.1	49176.2	49276	110137	27537.8	83696.4	72681.2	107509	118769		1.1203e+06	1.6834e+06	36706.8	106471	-82225.5	35354.2	122360	-46511	164180	31632.3	203118	77825.4	-7537.7	-19163.6	115020
9.63	81893.8	106136	94947	107029	55885.7	94595.9	78359	16862.8	108056	103072	114581	34134.5	86981.6	108886	161838		1.18521e+06	1.73713e+06	61270.5	95380.1	-26887.4	51728.8	155214	-64155.4	186504	48104.6	207522	22175.7	-26257	-54423.9	116684
9.61	129659	129638	121055	80727.5	62243.5	89631.4	56734.6	110210	58982.8	130402	91633.9	44509.1	90105.1	90527.2	104298		1.17236e+06	1.74312e+06	31946.5	95358.4	-57137.3	78991.6	154090	-3211.28	175170	113246	238522	28061.4	5098.58	22628.5	112572
9.59	155003	193184	193449	198648	89275.7	192300	76968.3	90815.8	107918	158823	206244	90877.6	163456	110525	208950		1.30134e+06	1.86995e+06	199647	233494	-13249.7	164572	260002	-4376.97	183320	113585	298386	184623	133065	55928.2	235223
9.57	138776	144169	61056.1	81895.3	76798.9	122024	53415.8	33656.6	91888.1	92367.7	98823.3	93069.7	79149.9	49599	134752		1.16089e+06	1.7365e+06	24636.5	135042	43227.9	118212	129640	-4290.14	148982	79620	261799	5796.18	16437.8	52097	150013
9.55	91568.4	153887	30883.4	72614	61375.7	135240	60228.7	77855.5	81749.8	145914	61755.1	34532.5	87081.5	98855.5	63404.4		1.15365e+06	1.72253e+06	59191.6	118584	-31087.4	95480.7	140896	-47792.2	174295	95636.5	237513	30500	-8350.29	-43033.9	140681
9.53	91438.8	114966	144005	74127.8	15938.9	129174	62220.9	93225.4	77510.6	111552	127553	57064.3	56418.5	129596	116516		1.15696e+06	1717041	47088.7	66899.2	-2651	47005.4	130466	-75462.8	184740	94147.2	219965	51307.2	14350.1	-56563	179264
9.51	107284	164372	78876.2	78138.9	86446.5	131760	97436.4	69322.1	108428	97505.8	92605.8	58433.9	88705.9	130269	146771		1.16799e+06	1.77309e+06	90557.8	139500	-49596.9	80415	198771	-29192.5	152572	87140.5	196299	64273.7	30338.1	-74329.1	168120
9.49	108624	131261	102967	122680	36795.4	119342	63338.8	130457	107618	181303	87899.4	123496	86367.4	129969	130629		1.1886e+06	1.74252e+06	71524.2	109027	-5289.93	143126	173525	-42392.2	192048	79901.7	238734	70500.4	8981.06	15617.8	203294
9.47	148544	120132	145775	70413.8	110505	139110	73272.4	23307.9	120189	128621	110025	37696.4	121734	151506	111092		1.24268e+06	1752002	77732.3	140304	29153.8	76140.2	127142	12926	228130	79368.1	269210	29832.6	34529.5	1321.11	153023
9.45	128776	135713	111451	72068	68010.2	149597	64382	48574.3	120484	120908	122456	41430.5	102282	92894.6	156751		1.17981e+06	1.78417e+06	119649	73467.6	-8556.84	136260	173587	-3894.63	144386	88408.7	296885	112054	39099	9190.8	167359
9.43	205561	146879	71214.7	118136	48505.1	127965	66165.1	155077	72716.8	178038	107839	106653	138121	141387	132807		1.25661e+06	1.83805e+06	108631	155796	-18171.3	86350.2	182485	-30153.8	170685	87398.7	292374	82754.4	23119.7	-30683.7	203922
9.41	113996	105098	168074	121101	53812.2	179593	137860	132897	108312	113354	138360	113423	104368	93974.9	147249		1.21062e+06	1.83094e+06	113683	120907	50691.2	170174	151565	12882.5	150179	111319	261729	104546	69266.6	30385.2	162575
9.39	162342	161132	191244	183416	73650.4	207326	121645	85090.9	116768	153020	140742	152246	131708	149774	249399		1.31027e+06	1.89816e+06	265021	185198	-31412.9	243256	200330	22026.2	191328	99436.3	381681	150352	42400.8	101609	332839
9.37	175796	182402	114994	136340	109454	166996	89939.3	129601	93454.9	154380	127411	99985.9	123918	133554	125104		1.25882e+06	1.84551e+06	179715	189639	-12863.8	113670	151461	104597	248022	130404	323393	112021	85019.5	49396.3	238601
9.35	152935	183512	160010	183767	144215	154395	121011	90569	170950	204994	195637	109870	186219	125476	201782		1.30621e+06	1.86494e+06	210285	236220	17692.8	166412	251040	20984.8	187245	118053	326041	150401	103807	71858.2	284698
9.33	173498	189859	234569	198523	108823	161348	146602	159719	166054	192746	213789	174596	139120	190444	201050		1.30294e+06	1.81289e+06	274860	227224	26743.7	207513	272125	17087.9	242566	157734	399411	161658	176619	71698.9	369110
9.31	143264	206863	148169	157751	110505	133749	115911	99852	115440	164602	116186	35207.8	93568.6	138001	182449		1.31206e+06	1.84869e+06	145834	157119	44528	183496	232312	35701.3	188531	126970	313739	99044.7	111337	46424.3	195025
9.29	199677	125311	152503	190874	96180.5	181470	147621	118652	139358	151982	202030	108350	126144	180917	183202		1.29858e+06	1.83246e+06	145109	156781	51282	115653	256898	17741.8	224583	123891	340483	109603	85623.4	90193.3	225261
9.27	171408	149407	122509	123895	80882.9	119396	135730	106350	112809	158364	148634	145997	136594	125207	132949		1.27944e+06	1.8376e+06	152282	153979	46865.4	149959	196825	36955.1	184443	112326	298451	76674.1	104758	47286.3	235074
9.25	165618	198942	187130	194468	140330	129826	100040	56416.7	186039	175405	170972	78049.6	148201	118265	174335		1.31895e+06	1.93706e+06	215758	218194	104132	211578	197753	20580.3	200537	158226	356503	99937.7	142387	98525.3	293792
9.23	137501	139885	217405	178283	66153.7	201717	97741.8	120750	161541	218240	186256	118066	167107	177566	215901		1.32506e+06	1.86857e+06	208031	227744	47008.9	193979	260449	44821.2	247520	156816	356632	105586	117973	27412	301699
9.21	163429	224941	132595	109688	116108	151033	75849.1	101098	117146	169561	179524	91158.4	105755	150864	197019		1.29383e+06	1.84232e+06	197763	215184	32009.1	205267	250010	38735.2	244593	159833	326109	168994	100381	46046.3	263346
9.19	138923	205454	167373	171754	117994	128820	137105	162797	135009	162081	143288	98985.2	168186	210900	222501		1.32509e+06	1.84921e+06	150422	204649	70879.6	220267	212270	88630.1	237721	144250	327459	111059	134407	61314	248259
9.17	141649	222508	140620	182792	72765.3	169977	159963	58374.3	113281	191921	178895	141333	142643	133333	174226		1.31547e+06	1.87811e+06	199878	211400	93605.8	175038	261164	85128.2	264028	176825	364678	159593	95375.1	65745.1	272992
9.15	129718	213239	146494	142343	97344.4	190941	141455	90279.4	129860	181416	158382	83758.6	146188	170482	213320		1.29312e+06	1.89103e+06	194137	226239	85231.7	184709	285784	93343.3	290590	112151	300251	99159.8	151386	65216	287748
9.13	190730	186871	164759	191339	111516	155647	147271	92661.5	158037	212003	141543	139340	144656	158782	205439		1.53265e+06	2.02716e+06	273298	424454	245231	247302	388133	106891	353694	235631	400379	332526	162778	131899	337628
9.11	146639	169978	144622	140667	90582.5	158986	98163.4	96884.1	154680	177457	153074	125970	99184.6	147401	234363		1.35896e+06	1.91325e+06	216248	272000	157144	235367	263751	40954.3	375166	208480	386733	209189	128588	105373	368108
9.09	216774	178267	189079	138811	101171	166821	130046	143982	146197	187951	191318	155920	140884	183450	209601		1.33633e+06	1.87328e+06	201937	216265	58882.8	220290	184017	68656.6	226956	180244	394238	177813	125298	88905.9	271003
9.07	186739	250055	188913	194696	124264	176852	64555.2	113376	141477	201811	199401	121238	176748	188235	253574		1.32031e+06	1.91763e+06	243181	181126	78261.3	225486	244781	96471.9	271779	160189	410099	122435	120835	97270.3	267551
9.05	182902	169371	135616	136380	103736	182154	153823	131701	136120	154590	143753	100303	126900	140156	164741		1.32048e+06	1.92343e+06	180866	204164	54461.8	201615	229551	91318.7	259480	151149	360939	139631	126711	128786	298320
9.03	208185	160918	199857	110663	126853	174292	150635	129188	166660	201149	200686	100318	206182	150585	208899		1.45283e+06	1.98159e+06	251130	206358	34423.6	262875	300990	35836.7	291466	209648	416078	210371	135060	51836	413284
9.01	164860	212634	186140	155447	110923	168946	127007	83330.9	150950	193804	148307	118851	159476	130205	208013		1.41295e+06	1.95919e+06	223928	249759	119003	188541	231377	106969	348092	192016	352411	121812	134297	36861	328884
8.99	221648	222157	242728	237968	119709	211385	192692	143842	214262	221897	203893	202061	211202	203144	259472		1.47135e+06	2.08876e+06	324587	282760	128380	256409	341784	95580.1	324311	232647	515323	239968	192288	124851	399877
8.97	223533	247055	158643	210351	98442.5	183875	117233	138518	175966	179618	194384	122887	224665	192286	254475		1.39578e+06	1.93793e+06	242023	220921	84313.7	210400	306121	126951	300508	188250	436188	195468	191047	117358	357000
8.95	180939	234829	176365	196872	89391.8	179560	141009	77798.1	193272	190579	158266	111316	128547	201076	211617		1.39266e+06	1.96715e+06	193991	228960	157252	199908	306232	78545.6	286076	157237	434488	200212	166567	131795	309437
8.93	283965	334755	192810	257384	237737	335222	259814	241005	242286	292237	214841	190536	234602	301324	266639		1.59798e+06	2.15749e+06	383068	489260	478150	349654	584641	377892	645345	339461	620448	413153	396265	398132	497944
8.91	205992	221544	185481	229742	115369	232732	146129	196593	201870	216390	180140	143466	157843	186604	244981		1.38301e+06	1.98903e+06	250166	291000	109289	224604	328332	91667.9	318516	241195	426678	180684	187451	177937	310339
8.89	206516	234992	196540	176456	114714	221518	164086	146249	170478	201321	177751	182144	182625	219177	244689		1.44722e+06	1.98109e+06	312393	276485	102397	290688	298543	112404	322748	149145	468244	171581	208528	79075.2	337226
8.87	214790	214182	173972	136629	112567	174925	100510	152530	162095	193881	162768	132826	165297	180507	250822		1.39834e+06	1.97722e+06	218350	273865	88986	182568	260610	48299.5	288840	185483	404545	140916	197119	141246	324875
8.85	209926	251324	211909	116248	144852	193882	177202	143154	136117	246247	168028	121205	214396	208759	233830		1.49196e+06	2.06736e+06	281971	302857	161436	226751	329819	96296.3	329851	299664	451906	238605	167041	160866	344952
8.83	227942	245190	210077	225851	98512.8	219562	190538	145052	166410	212822	258289	170523	166065	211146	249217		1.74212e+06	2.38564e+06	383376	714623	447137	419122	687796	198399	702239	445615	498883	520465	389701	205918	727726
8.81	199723	259728	222950	235233	167379	180153	154915	133115	166820	253940	135614	138261	208559	191024	214965		1.44316e+06	2.00254e+06	253932	323766	137512	258064	339345	132683	379628	218524	412432	250801	214565	127538	368350
8.79	197934	197497	186726	246488	119941	214140	151344	131686	214781	254085	156487	135229	199309	202023	281716		1.41144e+06	1.98023e+06	225484	305232	115346	272746	316448	105940	315976	193809	424127	199116	186502	96049.8	284780
8.77	203151	234619	220677	215354	97122.8	208397	140064	102289	229854	231188	206235	155641	164224	203075	216821		1464651	2.02697e+06	250302	335404	100525	255662	339673	133933	341047	210863	425380	234740	192670	129317	315269
8.75	189825	244262	179109	177770	108816	217166	178920	171667	181961	266513	189841	165944	196817	160474	215499		1.47313e+06	1.99608e+06	267020	200222	122579	242040	302836	98638.6	354455	210265	464963	214602	204824	127193	348148
8.73	223082	295691	136994	138900	136891	200745	144252	211149	226306	260220	180867	107968	177855	147567	222579		1.40925e+06	2.06077e+06	261907	214782	128113	235486	362296	81231.1	284458	261586	414027	222944	169457	135023	350334
8.71	179442	251079	196371	210814	135653	192577	182797	181219	184492	260436	233259	105487	195696	159303	231906		1.45975e+06	2.09727e+06	329852	277297	119680	256465	330167	54658.2	325853	181686	419498	240584	165452	151703	317234
8.69	233379	243072	169205	161768	196714	255233	131754	186326	178573	252092	265832	123249	152639	247045	253325		1.46985e+06	2.14346e+06	255372	285232	145604	273440	350751	83827.2	327124	235544	458031	164740	206606	88179.1	275963
8.67	181687	201453	165051	171783	156773	218164	164654	204159	179434	204757	205767	134463	193302	191593	269043		1.47431e+06	2.0938e+06	236101	245400	127612	260494	349501	96270.4	349047	190824	459858	196619	246389	100533	302230
8.65	256495	219114	217896	166360	186307	219328	201690	147480	220941	210228	258439	177143	175078	169508	215683		1.49768e+06	2.12373e+06	292381	314825	116028	224143	336664	89508.8	352276	250867	509235	253626	228382	213562	387396
8.63	247997	241570	273137	184180	154532	257221	188610	182226	193905	227313	258587	125593	188491	208129	294182		1.57006e+06	2.15359e+06	354166	302335	208561	336469	408207	109850	361613	195601	504244	306962	281139	183762	404920
8.61	320065	318217	270835	289770	194894	310864	270095	263272	265134	342245	307655	175085	236287	261220	339530		1.87512e+06	2.48351e+06	493203	542336	405124	478458	570823	349369	585559	447492	709358	480039	311737	343212	655350
8.59	379750	392054	609686	814902	263035	391120	288164	315737	498400	345607	455962	326121	369364	357355	653227		2.24709e+06	2.6692e+06	1.62891e+06	869165	476342	2.20463e+06	741912	577785	670202	998716	1.66379e+06	929178	491192	569028	1.22511e+06
8.57	320154	308158	287683	289458	210221	314876	222561	285208	333940	315842	285056	243185	246778	282623	415616		1.62017e+06	2.18093e+06	538957	457376	328136	567557	477544	341545	425518	336659	770641	355059	308953	328201	522976
8.55	299289	312940	265147	214170	148118	291818	238186	213727	260411	306150	270668	224087	223746	216900	359709		1.53386e+06	2.12306e+06	357444	359840	260641	358834	363834	136630	382914	299286	591183	260492	292317	201054	483659
8.53	252839	278321	322761	288792	154283	283490	252203	233384	267025	351173	285304	185035	226175	228306	337485		1.6163e+06	2.17221e+06	486301	458346	210315	429726	399002	239539	416300	277936	628529	329281	280664	259470	498654
8.51	266995	288451	250504	249619	197858	314130	213393	171745	300235	269792	300031	190007	244118	279096	319515		1.61531e+06	2.26568e+06	391026	384592	212040	360981	398646	220367	386766	290310	569137	316452	266094	215706	455066
8.49	309268	288937	225871	227979	205283	266456	211530	268164	327378	312726	362481	235936	257929	190494	427472		1.60493e+06	2.215e+06	417809	420400	276867	353364	456093	342532	425558	321740	619940	269989	285606	273528	502760
8.47	296522	340821	288725	354187	235492	341093	245050	229774	383390	338632	382574	218801	263237	271137	434223		1.65568e+06	2.33279e+06	528901	455214	243414	465876	473040	240191	438160	360234	739680	366104	291560	373780	494859
8.45	338122	456459	457831	424042	258352	454372	413367	325952	553083	432312	573871	342515	452882	610090	556848		1.91986e+06	2.79391e+06	749962	736587	609308	749671	844110	430117	851363	629986	1.03537e+06	646605	548774	621725	803888
8.43	324485	336243	328017	269879	192424	259419	280246	240865	389727	310851	388528	211257	301862	305798	452322		1.65807e+06	2.25921e+06	393621	453743	275041	449433	475875	241665	470819	321900	647965	383697	380606	286534	528743
8.41	314032	321868	338289	311580	233163	312732	254307	259415	328160	323189	398557	259296	329865	261621	398464		1.6868e+06	2.30767e+06	452207	514911	257918	455388	516308	242844	465919	347893	718641	383307	403151	286322	587286
8.39	369521	371288	354717	363567	252366	361648	224837	266795	405153	380430	411227	288724	317743	294529	478753		1.8338e+06	2.43831e+06	530466	534133	342835	484436	484676	276665	532075	394148	768279	429737	394884	362456	601402
8.37	473044	475123	556204	474703	349663	582266	362003	423874	469757	494842	537796	368512	456299	469783	601696		1851743	2.50909e+06	593794	552558	631268	479422	641576	554120	704717	429796	905792	466447	505819	570778	679604
8.35	407062	478884	422450	423858	321657	448510	383880	414557	455864	487323	471100	348090	373623	437111	536558		2.10006e+06	2.65992e+06	873339	777636	501365	714926	780691	639020	691549	565356	1.01014e+06	696571	537539	642601	1.03726e+06
8.33	432027	419849	528385	550108	262029	444166	370192	444744	515016	438807	471715	384552	364182	394085	604771		1.96487e+06	2.57047e+06	1.03636e+06	790791	550553	750185	805544	930249	770312	546867	1.38879e+06	735444	525588	766666	942664
8.31	354961	422044	410475	393776	285819	364481	370453	311479	479595	394509	490224	345080	397803	379924	602247		1.85972e+06	2.54204e+06	593277	612733	385178	572505	616117	483941	620260	450520	879747	552127	486430	468739	715385
8.29	375899	416058	446398	426275	254117	422260	300690	342473	454931	385542	573668	374123	408463	369912	598344		1.95276e+06	2.62348e+06	635038	649464	501190	576927	653212	454911	676417	446587	887496	541332	495138	468602	722441
8.27	394869	509012	494539	431915	380449	449511	449341	313943	508641	435384	547081	439270	427015	389487	652149		2.22718e+06	2.79529e+06	713693	810779	536046	674413	788713	524904	794654	596444	1.0034e+06	623376	793615	689642	925394
8.25	622954	547858	743272	983045	490422	620068	521230	543221	659230	516952	669466	513121	541307	562166	833210		2.98618e+06	3.41172e+06	1.92743e+06	1.41056e+06	1.10285e+06	2.23057e+06	1.15298e+06	945975	1.04407e+06	1.25541e+06	2.05642e+06	1.41145e+06	747873	841817	1.78355e+06
8.23	580644	609611	739657	761454	474045	621347	540865	661331	695568	705845	803763	586965	612048	646495	965535		2.62966e+06	3.19985e+06	1.61114e+06	1.40021e+06	1.33624e+06	1.30127e+06	1.3136e+06	1.40634e+06	1.25408e+06	995914	1.88267e+06	1.29224e+06	833788	1.33457e+06	1.67739e+06
8.21	1.03487e+06	1.1642e+06	1.25818e+06	1.23064e+06	880697	1.03638e+06	980580	1.78172e+06	1.13795e+06	1.38812e+06	1.53152e+06	1.04774e+06	1.19216e+06	1.09401e+06	1.83498e+06		3.35489e+06	4.03952e+06	1.77649e+06	1.96132e+06	2.34813e+06	1.62192e+06	2.15161e+06	2.77797e+06	2.11212e+06	1.54604e+06	2.3835e+06	1.88862e+06	1.6753e+06	2.25461e+06	2.13961e+06
8.19	1.19524e+06	1.3157e+06	1.61413e+06	1.53263e+06	982200	1.17919e+06	1.05299e+06	2.26323e+06	1.47456e+06	1.59712e+06	1.86232e+06	1.17589e+06	1.37662e+06	1.30365e+06	2.35795e+06		3.37621e+06	3.89817e+06	2.03137e+06	2.15134e+06	2.75639e+06	1.94874e+06	2.4595e+06	3.94615e+06	2.55676e+06	1.88978e+06	2.92642e+06	2.21662e+06	2.1464e+06	2.96911e+06	2.29256e+06
8.17	847475	761434	1.10504e+06	955411	592544	771887	792046	1.5361e+06	1.00396e+06	1.00552e+06	1.21716e+06	837364	851551	961708	1.56117e+06		2.58318e+06	3.02677e+06	1.54453e+06	1.50874e+06	1.9474e+06	1.42811e+06	1.75495e+06	3.21978e+06	1.94018e+06	1.23207e+06	2.56781e+06	1.48862e+06	1.64171e+06	2.23454e+06	1.62179e+06
8.15	544445	477912	545391	536494	357085	519944	419430	516591	610222	493337	672335	454455	496784	490889	746161		1.98258e+06	2.6586e+06	773039	934458	951468	728895	887703	1.05178e+06	865258	581350	1.25047e+06	718657	673722	910687	984693
8.13	593402	589138	642077	716160	412615	648598	529164	567314	910361	577481	904437	574320	608715	582481	1.0006e+06		2.13104e+06	2.8699e+06	850448	1.0192e+06	937643	751408	964788	892090	925977	636937	1.36146e+06	775998	751858	968842	1.05591e+06
8.11	702288	737840	948687	1.12461e+06	557371	742665	675224	758532	1.02768e+06	722513	1.19261e+06	883360	751010	634502	1.22132e+06		2.43352e+06	3.09514e+06	1.59107e+06	1.15129e+06	977611	1.49313e+06	1.11209e+06	954858	1.13547e+06	933608	2.27823e+06	1.14183e+06	1.01992e+06	1.25729e+06	1.35299e+06
8.09	600797	670571	775001	1.03245e+06	460766	657324	535808	502978	780030	649397	905279	620896	655315	574595	1.00984e+06		2.25983e+06	2.93421e+06	1.31762e+06	1.05571e+06	887272	1.25365e+06	1.02714e+06	853718	1.07718e+06	891972	1.85612e+06	974458	909009	955624	1.18673e+06
8.07	607962	676429	657019	624337	490472	708222	547993	552253	738439	593620	811002	584897	600766	581659	856516		2.28283e+06	2.90495e+06	922222	1.11015e+06	983877	872952	1.08289e+06	960583	1.09832e+06	708758	1.26718e+06	929039	777625	805228	1.11766e+06
8.05	604286	638229	682723	688507	419073	681020	553572	605903	812099	629002	867958	584985	586051	556514	950336		2.29372e+06	3.03579e+06	891467	1.10634e+06	1.03761e+06	775011	1.08109e+06	878837	1.10974e+06	678176	1.30706e+06	895050	682621	903044	1.14505e+06
8.03	674901	777643	781665	759476	533347	782662	610321	707432	981566	678037	980526	652530	728216	659524	1.14418e+06		2.47299e+06	3.11144e+06	996686	1.14307e+06	1.37047e+06	900737	1.17312e+06	1.10066e+06	1.17351e+06	734917	1.52095e+06	883747	810721	1.14669e+06	1.16033e+06
8.01	593298	644719	689891	674244	410188	671475	492197	607485	856327	632108	867092	564096	645878	622723	954396		2.59838e+06	3.23082e+06	1.04676e+06	1.19265e+06	1.22011e+06	911212	1.19061e+06	1.07663e+06	1.26964e+06	736756	1.44978e+06	943084	786691	1.09282e+06	1.23415e+06
7.99	633718	632880	685637	743917	459667	712789	482350	581790	862182	666215	938272	560816	552139	567452	933623		3.01824e+06	3.72862e+06	1.27903e+06	1.42465e+06	1.39106e+06	1.04198e+06	1324515	1.29676e+06	1.58249e+06	971322	1.73277e+06	1.16184e+06	970309	1.23673e+06	1.73462e+06
7.97	739707	1.83898e+06	3.14491e+06	864084	743209	805358	1.46477e+06	686362	1.05802e+06	1443019	5.68012e+06	1.34044e+06	779551	5.58732e+06	5.61313e+06		6.96008e+06	8.45783e+06	5.53056e+06	5.36482e+06	4.23218e+06	6.36914e+06	5.53473e+06	1.46935e+06	7.01864e+06	4.89164e+06	4.35587e+06	5.39505e+06	1.5323e+07	6.34173e+06	8.80037e+06
7.95	8.42478e+06	7.21464e+06	9.73094e+06	1.16901e+07	1.05005e+07	7.7227e+06	7.03052e+06	9.91574e+06	8.17896e+06	7.28968e+06	3.77136e+06	8.64383e+06	6.57574e+06	2.89722e+06	8.55206e+06		9.89089e+06	5.41386e+06	1.32259e+07	7.68289e+06	1.0687e+07	1.13125e+07	8.97006e+06	1.87281e+07	1.06645e+07	9.65547e+06	1.73593e+07	8.19641e+06	2.09141e+06	1.42481e+07	4.87057e+06
7.93	3.43837e+06	3.06783e+06	1.99615e+06	2.15259e+06	2.6536e+06	3.86383e+06	2.71884e+06	4.1765e+06	2.27018e+06	3.21984e+06	2.46317e+06	2.43366e+06	2.68681e+06	3.98669e+06	2.86661e+06		2.65451e+06	3.07752e+06	1.83625e+06	1.98163e+06	3.67891e+06	1.83406e+06	2.31234e+06	7.03178e+06	3.10973e+06	1.60421e+06	2.86998e+06	1.86271e+06	3.07861e+06	3.76538e+06	1.7098e+06
7.91	1.12428e+06	952374	966071	967460	837408	1.23341e+06	941647	1.22057e+06	1.27807e+06	923965	1.2072e+06	949374	1.12938e+06	923027	1.39213e+06		2.03652e+06	2.65739e+06	1.14415e+06	1.32336e+06	2.32317e+06	1.10662e+06	1.37679e+06	3.70421e+06	1.58986e+06	841916	1.88382e+06	1.17091e+06	1.15367e+06	1.86942e+06	1.19585e+06
7.89	938523	864533	840394	882749	831321	1.1674e+06	847652	1.08732e+06	1.05212e+06	1.02469e+06	1.11324e+06	898987	923167	916279	1.20707e+06		2.04966e+06	2.63889e+06	1.07894e+06	1.1161e+06	1.64364e+06	985878	1.13673e+06	2.34966e+06	1.18812e+06	712386	1.54848e+06	979052	1.19644e+06	1.76424e+06	1.1595e+06
7.87	1.24794e+06	1.07058e+06	967132	1.02146e+06	1.1312e+06	1.52834e+06	1.03876e+06	1.59565e+06	1.21503e+06	1.24755e+06	1.18073e+06	1.14515e+06	973644	1.06588e+06	1.22067e+06		2.08621e+06	2.80593e+06	1.33703e+06	1.17232e+06	1.89342e+06	1.19449e+06	1.22124e+06	4.83114e+06	1.39854e+06	841858	1.78357e+06	1.09108e+06	1.90995e+06	3.06433e+06	1.27648e+06
7.85	791901	865416	927286	907018	703155	957453	798313	786796	1.05832e+06	848145	1.06607e+06	823915	887807	788528	1.08702e+06		2.06143e+06	2.68417e+06	1.14729e+06	1.05421e+06	1.16042e+06	1.02956e+06	1.05302e+06	1.47229e+06	1.07384e+06	728679	1.54391e+06	957913	953034	1.22262e+06	1.12103e+06
7.83	735811	768219	825607	843048	560443	865588	719000	699396	1.00126e+06	706967	1.06e+06	743057	868383	683393	1.00792e+06		2.03371e+06	2.65218e+06	1.01046e+06	974628	925242	949730	970789	1.03052e+06	922417	661584	1.39013e+06	868990	840478	992494	1.08306e+06
7.81	652807	737277	780571	765317	627501	753412	653164	631453	911827	668387	928100	696476	784520	592203	965260		1.98893e+06	2.62613e+06	1.01211e+06	956391	797026	880282	867678	724152	860133	681815	1.29351e+06	826247	777516	903721	1.05182e+06
7.79	619088	698347	693767	749066	530391	629088	636838	583119	801876	655302	833256	643928	701770	570889	831811		2.02793e+06	2.69007e+06	910581	983852	779138	873987	912057	827565	844282	654947	1.23464e+06	789982	668713	776450	1.00196e+06
7.77	607210	711568	726283	749404	537725	664347	633381	575085	897263	652803	828946	639197	699246	567083	868647		2.14088e+06	2.83693e+06	975262	1.10061e+06	831031	924327	955859	806287	931531	737954	1.23274e+06	956995	755334	772537	1.20103e+06
7.75	736851	864979	1.64969e+06	1.38319e+06	717325	754036	704641	655118	1.63196e+06	760634	1.17198e+06	865932	955058	704205	1.48362e+06		2.20458e+06	2.87487e+06	1.37219e+06	1.22517e+06	892698	1.19347e+06	1.03041e+06	802547	982640	857949	1.47246e+06	1.12169e+06	863828	937826	1.36186e+06
7.73	1.13195e+06	933261	1.00799e+06	1.10527e+06	1.02259e+06	1.23666e+06	1.25585e+06	1.38307e+06	979610	1.21748e+06	1.04432e+06	1.385e+06	1.07979e+06	1.29861e+06	1.11589e+06		2.29889e+06	3.22914e+06	1.74429e+06	1.30927e+06	1.40698e+06	1.67611e+06	1.44875e+06	2.03723e+06	2.10476e+06	1.18941e+06	1.85418e+06	1.19513e+06	1.36887e+06	1.6651e+06	1.35303e+06
7.71	1.23538e+06	1.04195e+06	1.34828e+06	1.26864e+06	1.06596e+06	1.41646e+06	1.37289e+06	1.50504e+06	1.35594e+06	1.38769e+06	1.22322e+06	1.47024e+06	1.28131e+06	1.46714e+06	1.3986e+06		2.35357e+06	3.1102e+06	2.00381e+06	1.46014e+06	1.90892e+06	1.91388e+06	1.63086e+06	2.84628e+06	2.29421e+06	1.29426e+06	2.37762e+06	1.35737e+06	1.60568e+06	2.16521e+06	1.5327e+06
7.69	692841	693471	886728	805927	575152	748370	722212	751791	778864	756881	852925	664509	706566	649096	878157		2.07366e+06	2.77873e+06	1.15188e+06	1.04507e+06	1.09633e+06	1.06051e+06	1.01394e+06	1.14067e+06	1.16517e+06	792367	1.3752e+06	867624	922770	966440	1.10465e+06
7.67	872196	830923	656407	630799	642021	872825	626076	889057	667178	873516	676194	654353	677634	751942	765174		2.11885e+06	2.72393e+06	966895	1.02413e+06	1.25329e+06	908812	1.00101e+06	1.35387e+06	1.19789e+06	843573	1.28318e+06	803781	921942	989379	973660
7.65	582988	527221	601573	550945	491417	622249	545137	509311	580095	609047	632131	540208	576714	504136	677667		2.02051e+06	2.75855e+06	920089	907742	807622	831853	869404	690772	943001	684754	1121433	703625	695039	656817	951545
7.63	500154	527551	564625	591322	480889	536398	504957	434896	535350	515684	625428	480605	605181	476305	645998		2.01249e+06	2.73909e+06	890199	888469	684210	769508	813271	518145	830529	712564	1.10329e+06	736859	612821	598841	940911
7.61	544470	596009	585884	586645	465871	548677	453546	445340	538050	599136	574031	493628	484958	441059	589692		2.04889e+06	2.83588e+06	891097	843910	647421	830217	833836	509503	904021	703758	1.08646e+06	769893	689611	594624	927583
7.59	563424	586230	573864	555916	428152	527638	484084	448908	522858	568411	581220	447689	500302	425970	571636		2.1423e+06	2.89338e+06	899786	903384	701866	808311	801270	578603	918812	659328	1.0872e+06	785189	701460	579848	960680
7.57	611788	611552	592850	547029	488697	597175	557080	494463	572719	557084	577816	552950	530352	510290	638502		2.17106e+06	2.9397e+06	964505	905500	767130	856267	914541	627654	918531	749630	1.18763e+06	720727	746466	681757	935517
7.55	670833	718756	648537	635421	509316	646181	644520	541577	615363	670621	658581	602973	563330	610343	700844		2429955	3.27653e+06	1.07325e+06	1.12608e+06	1.21393e+06	973100	1.08053e+06	869844	1.20638e+06	886615	1.2535e+06	939704	851108	857607	1.12535e+06
7.53	2.60217e+06	2.41614e+06	1.67059e+06	1.7919e+06	2.36616e+06	2.99112e+06	2.71145e+06	3.52906e+06	1.73442e+06	2.86913e+06	1.8191e+06	2.63121e+06	2.23082e+06	3.47101e+06	2.13939e+06		3.5836e+06	4.76841e+06	2.94025e+06	2.37681e+06	4.60092e+06	2.86838e+06	3.20201e+06	5.76627e+06	4.35314e+06	2.35837e+06	3.05475e+06	2.42831e+06	3.07363e+06	3.81179e+06	2.4896e+06
7.51	1.54612e+06	1.29006e+06	1.31975e+06	1.30493e+06	1.20707e+06	1.69124e+06	1.61765e+06	1.85824e+06	1.44881e+06	1.59249e+06	1.21924e+06	1.60744e+06	1.29353e+06	1.93988e+06	1.44412e+06		2.87192e+06	3.70262e+06	2.31907e+06	1.87827e+06	2.88706e+06	2.30003e+06	2.16983e+06	3.99146e+06	3.17665e+06	1.68239e+06	2.84631e+06	1.72222e+06	2.21027e+06	2.80062e+06	1.91065e+06
7.49	794574	737227	714817	674286	653359	760429	681355	640482	719303	725528	726707	659324	670298	627763	768840		2.53965e+06	3.30871e+06	1.19955e+06	1.18538e+06	1.08076e+06	1.13271e+06	1.14012e+06	1.00628e+06	1.29548e+06	971144	1.4787e+06	1.01734e+06	1.07598e+06	1.00212e+06	1.27153e+06
7.47	811674	819580	822506	737215	690373	790785	786079	659197	744210	810597	829167	673277	757919	684708	907016		2.77621e+06	3.63248e+06	1.42236e+06	1.2121e+06	1.06415e+06	1.23213e+06	1.24095e+06	1.02597e+06	1.35497e+06	1.00259e+06	1.49324e+06	1.08185e+06	1.15319e+06	1.03797e+06	1.29753e+06
7.45	832611	883818	781541	768638	674064	875693	793658	686563	701674	884211	842533	779710	782762	809119	946404		2.96624e+06	4.11208e+06	1.41613e+06	1.40178e+06	1.04306e+06	1.30333e+06	1.34445e+06	960954	1.44824e+06	1.17921e+06	1.55108e+06	1.22729e+06	1.39914e+06	1.04473e+06	1.4378e+06
7.43	2.59815e+06	1.98687e+06	2.22325e+06	2.29642e+06	2.14172e+06	2.9745e+06	2.91592e+06	3.35418e+06	2.24752e+06	2.53903e+06	2.16529e+06	2.8302e+06	2.35208e+06	3.5488e+06	2.65844e+06		5.14379e+06	6.83968e+06	4.04541e+06	3.60765e+06	5.16453e+06	3.85396e+06	4.19229e+06	6.65525e+06	5.60559e+06	3.59029e+06	4.34891e+06	3.26604e+06	4.28284e+06	4.94887e+06	3.87199e+06
7.41	7.5851e+06	4.89492e+06	5.45638e+06	6.46825e+06	6.04896e+06	8.68668e+06	8.08797e+06	1.07211e+07	6.95802e+06	6.71955e+06	5.35563e+06	8.72004e+06	6.71694e+06	1.05342e+07	7.13037e+06		8.94448e+06	1.06688e+07	1.06232e+07	9.10746e+06	1.60818e+07	1.01432e+07	1.1049e+07	2.33113e+07	1.68142e+07	9.61306e+06	1.19702e+07	8.34834e+06	11389691	1.54706e+07	9.53494e+06
7.39	1.52796e+06	1.21175e+06	1.28818e+06	1.22112e+06	1.03845e+06	1.46402e+06	1.32915e+06	1.40118e+06	1.55263e+06	1.23663e+06	1.17914e+06	1.31681e+06	1.15275e+06	1.51138e+06	1.5217e+06		3280730	3.77822e+06	2.20563e+06	2.25494e+06	2.87098e+06	2.13522e+06	2.1892e+06	3.43035e+06	3.03547e+06	1.90193e+06	3.02178e+06	1.89431e+06	2.30693e+06	2.47302e+06	2.17385e+06
7.37	4.48892e+06	3.1622e+06	3.26349e+06	3.7934e+06	3.64493e+06	5.02525e+06	4.72406e+06	5.93981e+06	4.01513e+06	4.02095e+06	3.33945e+06	4.99116e+06	3.95101e+06	5.67396e+06	4.19291e+06		6.47005e+06	7.83904e+06	6.50513e+06	5.72438e+06	8.87752e+06	6.22692e+06	6.71454e+06	1.23638e+07	9.61972e+06	5.85197e+06	7.19465e+06	5.23754e+06	6.71919e+06	8.62166e+06	5.97011e+06
7.35	2.59473e+06	1.89512e+06	2.29717e+06	2.20444e+06	1.94385e+06	2.67174e+06	2.4552e+06	2.81838e+06	2.68742e+06	2.19048e+06	2.14441e+06	2.49772e+06	2.09955e+06	2.88603e+06	2.58749e+06		4.8119e+06	5.44326e+06	4.13288e+06	3.86621e+06	5.07189e+06	3.83915e+06	4.03175e+06	6.465e+06	5.32893e+06	3.47123e+06	4.95458e+06	3.363e+06	4.04505e+06	4.67276e+06	3.76698e+06
7.33	5.09214e+06	3.75547e+06	3.61498e+06	4.41687e+06	4.39358e+06	5.86969e+06	5.62612e+06	7.01527e+06	4.13249e+06	4.77243e+06	3.83456e+06	5.85317e+06	4.61125e+06	6.23023e+06	4.71396e+06		7.77788e+06	9.65732e+06	7.84942e+06	6.65703e+06	9.70076e+06	7.4723e+06	7.83653e+06	1.36426e+07	1.10291e+07	6.95244e+06	8.13592e+06	6.23803e+06	7.96768e+06	9.77892e+06	7.01163e+06
7.31	8.52259e+06	5.42131e+06	6.86631e+06	7.49426e+06	6.71814e+06	9.44633e+06	9.10602e+06	1.16969e+07	8.69802e+06	7.71399e+06	6.1823e+06	9.85186e+06	7.52328e+06	1.20054e+07	8.08263e+06		9.06747e+06	1.02738e+07	1.23677e+07	1.00731e+07	1.73606e+07	1.20575e+07	1.1957e+07	2.58751e+07	1.88909e+07	1.04319e+07	1.43332e+07	9.47077e+06	1.26084e+07	1.72362e+07	1.0272e+07
7.29	2.02374e+06	1.6128e+06	1.82212e+06	1.75126e+06	1.66422e+06	1.99321e+06	1.99234e+06	1.8412e+06	1.96642e+06	1.7681e+06	1.76954e+06	1.9862e+06	1.66268e+06	1.81597e+06	1.98935e+06		3.95759e+06	4.25586e+06	3.53537e+06	3.17327e+06	3.48532e+06	3.39116e+06	3.18369e+06	4019202	4.00596e+06	2.86101e+06	4.24738e+06	2.94759e+06	3.39153e+06	3.36762e+06	3.12576e+06
7.27	2.4165e+06	2.07854e+06	2.30238e+06	2.29053e+06	2.16843e+06	2.49611e+06	2.77428e+06	2.7325e+06	2.27412e+06	2.48376e+06	2.12419e+06	2.79989e+06	2.22888e+06	2.61775e+06	2.40206e+06		4.40356e+06	5.14147e+06	4.31842e+06	3.45665e+06	3.67082e+06	4.17022e+06	3.77914e+06	4.82183e+06	4.97821e+06	3.31614e+06	4.62481e+06	3.39566e+06	3.91924e+06	4.2554e+06	3.50724e+06
7.25	2.19481e+06	1.94779e+06	2.23573e+06	2.04431e+06	1.87235e+06	2.16203e+06	2.28559e+06	2.17117e+06	2.26683e+06	2.08648e+06	2.07758e+06	2.27714e+06	1.93419e+06	2.02823e+06	2.24585e+06		4.27774e+06	4.81544e+06	4.09338e+06	3.3141e+06	3.3653e+06	3.91526e+06	3.43246e+06	4.27079e+06	4.18316e+06	3.05928e+06	4.68844e+06	3.18846e+06	3.69593e+06	3.94094e+06	3.4129e+06
7.23	1.66391e+06	1.7117e+06	1.7559e+06	1.65001e+06	1.44033e+06	1.6339e+06	1.75113e+06	1.49887e+06	1.72463e+06	1.67966e+06	1.70989e+06	1609069	1.47512e+06	1.36809e+06	1.82078e+06		4.00296e+06	4.55157e+06	3.26994e+06	2.86558e+06	2.43926e+06	3.11887e+06	2.87943e+06	2.51454e+06	3.192e+06	2.63606e+06	3.62355e+06	2.81798e+06	2.87358e+06	2.65998e+06	2.94524e+06
7.21	1.67601e+06	1.6598e+06	1.5806e+06	1.46223e+06	1.48219e+06	1.72552e+06	1.79939e+06	1.64513e+06	1.55683e+06	1.76697e+06	1.55093e+06	1.6517e+06	1.50092e+06	1.49339e+06	1.66894e+06		3.83037e+06	4.63221e+06	3.03504e+06	2.57969e+06	2.47937e+06	2.92948e+06	2.73954e+06	2.83603e+06	3.19427e+06	2.32539e+06	3.48179e+06	2.56674e+06	2.8771e+06	2.66517e+06	2.72835e+06
7.19	5.50533e+06	3.58372e+06	2.82514e+06	3.24243e+06	6.18225e+06	8.89405e+06	9.76579e+06	1.17803e+07	3.34163e+06	9.20494e+06	3.22869e+06	1.04226e+07	6.05869e+06	1.12137e+07	3.92248e+06		5.13232e+06	8.21493e+06	1.17888e+07	3.97053e+06	9.73861e+06	1.45893e+07	8.52105e+06	27240006	1.60465e+07	6.58612e+06	16277971	5.36978e+06	1.05847e+07	1.51481e+07	5.38134e+06
7.17	5.38909e+06	3.27293e+06	2.78881e+06	3.03897e+06	5.64128e+06	8.67755e+06	9.34116e+06	1.1343e+07	3.62496e+06	8.67212e+06	3.18408e+06	1.00505e+07	5.73795e+06	1.12134e+07	4.01677e+06		5.11115e+06	7.06465e+06	1.18098e+07	4.14213e+06	1.03408e+07	1.46206e+07	8.36607e+06	2.96344e+07	1.62557e+07	6.40677e+06	1.8121e+07	5.33926e+06	1.0972e+07	1.56941e+07	5.39078e+06
7.15	1.89438e+06	1.67047e+06	1.7654e+06	1.57174e+06	1.59812e+06	1.71851e+06	1.85704e+06	1.59988e+06	1.79065e+06	1.66869e+06	1.71657e+06	1.79341e+06	1.54278e+06	1.50359e+06	1.90027e+06		4.97277e+06	5.28223e+06	3527446	3.39481e+06	3.57267e+06	3.22496e+06	3.32259e+06	3.54667e+06	4.08491e+06	2.85686e+06	4.57939e+06	3.12909e+06	3.65228e+06	3.23363e+06	3.53784e+06
7.13	1.96968e+06	1.92865e+06	1.89003e+06	1.72412e+06	1.79829e+06	1.9596e+06	1.92703e+06	1.7631e+06	2.00456e+06	1.79849e+06	1.89757e+06	1.88531e+06	1.70739e+06	1.73781e+06	2.28525e+06		9.20639e+06	9.33685e+06	4.82997e+06	6.76386e+06	6.84916e+06	3.84147e+06	5.94216e+06	4.02596e+06	7.88154e+06	4.92067e+06	5.79479e+06	6.23762e+06	6.95936e+06	4.60784e+06	8.20214e+06
7.11	9.72075e+06	9.22227e+06	1.32362e+07	1.24537e+07	1.21747e+07	8.85948e+06	9.2557e+06	1.10741e+07	9.31493e+06	8.79445e+06	9.69348e+06	1.05568e+07	7.88395e+06	8.31566e+06	1.4153e+07		1.5747e+07	1.07719e+07	2.09924e+07	1.40014e+07	1.655e+07	1.93581e+07	1.6163e+07	2.2588e+07	1.88371e+07	1.64645e+07	2.52725e+07	1.4613e+07	1.62251e+07	2.26014e+07	1.31698e+07
7.09	2.03203e+06	1.83508e+06	1.97437e+06	1.90572e+06	1.74092e+06	1.78412e+06	1.84866e+06	1.67287e+06	1.87718e+06	1.70955e+06	1.82952e+06	1.78515e+06	1.70849e+06	1.42611e+06	2.03025e+06		4.20551e+06	4.01788e+06	3.51651e+06	3.61132e+06	3.53811e+06	3.32505e+06	3.22128e+06	3.23183e+06	3.91729e+06	3.03467e+06	4.44241e+06	3.51118e+06	3.2859e+06	3.05956e+06	3.44159e+06
7.07	1.71108e+06	1.69637e+06	1.68272e+06	1.54325e+06	1.51806e+06	1.54704e+06	1.73073e+06	1.55563e+06	1.5962e+06	1.56199e+06	1.60839e+06	1.57253e+06	1.47585e+06	1.35431e+06	1.7577e+06		3.28874e+06	3.59107e+06	2.93424e+06	2.57393e+06	2.36768e+06	2.80323e+06	2.56078e+06	2.50916e+06	2.79607e+06	2.37639e+06	3.41145e+06	2.58339e+06	2.8985e+06	2.62069e+06	2.57518e+06
7.05	1.60712e+06	1.64413e+06	1.55241e+06	1.42494e+06	1.3908e+06	1.49046e+06	1.63178e+06	1.33758e+06	1.46026e+06	1.4645e+06	1.51689e+06	1.47201e+06	1.41897e+06	1.2919e+06	1.71178e+06		3.18025e+06	3.72683e+06	2.6822e+06	2.38488e+06	2.10979e+06	2.54386e+06	2.40328e+06	2.20648e+06	2.4733e+06	2.14053e+06	2.98102e+06	2.38553e+06	2.7442e+06	2.41037e+06	2.445e+06
7.03	1.76302e+06	1.75724e+06	1.91428e+06	1.70826e+06	1.54241e+06	1.89411e+06	2.04132e+06	1.60755e+06	1.55485e+06	1.79858e+06	1.89992e+06	1.71624e+06	1.65443e+06	1.73771e+06	2.02684e+06		3.37706e+06	4.088e+06	3004022	2.51073e+06	2133711	3.01572e+06	2.67265e+06	2.57772e+06	2.71381e+06	2.40122e+06	3.27257e+06	2.56321e+06	3.4683e+06	2.82011e+06	2.57779e+06
7.01	1.50746e+06	1.48058e+06	1.57029e+06	1.34621e+06	1.3109e+06	1.4194e+06	1.58073e+06	1.3214e+06	1.42173e+06	1.46039e+06	1.46029e+06	1.438e+06	1.33684e+06	1.25621e+06	1.57646e+06		3.19664e+06	3.6733e+06	2524053	2.32822e+06	1.96899e+06	2.47594e+06	2.2525e+06	2.15911e+06	2.35742e+06	2.03929e+06	2.77915e+06	2.24405e+06	2.66548e+06	2.29496e+06	2.42931e+06
6.99	1.40928e+06	1.44036e+06	1.3738e+06	1.29589e+06	1.27192e+06	1.37287e+06	1.50534e+06	1.32171e+06	1.3837e+06	1386991	1.39889e+06	1.40641e+06	1.3463e+06	1.21421e+06	1.50877e+06		3.81596e+06	4.20923e+06	2.42508e+06	3.32831e+06	2.6402e+06	2.43327e+06	2.7399e+06	2.06369e+06	2.80818e+06	2.35037e+06	2.55283e+06	2.67403e+06	2.54389e+06	2.18435e+06	2.92863e+06
6.97	1.52614e+06	1.46401e+06	1.47212e+06	1.35421e+06	1.36609e+06	1.43348e+06	1.56368e+06	1.34533e+06	1.41497e+06	1.39625e+06	1.39472e+06	1.40897e+06	1.42648e+06	1.20495e+06	1.61756e+06		3.76496e+06	4.13836e+06	2.44924e+06	3.22435e+06	2.64813e+06	2.46797e+06	2.73297e+06	2.01972e+06	2.81745e+06	2.3523e+06	2.68022e+06	2.74498e+06	2.60111e+06	2.2592e+06	2.83932e+06
6.95	1.45461e+06	1.5045e+06	1.45144e+06	1.31545e+06	1.32275e+06	1.42974e+06	1.54903e+06	1.30533e+06	1.36413e+06	1.40259e+06	1.39521e+06	1.44737e+06	1.38763e+06	1.23537e+06	1.5664e+06		3.41082e+06	3.94967e+06	2.44e+06	2.72851e+06	2.31746e+06	2.41542e+06	2.52362e+06	1.99603e+06	2.65392e+06	2.19102e+06	2.61963e+06	2.47231e+06	2.60883e+06	2.27059e+06	2.53352e+06
6.93	1.49424e+06	1.52077e+06	1.42385e+06	1.41629e+06	1.39087e+06	1.4749e+06	1.60657e+06	1.38267e+06	1.45207e+06	1.49075e+06	1.49556e+06	1.47842e+06	1449378	1.25215e+06	1.5932e+06		3.33999e+06	4.09798e+06	2.71629e+06	2.34168e+06	2.18614e+06	2.65114e+06	2.54144e+06	2.11037e+06	2.71614e+06	2.19256e+06	3.00938e+06	2.35681e+06	2.64683e+06	2.33333e+06	2.51064e+06
6.91	1.60767e+06	1.5129e+06	1.42799e+06	1.41798e+06	1.55323e+06	1.75418e+06	2.05232e+06	1.71802e+06	1.40455e+06	1.90377e+06	1.49644e+06	1.85444e+06	1.52949e+06	1.50973e+06	1.61973e+06		3.46076e+06	4.60662e+06	3.30143e+06	2.51813e+06	2.75683e+06	3.38231e+06	2.96413e+06	2.91924e+06	3.56519e+06	2.54196e+06	3.61705e+06	2.48316e+06	3.03198e+06	2.97662e+06	2.72903e+06
6.89	7.13485e+06	4.21131e+06	2.43346e+06	3.23102e+06	7.98585e+06	1.21243e+07	1.38703e+07	1.60478e+07	3.23795e+06	1.30762e+07	3.4892e+06	1.45755e+07	7.99961e+06	1.48185e+07	4.27758e+06		5.10453e+06	9.45894e+06	1.71975e+07	4.27688e+06	1.38368e+07	2.21973e+07	1.19146e+07	4.04814e+07	2.31308e+07	9.01415e+06	2.34582e+07	6.84238e+06	1.61878e+07	2.23523e+07	6.52772e+06
6.87	2.51997e+06	1.77989e+06	1.80439e+06	1.70532e+06	2.06919e+06	3.18818e+06	3.40751e+06	3.7981e+06	2.26468e+06	3.09029e+06	1889127	3.43447e+06	2.38613e+06	4.64005e+06	2.33243e+06		3.36596e+06	3.93684e+06	5.72183e+06	2.74519e+06	6.01995e+06	6.47578e+06	4.33474e+06	1.46166e+07	7.25466e+06	3.33309e+06	1.0714e+07	3.08457e+06	5.23919e+06	7.65493e+06	3.34419e+06
6.85	2.1855e+06	1.94229e+06	1.64163e+06	1.67076e+06	1.80549e+06	2.46902e+06	3.32638e+06	2.42614e+06	1.70542e+06	2.74746e+06	1.83096e+06	2.76234e+06	2.15651e+06	2.26738e+06	2.0663e+06		3.50711e+06	4.26596e+06	4.68961e+06	2.67709e+06	2.82722e+06	4.90527e+06	3.51312e+06	3.27036e+06	4.13327e+06	2.9514e+06	5.88571e+06	2.79088e+06	3.92702e+06	3.72095e+06	2.88018e+06
6.83	2.07143e+06	1.56802e+06	1.70557e+06	1619388	1.51796e+06	1.79753e+06	1.908e+06	1.83277e+06	1.72591e+06	1.77366e+06	1.71691e+06	1.6766e+06	1.55278e+06	2.09614e+06	1.86378e+06		4.17342e+06	4.94198e+06	3.78462e+06	3.24387e+06	3.99426e+06	3.34454e+06	3.83523e+06	5.07641e+06	4.63485e+06	3.40233e+06	4.09672e+06	3.41937e+06	4.37777e+06	4.26975e+06	3.33853e+06
6.81	1.74616e+06	1.69462e+06	1.76027e+06	1.58379e+06	1.3766e+06	1.63212e+06	1.692e+06	1.50638e+06	1.7121e+06	1.62998e+06	1.70787e+06	1.54286e+06	1.46239e+06	1.55918e+06	1.78234e+06		3.87639e+06	4.34167e+06	3.36775e+06	3.06198e+06	3.1222e+06	3.02005e+06	3.19247e+06	3.50991e+06	3.44646e+06	2.808e+06	3.5363e+06	3.11322e+06	3.41779e+06	3.13363e+06	3.27773e+06
6.79	1.55146e+06	1.61271e+06	1.83945e+06	1.50561e+06	1.2755e+06	1.44876e+06	1.59306e+06	1.44521e+06	1.71615e+06	1.45514e+06	1.63715e+06	1.44779e+06	1.42036e+06	1.37107e+06	1.71765e+06		3.32607e+06	3.63763e+06	3.23536e+06	2.64442e+06	2.22314e+06	2.66098e+06	2.63756e+06	2.13741e+06	2.62607e+06	2.28559e+06	3.05174e+06	2.73674e+06	2.65744e+06	2.37964e+06	3.14568e+06
6.77	1.45507e+06	1.45081e+06	1.38825e+06	1.30381e+06	1.26294e+06	1.4241e+06	1.47892e+06	1.38905e+06	1.3827e+06	1.41386e+06	1.43244e+06	1.38777e+06	1.33989e+06	1.35926e+06	1.52318e+06		2.8106e+06	3.30632e+06	2.47308e+06	2.02402e+06	1.81257e+06	2.37717e+06	2123917	2.10932e+06	2.34557e+06	1.88479e+06	2.68619e+06	2.03819e+06	2.41608e+06	2.13335e+06	2.18736e+06
6.75	1.72127e+06	1699631	1.69903e+06	1.46865e+06	1.41326e+06	1.82319e+06	2.33157e+06	1.80844e+06	1.62568e+06	2.13698e+06	1.67109e+06	1.94919e+06	1.69082e+06	1.72435e+06	1.68871e+06		2.92646e+06	3.74401e+06	3.87197e+06	2.24588e+06	1.81605e+06	3.59237e+06	2.73496e+06	2.04023e+06	2.71301e+06	2.26397e+06	3.71383e+06	2.65229e+06	2.74572e+06	2.58069e+06	3.07755e+06
6.73	1.78796e+06	1.4266e+06	1.28821e+06	1.23405e+06	1.23522e+06	1.58492e+06	1.95053e+06	1.69537e+06	1.3059e+06	1.75184e+06	1.32714e+06	1.69145e+06	1.38809e+06	1.93767e+06	1.50423e+06		2.88785e+06	3.60179e+06	3.32663e+06	2.06601e+06	2.64128e+06	3.15892e+06	2.75006e+06	3.86576e+06	3.3061e+06	2.36239e+06	3.7427e+06	2.36575e+06	3.34673e+06	3.35929e+06	2.40927e+06
6.71	1.41541e+06	1.30998e+06	1.22207e+06	1.18287e+06	1.06287e+06	1.25817e+06	1.35226e+06	1.26512e+06	1.26401e+06	1.32963e+06	1.23654e+06	1.15612e+06	1.13332e+06	1.56312e+06	1.37066e+06		2.73549e+06	3.31225e+06	2.23013e+06	1.83608e+06	2.25857e+06	2.00655e+06	2.22602e+06	3.44742e+06	2.63598e+06	2.0076e+06	2.2699e+06	2.05521e+06	2.77226e+06	2.59786e+06	2.03873e+06
6.69	1.23588e+06	1.14677e+06	1.39105e+06	1.1372e+06	991581	1.30775e+06	1.42708e+06	1.10624e+06	1.06597e+06	1.28261e+06	1.4021e+06	1.1502e+06	1.14421e+06	1.37598e+06	1.43459e+06		2.61469e+06	3.31302e+06	2.14609e+06	1.75911e+06	1.50902e+06	2.01523e+06	1.90054e+06	1.71852e+06	1.977e+06	1.71457e+06	2.17009e+06	1.73379e+06	2.50818e+06	1.97393e+06	1.82586e+06
6.67	1.09658e+06	1.04504e+06	1.05971e+06	908952	814331	1.01209e+06	1.14483e+06	940340	982154	1.04032e+06	1.07987e+06	988013	948382	1.0085e+06	1.22555e+06		2.48483e+06	2.86171e+06	1.71183e+06	1.69448e+06	1.43975e+06	1.75945e+06	1.60153e+06	1.46728e+06	1.67592e+06	1.48021e+06	1.9944e+06	1.562e+06	1.95083e+06	1.71189e+06	1.67892e+06
6.65	1.02124e+06	950587	900822	792800	842993	931550	919695	814566	887041	890282	952014	857287	845033	815074	1.01196e+06		2.57068e+06	2.88312e+06	1.53639e+06	1.97314e+06	1.54569e+06	1.77753e+06	1.57323e+06	1.26318e+06	1.72642e+06	1.4904e+06	1.70129e+06	1.64837e+06	1.63322e+06	1.50163e+06	1.80101e+06
6.63	967017	1.01349e+06	949410	803512	864140	940620	945048	815967	867278	929705	896052	884865	799968	780036	1.03996e+06		2.52524e+06	2.88623e+06	1.49895e+06	1.93235e+06	1.4613e+06	1.72777e+06	1.57544e+06	1.16238e+06	1.72238e+06	1.42365e+06	1655424	1.64669e+06	1.51636e+06	1.46035e+06	1.77258e+06
6.61	970404	883947	847199	777313	763436	889732	876959	789452	820471	867425	907762	812492	795726	778096	1.04386e+06		2.12002e+06	2.45408e+06	1.32499e+06	1.30856e+06	1.06202e+06	1.34299e+06	1.27647e+06	1.0624e+06	1.36923e+06	1.15506e+06	1.48049e+06	1.19513e+06	1.37729e+06	1.15037e+06	1.34759e+06
6.59	961130	871399	827505	739160	755763	875706	820631	696457	777384	829917	830786	728359	689593	781026	981998		2.0002e+06	2.44416e+06	1.23767e+06	1.15505e+06	876592	1.1964e+06	1.14151e+06	957396	1.3217e+06	1.05684e+06	1.33215e+06	1.04319e+06	1.37919e+06	1.08783e+06	1.2143e+06
6.57	862959	825792	791370	744649	672550	781183	795975	719711	693017	787405	793951	746973	731381	745123	939689		1.94891e+06	2.4152e+06	1.1277e+06	1041349	780332	1.13124e+06	1.10977e+06	934844	1.2258e+06	993561	1.40858e+06	955086	1.46507e+06	1.10296e+06	1.11721e+06
6.55	810631	763666	721367	597143	579683	697144	760776	666550	637155	713952	698754	598821	654404	692127	772864		1.85683e+06	2.36642e+06	1.04685e+06	918618	717832	1.00798e+06	1.00267e+06	858495	1.15101e+06	897756	1.17458e+06	874245	1.28244e+06	1.01619e+06	1.03942e+06
6.53	716148	717610	599625	614828	620032	610733	647565	598205	645365	659088	680977	609775	701709	591315	764507		1.8518e+06	2.40543e+06	896876	867229	660474	837546	906442	767559	1.01113e+06	878970	1.12991e+06	832951	1.12289e+06	926622	961088
6.51	718464	631930	634880	613691	539852	712249	571305	619599	668416	634446	568634	554357	651229	589598	731199		3.15902e+06	3.23468e+06	1.86772e+06	2.41796e+06	1.93871e+06	1.46129e+06	2.42152e+06	904085	2.2507e+06	1.66976e+06	2.23775e+06	1.83041e+06	1.12406e+06	1.18773e+06	2.41198e+06
6.49	632718	630332	567212	526788	540708	601169	603205	521580	548745	571189	615243	517413	563685	530708	646034		1.70258e+06	2.15699e+06	816892	863617	640432	829065	920729	670997	900177	709435	1.04242e+06	782974	837643	699216	918372
6.47	563617	587298	535172	465442	446484	547775	540561	523902	506657	579394	561572	484464	475465	501115	627212		1.73008e+06	2.18336e+06	750907	824866	651982	742271	801440	570617	889054	760894	961446	720135	809951	699430	874024
6.45	535522	558609	565432	496621	396132	556682	556698	480400	528501	526629	552189	514282	480017	538017	586488		1.76134e+06	2.19948e+06	766041	771531	612713	736275	822959	519120	851517	696002	952636	713274	827569	690600	873207
6.43	495681	556563	508572	455552	442249	490191	510010	418174	485517	531292	518846	433052	473837	421461	587117		1.74309e+06	2.20833e+06	698521	754783	609025	668901	820808	488448	860318	641407	906221	719073	744792	629360	843388
6.41	497232	535385	432269	396349	410614	462992	486372	397808	476635	535745	445567	423134	447208	440072	520287		1.67709e+06	2.18432e+06	708423	715290	487965	581100	795417	427908	829992	665770	887605	613663	628529	522705	770662
6.39	484794	470826	490450	398178	346392	468987	410281	416512	426633	464330	480597	422034	424934	464284	515742		1.67257e+06	2.178e+06	592329	648725	531599	575014	697771	452584	752529	568630	816975	580190	651008	493812	722400
6.37	484488	469889	432876	427299	373363	453594	366686	389541	452298	438824	441008	399774	437958	384487	544312		1.61219e+06	2.08885e+06	529674	634655	452528	530292	727167	332734	684198	500347	819323	520067	522694	426752	636348
6.35	422633	418654	389640	459861	362523	435269	350596	380479	427950	430190	432474	373150	343690	376565	466260		1.60351e+06	2.11794e+06	570852	599829	406227	538301	651910	303914	658626	443912	781046	490059	517204	430146	682815
6.33	441772	491533	472396	428319	345393	422900	395322	410714	422904	459537	500195	384297	414574	384518	475138		1.63486e+06	2.17666e+06	523840	611667	463648	558682	716438	272185	650612	485762	756252	537463	525743	419053	667054
6.31	466797	434036	435627	428807	295139	457122	410897	382407	451879	444537	464896	341397	354435	445783	500902		1.6798e+06	2.23176e+06	493282	662482	580143	506452	727793	419492	708950	478653	796730	515636	479638	464933	669264
6.29	428474	434810	402353	437881	342453	445555	321384	385087	417507	358144	403228	303184	385128	319582	465095		1.76033e+06	2.25917e+06	536795	726058	567969	487615	651965	313550	634898	424102	832883	475350	475250	397271	738403
6.27	401692	418620	340177	388950	280558	343020	314396	346226	397091	396872	392395	314313	307766	363954	495031		2.32648e+06	2.77558e+06	549476	1.60937e+06	1.05413e+06	592327	1.04428e+06	397939	999952	774402	853326	974392	477217	404427	1.27678e+06
6.25	387426	454244	408684	415240	249113	433546	269209	272188	390213	411634	463281	333453	387807	365971	489129		2.93317e+06	3258469	580064	2.5713e+06	1.79622e+06	727293	1.52444e+06	357266	1.45603e+06	1.13339e+06	826264	1.47457e+06	474680	476671	1.86706e+06
6.23	384531	418856	413311	377275	288236	425601	343747	310369	460441	361819	408464	358549	342410	378267	523719		2.35647e+06	2.73984e+06	567119	1.80164e+06	1.28577e+06	616766	1.2292e+06	320846	1.09967e+06	958418	879796	1.1602e+06	470871	513676	1.37501e+06
6.21	348775	352652	356553	375847	272677	405436	289588	311073	385312	388875	385112	250556	308121	337555	446281		1.65153e+06	2.2041e+06	503693	683058	463215	516470	647796	193890	621729	464972	758023	500466	362155	301488	683287
6.19	377514	411930	561130	502271	345023	392829	413979	288875	523134	474288	566555	429220	444270	350726	669104		1.8375e+06	2.3902e+06	694389	742902	341956	614900	723692	167550	592438	581822	902826	632172	521129	415165	860923
6.17	382602	420453	474221	440941	291070	403624	355461	349883	517090	406075	439203	304115	388205	333449	611693		1.97302e+06	2.47371e+06	709287	878407	551670	613055	756683	272405	705154	543342	951098	666557	426923	408645	1.01781e+06
6.15	384851	460214	520325	592470	267243	414487	345132	345709	482270	405093	445421	347731	407114	394477	622093		3.03383e+06	3.39383e+06	901364	2.10638e+06	1.38036e+06	985333	1.38147e+06	395809	1.23572e+06	1.12558e+06	1.11184e+06	1.43006e+06	511240	497890	1.89045e+06
6.13	547589	621615	1.06352e+06	1.32813e+06	414627	641804	516075	611627	825735	596306	812357	590401	738490	604436	1.2021e+06		3.80385e+06	3.84413e+06	2.75266e+06	3.00968e+06	1.78518e+06	3.49534e+06	1.90314e+06	755262	1.57021e+06	2.07749e+06	2.76843e+06	2.32826e+06	699437	936403	2.95209e+06
6.11	506421	454544	565429	607247	338314	539324	415911	437969	580712	492225	637680	476772	542000	433794	768177		2.38934e+06	2.79589e+06	921304	1.75103e+06	1.37468e+06	901844	1.24765e+06	504136	1.14797e+06	858923	1.30743e+06	1196836	526487	592786	1.4984e+06
6.09	728203	741546	872316	894897	489460	770456	620992	814274	855571	771863	1.05435e+06	676148	737562	750138	1.16713e+06		2.50145e+06	2.96149e+06	2.07496e+06	1.64789e+06	1.1341e+06	1.43997e+06	1.38628e+06	1.53884e+06	1.21537e+06	998267	2.49555e+06	1.44428e+06	838670	1.4451e+06	1.97453e+06
6.07	601388	662988	825791	790313	467514	812631	564327	622858	919592	676568	962142	600306	711202	672421	1.19773e+06		2.00132e+06	2.62638e+06	940660	1.06809e+06	974212	932176	1.01196e+06	854336	911781	670963	1.57094e+06	859234	688345	944492	1.12212e+06
6.05	728703	783347	863886	902740	540326	898037	687190	789209	1.19268e+06	771689	1.14818e+06	757453	942822	865605	1.41125e+06		2.08339e+06	2.67391e+06	923373	1.07917e+06	1.13366e+06	906266	1.13953e+06	1.12932e+06	1.08189e+06	624018	1.67424e+06	875080	825135	1.22871e+06	1.16616e+06
6.03	510086	622226	622738	627506	383906	677952	496113	450831	775021	524872	798549	491810	614586	556356	833170		1.89189e+06	2.44741e+06	687050	902724	713428	646584	870774	613875	800670	468374	1.26261e+06	675216	551553	653978	988585
6.01	548847	641934	669378	722875	434344	640970	514212	536091	895521	614727	886223	565388	682649	516616	904217		2.03504e+06	2.64609e+06	777004	1.03929e+06	885285	778906	878204	731824	748473	549920	1.2961e+06	744912	565991	757749	1.0579e+06
5.99	677504	821905	1.11056e+06	1.48096e+06	494751	818874	716904	615283	1.11533e+06	788590	1.13393e+06	999096	910244	660372	1.26194e+06		2.59484e+06	3.18307e+06	2.19556e+06	1.439e+06	794689	2.08753e+06	1.08851e+06	841704	1.03613e+06	1.02072e+06	3.09675e+06	1.32189e+06	982765	1.13309e+06	1.63862e+06
5.97	836753	895642	1.24261e+06	1.48097e+06	667963	922724	826280	872760	1.47032e+06	900033	1.35759e+06	1.05707e+06	1.0361e+06	834092	1.59671e+06		2.62577e+06	3.23023e+06	2.46669e+06	1.66475e+06	1.19557e+06	2.3953e+06	1.29832e+06	1.27183e+06	1.25736e+06	1.07047e+06	3.33417e+06	1.52603e+06	1.21183e+06	1.60072e+06	1.946e+06
5.95	826309	944145	1.12925e+06	1.23952e+06	674033	1.06886e+06	887648	931279	1.42424e+06	945532	1462654	970992	1.06336e+06	740710	1.57251e+06		2.49207e+06	3.13814e+06	1.51498e+06	1.53052e+06	1.27105e+06	1.46894e+06	1.34672e+06	1.23783e+06	1.18796e+06	837186	2.27676e+06	1.23795e+06	935306	1.39302e+06	1.60621e+06
5.93	1.02261e+06	1.24739e+06	1.44014e+06	1.55903e+06	1.0105e+06	1.47834e+06	1.10767e+06	1.32415e+06	1.70785e+06	1.23095e+06	1.78873e+06	1.20874e+06	1.47949e+06	1.16081e+06	2.03077e+06		2.48837e+06	3.3055e+06	1.38435e+06	1.60868e+06	2.11301e+06	1.40995e+06	1.77679e+06	1.99358e+06	1.64361e+06	880970	2.44644e+06	1.36548e+06	1.16622e+06	2.05319e+06	1.59537e+06
5.91	1.50856e+06	1.39562e+06	1.2349e+06	1.37184e+06	1.35223e+06	1.91224e+06	1.3045e+06	2.08691e+06	1.52257e+06	1.65239e+06	1.65033e+06	1.48521e+06	1.23766e+06	1.28112e+06	1.54224e+06		2.69376e+06	3.36667e+06	1.7467e+06	1.64946e+06	2.79473e+06	1.56716e+06	1.7202e+06	6.34095e+06	1.73067e+06	946452	2.75477e+06	1.45455e+06	2.54985e+06	4.41778e+06	1.88137e+06
5.89	1.66564e+06	1.5185e+06	1.44587e+06	1.62725e+06	1.43697e+06	2.20743e+06	1.52666e+06	2.21722e+06	2.01501e+06	1.83752e+06	2.14081e+06	1.6814e+06	1.55976e+06	1.55114e+06	2.11147e+06		2.82616e+06	3.56704e+06	2.008e+06	1.83063e+06	3.07329e+06	1.79198e+06	1.99402e+06	6.68666e+06	1.96191e+06	987118	3.17173e+06	1.56891e+06	2.7331e+06	4671614	2.07754e+06
5.87	1.02776e+06	1.20355e+06	1.34664e+06	1.41325e+06	876672	1.34036e+06	1.04331e+06	1.23011e+06	1.85844e+06	1.17722e+06	2.08237e+06	1.24771e+06	1.36079e+06	1.02705e+06	2.06423e+06		2.57771e+06	3.25518e+06	1.47533e+06	1.61728e+06	1.82184e+06	1.45842e+06	1.57591e+06	2.61446e+06	1.35374e+06	837718	2.42906e+06	1.32966e+06	1.3956e+06	2.18798e+06	1.69447e+06
5.85	824905	989825	1.14471e+06	1.24634e+06	765861	1.12105e+06	945943	931256	1.55561e+06	1.02352e+06	1.71704e+06	1.06828e+06	1.13646e+06	904090	1.64308e+06		2.77116e+06	3.42701e+06	1.39497e+06	1.89084e+06	1.67739e+06	1.48482e+06	1.57003e+06	1.48814e+06	1.41843e+06	944760	2.20617e+06	1.47564e+06	1.12445e+06	1.595e+06	1.87389e+06
5.83	778280	1.01972e+06	1.08758e+06	1.18307e+06	746625	1.04164e+06	840036	900099	1.45877e+06	948522	1.55341e+06	949128	1.11912e+06	783215	1.58057e+06		2.787e+06	3.40309e+06	1.2896e+06	1.93927e+06	1.58046e+06	1.40763e+06	1.52356e+06	1.22706e+06	1.3978e+06	1.02398e+06	2.02659e+06	1.45479e+06	916087	1.38961e+06	1.86853e+06
5.81	879173	1.10694e+06	1.18443e+06	1.24012e+06	818108	1.07322e+06	882742	955914	1.53316e+06	1.02193e+06	1.63704e+06	1.05851e+06	1.16531e+06	900856	1.62564e+06		3.57274e+06	4.0102e+06	1.56708e+06	3.28211e+06	2.78949e+06	1.74555e+06	2.28187e+06	1.50453e+06	2.14199e+06	1.59099e+06	2.2764e+06	2.30067e+06	1.08848e+06	1.6414e+06	2.67502e+06
5.79	2.15202e+06	2.3782e+06	1.62182e+06	1.77609e+06	1.95725e+06	2.64094e+06	2.13521e+06	2.85097e+06	1.93271e+06	2.50722e+06	2.12612e+06	2.14578e+06	2.12025e+06	2.6178e+06	2326845		4.11174e+06	4.47995e+06	2.32022e+06	3.60686e+06	5.63838e+06	2.30529e+06	3.31329e+06	4.57291e+06	3.59156e+06	2.31313e+06	3.08552e+06	2.8908e+06	2.3077e+06	3.06163e+06	3.23324e+06
5.77	957457	1.05597e+06	1.02783e+06	1.11278e+06	757150	1.14663e+06	861365	1.04513e+06	1.23871e+06	1.0794e+06	1.43317e+06	996234	1.07983e+06	941870	1.4453e+06		2.36653e+06	2862363	1.27247e+06	1.52075e+06	1.76966e+06	1.14813e+06	1373118	1.71614e+06	1.40035e+06	872837	1.83708e+06	1.25939e+06	953872	1.31974e+06	1.43697e+06
5.75	702811	824607	875498	911143	555411	818461	731996	634323	1.04947e+06	815450	1.08879e+06	755613	822115	674004	1.10324e+06		2.10515e+06	2.65678e+06	1.02918e+06	1.1709e+06	1.0024e+06	953623	1.0566e+06	912546	981604	699769	1.54085e+06	1.0324e+06	636096	837805	1.25694e+06
5.73	579025	756758	775391	823398	515704	752673	579073	556801	900631	689274	968721	669322	681329	568042	1.01484e+06		2.01847e+06	2.60337e+06	983398	1.07022e+06	861272	828072	977180	655992	835743	724020	1.39372e+06	915701	557447	717659	1.10744e+06
5.71	496043	604285	642637	710154	477905	587309	516468	480632	765183	623198	761191	534175	636122	486973	747424		1.98543e+06	2.5198e+06	836106	986686	643598	750364	771606	466775	784625	636494	1.24487e+06	807030	382094	513069	1.06935e+06
5.69	452316	561101	616473	615203	391997	566188	437738	425754	654265	603428	703493	452878	518455	479040	697436		2.15037e+06	2.62808e+06	1.20434e+06	1.13808e+06	786935	827774	908006	448455	985975	815770	1.26105e+06	1.14804e+06	416249	411312	1.36024e+06
5.67	431475	482060	524515	540426	371921	500132	354830	373015	487558	540679	580257	386930	459284	414262	576267		1.83059e+06	2.48218e+06	739792	740567	520005	596797	662568	282036	632140	473448	956268	604421	278473	297898	839837
5.65	432311	496214	535177	509267	370205	512919	422246	352696	585443	527458	623803	435395	461976	386390	571578		1.85974e+06	2.50326e+06	792933	755111	507082	599661	651152	326091	676492	470597	946069	586573	303404	343832	857922
5.63	463603	498548	531019	490816	287050	500604	343990	312245	539529	501642	568781	421696	354918	481730	548428		2.08151e+06	2.72652e+06	816690	931612	628818	674885	773612	424757	764839	552348	1.19983e+06	731569	442901	449007	1.09754e+06
5.61	1.60059e+06	2.22461e+06	2.55685e+06	2.74273e+06	1.46183e+06	2.11114e+06	1.94825e+06	1.86939e+06	2.40742e+06	2.20795e+06	2.74509e+06	2.23955e+06	1.98232e+06	2.15161e+06	3.04003e+06		3.8292e+06	4.67873e+06	2.33673e+06	3.03208e+06	2.99433e+06	2.1022e+06	2.83467e+06	2.39784e+06	2.62693e+06	2.09804e+06	2.64174e+06	2.64995e+06	1.87461e+06	2.41392e+06	3.25465e+06
5.59	449064	469374	443477	499232	297650	460425	348327	315653	404525	455173	482371	358136	375907	371380	541898		1.80642e+06	2.27133e+06	589707	761135	438876	529729	593423	172024	632145	477751	783342	624932	265428	201420	755420
5.57	361782	354637	350806	303826	213853	324214	309579	221077	384486	367089	343316	283642	276123	310366	346480		1.83496e+06	2.30747e+06	512225	577378	400500	357679	556881	142409	513561	487547	706495	486239	164190	180237	689851
5.55	339162	403262	343472	319554	223277	337509	275432	246872	268210	327246	318567	323065	319074	275604	346959		1.78368e+06	2.40403e+06	620288	661502	319954	442671	574611	98899.7	512503	377912	764517	496245	209869	94764.9	774438
5.53	352456	399473	341402	287519	191080	303799	223932	192906	298566	297214	340590	179385	233602	259370	356002		1.80998e+06	2.4146e+06	564018	688816	390005	467507	585967	79175.1	545876	435277	787959	500965	174267	130545	759242
5.51	313012	335821	374145	353155	200979	323659	197155	226556	335032	361793	347025	230803	249182	311953	374529		1.85093e+06	2.43991e+06	665497	691244	326999	600284	586102	77065	566570	398691	765107	474927	126791	108574	820241
5.49	455734	365851	294899	293625	230841	398251	252916	237181	302092	357189	322995	215295	290806	337451	318268		1.83003e+06	2.542e+06	534591	741412	427801	542753	613541	95341.7	628055	526614	744425	439501	315638	145937	803082
5.47	339249	297611	319862	324955	160935	341580	235361	230786	314881	360039	371285	233065	225424	305357	318702		1.95774e+06	2.63264e+06	625721	704233	633942	493049	680187	225620	694494	467654	734549	503472	245940	258307	802156
5.45	330429	326865	288419	250652	231620	368784	274245	149924	340377	393071	308757	253363	209104	320741	352519		2.06901e+06	2.76126e+06	691315	711544	776438	589055	770938	384039	795926	525143	837302	554187	326554	299381	844643
5.43	354257	399643	324879	233825	177017	358791	260407	180041	306860	386966	314527	277137	236445	372417	334198		2.60665e+06	3.26118e+06	1.11916e+06	1.18475e+06	1.3202e+06	920458	1.26979e+06	924518	1.26293e+06	924498	1.21792e+06	885731	572324	789261	1.34538e+06
5.41	373032	488289	369207	297249	205171	511611	388754	306063	354578	461279	436448	484948	350495	625655	368771		6.02614e+06	6.10368e+06	4.26324e+06	5.60817e+06	9.86445e+06	3.49178e+06	6.37878e+06	4.5371e+06	5.34033e+06	3248982	3.5851e+06	4.98433e+06	2.28574e+06	4.35988e+06	4.10769e+06
5.39	456513	474408	351535	273855	245363	543283	377134	267379	383646	404539	488746	458912	401144	626837	356923		4.01282e+06	4.28378e+06	2.94435e+06	2.90235e+06	4.50544e+06	2.45526e+06	3.53352e+06	3.15804e+06	3.47795e+06	2.48749e+06	2.51989e+06	2.46429e+06	1.95125e+06	2.83794e+06	3.10172e+06
5.37	487097	516163	501641	500300	374161	640093	555999	451067	456031	605124	581014	670191	548935	792358	494117		3.95526e+06	4.39323e+06	3.2768e+06	2.75171e+06	3.73954e+06	2.60442e+06	3.43008e+06	3172296	3.36248e+06	2.63284e+06	2.71819e+06	2.50114e+06	1.96611e+06	2.94418e+06	3.20593e+06
5.35	512935	478115	377043	362634	311035	610531	572187	338464	489665	567361	490297	525468	462844	704823	520590		3.28478e+06	3.8941e+06	2.87744e+06	2.1478e+06	2.66491e+06	2.32975e+06	2.62826e+06	2.45242e+06	2.52115e+06	2.19298e+06	2.3911e+06	1.89877e+06	1.7114e+06	2.33611e+06	2.6606e+06
5.33	610680	584658	377894	369282	285856	615693	716611	322559	493421	519855	612711	556541	437287	608761	535217		2.82776e+06	3.41086e+06	2.44777e+06	1.59867e+06	1.67725e+06	1.91989e+06	1.82135e+06	1.59193e+06	1.79017e+06	1.77822e+06	2.319e+06	1.34585e+06	1.52685e+06	1.55527e+06	2.02365e+06
5.31	754864	696605	467401	402303	377907	605214	797020	364763	521137	581944	675032	558622	463444	461615	563646		2.58035e+06	3.22345e+06	2.31896e+06	1.22373e+06	900386	1.97556e+06	1.38103e+06	960160	1.15581e+06	1438924	2.33835e+06	1.03253e+06	1.70324e+06	1.22948e+06	1.59023e+06
5.29	570227	613844	420706	429401	244447	461650	681535	247523	459941	565653	617622	444229	398338	371681	524203		2.37189e+06	3.12671e+06	1.72622e+06	874892	627582	1.35342e+06	1.06161e+06	480956	999322	1.09421e+06	1.73022e+06	795682	1.32823e+06	834288	1.20498e+06
5.27	469807	541731	384577	438214	201649	401061	650388	166593	419405	476685	556696	389955	370517	363810	506361		2.35617e+06	3.17211e+06	1.53099e+06	812907	464672	1.1038e+06	913894	256598	896187	969097	1.43967e+06	697135	1.1395e+06	742848	1.08184e+06
5.25	506027	660095	956038	696394	482132	523892	772155	393265	602400	942612	693177	685648	440600	398405	570886		3.29586e+06	4.17516e+06	2.55401e+06	1.72598e+06	925840	1.78628e+06	1.73215e+06	784696	1.79926e+06	1.60477e+06	3.58202e+06	1.94681e+06	1.63838e+06	1.23272e+06	2.25986e+06
5.23	1.11664e+06	1.90585e+06	1.333e+06	1.04188e+06	1.61203e+06	1.79195e+06	1.8786e+06	1.5019e+06	723035	2.34657e+06	1.21698e+06	2.44244e+06	1.5993e+06	2.50801e+06	958851		6.14753e+06	6.97714e+06	7.47744e+06	4.47174e+06	6.14022e+06	6.42621e+06	6.2502e+06	6.449e+06	6.32177e+06	4.98673e+06	7.0848e+06	5.05247e+06	6.64948e+06	7.01647e+06	5.90355e+06
5.21	533741	800240	379394	392881	375316	621814	615963	359331	381011	698448	521574	605254	500959	694710	493401		2.41584e+06	2.9041e+06	1.81859e+06	1.27599e+06	1.18844e+06	1.71368e+06	1.4603e+06	1.1828e+06	1.74508e+06	1.37339e+06	2.0624e+06	1.22983e+06	1.82285e+06	1.42964e+06	1.42498e+06
5.19	498507	635826	353250	303948	403776	509483	604806	366473	322440	676189	365425	490684	362316	388178	424047		2.02749e+06	2.77484e+06	1.35777e+06	708118	525408	785901	1.04718e+06	1.03115e+06	1.06751e+06	715727	1.9533e+06	666894	1.1293e+06	887096	863587
5.17	317137	375354	213822	234118	179062	330941	282901	180057	237543	368490	294218	210873	256148	356989	303473		1.86638e+06	2.47269e+06	522337	533679	329550	479876	595989	293823	635504	381268	903791	433882	468934	339205	644020
5.15	251800	292469	181211	158547	62333.4	236723	221182	181595	133309	280864	187950	199828	199632	266972	295198		1.79653e+06	2.4426e+06	428297	418818	308974	261015	534202	130164	471183	381109	677461	325335	332546	195245	592183
5.13	196127	281552	165609	114550	91057.5	245095	206331	141822	142089	351799	204475	206478	152281	284019	310012		1.79657e+06	2.52772e+06	319693	489050	258552	254717	548713	133849	492718	337533	596501	295838	246027	188856	543507
5.11	210557	258554	137707	98068.7	92431	252543	129200	127311	162204	240679	114425	178954	148812	279510	238239		1.77031e+06	2.49769e+06	301661	469819	340510	230823	485798	82018.1	564962	324800	592952	267588	216397	152451	572892
5.09	202324	261031	131191	126735	35177.9	237700	128480	85470.7	71702.5	245724	127181	94390.6	123552	221173	236504		1.84e+06	2.51131e+06	187722	408299	275433	174140	500758	-31288.1	463884	251883	539232	201084	158400	-1114.9	474910
5.07	178131	190674	56018.6	115540	8867.23	211604	88887.1	90873.2	126800	221940	89211.1	43915.5	104104	219160	184295		1.71883e+06	2.45575e+06	211269	369251	133270	143403	384328	-166630	375597	182433	453688	133546	-39810.2	-95740.2	462414
5.05	125354	219145	99559.7	120691	14832.7	184913	25235.8	-1326.82	141337	251465	174278	28718.4	87138.3	170575	215098		1.66531e+06	2.49353e+06	161554	266749	15319.9	95123.8	324125	-194522	351194	164594	455641	48127.8	-33802.2	-117348	387325
5.03	123925	227195	102055	110287	-54302.9	138313	-14646.9	-6861.21	32879.9	181802	125043	12403.6	28480	195516	166169		1.64929e+06	2.45824e+06	86213.3	193226	-52071.4	40774.1	270532	-240962	269200	163730	427166	-14158.5	-125627	-146312	360107
5.01	95112.5	157931	47385.9	59598.7	-42004.6	110642	-975.3	9675.73	51420.2	195381	109726	17803.1	68318.6	73553.4	119216		1.66762e+06	2.48337e+06	47061.6	165423	-100212	52723.5	329259	-230690	247061	45544.2	421803	-34264.8	-196339	-190410	363735
4.59	368602	512190	408055	376354	163510	465853	255836	239173	346610	494636	436908	271692	326149	394853	503874		2.74372e+06	3.79056e+06	663234	881745	387488	536063	901233	39277.1	895392	564132	1.28074e+06	567445	223390	129610	1.06263e+06
4.57	474020	668270	510580	447067	277309	541988	366235	285219	451953	579992	520078	336596	426263	405776	593588		2.92578e+06	3.93105e+06	754140	986336	482990	626446	984518	122650	999652	633600	1.38997e+06	745314	301514	167779	1.15843e+06
4.55	552091	716548	577814	540571	351099	628007	413220	381205	575709	664165	653648	421606	580492	523201	707507		2.93517e+06	4.0629e+06	896627	1.01181e+06	498104	779234	992559	217465	1.0144e+06	612316	1.49067e+06	663820	459677	334866	1.19398e+06
4.53	561302	750443	679459	633912	399910	646373	443951	440780	695079	660859	755484	520920	560904	590226	843009		3.14239e+06	4.32952e+06	992498	1.15932e+06	672779	944100	1.14122e+06	350447	1.14997e+06	714972	1.65535e+06	786695	517413	440588	1.31659e+06
4.51	719874	875675	846097	827215	417202	780502	613486	595525	833431	800437	873483	574309	700362	717135	1.00744e+06		3.50343e+06	4.63592e+06	1.31918e+06	1.4056e+06	859931	1.25012e+06	1.3273e+06	578477	1.36022e+06	983680	1.98414e+06	1.13755e+06	620802	644510	1.70754e+06
4.49	861642	1.06547e+06	1.04573e+06	1.0309e+06	709231	974477	793955	750533	1.00616e+06	992810	1.12172e+06	824948	871637	870039	1.21351e+06		3.91653e+06	5.03532e+06	1.77166e+06	1.90182e+06	1.20248e+06	1.6757e+06	1.67769e+06	828225	1.61778e+06	1.24483e+06	2.3849e+06	1.42144e+06	966198	933663	2.1399e+06
4.47	1.0335e+06	1.15075e+06	1.14627e+06	1.10463e+06	781635	1.10836e+06	942650	901996	1.18467e+06	1.1698e+06	1.19166e+06	942872	1.02189e+06	922774	1.3015e+06		4.00448e+06	5.23343e+06	1.73775e+06	2.01797e+06	1.32921e+06	1.59928e+06	1.83504e+06	966712	1.86647e+06	1.34603e+06	2.50227e+06	1.57239e+06	1.1746e+06	1.04939e+06	2.14978e+06
4.45	1.11683e+06	1.29282e+06	1.25929e+06	1.22618e+06	775196	1.2371e+06	929327	972720	1.29325e+06	1.22306e+06	1.40815e+06	1.0109e+06	1.09636e+06	983215	1.50203e+06		4.27313e+06	5.44619e+06	1.95434e+06	2.21738e+06	1.49992e+06	1710267	2.00918e+06	1.0733e+06	2.03165e+06	1.47511e+06	2.68938e+06	1.66245e+06	1.26378e+06	1.23014e+06	2.29764e+06
4.43	1.31404e+06	1.44119e+06	1.5113e+06	1.37998e+06	952664	1.37124e+06	1.17253e+06	1.08807e+06	1.55747e+06	1.36821e+06	1.58498e+06	1.1501e+06	1.23954e+06	1.15473e+06	1.6937e+06		5.01727e+06	6.18649e+06	2.6885e+06	2.91736e+06	2.07e+06	2.30653e+06	2.67942e+06	1.49558e+06	2.63041e+06	2.0384e+06	3.42415e+06	2.39135e+06	1.70416e+06	1.6421e+06	3.13597e+06
4.41	1.50704e+06	1.70576e+06	1.7653e+06	1.64841e+06	1.18322e+06	1.66361e+06	1.33788e+06	1.3168e+06	1.80567e+06	1.6061e+06	1.83144e+06	1.38242e+06	1.5244e+06	1.3895e+06	2015229		5.26759e+06	6.56024e+06	3.08062e+06	3.1543e+06	2.35736e+06	2.73523e+06	2.86261e+06	1.80095e+06	2.88238e+06	2.26297e+06	3.98288e+06	2.6626e+06	2.00146e+06	2.04037e+06	3.32382e+06
4.39	1.56974e+06	1.79996e+06	1.82246e+06	1.72186e+06	1.2585e+06	1.71676e+06	1.4448e+06	1.33142e+06	1.93752e+06	1657488	2.00621e+06	1.48876e+06	1.6228e+06	1.44611e+06	2.10864e+06		5.32263e+06	6.57124e+06	3.01759e+06	3.12653e+06	2.27318e+06	2.64077e+06	2.9004e+06	1.78143e+06	2.91644e+06	2.20185e+06	3.79305e+06	2.52637e+06	2.0108e+06	2.07325e+06	3.27249e+06
4.37	1.80323e+06	1.95062e+06	2.19991e+06	2.06005e+06	1.40841e+06	1.87292e+06	1.61627e+06	1.56274e+06	2.25858e+06	1.78382e+06	2.2127e+06	1.63926e+06	1.77456e+06	1.63833e+06	2.38707e+06		5.89809e+06	7.21419e+06	3.75622e+06	3.60243e+06	2.53491e+06	3.54253e+06	3.21926e+06	1.9528e+06	3.15449e+06	2.67418e+06	4.4693e+06	3.02659e+06	2.30391e+06	2.24913e+06	3.95561e+06
4.35	2.27297e+06	2.34556e+06	2.66671e+06	2.62182e+06	1.85508e+06	2.47144e+06	2.07955e+06	2.26602e+06	2.77106e+06	2.31094e+06	2.75661e+06	2.17119e+06	2.16853e+06	2.06756e+06	2.91259e+06		6.77758e+06	7.99125e+06	4.70685e+06	4.32972e+06	3.4783e+06	4.39624e+06	3.96714e+06	4.00791e+06	3.87789e+06	3.25124e+06	5.6748e+06	3.73369e+06	3.30932e+06	3.72947e+06	4.69402e+06
4.33	2.35414e+06	2.50246e+06	2.87984e+06	2.80463e+06	1.863e+06	2.4584e+06	2.17883e+06	2.13607e+06	3.01891e+06	2.39071e+06	3.0734e+06	2.27443e+06	2.41033e+06	2.02156e+06	3.12182e+06		7.40652e+06	8.68981e+06	4.83764e+06	4.75938e+06	3.95483e+06	4.39216e+06	4.57648e+06	3.55972e+06	4.44905e+06	3.755e+06	5.80809e+06	4.14068e+06	3.61063e+06	3.6518e+06	5.13984e+06
4.31	2.47262e+06	2.79083e+06	3.12518e+06	2.97926e+06	2.07975e+06	2.6286e+06	2.49332e+06	2241761	3.38853e+06	2.58772e+06	3.43169e+06	2.41707e+06	2.61466e+06	2.20173e+06	3.53565e+06		8.98951e+06	9.97086e+06	5.60604e+06	6.30475e+06	5.2086e+06	5.04198e+06	6.04969e+06	3.27433e+06	5.80975e+06	4.92931e+06	6.93144e+06	5.39971e+06	3.9602e+06	3.93165e+06	6.7655e+06
4.29	2.90559e+06	3.12342e+06	3.22317e+06	3.1635e+06	2.37342e+06	3.05657e+06	2.73265e+06	2.73494e+06	3.6578e+06	2.95456e+06	3.61517e+06	2.70558e+06	2.9472e+06	2.58725e+06	3.72666e+06		1.02133e+07	1.05682e+07	8.48398e+06	7.84191e+06	6.68728e+06	7.44832e+06	8.37598e+06	4.30036e+06	7.3984e+06	6.56724e+06	9.26028e+06	6.64593e+06	4.75231e+06	5.1745e+06	8.04235e+06
4.27	3.09277e+06	3.44495e+06	3.94706e+06	3.68551e+06	2.65026e+06	3.32176e+06	3.08001e+06	3.07083e+06	4.07317e+06	3.244e+06	4.10429e+06	3.04826e+06	3.26664e+06	2.869e+06	4.26695e+06		9.4149e+06	1.04907e+07	6.83023e+06	6.9048e+06	5.72528e+06	6.18828e+06	6.63855e+06	4.56637e+06	6.36432e+06	5.30599e+06	7.8837e+06	6.0139e+06	4.79533e+06	4.96324e+06	7.1602e+06
4.25	4.8923e+06	4.77706e+06	5.85521e+06	5.57601e+06	4.42259e+06	5.73036e+06	5.42931e+06	6.03674e+06	5.75783e+06	4.9352e+06	5.90008e+06	5.42318e+06	5.26215e+06	5734191	6.88782e+06		1.13678e+07	1.26801e+07	9.22342e+06	9.04949e+06	1.00418e+07	8.59652e+06	9.01207e+06	9.82485e+06	9.73925e+06	7.07762e+06	1.12011e+07	7.63751e+06	7.81231e+06	8.72916e+06	9.25908e+06
4.23	4.82919e+06	4.55289e+06	5.19678e+06	5.03114e+06	4298535	5.63234e+06	5.08199e+06	5.74868e+06	5.33425e+06	4.76094e+06	5.53931e+06	5.08388e+06	4.87185e+06	5.34332e+06	6.35529e+06		1.08755e+07	1.20503e+07	8.34188e+06	8.60158e+06	9.69925e+06	7.71523e+06	8.6026e+06	1.0495e+07	9.44184e+06	6.65261e+06	9.85518e+06	7.27704e+06	7.76436e+06	8.87173e+06	8.60835e+06
4.21	3.86113e+06	4.14033e+06	4.37242e+06	4.35276e+06	3.28983e+06	4.50043e+06	3.83371e+06	4.14938e+06	4.87276e+06	4.08639e+06	4.90079e+06	4.07728e+06	3.97102e+06	4.05911e+06	5.24427e+06		1.02767e+07	1.16181e+07	6.57871e+06	7.68022e+06	7.71185e+06	6.03842e+06	7.36088e+06	7.28868e+06	7.65194e+06	5.58398e+06	8.1054e+06	6.50181e+06	5.77562e+06	6.47764e+06	7.86611e+06
4.19	3.87925e+06	3.94448e+06	4.33059e+06	4.37852e+06	3.07322e+06	4.19183e+06	3.60592e+06	3.84003e+06	4.99295e+06	3.7292e+06	4.93796e+06	3.87378e+06	4.02625e+06	3.89957e+06	5.29457e+06		1.051e+07	1.19581e+07	6.90829e+06	7.76704e+06	7.18034e+06	6.4002e+06	7.13127e+06	5.61627e+06	7.29991e+06	5.57988e+06	8.23093e+06	6.46801e+06	5.38435e+06	5.48734e+06	7.96259e+06
4.17	1.10287e+07	1.27086e+07	1.3883e+07	1.13645e+07	1.14046e+07	1.27871e+07	1.23934e+07	9.178e+06	1.17352e+07	1.00092e+07	1.19569e+07	1.10063e+07	9.78817e+06	7.45976e+06	1.34732e+07		1.93427e+07	2.04968e+07	1.64393e+07	1.63863e+07	1.2357e+07	1.56149e+07	1.4741e+07	9.25898e+06	1.52965e+07	1.35805e+07	1.70103e+07	1.43243e+07	1.13208e+07	1.2305e+07	1.6944e+07
4.15	1.22756e+07	1.26746e+07	1.29141e+07	1.1934e+07	1.22705e+07	1.35959e+07	1.21241e+07	9.13313e+06	1.12811e+07	1.00683e+07	1.16289e+07	1.11529e+07	1.00189e+07	7.21006e+06	1.35317e+07		1.8572e+07	1.93326e+07	1.55241e+07	1.60242e+07	1.16047e+07	1.48804e+07	1.42226e+07	9.01455e+06	1.53522e+07	1.32481e+07	1.60236e+07	1.42889e+07	1.10196e+07	1.17841e+07	1.56799e+07
4.13	9.13942e+06	9.3327e+06	1.02317e+07	8.22882e+06	8.81637e+06	1.19263e+07	1.11429e+07	1.29254e+07	1.02361e+07	9.19282e+06	1.01293e+07	1.01618e+07	9.2366e+06	1.21053e+07	1.09487e+07		2.30704e+07	2.25295e+07	1.66782e+07	2.18265e+07	2.87871e+07	1.47592e+07	1.88111e+07	2.48046e+07	2.08043e+07	1.52627e+07	1.76876e+07	1.57303e+07	18019091	1.97828e+07	2.00882e+07
4.11	7.24707e+06	6.98703e+06	7.12537e+06	6.32226e+06	6.3131e+06	8.58953e+06	7.58692e+06	8.92871e+06	7.54722e+06	6.92943e+06	7.49856e+06	6983399	6.67112e+06	9.00061e+06	8.06953e+06		1.76532e+07	1.85604e+07	1.23888e+07	1.58468e+07	1.9145e+07	1.16569e+07	1.45097e+07	1.66291e+07	1.64001e+07	1.25073e+07	1.38632e+07	1.25887e+07	1.26004e+07	1.3247e+07	1.47978e+07
4.09	6.27672e+06	7.27858e+06	7.53605e+06	6.95827e+06	5.84737e+06	7.18705e+06	7.01832e+06	6.7878e+06	7.87196e+06	6.93979e+06	7.95175e+06	7.15565e+06	6.67237e+06	7.46844e+06	8.60252e+06		1.58189e+07	1.74484e+07	1.16524e+07	1.36955e+07	1.3442e+07	1.12302e+07	1.32377e+07	1.12062e+07	1.39061e+07	1.08167e+07	1.36929e+07	1.16191e+07	1.21438e+07	1.18547e+07	1.4042e+07
4.07	8.18853e+06	8.95452e+06	9.3129e+06	8.00874e+06	7.90478e+06	9.29033e+06	8357160	9.51254e+06	1.01871e+07	8.44941e+06	9.58192e+06	8.53949e+06	8.30023e+06	8.9782e+06	9.94626e+06		1.81013e+07	1.95011e+07	1.4715e+07	1.67943e+07	1.7513e+07	1.40985e+07	1.47489e+07	1.61222e+07	1.52988e+07	1.20887e+07	1.66249e+07	1.35943e+07	1.33306e+07	1.44046e+07	1.64149e+07
4.05	1.96975e+07	2.13797e+07	1.95549e+07	1.71652e+07	2.06469e+07	2.28675e+07	1.90703e+07	2.50155e+07	2.08864e+07	2.03744e+07	2.05628e+07	2.0089e+07	1.97255e+07	2.27479e+07	2.18444e+07		2.7066e+07	2.95575e+07	2.73148e+07	2.91853e+07	3.59142e+07	2.53596e+07	2.70939e+07	4.03378e+07	3.04344e+07	2.21863e+07	28807924	2.5184e+07	2.91024e+07	3.24363e+07	2.75491e+07
4.03	8.05655e+06	9.08645e+06	8.08807e+06	7.50078e+06	7.68174e+06	9.16839e+06	8.81817e+06	9.79009e+06	8.45995e+06	8.79893e+06	8.86558e+06	8.79864e+06	8.61577e+06	1.03248e+07	9.72265e+06		2.34307e+07	2.45636e+07	1.78128e+07	2.07482e+07	2.36314e+07	1.67341e+07	2.0694e+07	2.11358e+07	2.28327e+07	1.62852e+07	1.9251e+07	1.77016e+07	1.82552e+07	1.78686e+07	2.09942e+07
4.01	9.15322e+06	1.09346e+07	8.17045e+06	7.71302e+06	9.82957e+06	1.09362e+07	1.10898e+07	1.25795e+07	8.04591e+06	1.10296e+07	8.47181e+06	1.05216e+07	9.95761e+06	1.28971e+07	9.4223e+06		2.70202e+07	2.80154e+07	2.23459e+07	2.2697e+07	2.57148e+07	2.27265e+07	2.46285e+07	2.92044e+07	2.80472e+07	2.10712e+07	2.33009e+07	2.00334e+07	2.63103e+07	2.5122e+07	2.35476e+07
3.99	2.22611e+07	1.99073e+07	2.61462e+07	2.54605e+07	2.28303e+07	2.29806e+07	2.32531e+07	2.73341e+07	2.56924e+07	2.00451e+07	2.20734e+07	2.50045e+07	2.52774e+07	2.51837e+07	2.90901e+07		4.56575e+07	4.78043e+07	4.49718e+07	4.39454e+07	5.02679e+07	4.50981e+07	4.56703e+07	5.42224e+07	5.7023e+07	4.09516e+07	4.8666e+07	4.10542e+07	4.25936e+07	4.8084e+07	4.42743e+07
3.97	2.2946e+07	2.08383e+07	2.59901e+07	2.67563e+07	2.17305e+07	2.46758e+07	2.39392e+07	2.86407e+07	3.00298e+07	2.00167e+07	2.3313e+07	2.44825e+07	3.25264e+07	2.75618e+07	3.2471e+07		4.14988e+07	4.47818e+07	4.13728e+07	4.52476e+07	5.51434e+07	41774358	4.69044e+07	5.44261e+07	5.53256e+07	3.80513e+07	4.24245e+07	4.03166e+07	3.62658e+07	4.40304e+07	4.20039e+07
3.95	1.77461e+07	1.64258e+07	1.97167e+07	1.68553e+07	1.49068e+07	1.96334e+07	1.96434e+07	2.3341e+07	2.50691e+07	1.48916e+07	1.95085e+07	1.89621e+07	2.78654e+07	2.45029e+07	2.51852e+07		3.6609e+07	4.11344e+07	3.57311e+07	4.00132e+07	5.04664e+07	3.51599e+07	4.14941e+07	4.93433e+07	4.78225e+07	3.26716e+07	3.83948e+07	3.44712e+07	3.27768e+07	3.92885e+07	3.64279e+07
3.93	1.51359e+07	1.30049e+07	1.36218e+07	1.20842e+07	1.31695e+07	1.7689e+07	1.76819e+07	2.08471e+07	1.66865e+07	1.5091e+07	1.42047e+07	1.79899e+07	2.07011e+07	2.23096e+07	1.79147e+07		3.34739e+07	3.62774e+07	3.31516e+07	3.43531e+07	4.55492e+07	3.34124e+07	3.76175e+07	5.03886e+07	4.60947e+07	2.97489e+07	3.73856e+07	3.10155e+07	3.07188e+07	3.68968e+07	3.20277e+07
3.91	8.85359e+06	8.66764e+06	7.59104e+06	6.61639e+06	7.72845e+06	9.69516e+06	9.68565e+06	1.00812e+07	7.58479e+06	9.24469e+06	8.05491e+06	1.00257e+07	8.73446e+06	1.21391e+07	8.65975e+06		3.25675e+07	3.24792e+07	29226966	2.90741e+07	3.90216e+07	2.497e+07	3.23086e+07	3.6479e+07	3.47154e+07	2.47715e+07	3.02673e+07	2.63012e+07	2.55763e+07	3.09942e+07	2.91748e+07
3.89	1.35512e+07	1.72922e+07	1.05757e+07	8.09379e+06	1.46387e+07	1.78333e+07	1.78645e+07	1.81224e+07	9.42667e+06	1.71439e+07	1.22347e+07	2.09001e+07	1.69882e+07	2.61175e+07	1.30904e+07		5.0259e+07	5.11906e+07	5.77914e+07	4.48318e+07	6.55958e+07	5.19708e+07	5.90035e+07	7.12334e+07	6.14743e+07	4.59877e+07	5.30384e+07	4.30318e+07	5.73299e+07	6.57791e+07	5.17517e+07
3.87	1.35628e+07	1.66458e+07	1.24443e+07	1.06541e+07	1.47751e+07	1.69202e+07	1.74249e+07	1.66552e+07	1.21206e+07	1.64496e+07	1.38297e+07	1.97332e+07	1.64271e+07	2.23558e+07	1.50161e+07		5.16604e+07	5.15456e+07	5.52583e+07	4.78786e+07	6.46285e+07	5.01818e+07	5.84905e+07	6.13903e+07	6.2476e+07	4.66791e+07	5.17789e+07	4.39759e+07	4.99908e+07	5.85913e+07	5.15021e+07
3.85	1.59507e+07	2.03613e+07	1.84497e+07	1.75731e+07	1.87478e+07	1.98932e+07	2.18426e+07	1.9809e+07	1.93993e+07	2.01918e+07	1.99394e+07	2.37742e+07	1.98692e+07	2.26486e+07	2.1818e+07		6.47139e+07	6.48136e+07	6.42846e+07	6.56602e+07	8.50445e+07	5.98725e+07	7.1317e+07	7.29129e+07	7.54498e+07	5.41486e+07	6.43754e+07	5.59607e+07	5.57048e+07	7.03876e+07	6.38213e+07
3.83	2.77329e+07	3.56574e+07	2.50705e+07	2.21235e+07	3.05474e+07	3.40075e+07	3.56708e+07	3.57993e+07	2.97959e+07	3.30159e+07	2.94475e+07	4.02234e+07	3.86101e+07	4.63007e+07	3.36426e+07		8.70877e+07	8.93725e+07	9.67887e+07	9.26438e+07	1.23421e+08	9.37532e+07	1.03461e+08	1.1438e+08	1.14115e+08	8.29057e+07	9.17328e+07	8.16378e+07	9.56518e+07	1.10104e+08	9.59501e+07
3.81	2.64518e+07	2.85587e+07	2.0143e+07	1.8168e+07	2.65045e+07	2.83694e+07	2.53446e+07	2.99349e+07	2.16378e+07	2.79399e+07	2.25961e+07	2.83125e+07	2.57508e+07	3.183e+07	2.54014e+07		5.50689e+07	5.10647e+07	5.22213e+07	5.88731e+07	7.10697e+07	5.3086e+07	5.8055e+07	6.82318e+07	6.63914e+07	4.90171e+07	5.13136e+07	5.05812e+07	5.84736e+07	6.12357e+07	5.75008e+07
3.79	1.76274e+07	1.9529e+07	1.63584e+07	1.60903e+07	1.831e+07	1.96762e+07	1.93887e+07	1.86189e+07	1.77082e+07	1.95366e+07	1.94797e+07	20246825	1.70653e+07	1.79611e+07	2.0138e+07		5.20714e+07	4.99755e+07	3.68064e+07	5.14313e+07	5.85327e+07	3.86858e+07	4.88641e+07	4.73349e+07	5.45471e+07	4.04331e+07	4.10801e+07	4.20901e+07	3.72502e+07	4.4454e+07	4.78449e+07
3.77	4.78137e+07	4.65259e+07	4.86605e+07	5.15635e+07	5.24759e+07	6.00525e+07	5.96637e+07	6.97426e+07	5.419e+07	4.89706e+07	4.90186e+07	5.79345e+07	6.18437e+07	7.01214e+07	5.9942e+07		1.00617e+08	9.50339e+07	1.08597e+08	1.07433e+08	1.49015e+08	1.1136e+08	1.10533e+08	1.54609e+08	1.2039e+08	8.31404e+07	1.04445e+08	8.71904e+07	9.58343e+07	1.26217e+08	1.01925e+08
3.75	3.74775e+07	3.49005e+07	3.35219e+07	34638691	3.81728e+07	4.7213e+07	4.80518e+07	5.76069e+07	3.67486e+07	3.87346e+07	3.38756e+07	4.34228e+07	4.45594e+07	5.81301e+07	4.28409e+07		7.96337e+07	7.40993e+07	8.71149e+07	8.75303e+07	1.27346e+08	8.6035e+07	9.31345e+07	1.33792e+08	1.0881e+08	7.01197e+07	8.40715e+07	7.35759e+07	8.34336e+07	1.01693e+08	8.48078e+07
3.73	2.07242e+07	1.91857e+07	1.47566e+07	1.54084e+07	1.95502e+07	2.55005e+07	2.34984e+07	2.80251e+07	1.62686e+07	2.08051e+07	1.62392e+07	2.57775e+07	2.129e+07	3.54149e+07	1.86893e+07		5.89033e+07	5.54341e+07	6.28719e+07	5.82957e+07	9.17755e+07	5.85304e+07	6.86487e+07	9.31024e+07	8.17906e+07	5.33038e+07	6.14855e+07	5.54776e+07	6.17725e+07	7.53028e+07	6.04298e+07
3.71	1.76183e+07	2.18659e+07	1.0158e+07	8.93104e+06	1.87298e+07	2.3368e+07	2.21514e+07	2.33663e+07	1.01191e+07	2.1017e+07	1.39662e+07	2.72064e+07	2.15493e+07	3.72035e+07	1.39748e+07		6.55813e+07	6.42434e+07	7.36128e+07	6.31898e+07	9.81806e+07	7.00943e+07	8.14704e+07	9.14424e+07	8.95932e+07	6.44396e+07	6.3918e+07	6.26285e+07	7.60148e+07	8.51733e+07	7.0097e+07
3.69	1.20901e+07	1.46936e+07	1.0458e+07	9.79046e+06	1.30701e+07	1.42963e+07	1.46887e+07	1.37661e+07	1.07043e+07	1.39524e+07	1.2659e+07	1.60669e+07	1.33707e+07	1.76085e+07	1.26634e+07		4.46572e+07	4.28212e+07	3.87154e+07	4.54284e+07	6.01704e+07	3.90395e+07	4.96242e+07	4.6781e+07	5.52325e+07	4.02857e+07	3.68072e+07	4.15106e+07	3.93832e+07	4.4852e+07	4.37811e+07
3.67	1.92447e+07	2.23896e+07	2.05647e+07	2.11364e+07	2.24026e+07	2.43062e+07	2.49905e+07	2.63806e+07	2.16662e+07	2.22642e+07	2.26466e+07	2.506e+07	2.15525e+07	2.90938e+07	2.4014e+07		5.36588e+07	5.32965e+07	4.95852e+07	5.56602e+07	7.45008e+07	4.99757e+07	5.94296e+07	6.40466e+07	6.70667e+07	4.96043e+07	4.77266e+07	4.85416e+07	4.70062e+07	5.87458e+07	5.34595e+07
3.65	3.72108e+07	3.38213e+07	1.88723e+07	2.08298e+07	3.32799e+07	3.82986e+07	3.2128e+07	4.27237e+07	2.57945e+07	3.11428e+07	3.14923e+07	3.02629e+07	3.09738e+07	4.51759e+07	3.2526e+07		5.9497e+07	5.83888e+07	5.21937e+07	6.55469e+07	9.2632e+07	5.21263e+07	6.82277e+07	8.91801e+07	7.63462e+07	4.95819e+07	4.65829e+07	5.61376e+07	5.93861e+07	6.95303e+07	5.98896e+07
3.63	3.99407e+07	3.37993e+07	1.62355e+07	1.90606e+07	3.3851e+07	3.83302e+07	3.13593e+07	4.2582e+07	2.60366e+07	3.03348e+07	3.24034e+07	2.90108e+07	3.03932e+07	4.34309e+07	3.34366e+07		5.4765e+07	5.38426e+07	4.90247e+07	6.27977e+07	8.60679e+07	5.19286e+07	6.40233e+07	8.66544e+07	7.20897e+07	4.74522e+07	4.38706e+07	5.38278e+07	6.02968e+07	6.82536e+07	5.70417e+07
3.61	1.83196e+07	1.97642e+07	1.93062e+07	1.93204e+07	2.03297e+07	2.23249e+07	2.23796e+07	2.27929e+07	1.93158e+07	1.91198e+07	2.03169e+07	2.23997e+07	1.88219e+07	2.24133e+07	2.13691e+07		4.83249e+07	4.65398e+07	4.82339e+07	5.16256e+07	6.67626e+07	4.94361e+07	5.31856e+07	6.27123e+07	6.21014e+07	4.36566e+07	4.6807e+07	4.32362e+07	4.31235e+07	5.82633e+07	4.92516e+07
3.59	4.48789e+07	5.01536e+07	5.19631e+07	4.54458e+07	5.0833e+07	5.3491e+07	5.20354e+07	3.90303e+07	3.98939e+07	3.95971e+07	4.38048e+07	4.68238e+07	3.88463e+07	3.24986e+07	5.00644e+07		7.2013e+07	6.78611e+07	7.47512e+07	7.78469e+07	8.21931e+07	7.32633e+07	7.58168e+07	6.56309e+07	8.38243e+07	6.48285e+07	6.94443e+07	6.91684e+07	5.57081e+07	7.1418e+07	7.19821e+07
3.57	2.31942e+07	1.95924e+07	1.38617e+07	1.52763e+07	2.11068e+07	2.44219e+07	2.13771e+07	2.62555e+07	1.7246e+07	1.88186e+07	2.01827e+07	2.01116e+07	1.9199e+07	2.60824e+07	2.32211e+07		3.76294e+07	3.64204e+07	3.28872e+07	4.40334e+07	6.55758e+07	3.31712e+07	4.42332e+07	5.69045e+07	5.04346e+07	3.14948e+07	3.35412e+07	3.69479e+07	3.78501e+07	4.49483e+07	3.68136e+07
3.55	5.7534e+07	3.80712e+07	3.33405e+07	36458104	4.38e+07	5.46865e+07	4.25023e+07	6.82932e+07	6.05101e+07	3.68682e+07	4.78878e+07	3.70475e+07	5.63519e+07	8.89464e+07	5.90339e+07		6.39102e+07	7.23341e+07	5.48147e+07	7.61747e+07	1.56028e+08	5.67877e+07	8.28814e+07	131837421	9.51836e+07	5.63236e+07	5.44077e+07	5.91277e+07	7.02311e+07	8.5117e+07	6.3436e+07
3.53	2.80101e+07	2.67959e+07	1.49912e+07	1.45697e+07	2.57162e+07	2.97021e+07	2.50497e+07	3.24079e+07	2.05962e+07	2.46836e+07	2.30317e+07	2.53967e+07	2.55186e+07	3.61707e+07	2.50969e+07		3.685e+07	3.62537e+07	4.42136e+07	4.20973e+07	6.29248e+07	4.3479e+07	4.54773e+07	7.03725e+07	5.19744e+07	3.71024e+07	4.39645e+07	3.73502e+07	5.56926e+07	5.86139e+07	4.33939e+07
3.51	3.05899e+07	3.36044e+07	2.69924e+07	2.26114e+07	3.35543e+07	3.54081e+07	2.88021e+07	3.94851e+07	2.8209e+07	3.18827e+07	2.8668e+07	3.10005e+07	3.0119e+07	3.75988e+07	2.99232e+07		3.42711e+07	3.29883e+07	4.50107e+07	4.36312e+07	6.21301e+07	4.20413e+07	4.25102e+07	7.24491e+07	4.94456e+07	3.6426e+07	4.49493e+07	3.93711e+07	5.45878e+07	5.76851e+07	4.16126e+07
3.49	9.17966e+06	1.1188e+07	5.18864e+06	4.49027e+06	9.91958e+06	1.20229e+07	1.24259e+07	1.22055e+07	5.20434e+06	1.16075e+07	6.95353e+06	1.47176e+07	1.08699e+07	1.78689e+07	7.19221e+06		2.78685e+07	2.69321e+07	3.95527e+07	2.70298e+07	4.19129e+07	3.66944e+07	3.541e+07	4.88617e+07	3.94419e+07	2.93117e+07	3.9457e+07	2.65947e+07	4.2913e+07	4.6198e+07	3.39932e+07
3.47	1.03798e+07	1.49669e+07	5.00263e+06	4.04483e+06	1.26155e+07	1.46667e+07	1.52828e+07	1.47084e+07	4.69908e+06	1.48705e+07	7.72776e+06	1.8933e+07	1.41483e+07	2.44001e+07	7.35403e+06		3.39787e+07	3.35906e+07	5.04054e+07	3.09977e+07	4.98082e+07	4.59325e+07	4.48797e+07	5.82708e+07	5.00184e+07	3.76426e+07	4.67916e+07	3.25008e+07	5.34198e+07	5.67828e+07	4.16247e+07
3.45	1.01943e+07	1.47443e+07	4.96765e+06	3.74769e+06	1.25228e+07	1.46359e+07	1.51832e+07	1.44837e+07	4.80825e+06	1.47538e+07	7.69978e+06	1.85991e+07	1.40308e+07	2.38245e+07	7.36744e+06		3.2415e+07	3.16346e+07	5.04413e+07	2.99191e+07	4.82259e+07	4.56376e+07	4.42238e+07	5.91207e+07	4.96065e+07	3.68702e+07	4.66842e+07	3.17183e+07	5.37583e+07	5.64386e+07	3.94407e+07
3.43	6.78914e+06	6.95119e+06	7.59936e+06	5.96387e+06	6.88574e+06	8.77112e+06	8.76094e+06	9.19163e+06	6.92588e+06	7.13031e+06	7.06324e+06	8.52355e+06	7.24227e+06	1.01568e+07	7.37869e+06		1.95027e+07	1.68345e+07	1.92829e+07	1.97986e+07	3.12507e+07	1.70717e+07	2.12284e+07	2.92207e+07	2.36624e+07	1.55099e+07	1.94095e+07	1.67475e+07	2.00654e+07	2.28763e+07	1.83579e+07
3.41	1.91759e+07	2.2402e+07	1.82883e+07	1.26887e+07	2.10676e+07	2.91834e+07	2.84708e+07	3.21465e+07	1.65612e+07	2.14646e+07	1.84261e+07	2.93496e+07	2.36013e+07	3.84369e+07	1.87017e+07		5.158e+07	4.84271e+07	6.25096e+07	5.28767e+07	8.74937e+07	5.7989e+07	6.21601e+07	8.92792e+07	6.72601e+07	4.86772e+07	5.30345e+07	4.52864e+07	6.81728e+07	7.83312e+07	5.53576e+07
3.39	1.30859e+07	1.56679e+07	9.027e+06	6.82577e+06	1.39374e+07	1.86935e+07	1.75722e+07	1.95094e+07	8.45775e+06	1.49055e+07	1.04774e+07	2.01614e+07	1.59486e+07	2.66958e+07	1.09144e+07		35496752	3.24982e+07	4.90228e+07	3.51568e+07	5.59616e+07	4.67132e+07	4.47242e+07	6.28445e+07	5.11394e+07	3.79111e+07	4.27428e+07	3.33178e+07	5.5879e+07	5.82965e+07	4.19302e+07
3.37	4.71965e+06	5.07395e+06	3.47594e+06	3.16036e+06	4.4741e+06	5.71277e+06	5.21166e+06	5.5603e+06	3.33577e+06	4.89285e+06	3.74338e+06	5.73489e+06	4.96349e+06	7.29718e+06	4.29175e+06		1.05684e+07	9.15834e+06	1.24305e+07	1.04535e+07	1.49748e+07	1.22097e+07	1.25958e+07	1.56265e+07	1.50035e+07	1.13306e+07	1.23396e+07	1.07734e+07	1.44374e+07	1.37864e+07	11619920
3.35	6.04561e+06	5.8752e+06	7.04018e+06	5.47529e+06	5.9617e+06	7.9702e+06	7.50931e+06	8.95911e+06	6.57453e+06	5.77106e+06	6.18718e+06	6.7741e+06	6.10844e+06	8.13425e+06	6.825e+06		1.25605e+07	1.11069e+07	1.05695e+07	1.24542e+07	1.82418e+07	9.99503e+06	1.16158e+07	1.78446e+07	1.3367e+07	9.61315e+06	1.15888e+07	9.68073e+06	1.22025e+07	1.37923e+07	1.14672e+07
3.33	1.68445e+07	1.49917e+07	1.91526e+07	1.39021e+07	1.6154e+07	2.37099e+07	2.21487e+07	2.72545e+07	1.78739e+07	1.51004e+07	1.65037e+07	1.95432e+07	17208297	2.4075e+07	1.8052e+07		2.84817e+07	2.50897e+07	2.54296e+07	3.10425e+07	4.74105e+07	2.46245e+07	2.74195e+07	4.87065e+07	3.33059e+07	2.28672e+07	2.36659e+07	2.20745e+07	3.15078e+07	3.63407e+07	2.60723e+07
3.31	1.05159e+07	9.36672e+06	1.18e+07	9.75778e+06	9.79609e+06	1.31215e+07	1.19784e+07	1.36315e+07	1.08579e+07	9.29687e+06	9.89844e+06	1.11782e+07	1.02181e+07	1.29458e+07	1.14864e+07		1.65971e+07	1.53541e+07	1.51578e+07	1.71098e+07	2.32985e+07	1.47763e+07	1.57947e+07	2.31152e+07	1.99529e+07	1.36167e+07	1.49464e+07	1.38846e+07	1.58259e+07	1.76068e+07	1.52385e+07
3.29	9.96252e+06	8.52238e+06	9.96805e+06	9.70343e+06	8.84031e+06	1.17746e+07	1.0748e+07	1.34487e+07	1.03283e+07	9.7229e+06	8.92206e+06	1.10176e+07	9.5981e+06	1.31773e+07	1.09715e+07		1.67407e+07	1.79151e+07	1.63695e+07	1.60876e+07	2.23086e+07	1.56598e+07	1.77618e+07	2.62749e+07	2.24036e+07	1.47228e+07	1.78699e+07	1.48046e+07	1.66438e+07	1.95064e+07	1.62683e+07
3.27	1.8383e+07	1.57773e+07	2.06485e+07	1.9295e+07	1.95453e+07	1.97954e+07	1.84771e+07	2.25775e+07	1.67584e+07	1.62352e+07	1.62034e+07	1.93096e+07	1.6506e+07	1.98008e+07	2.1099e+07		2.88962e+07	2.82485e+07	2.99385e+07	2.66966e+07	3.58571e+07	3.00553e+07	2.9851e+07	4.22775e+07	3.58699e+07	2.63798e+07	3.24887e+07	2.53005e+07	2.95404e+07	3.42485e+07	2.70588e+07
3.25	3.14988e+07	3.24555e+07	3.81791e+07	3.54618e+07	3.6741e+07	3.67377e+07	3.58188e+07	3.91284e+07	3.36669e+07	2.96425e+07	3.03027e+07	3.7415e+07	3.57461e+07	3.894e+07	3.68004e+07		4.30123e+07	4.24915e+07	5.22823e+07	3.98154e+07	4.7601e+07	5.81812e+07	4.48326e+07	6.56708e+07	5.01087e+07	3.78917e+07	5.45551e+07	3.73628e+07	5.17465e+07	5.95383e+07	4.33528e+07
3.23	5.73025e+07	6.41723e+07	6.38624e+07	6.27741e+07	6.2814e+07	7.46375e+07	7.27298e+07	7.23016e+07	7.06187e+07	5.61118e+07	5.66652e+07	7.33452e+07	7.53438e+07	7.90747e+07	6.37762e+07		6.98208e+07	7.57126e+07	9.27953e+07	6.07811e+07	7.11938e+07	1.10414e+08	7.31527e+07	1.07219e+08	7.75165e+07	6.79516e+07	9.04269e+07	6.03654e+07	8.47694e+07	1.00053e+08	7.02835e+07
3.21	1.8771e+08	2.14819e+08	2.259e+08	1.92344e+08	2.13931e+08	2.17261e+08	2.09442e+08	1.30212e+08	1.62684e+08	1.57713e+08	1.71708e+08	1.81763e+08	1.45826e+08	8.75077e+07	2.0243e+08		1.89058e+08	1.7973e+08	2.23253e+08	1.91564e+08	1.00782e+08	2.27817e+08	1.64998e+08	9.42606e+07	1.77247e+08	1.75791e+08	2.0683e+08	1.79131e+08	1.44179e+08	1.5893e+08	1.94553e+08
3.19	1.79545e+08	195130017	173311585	1.41662e+08	2.02067e+08	2.09181e+08	1.69587e+08	2.36854e+08	1.75719e+08	1.85825e+08	1.76627e+08	1.78018e+08	1.72112e+08	1.99191e+08	1.84319e+08		135309780	1.351e+08	2.05091e+08	1.8931e+08	248312180	1.97801e+08	1.72253e+08	3.47916e+08	1.99846e+08	1.51101e+08	2.19378e+08	172393551	2.62038e+08	2.72307e+08	1.69833e+08
3.17	2.04032e+07	1.34185e+07	2.06274e+07	1.98291e+07	2.13364e+07	1.92245e+07	2.13407e+07	2.39876e+07	1.81863e+07	1.99178e+07	1.63997e+07	2.09639e+07	1.696e+07	1.87825e+07	2.12513e+07		2.07759e+07	1.31263e+07	3.46226e+07	2.27646e+07	2.85304e+07	3.6516e+07	2.3975e+07	4.67114e+07	3.40279e+07	2.4085e+07	4.60303e+07	2.54576e+07	3.15017e+07	3.51839e+07	2.21351e+07
3.15	1.18666e+07	9.46009e+06	1.32831e+07	1.22462e+07	1.26003e+07	1.11079e+07	1.26392e+07	1.40017e+07	1.17511e+07	1.11945e+07	1.12368e+07	1.2203e+07	1.01968e+07	1.15675e+07	1.37054e+07		1.43421e+07	1.02734e+07	1.99309e+07	1.54967e+07	1.92517e+07	1.99525e+07	1.6036e+07	2.79625e+07	2.00613e+07	1.56002e+07	2.49579e+07	1.65545e+07	1.96203e+07	2.22973e+07	1.52453e+07
3.13	2.44211e+07	2.21925e+07	2.25593e+07	2.10164e+07	2.38505e+07	2.64586e+07	2.41289e+07	3.26547e+07	2.55015e+07	2.44855e+07	2.18841e+07	2.56456e+07	2.23724e+07	2.91741e+07	2.75846e+07		2.16054e+07	2.1151e+07	3.08024e+07	2.80583e+07	3.55579e+07	2.90556e+07	2.793e+07	5.49825e+07	3.54055e+07	2.5603e+07	3.24771e+07	2.62963e+07	3.61557e+07	4.15701e+07	2.77964e+07
3.11	1.41553e+07	1.14313e+07	1.39642e+07	1.34268e+07	1.36595e+07	1.54465e+07	1.40816e+07	1.84464e+07	1.48255e+07	1.26783e+07	1.29697e+07	1.43026e+07	1.31434e+07	1.62514e+07	1.54537e+07		1.52644e+07	1.36859e+07	2.03584e+07	1.7758e+07	2.22628e+07	1.88315e+07	1.79367e+07	3.02244e+07	2.36318e+07	1.70071e+07	2.11928e+07	1.80434e+07	1.87078e+07	22208831	1.84433e+07
3.09	8.97771e+06	8.35071e+06	9.39215e+06	8.70403e+06	8.9107e+06	1.01304e+07	9.0028e+06	1.10978e+07	9.98784e+06	8.355e+06	9.27285e+06	8.7328e+06	8.23928e+06	9.4979e+06	9.75075e+06		1.00548e+07	8.71838e+06	1.30798e+07	1.13168e+07	1.21877e+07	1.24613e+07	1.05563e+07	1.66613e+07	1.24113e+07	1.0013e+07	1.45481e+07	1.1377e+07	1.24509e+07	1.34492e+07	11722161
3.07	8.53896e+06	7.68378e+06	8.39827e+06	7.68818e+06	8.86527e+06	1.01774e+07	1.14762e+07	1.16367e+07	8.47484e+06	9.97126e+06	8.39587e+06	1.07848e+07	8.6078e+06	1.08979e+07	9.0848e+06		1.38776e+07	1.3116e+07	1.70808e+07	1.34423e+07	1.53869e+07	1.77056e+07	1.40617e+07	2.23737e+07	1.77429e+07	1.29246e+07	1.9911e+07	1.37108e+07	1.55998e+07	1.78335e+07	1.5576e+07
3.05	3.78021e+07	4.19108e+07	4.45661e+07	3.85177e+07	4.57867e+07	4.84108e+07	5.19001e+07	5.16189e+07	4.25845e+07	4.34004e+07	4.11853e+07	4.6632e+07	4.15964e+07	4.76087e+07	4.33761e+07		4.7285e+07	4.47604e+07	5.78831e+07	4.13222e+07	4.18673e+07	6.36883e+07	4.68686e+07	7.27701e+07	5.83673e+07	4.69458e+07	6.36501e+07	4.73104e+07	5.15868e+07	6.05793e+07	5.34338e+07
3.03	5.86317e+07	5.99897e+07	6.46514e+07	5.85271e+07	7.01106e+07	7.22804e+07	7.79687e+07	8.31817e+07	6.66571e+07	5.9827e+07	5.82248e+07	6.53079e+07	6.51357e+07	6.86912e+07	6.8648e+07		6.23333e+07	5.8544e+07	8.92762e+07	6.08572e+07	65422199	9.71299e+07	6.82293e+07	1.07032e+08	8.47048e+07	6.6415e+07	8.98488e+07	6.91874e+07	7.37692e+07	9.01851e+07	7.65852e+07
3.01	4.21197e+07	3.08035e+07	4.46004e+07	4.45038e+07	3.87551e+07	5.31015e+07	5.80915e+07	7.16167e+07	4.86086e+07	3.99938e+07	3.94166e+07	4.48562e+07	4.47635e+07	5.30843e+07	5.41779e+07		5.5214e+07	5.1962e+07	8.55527e+07	6.38474e+07	8.2353e+07	8.85345e+07	7.02487e+07	1.21078e+08	8.89665e+07	5.89454e+07	8.70792e+07	5.5067e+07	7.08357e+07	9.33348e+07	7.09152e+07
2.99	1.63524e+07	1.3605e+07	1.87225e+07	1.65171e+07	1.46103e+07	1.58586e+07	1.70192e+07	1.63301e+07	1.87603e+07	1.35742e+07	1.63481e+07	1.63682e+07	1.5318e+07	1.38647e+07	1.94701e+07		3.16391e+07	2.71566e+07	4.41647e+07	3.50258e+07	3.49165e+07	4.05319e+07	3.28991e+07	3.14905e+07	3.90624e+07	3.2282e+07	4.19789e+07	3.39242e+07	3.26624e+07	3.32709e+07	3.61593e+07
2.97	7.78825e+06	7.14109e+06	9.48301e+06	8.35552e+06	7.15282e+06	6.81817e+06	8.22403e+06	6.83797e+06	9.09329e+06	6.59946e+06	8.29996e+06	7.83089e+06	7.10321e+06	5.45203e+06	8.58312e+06		1.36692e+07	1.10654e+07	1.87986e+07	1.48643e+07	1.29281e+07	1.74553e+07	1.32577e+07	1.31376e+07	1.46106e+07	1.37814e+07	1.9135e+07	1.5507e+07	1.64057e+07	1.48297e+07	1.54544e+07
2.95	6.1323e+06	5.24706e+06	7.1815e+06	7.46888e+06	5.92539e+06	5.12892e+06	6.88445e+06	5.49259e+06	7.11554e+06	5.19156e+06	6.14259e+06	6.45659e+06	5.66585e+06	4.0513e+06	6.10556e+06		1.08085e+07	9.16688e+06	1.47294e+07	1.11188e+07	9.16714e+06	1.39401e+07	9.9512e+06	9.93644e+06	1.2974e+07	1.1095e+07	1.44849e+07	1.2229e+07	1.29436e+07	1.23085e+07	1.19072e+07
2.93	6.23182e+06	5.07875e+06	7.64124e+06	8.8204e+06	6.37164e+06	5.26788e+06	7.38717e+06	6.02664e+06	7.70845e+06	5.45003e+06	6.10431e+06	7.14212e+06	6.04529e+06	4.19152e+06	6.29101e+06		1.15599e+07	1.06315e+07	1.61892e+07	1.11168e+07	8.5994e+06	1.55891e+07	1.03036e+07	1.03641e+07	1.53578e+07	1.21211e+07	1.55652e+07	1.26778e+07	1.36916e+07	1.37695e+07	1.23965e+07
2.91	4.15778e+06	3.62998e+06	4.27191e+06	3.79673e+06	3.81987e+06	3.83305e+06	4.56796e+06	3.90416e+06	4.34326e+06	3.48849e+06	4.32929e+06	4.27135e+06	3.73959e+06	3.37131e+06	4.63358e+06		6.14695e+06	4.92873e+06	8.11561e+06	7.05555e+06	6.95693e+06	7.65702e+06	6.74885e+06	6.99377e+06	7.51728e+06	6.59802e+06	7.92646e+06	7.32068e+06	8.25746e+06	7.6157e+06	7.04521e+06
2.89	3.6947e+06	3.32682e+06	3.90121e+06	3.49053e+06	3.29298e+06	3.46126e+06	4.24022e+06	3.45622e+06	4.18488e+06	3.24953e+06	3.87272e+06	3.92839e+06	3.44427e+06	2.9434e+06	4.14311e+06		5.79644e+06	4.93893e+06	7.58127e+06	6.56045e+06	6.29568e+06	6.93513e+06	6.22023e+06	6.00137e+06	6.85523e+06	6.039e+06	7.23949e+06	6.77173e+06	7.30247e+06	6.90265e+06	6.61091e+06
2.87	5.46691e+06	4.26449e+06	6.21537e+06	7.53622e+06	5.46478e+06	4.98831e+06	7.38814e+06	5.75328e+06	6.61007e+06	5.46397e+06	4.96699e+06	6.9468e+06	5.43121e+06	4.09134e+06	5.11495e+06		1.00022e+07	1.0047e+07	1.53518e+07	9.71723e+06	7.13018e+06	1.49686e+07	9.3937e+06	8.72496e+06	1.42711e+07	1.07545e+07	1.47883e+07	1.09842e+07	1.19799e+07	1.23897e+07	1.1141e+07
2.85	4976334	3.96684e+06	5.19593e+06	5.73321e+06	4.68291e+06	4.76654e+06	6.69584e+06	5.48119e+06	5.51502e+06	5.14455e+06	4.55786e+06	6.28765e+06	4.7645e+06	4.20548e+06	4.81018e+06		8.23789e+06	7.78778e+06	1.32744e+07	8.25465e+06	6.86811e+06	1.27706e+07	8.26268e+06	8.19494e+06	1.14539e+07	8.87547e+06	1.34089e+07	9.1497e+06	1.04732e+07	1.06407e+07	9.35909e+06
2.83	3.83759e+06	3.07483e+06	3.72694e+06	3.95177e+06	3.41342e+06	3.58185e+06	4.17632e+06	3.65374e+06	3.90252e+06	3.15146e+06	3.56358e+06	3.92992e+06	3.41266e+06	2.93037e+06	3.79613e+06		6.09212e+06	5.24186e+06	8.21962e+06	6.35213e+06	5.76799e+06	7.53531e+06	5.98099e+06	6.36914e+06	7.37404e+06	6.44626e+06	7.69076e+06	6833031	7.1844e+06	6.87488e+06	6.88476e+06
2.81	4.69551e+06	3.04671e+06	3.47303e+06	3.27008e+06	3.37697e+06	4.26259e+06	4.18331e+06	4.07124e+06	3.71794e+06	3.31686e+06	3.6089e+06	3.82953e+06	3.291e+06	4.45416e+06	3.86354e+06		6.02091e+06	5.26109e+06	7.5248e+06	6.43491e+06	5.77628e+06	6.80024e+06	5.95549e+06	6.60206e+06	6.41925e+06	6.0694e+06	7.05078e+06	6.56861e+06	6.6992e+06	6.43183e+06	6.8571e+06
2.79	4.80221e+06	3.00122e+06	3.28067e+06	3.11337e+06	3.25887e+06	4.21164e+06	4.2149e+06	4.02251e+06	3.64245e+06	3.20319e+06	3.59941e+06	3.66903e+06	3.25108e+06	4.61579e+06	3.80762e+06		6.49302e+06	5.7256e+06	7.93954e+06	6.66733e+06	5.85633e+06	6.86213e+06	5.97957e+06	6.28959e+06	6.18771e+06	6.22875e+06	7.15911e+06	6.67847e+06	6.75864e+06	6.29302e+06	7.31003e+06
2.77	3.74238e+06	3.07652e+06	3.44509e+06	3.09526e+06	2.9681e+06	3.26297e+06	3.93981e+06	3.17973e+06	3.71799e+06	2.94368e+06	3.64066e+06	3.44218e+06	2.94253e+06	2.87055e+06	3.66038e+06		7.40145e+06	6.48704e+06	9.14012e+06	7.1585e+06	6.1037e+06	7.55844e+06	6.30461e+06	5.46867e+06	6.45469e+06	6.64898e+06	8.02776e+06	7.30386e+06	7.03211e+06	6.28804e+06	8.20071e+06
2.75	7.30248e+06	8.24512e+06	1.36414e+07	9.49484e+06	7.71834e+06	9.38026e+06	9.98792e+06	5.43997e+06	8.41988e+06	9604104	1.12851e+07	1.00245e+07	9172629	5.99073e+06	1.45002e+07		1.39135e+07	1.05084e+07	1.34479e+07	1.03643e+07	1.12179e+07	1.19704e+07	1.30923e+07	1.04748e+07	1.02309e+07	1.15476e+07	1.45765e+07	1.10816e+07	15626249	1.22802e+07	1.10716e+07
2.73	4.5611e+06	4.06594e+06	5.52902e+06	4.6182e+06	3.66251e+06	3.98968e+06	5.0129e+06	3.89124e+06	5.01163e+06	4.02765e+06	5.27048e+06	4.58563e+06	3.95929e+06	3.75534e+06	6.04216e+06		1.10383e+07	8.91309e+06	1.35249e+07	1.11639e+07	8.91253e+06	9.89014e+06	9.0506e+06	6.07422e+06	9.60342e+06	9.44981e+06	1.11267e+07	1.10572e+07	9.28057e+06	7.68517e+06	1.31796e+07
2.71	4.48556e+06	3.92628e+06	4.95466e+06	4.28691e+06	3.5038e+06	3.75783e+06	5.18056e+06	4.05965e+06	5.11851e+06	4.04423e+06	4.76271e+06	4.74453e+06	3.71166e+06	3.74377e+06	5.91624e+06		1.26658e+07	9.48668e+06	2.32968e+07	1.25523e+07	1.00371e+07	1.47073e+07	1.08781e+07	5.68652e+06	1.18028e+07	1.23516e+07	1.38216e+07	1.43365e+07	9.19688e+06	7.71143e+06	1.7191e+07
2.69	4.46516e+06	3.62802e+06	4.20244e+06	3.77294e+06	3.40372e+06	3.91794e+06	4.78783e+06	4.0617e+06	4.32435e+06	3.66781e+06	4.07798e+06	4.21926e+06	3.57064e+06	4.08621e+06	4.64064e+06		1.2437e+07	8.71559e+06	2.86665e+07	1.23767e+07	1.03919e+07	1.81959e+07	1.10565e+07	6.00094e+06	1.20896e+07	1.43011e+07	1.36116e+07	1.57466e+07	8.13302e+06	7.16024e+06	1.77387e+07
2.67	4.15888e+06	3.06583e+06	3.62741e+06	3.31109e+06	2.98807e+06	3.47285e+06	4.01605e+06	3.49565e+06	3.6937e+06	3.0326e+06	3.5282e+06	3.54175e+06	3.16169e+06	3.59296e+06	3.77986e+06		1.07449e+07	7.60679e+06	2.38112e+07	1.04365e+07	9.07995e+06	1.70128e+07	9.35967e+06	5.40129e+06	1.03465e+07	1.27102e+07	1.07186e+07	1.3728e+07	6.92046e+06	6.35974e+06	1.41197e+07
2.65	6.26541e+06	4.10209e+06	5.51196e+06	5.32406e+06	4.55234e+06	5.99671e+06	5.58521e+06	6.68337e+06	5.43012e+06	4.39811e+06	4.86668e+06	5.12708e+06	4.64798e+06	7.16976e+06	5.79822e+06		9.62302e+06	8.18588e+06	1.28466e+07	9.66239e+06	1.01767e+07	9.43392e+06	8.36257e+06	9.91815e+06	9.86737e+06	9.05124e+06	9.76694e+06	1.09183e+07	7.77721e+06	8.30389e+06	1.12861e+07
2.63	6.25114e+06	5.62434e+06	8.70969e+06	8.64086e+06	6.19442e+06	7.13596e+06	6.99788e+06	8.57024e+06	7.88264e+06	5.61928e+06	6.72588e+06	7.00734e+06	6.15724e+06	8.5405e+06	8.47371e+06		9.69535e+06	9.41678e+06	1.27107e+07	1.03397e+07	1.28664e+07	1.05076e+07	9.42961e+06	1.22053e+07	1.18934e+07	9.05561e+06	1.11309e+07	1.05513e+07	9.72551e+06	1.04424e+07	1.14285e+07
2.61	3.79221e+06	3.19872e+06	4.00693e+06	3.83335e+06	3.34965e+06	3.81173e+06	3.7754e+06	4.08678e+06	3.92294e+06	3.15468e+06	3.49653e+06	3.65759e+06	3.40208e+06	3.58472e+06	4.25297e+06		8.02474e+06	6.77626e+06	8.40038e+06	8.21666e+06	8.02605e+06	6.76098e+06	6.82445e+06	6.81647e+06	8.09186e+06	6.60423e+06	7.46296e+06	8.36512e+06	6.24834e+06	6.45252e+06	9.24488e+06
2.59	2.80754e+06	2.6287e+06	3.05365e+06	2.88866e+06	2.63825e+06	2.79366e+06	3.05132e+06	2.8973e+06	3.1429e+06	2.62456e+06	2.92341e+06	2.83569e+06	2719941	2.46904e+06	3.28454e+06		8.50952e+06	6.70829e+06	8.36519e+06	8.69467e+06	7.11945e+06	6.02965e+06	6.47846e+06	4.85244e+06	7.18102e+06	6.58862e+06	7.23047e+06	8.98333e+06	5.40254e+06	5.19187e+06	1.08265e+07
2.57	2.88364e+06	2.57943e+06	3.24534e+06	2.85624e+06	2.67155e+06	2.94063e+06	3.24937e+06	3.05256e+06	3.47188e+06	2.68322e+06	3.13982e+06	2.98581e+06	2.87318e+06	2.58547e+06	3.40425e+06		1.09521e+07	7.61278e+06	2.07911e+07	1.11709e+07	8.97431e+06	1.02477e+07	8.68087e+06	4.76992e+06	9.83371e+06	1.05922e+07	1.15965e+07	1.30347e+07	5.38403e+06	5.20439e+06	1.64261e+07
2.55	3.48089e+06	3.11896e+06	5.15975e+06	4.18927e+06	3.81239e+06	3.92895e+06	5.68886e+06	4.78243e+06	6.11422e+06	5.98068e+06	4.89555e+06	3.98552e+06	4.52858e+06	4.17044e+06	5.13152e+06		1.41208e+07	9.12309e+06	3.1963e+07	1.38438e+07	1.11779e+07	2.15268e+07	1.1858e+07	6.66594e+06	1.4104e+07	1.55518e+07	1.74505e+07	1.80223e+07	6.58272e+06	6.51859e+06	2.08725e+07
2.53	3.3043e+06	2.85215e+06	4.20075e+06	3.63124e+06	3.35658e+06	3.74823e+06	4.32839e+06	4.00901e+06	4.65422e+06	3.95892e+06	3.95035e+06	3.63271e+06	3.87189e+06	3.41408e+06	4.56541e+06		1.18274e+07	8.19937e+06	2.80743e+07	1.1207e+07	9.72108e+06	2.2472e+07	1.17335e+07	5.88246e+06	1.46293e+07	1.62682e+07	1.35254e+07	1.55138e+07	6.18691e+06	5.91149e+06	1.67861e+07
2.51	3.54158e+06	3.15377e+06	3.70779e+06	3.53988e+06	3.51042e+06	4.04895e+06	4.02586e+06	4.5503e+06	3.95504e+06	3.51115e+06	3.56736e+06	3.58412e+06	4.08954e+06	4.16631e+06	4.48142e+06		8.56087e+06	6.99621e+06	9.85602e+06	7.98328e+06	7.71349e+06	7.75356e+06	7.3193e+06	6.60638e+06	9.10547e+06	8.39675e+06	7.80006e+06	9.88517e+06	6.02214e+06	5.77789e+06	1.05766e+07
2.49	4.36844e+06	3.53642e+06	5.04516e+06	5.19753e+06	5.24203e+06	5.80862e+06	5.40282e+06	6.69702e+06	5.5996e+06	4.39975e+06	4.64685e+06	4.96876e+06	5.8954e+06	5.65174e+06	6.91841e+06		8.43835e+06	7.26952e+06	8.89534e+06	8.0058e+06	9.03797e+06	7.77929e+06	7.40108e+06	9.36326e+06	8.3317e+06	6.66909e+06	8549889	7.64397e+06	7.61033e+06	8.162e+06	8.67571e+06
2.47	7.10091e+06	4551114	1.12986e+07	1.28873e+07	9.74452e+06	1.04276e+07	1.13906e+07	1.49694e+07	1.15061e+07	7.8695e+06	8.68626e+06	8.95711e+06	1.36622e+07	1.0541e+07	1.48917e+07		1.46142e+07	1.21767e+07	1.8425e+07	1.49183e+07	1.83794e+07	1.77868e+07	1.33517e+07	1.86014e+07	1.4688e+07	1.1399e+07	1.70729e+07	1.10597e+07	1.22472e+07	1.57419e+07	1.44617e+07
2.45	1.18289e+07	6.83872e+06	2.04457e+07	2.3872e+07	1.64033e+07	1.72772e+07	2.02639e+07	2.72317e+07	1.96491e+07	1.32989e+07	1.42933e+07	1.47728e+07	2.49711e+07	1.82752e+07	2.59117e+07		2.59145e+07	2.04774e+07	3.51549e+07	2.73339e+07	3.42266e+07	3.46737e+07	2.35303e+07	3.44138e+07	2.59407e+07	2.0362e+07	3.26728e+07	1.88812e+07	2.05118e+07	2.82305e+07	2.56663e+07
2.43	1.39068e+07	9.14506e+06	2.48824e+07	2.78296e+07	1.90688e+07	1.94043e+07	2.3185e+07	2.98199e+07	2.22188e+07	1.54897e+07	1.69212e+07	1.73964e+07	2.85194e+07	2.04578e+07	2.98369e+07		3.80501e+07	3.06066e+07	5.26734e+07	3.9908e+07	4.23158e+07	5.07088e+07	3.4859e+07	3.70765e+07	3.82641e+07	3.29761e+07	4.79819e+07	3.21175e+07	2.89655e+07	3.52154e+07	4.1056e+07
2.41	7.8197e+06	6.17875e+06	1.01349e+07	1.07007e+07	8.55671e+06	9.28012e+06	1.03225e+07	1.26226e+07	9.44296e+06	8.10177e+06	7.87329e+06	8.26451e+06	1.14117e+07	9.76911e+06	1.19125e+07		1.74767e+07	1.47105e+07	2.22086e+07	1.7434e+07	1.77601e+07	2.09835e+07	1.57255e+07	1.69218e+07	1.76659e+07	1.61756e+07	2.22371e+07	1.65024e+07	1.4745e+07	1.52471e+07	1.87151e+07
2.39	1.43189e+07	1.17791e+07	9.7385e+06	9.55354e+06	1.40913e+07	1.31876e+07	1.29904e+07	2.01521e+07	9.47413e+06	1.34761e+07	7.91376e+06	1.16632e+07	1.58325e+07	2.29703e+07	1.04484e+07		1.81521e+07	1.49197e+07	4.61615e+07	2.35817e+07	3.16416e+07	3.47201e+07	2.25609e+07	4.58297e+07	2.87013e+07	2.12151e+07	3.94353e+07	1.82394e+07	2.53361e+07	2.8219e+07	2.39719e+07
2.37	9.43414e+06	8.32545e+06	8.29171e+06	7.42942e+06	9.16967e+06	1.14109e+07	1.11426e+07	1.22931e+07	8.80257e+06	9.79138e+06	7.90973e+06	9.76795e+06	9.74238e+06	1.09097e+07	9.46385e+06		1.54799e+07	1.55581e+07	1.63143e+07	1.55023e+07	1.91231e+07	1.52017e+07	1.59608e+07	2.27063e+07	1.80355e+07	1.3032e+07	1.79251e+07	1.37267e+07	1.76724e+07	1.86463e+07	1.57357e+07
2.35	3.28241e+07	2.60864e+07	2.46764e+07	2.26803e+07	3.29441e+07	4.35349e+07	4.18442e+07	4.82059e+07	3.01161e+07	3.35087e+07	2.44163e+07	35643161	3.65264e+07	4.33086e+07	3.26215e+07		4.34768e+07	4.35806e+07	4.70681e+07	4.84832e+07	8.11712e+07	4.2749e+07	5.25312e+07	9.87643e+07	6.43249e+07	3.89293e+07	5.03072e+07	3.85851e+07	5.38485e+07	7.06938e+07	4.50336e+07
2.33	3.88781e+07	3.27247e+07	3.45288e+07	3.16799e+07	4.18227e+07	5.0572e+07	5.46869e+07	5.54927e+07	3.81114e+07	3.99354e+07	3.39187e+07	4.67986e+07	4.67994e+07	4.75271e+07	4.53994e+07		5.63943e+07	5.89204e+07	6.72184e+07	6.15133e+07	9.66388e+07	6.43964e+07	70136680	1.14088e+08	8.70259e+07	5.71572e+07	6.89427e+07	5.63085e+07	8.24678e+07	9.29343e+07	6.06382e+07
2.31	1.30121e+07	1.13769e+07	1.40942e+07	1.17217e+07	1.29064e+07	1.57802e+07	1.57368e+07	1.45237e+07	1.27367e+07	1.30663e+07	1.28361e+07	1.44954e+07	1.40567e+07	1.27299e+07	1.65089e+07		1.93578e+07	1.67287e+07	2.12199e+07	1.9401e+07	2.51623e+07	2.10237e+07	2.08118e+07	2.8586e+07	2.42434e+07	1.86646e+07	2.40253e+07	1.83625e+07	2.63601e+07	2.51149e+07	1.8244e+07
2.29	1.07833e+07	1.00678e+07	1.00117e+07	9.26347e+06	1.09571e+07	1.27196e+07	1.25368e+07	1.32091e+07	9.63625e+06	1.07094e+07	9.53313e+06	1.08982e+07	1.02446e+07	1.17107e+07	1.06398e+07		1.63046e+07	1.50699e+07	1.82111e+07	1.63087e+07	1.91787e+07	1.7968e+07	1.75034e+07	2.25999e+07	2.01754e+07	1.60437e+07	1.91788e+07	1.53874e+07	2.10483e+07	2.03888e+07	1.58307e+07
2.27	1.40411e+07	1.30317e+07	1.15833e+07	1.15701e+07	1.46651e+07	1.68498e+07	1.66095e+07	1.87234e+07	1.16595e+07	1.37443e+07	1.12399e+07	1.39882e+07	1.34084e+07	1.695e+07	1.22553e+07		1.7601e+07	1.70618e+07	2.11582e+07	1.8284e+07	2.38268e+07	2.15803e+07	2.01649e+07	3.14211e+07	2.5107e+07	1.84578e+07	2.17179e+07	1.68026e+07	2.57699e+07	2.63742e+07	1.76711e+07
2.25	1.13258e+07	1.05747e+07	8.89036e+06	8.75907e+06	1.13987e+07	1.2957e+07	1.36808e+07	1.39305e+07	9.2677e+06	1.09786e+07	9.0161e+06	1.12211e+07	1.07323e+07	1.22933e+07	9.7853e+06		1.46128e+07	1.39732e+07	1.8746e+07	1.55001e+07	1.85367e+07	1.96146e+07	1.69083e+07	2.51408e+07	2.02259e+07	1.5767e+07	1.99135e+07	1.4196e+07	2.39619e+07	2.24073e+07	1.49428e+07
2.23	8.74279e+06	9.18313e+06	7.07785e+06	6.30819e+06	9.41276e+06	1.00429e+07	1.1629e+07	1.06946e+07	7.18144e+06	9.60195e+06	7.30104e+06	9.54106e+06	9.14673e+06	9.18762e+06	7.88556e+06		1.24624e+07	1.22961e+07	1.57238e+07	1.28699e+07	1.38967e+07	1.64154e+07	1.47006e+07	1.84914e+07	1.65938e+07	1.35257e+07	1.60782e+07	1.22164e+07	2.21169e+07	1.86251e+07	1.30471e+07
2.21	6.40662e+06	6.42773e+06	6132859	5.47917e+06	6.53065e+06	7.02395e+06	7.78759e+06	7.52573e+06	5.97088e+06	6.48847e+06	5.75896e+06	6.80202e+06	6.44117e+06	6.68946e+06	6.63269e+06		1.01256e+07	9.7565e+06	1.24195e+07	1.00933e+07	1.06206e+07	1.22242e+07	1.0916e+07	1.26571e+07	1.24169e+07	1.052e+07	1.23133e+07	9.97127e+06	1.48316e+07	1.26726e+07	1.04353e+07
2.19	5.4494e+06	4.8566e+06	5.99866e+06	5.61618e+06	5.07747e+06	5.88895e+06	5.87492e+06	6.15091e+06	5.98596e+06	4.78739e+06	5.36889e+06	5.65238e+06	5.18928e+06	5.64908e+06	6.63349e+06		9.27333e+06	8.7145e+06	1.01822e+07	9.10428e+06	9.89585e+06	1.01157e+07	8.93105e+06	1.00377e+07	1.01662e+07	8.19743e+06	1.08129e+07	8.73272e+06	1.06164e+07	9.99308e+06	9.58332e+06
2.17	5.90922e+06	4.89517e+06	7.55387e+06	6.90313e+06	5.80941e+06	6.65103e+06	6.70239e+06	7.08079e+06	7.5446e+06	5.23629e+06	6.52433e+06	6.26351e+06	6.44212e+06	6.1453e+06	8.4917e+06		1.30894e+07	1.13685e+07	1.23326e+07	1.25725e+07	1.324e+07	1.31783e+07	1.14058e+07	1.14419e+07	1.27549e+07	1.02182e+07	1.30887e+07	1.17207e+07	1.16855e+07	1.22192e+07	1.35376e+07
2.15	1.06799e+07	7.31741e+06	1.69472e+07	1.77971e+07	1.33278e+07	1.47211e+07	1.57867e+07	1.97073e+07	1.69199e+07	1.0922e+07	1.30981e+07	1.2922e+07	1.77112e+07	14492387	2.04021e+07		2.11409e+07	1.7609e+07	2.59202e+07	2.14204e+07	2.52414e+07	2.58257e+07	1.91359e+07	2.64422e+07	2.08142e+07	1.63399e+07	2.49772e+07	1.58295e+07	1.86688e+07	2.33845e+07	2.06297e+07
2.13	3.11763e+07	2.08169e+07	4.35813e+07	5.04524e+07	3.86299e+07	4.37146e+07	4.477e+07	6.10042e+07	4.36924e+07	3.23487e+07	3.23559e+07	3.67736e+07	5.11613e+07	4.81599e+07	5.4698e+07		4.24542e+07	3.85889e+07	6.08271e+07	4.78091e+07	7.15098e+07	6.09607e+07	4.52342e+07	8.15067e+07	5.47344e+07	3.78975e+07	5.63977e+07	3.39978e+07	4.38043e+07	6.09032e+07	4.29822e+07
2.11	2.56212e+07	1.6993e+07	2.07619e+07	2.39246e+07	2.58178e+07	3.19832e+07	2.94709e+07	3.73898e+07	2.48862e+07	24035359	1.88051e+07	2.52842e+07	3.0775e+07	3.154e+07	2.95787e+07		2.77128e+07	2.68813e+07	3.56752e+07	3.13149e+07	5.19454e+07	3.44712e+07	3.20436e+07	6.63769e+07	4.22429e+07	2.58661e+07	3.65877e+07	2.49486e+07	3.38998e+07	4.59366e+07	2.79514e+07
2.09	1.3551e+07	1.06018e+07	1.20014e+07	1.15042e+07	1.27008e+07	1.5427e+07	1.55655e+07	1.63532e+07	1.35222e+07	1.22986e+07	1.15087e+07	1.3708e+07	13744613	1.38536e+07	1.44107e+07		1.93526e+07	1.87495e+07	2.21678e+07	2.0263e+07	2.71255e+07	2.07746e+07	2.01964e+07	3.2364e+07	2.44583e+07	1.78089e+07	2.34387e+07	1.80478e+07	2.27494e+07	2.57018e+07	1.97396e+07
2.07	1.70213e+07	1.4046e+07	1.65723e+07	1.38691e+07	1.55638e+07	2.05485e+07	1.97014e+07	2.19898e+07	1.73563e+07	1.50222e+07	1.50271e+07	1.76244e+07	1.63472e+07	1.98026e+07	1.68246e+07		2.67602e+07	2.46466e+07	2.96391e+07	2.86239e+07	3.62251e+07	2.76744e+07	2.6192e+07	4.04545e+07	2.99826e+07	2.35031e+07	2.88044e+07	2.31015e+07	2.9634e+07	3.23e+07	2.69488e+07
2.05	3.16493e+07	2.6089e+07	2.27587e+07	2.07987e+07	3.18039e+07	3.92923e+07	3.92804e+07	4.1972e+07	2.63407e+07	3.304e+07	2.2713e+07	3.3574e+07	3.11687e+07	3.61708e+07	2.74164e+07		3.69101e+07	3.59414e+07	5.07263e+07	4.05213e+07	6.01943e+07	4.1208e+07	4.071e+07	8.20638e+07	4.95246e+07	3.45481e+07	6.39825e+07	3.31232e+07	4.97302e+07	6.01758e+07	3.68541e+07
2.03	2.16631e+07	1.76037e+07	1.78415e+07	1.62569e+07	1.97386e+07	2.48691e+07	2.49704e+07	2.6475e+07	1.96588e+07	2.00346e+07	1.74265e+07	2.13784e+07	2.09975e+07	2.33964e+07	2.02207e+07		3.02022e+07	2.86649e+07	3.70229e+07	3.16922e+07	4.23403e+07	3.39692e+07	3.1105e+07	5.02969e+07	3.66725e+07	2.80471e+07	3.88443e+07	2.72398e+07	3.71178e+07	3.98211e+07	3.03101e+07
2.01	1.98759e+07	1.83946e+07	2.10013e+07	1.67656e+07	1.88341e+07	2.44676e+07	2.56655e+07	2.72467e+07	2.03783e+07	1.83266e+07	1.95076e+07	2.16751e+07	1.97117e+07	2.41581e+07	2.01748e+07		3.14709e+07	2.86411e+07	3.68468e+07	3.31069e+07	4.18365e+07	3.53985e+07	3.11031e+07	4.6823e+07	3.55627e+07	2.88115e+07	3.57156e+07	2.72426e+07	4.00524e+07	3.98784e+07	3.05369e+07
1.99	2.00614e+07	1.90073e+07	2.05811e+07	1.67296e+07	2.00342e+07	2.58815e+07	2.63647e+07	2.92394e+07	2.00884e+07	1.92594e+07	1.92914e+07	2.24418e+07	2.02036e+07	2.64651e+07	2.0188e+07		2.97302e+07	2.72263e+07	3.39409e+07	3.15264e+07	4.22653e+07	3.30094e+07	3.0688e+07	4.95246e+07	3.69563e+07	2.79925e+07	3.18027e+07	2.58756e+07	4.05837e+07	4.11256e+07	2.82069e+07
1.97	1.64494e+07	1.47803e+07	1.573e+07	1.46663e+07	1.58891e+07	1.98728e+07	1.997e+07	2.18592e+07	1.56228e+07	1.53503e+07	1.51583e+07	1.75694e+07	1.59966e+07	2.08682e+07	1.64031e+07		2.36121e+07	2.19917e+07	2.6257e+07	2.40504e+07	3.07139e+07	2.55086e+07	2.4279e+07	3.64972e+07	3.05698e+07	2.28482e+07	2.49302e+07	2.12028e+07	3.04484e+07	3.07268e+07	2.23286e+07
1.95	1.45526e+07	1.25847e+07	1.40642e+07	1.44923e+07	1.26816e+07	1.6124e+07	1.51294e+07	1.56454e+07	1.3958e+07	1.28522e+07	1.40737e+07	1.46345e+07	1.36088e+07	1.56883e+07	1.44941e+07		2.0888e+07	1.8937e+07	2.02159e+07	1.95735e+07	2.11885e+07	2.03543e+07	1.94369e+07	2.55264e+07	2.48111e+07	1.91764e+07	2.00838e+07	1.78111e+07	2.08376e+07	2.15822e+07	1.93078e+07
1.93	2.32765e+07	2.18993e+07	2.48812e+07	2.54954e+07	2.28091e+07	2.85022e+07	2.7554e+07	2.98295e+07	2.74013e+07	2.126e+07	2.2911e+07	2.61578e+07	2.65231e+07	2.80168e+07	2.56719e+07		2.57007e+07	24535384	3.09127e+07	2.62927e+07	2.8336e+07	3.59696e+07	2.66776e+07	4.3032e+07	3.25322e+07	2.43153e+07	3.15779e+07	2.3483e+07	2.85066e+07	3.52649e+07	2.63703e+07
1.91	3.95869e+07	3.69831e+07	4.41515e+07	4.57813e+07	4.10614e+07	5.17814e+07	5.19747e+07	5.89714e+07	5.08266e+07	3.80429e+07	3.90233e+07	4.65679e+07	4.95942e+07	5.36473e+07	4.73898e+07		3.86588e+07	3.92944e+07	5.82742e+07	4.51594e+07	5.1803e+07	6.90414e+07	4.67954e+07	8.39473e+07	56242465	4.00405e+07	5.91001e+07	4.04097e+07	5.155e+07	6.76538e+07	4.63895e+07
1.89	2.26151e+07	1.77794e+07	2.19746e+07	2.29461e+07	2.09154e+07	2.77988e+07	2.82595e+07	3.42112e+07	2.5147e+07	2.00511e+07	2.00221e+07	2.35184e+07	2.45413e+07	2.75891e+07	2.59079e+07		2.49176e+07	2.38071e+07	3.56909e+07	2.87492e+07	3.58436e+07	4.02367e+07	3.00307e+07	5.3588e+07	3.82448e+07	2.56999e+07	3.60452e+07	2.48652e+07	3.21956e+07	4.07509e+07	2.91514e+07
1.87	9.85285e+06	8.08514e+06	9.61265e+06	9.54376e+06	8.9421e+06	1.10394e+07	1.17513e+07	1.29993e+07	1.05144e+07	8.84455e+06	9.1258e+06	9.89924e+06	9.8118e+06	1.0297e+07	1.09771e+07		1.45662e+07	1.32684e+07	1.77604e+07	1.57918e+07	1.75597e+07	1.82768e+07	1.54121e+07	22125937	1.85664e+07	1.39909e+07	1.80549e+07	1.41167e+07	1.68206e+07	1.8685e+07	1.55929e+07
1.85	8.18751e+06	7.87229e+06	7.50373e+06	7.13553e+06	8.0677e+06	9.12889e+06	9.49287e+06	9.75637e+06	7.74161e+06	8.3341e+06	7.65236e+06	8.36969e+06	7.87744e+06	8.7884e+06	8.22336e+06		1.23807e+07	1.14739e+07	1.3344e+07	1.24191e+07	1.34102e+07	1.33237e+07	1.2746e+07	1.72062e+07	1.49581e+07	1.16681e+07	1.33682e+07	1.16206e+07	1.54743e+07	1.56433e+07	1.22145e+07
1.83	9.64258e+06	9.96041e+06	8.27175e+06	7.94682e+06	1.01839e+07	1.14201e+07	1.14226e+07	1.18215e+07	8.4431e+06	1.06142e+07	8.90082e+06	10335412	9.67758e+06	1.09826e+07	9.19802e+06		1.31585e+07	1.247e+07	1.34706e+07	1.2776e+07	1.42875e+07	1.41001e+07	1.40317e+07	2.00448e+07	1.6513e+07	1.27233e+07	1.36961e+07	12121758	1.85616e+07	1.82402e+07	1.26061e+07
1.81	8.7873e+06	9.06871e+06	8.01197e+06	7.57262e+06	9.18292e+06	1.01994e+07	1.02497e+07	1.08315e+07	8.38509e+06	9.23602e+06	8.36788e+06	9.2809e+06	8.84878e+06	9.72031e+06	8.892e+06		1.73702e+07	1.60489e+07	1.37157e+07	1.99362e+07	1.869e+07	1.58415e+07	1.66061e+07	1.88252e+07	1.8449e+07	1.48958e+07	1.38644e+07	1.62125e+07	1.67737e+07	1.69188e+07	1.74651e+07
1.79	8.14257e+06	8.90881e+06	9.0127e+06	7.94729e+06	8.85723e+06	9.03132e+06	1.00537e+07	9.6815e+06	9.28995e+06	8.325e+06	8.78292e+06	8.83465e+06	8.42112e+06	8.28036e+06	9.29466e+06		1.88572e+07	1.70542e+07	1.61688e+07	2.14465e+07	1.89479e+07	1.83561e+07	1.676e+07	1.62766e+07	1.81251e+07	1.58677e+07	1.64622e+07	1.85086e+07	1.51012e+07	1.61962e+07	20078130
1.77	3.00887e+07	3.65578e+07	3.7465e+07	3.09361e+07	3.98844e+07	3.72914e+07	4.16527e+07	41533203	3.83491e+07	3.16037e+07	3.31053e+07	3.46866e+07	3.46796e+07	3.38873e+07	3.58624e+07		3.25634e+07	3.09791e+07	4.625e+07	3.05604e+07	2.68579e+07	4.96814e+07	3.25337e+07	4.40123e+07	3.50034e+07	3.34958e+07	4.64529e+07	3.72621e+07	3.80203e+07	4.32385e+07	3.93513e+07
1.75	2.53132e+07	2.43484e+07	26488701	2.5084e+07	2.78179e+07	2.95203e+07	3.04387e+07	3.26069e+07	2.83369e+07	2.33891e+07	2.41728e+07	2.67717e+07	2.66268e+07	2.9027e+07	2.78996e+07		3.05905e+07	2.8632e+07	3.96151e+07	2.99577e+07	3.1616e+07	4.19761e+07	3.10809e+07	4.33856e+07	3.82525e+07	3.0677e+07	3.85729e+07	3.27581e+07	3.26601e+07	3.82047e+07	3.53874e+07
1.73	3.25627e+07	2.55199e+07	3.3301e+07	3.46919e+07	3.0596e+07	4.14464e+07	4.05791e+07	5.08979e+07	3.78733e+07	2.91619e+07	2.98313e+07	3.55762e+07	3.50586e+07	4.40884e+07	3.77456e+07		3.46897e+07	3.47421e+07	5.07525e+07	3.86377e+07	5.24909e+07	5.57899e+07	4.2806e+07	8.10211e+07	5.6703e+07	3.63906e+07	5.15079e+07	3.45867e+07	4.34842e+07	5.96326e+07	4.08808e+07
1.71	3.19855e+07	2.38944e+07	3.0934e+07	3.33813e+07	2.94825e+07	3.92425e+07	3.74823e+07	4.74196e+07	3.58847e+07	2.70548e+07	2.78979e+07	3.36872e+07	3.38408e+07	4.21679e+07	3.58836e+07		3.26231e+07	32906568	4.87198e+07	3.71525e+07	5.10927e+07	5.32113e+07	4.07716e+07	7.46567e+07	5.57088e+07	3.50086e+07	4.81473e+07	3.37471e+07	4.0673e+07	55045354	3.79816e+07
1.69	2.03837e+07	1.45291e+07	1.93023e+07	2.06583e+07	1.81342e+07	2.30811e+07	2.12525e+07	2.66385e+07	2.21752e+07	1.6182e+07	1.75943e+07	2.07265e+07	1.92575e+07	2.55608e+07	2.15706e+07		2.36263e+07	2.34942e+07	3.31885e+07	2.56684e+07	3.46687e+07	3.34461e+07	2.72658e+07	4.52599e+07	3.71733e+07	2.47077e+07	3.27654e+07	2.50313e+07	2.71855e+07	3.45192e+07	2.55741e+07
1.67	1.44559e+07	1.16577e+07	1.445e+07	1.48124e+07	1.34719e+07	1.60593e+07	1.52102e+07	1.73612e+07	1.62112e+07	1.17135e+07	1.31799e+07	1.49953e+07	1.42325e+07	1.68381e+07	1.51377e+07		1.74338e+07	1.6869e+07	2.31378e+07	1.84371e+07	2.22261e+07	2.37777e+07	1.86364e+07	2.80507e+07	2.36641e+07	1.75449e+07	2.27907e+07	1.82752e+07	1.95585e+07	2.32453e+07	1.81555e+07
1.65	1.3667e+07	1.31716e+07	1.47463e+07	1.45087e+07	1.38689e+07	1.60768e+07	1.61065e+07	1.62856e+07	1.6803e+07	1.18966e+07	1.32703e+07	1.55357e+07	1.581e+07	1.55236e+07	1.48928e+07		1.45203e+07	1.3905e+07	1.95932e+07	1.54745e+07	1.59277e+07	2.26775e+07	1.50892e+07	2.35223e+07	1.68288e+07	1.41558e+07	1.96492e+07	1.50068e+07	1.82332e+07	2.08959e+07	1.52461e+07
1.63	1.13632e+07	1.06953e+07	1.19193e+07	1.17422e+07	1.13515e+07	1.31825e+07	1.31941e+07	1.32243e+07	1.36855e+07	9.75572e+06	1.09503e+07	1.26475e+07	1.29043e+07	1.23593e+07	1.22513e+07		1.21237e+07	1.1599e+07	1.63608e+07	1.30353e+07	1.3089e+07	1.87112e+07	1.25442e+07	1.92245e+07	1.36184e+07	1.2068e+07	1.61473e+07	1.26686e+07	1.53728e+07	1.70747e+07	1.30243e+07
1.61	6.6928e+06	5.79936e+06	6.78302e+06	6.39675e+06	6.18264e+06	6.87961e+06	7.23102e+06	6.48756e+06	7.62104e+06	5.37854e+06	6.51519e+06	6.77342e+06	6.4434e+06	5.8163e+06	6.99184e+06		9.74449e+06	8.96632e+06	1.22372e+07	1.0274e+07	9.82361e+06	1.24314e+07	9.31138e+06	1.13172e+07	9.93667e+06	9.63721e+06	1.18639e+07	9.79365e+06	1.11909e+07	1.11297e+07	1.04934e+07
1.59	5.61443e+06	4.69229e+06	5.34334e+06	4.88613e+06	4.73263e+06	5.23462e+06	6.14155e+06	4.69292e+06	6.00373e+06	4.36998e+06	5.42489e+06	5.28651e+06	4.6843e+06	4.09352e+06	5.59641e+06		9.12966e+06	8.43576e+06	1.20623e+07	9.62949e+06	8.8099e+06	1.16241e+07	8.65944e+06	9.49731e+06	8.86543e+06	9.03063e+06	1.17626e+07	8.99738e+06	1.11355e+07	1.01021e+07	9.7342e+06
1.57	5.1546e+06	4.35003e+06	4.75338e+06	4.37697e+06	4.29802e+06	4.64596e+06	5.60623e+06	4.14751e+06	5.11514e+06	4.03839e+06	4.85583e+06	4.73992e+06	4.12965e+06	3.6348e+06	5.03761e+06		8.32366e+06	7.64697e+06	1.04111e+07	8.44701e+06	7.71286e+06	1.00913e+07	7.81851e+06	8.37062e+06	7.8996e+06	7.84028e+06	1.02244e+07	8.16058e+06	1.01905e+07	9.06544e+06	8.42506e+06
1.55	4.73853e+06	4.10616e+06	4.70151e+06	4.24472e+06	4.11174e+06	4.47029e+06	5.26126e+06	4.31798e+06	4.93176e+06	3.95945e+06	4.64145e+06	4.58286e+06	3.96683e+06	3.74953e+06	4.94067e+06		7.99664e+06	7.42086e+06	9.1413e+06	7.91022e+06	7.74201e+06	8.75839e+06	7.42376e+06	8.29065e+06	7.72225e+06	7.26708e+06	8.83732e+06	7.68746e+06	8.97187e+06	8.45338e+06	8.23044e+06
1.53	6.44272e+06	5.28296e+06	6.44901e+06	6.00916e+06	5.56253e+06	6.92566e+06	7.71559e+06	7.88819e+06	6.95587e+06	5.63658e+06	6.1866e+06	6.37589e+06	5.92513e+06	6.28402e+06	7234477		9.83816e+06	9.35836e+06	1.20588e+07	1.00068e+07	1.12821e+07	1.19448e+07	1.01785e+07	1.40126e+07	1.14684e+07	9.1831e+06	1.1667e+07	9.25963e+06	1.14374e+07	1.2358e+07	1.07e+07
1.51	1.00261e+07	7.68472e+06	9.94151e+06	9.73084e+06	8.76501e+06	1.18738e+07	1.28075e+07	1.52754e+07	1.08228e+07	9.05024e+06	9.25163e+06	1.00227e+07	9.84112e+06	1.15953e+07	1.1708e+07		1.3256e+07	1.28066e+07	1.87187e+07	1.43566e+07	1.8556e+07	1.91108e+07	1.58407e+07	2.65211e+07	1.91097e+07	1.33859e+07	1.81639e+07	1.23594e+07	1.6691e+07	2.04197e+07	1.53302e+07
1.49	1.05595e+07	8.01533e+06	1.03548e+07	1.02284e+07	9.15079e+06	1.23296e+07	1.28453e+07	1.53352e+07	1.12709e+07	9.2241e+06	9.52927e+06	1.02276e+07	1.00917e+07	1.23011e+07	1.19506e+07		1.33583e+07	1.31091e+07	1.88498e+07	1.44532e+07	1.87508e+07	1.89828e+07	1.57269e+07	2.64232e+07	1.94144e+07	1.37329e+07	1.83885e+07	1.27677e+07	1.67509e+07	1.99826e+07	1.55278e+07
1.47	3.18962e+07	1.10409e+07	1.40465e+07	1.38166e+07	1.91086e+07	2.80426e+07	1.70135e+07	3.84851e+07	1.73209e+07	1.64033e+07	1.23106e+07	1.59994e+07	1.54179e+07	3.62987e+07	1.50306e+07		1.7984e+07	1.93825e+07	2.69814e+07	2.07549e+07	3.51008e+07	2.47957e+07	2.35536e+07	7.77116e+07	2.50294e+07	1.88411e+07	2.43098e+07	1.72354e+07	2.29893e+07	3.33513e+07	2.1654e+07
1.45	1.91733e+07	1.14291e+07	1.3988e+07	1.38555e+07	1.50421e+07	2.14985e+07	1.78755e+07	2.58692e+07	1.64946e+07	1.45567e+07	1.26802e+07	1.50691e+07	1.48597e+07	2.11754e+07	1.60741e+07		1.85226e+07	1.86269e+07	2.596e+07	2.08919e+07	3.20325e+07	2.58095e+07	2.30441e+07	4.58665e+07	2.75723e+07	1.93018e+07	2.51844e+07	1.75695e+07	2.37625e+07	3.04519e+07	2.16299e+07
1.43	1.36438e+07	9.49319e+06	1.21519e+07	1.18117e+07	1.10735e+07	1.5688e+07	1.48439e+07	1.79765e+07	1.41717e+07	1.10158e+07	1.1331e+07	1.23181e+07	1.19693e+07	1.39028e+07	1.42159e+07		1.636e+07	1.59957e+07	2.253e+07	1.81122e+07	2.46306e+07	2.24134e+07	1.89724e+07	3.08788e+07	2.27476e+07	1.72434e+07	2.22828e+07	1.56422e+07	2.02529e+07	2.37879e+07	1.96142e+07
1.41	1.01379e+07	7.7395e+06	9.4207e+06	8.35779e+06	7.82061e+06	1.06655e+07	9.77792e+06	1.01505e+07	1.06695e+07	7.68436e+06	9.09657e+06	8.57338e+06	8.12024e+06	8.09422e+06	9.8889e+06		1.3486e+07	1.28545e+07	1.78211e+07	1.39789e+07	1.57021e+07	1.69592e+07	1.38697e+07	1.70335e+07	1.49319e+07	1.4543e+07	1.75194e+07	1.31685e+07	1.61044e+07	1.56896e+07	1.62507e+07
1.39	8.78176e+06	7.0472e+06	8.34082e+06	7.08526e+06	6.40754e+06	8.8315e+06	7.70547e+06	6.57101e+06	9.266e+06	6.45305e+06	8.02613e+06	6.88242e+06	6.31079e+06	5.51442e+06	7.82022e+06		1.28071e+07	1.22416e+07	1.65591e+07	1.30124e+07	1.29237e+07	1.51745e+07	1.22714e+07	1.15247e+07	1.18772e+07	1.4326e+07	1.59094e+07	1.26806e+07	1.44607e+07	1.24798e+07	1.60504e+07
1.37	8.45036e+06	6.40303e+06	7.47999e+06	6.24008e+06	5.81559e+06	8.62892e+06	7.298e+06	5.81041e+06	8.69173e+06	5.94903e+06	7.21913e+06	6.45888e+06	5.66147e+06	5.03805e+06	7.06185e+06		1.16904e+07	1.12992e+07	1.62847e+07	1.22156e+07	1.20108e+07	1.48345e+07	1.12584e+07	1.13168e+07	1.05784e+07	1.43238e+07	1.59834e+07	1.17598e+07	1.42049e+07	1.20233e+07	1.62293e+07
1.35	9.10372e+06	6.39261e+06	7.28412e+06	6.20021e+06	5.78103e+06	9.38065e+06	8.12512e+06	5.99077e+06	9.20703e+06	5.93853e+06	7.4129e+06	7.02745e+06	5.79275e+06	5.48379e+06	7.48071e+06		1.18972e+07	1.18355e+07	1.79662e+07	1.288e+07	1.30332e+07	1.6352e+07	1.16302e+07	1.28507e+07	1.0848e+07	15623742	1.83609e+07	1.18735e+07	1.6021e+07	1.33231e+07	1.77349e+07
1.33	2.72487e+07	2.07263e+07	2.55536e+07	2.18021e+07	2.39508e+07	3.40917e+07	3.04825e+07	3.67875e+07	2.47527e+07	2.43439e+07	2.4547e+07	2.81666e+07	2.41398e+07	3.61895e+07	2.94154e+07		2.88376e+07	2.91449e+07	4.16764e+07	3.2633e+07	4.88024e+07	3.97435e+07	3.57061e+07	6.50758e+07	3.90503e+07	3.44732e+07	4.65998e+07	2.71576e+07	4.61725e+07	4.85996e+07	3.708e+07
1.31	3.29597e+07	2.34934e+07	2.69875e+07	2.39332e+07	2.68521e+07	3.81299e+07	3.47877e+07	3.9138e+07	2.67124e+07	2.735e+07	2.67742e+07	3.10789e+07	2.66838e+07	3.8977e+07	3.22201e+07		3.13581e+07	3.07391e+07	4.99776e+07	3.62856e+07	5.09011e+07	4.89556e+07	3.92367e+07	7.06801e+07	4.33676e+07	3.93667e+07	5.58158e+07	3.06864e+07	5.54163e+07	5.36954e+07	3.94637e+07
1.29	1.83244e+07	1.41649e+07	1.6433e+07	1.20041e+07	1.14208e+07	1.60807e+07	1.8794e+07	9.35349e+06	1.60398e+07	1.21015e+07	1.5268e+07	1.44703e+07	1.10525e+07	8.57085e+06	1.41849e+07		2.34612e+07	2.30457e+07	4.72918e+07	2.52136e+07	2.03948e+07	4.02467e+07	2.32246e+07	2.8107e+07	1.89259e+07	2.73858e+07	5.14841e+07	2.08739e+07	4.21608e+07	3.20813e+07	2.9664e+07
1.27	1.81941e+07	1.5697e+07	1.67041e+07	1.48229e+07	1.1908e+07	1.49113e+07	2.04582e+07	1.07132e+07	1.7608e+07	1.31401e+07	1.89599e+07	1.61542e+07	1.21791e+07	1.06669e+07	1.75395e+07		2.49343e+07	2.56558e+07	4.35811e+07	2.4484e+07	2.01341e+07	3.61203e+07	2.4264e+07	2.60899e+07	2.12021e+07	2.64693e+07	4.26958e+07	2.19701e+07	4.15539e+07	3.09633e+07	2.72196e+07
1.25	1.69427e+07	1.65579e+07	1.77739e+07	1.54788e+07	1.14177e+07	1.28488e+07	1.72986e+07	1.08538e+07	1.68957e+07	1.21024e+07	2.0155e+07	1.53169e+07	1.18061e+07	1.14814e+07	1.94292e+07		2.18478e+07	2.25482e+07	3.22849e+07	2.02874e+07	1.86616e+07	2.71324e+07	2.18583e+07	2.26852e+07	2.14069e+07	2.3351e+07	3.02871e+07	2.05409e+07	3.58689e+07	2.70087e+07	2.28792e+07
1.23	1.49894e+07	1.45434e+07	1.42497e+07	1.34031e+07	9.5101e+06	1.01549e+07	1.52625e+07	8.35006e+06	1.30742e+07	1.04174e+07	1.64895e+07	1.37741e+07	1.08767e+07	9.11096e+06	1.65027e+07		1.7656e+07	1.82908e+07	2.80154e+07	1.56245e+07	1.4273e+07	2.24826e+07	1.72871e+07	1.64323e+07	1.84792e+07	1.97682e+07	2.51464e+07	1.70835e+07	3.34459e+07	2.29161e+07	1.80161e+07
1.21	1.10465e+07	9.84465e+06	1.04695e+07	9665438	7.57558e+06	7.96712e+06	1.30124e+07	6.57574e+06	1.01908e+07	8.32144e+06	1.14586e+07	1.10096e+07	8.39309e+06	6.66908e+06	1.14641e+07		1.47705e+07	1.48773e+07	2.26699e+07	1.32303e+07	1.12372e+07	1.92871e+07	1.36312e+07	1.2868e+07	1.48215e+07	1.60946e+07	1.97593e+07	1.47024e+07	2.5806e+07	1.94245e+07	1.46016e+07
1.19	8.02071e+06	7.25861e+06	8.10292e+06	7.23666e+06	6.54555e+06	6.78418e+06	9.88552e+06	5.71186e+06	7.95279e+06	6.82115e+06	8.84342e+06	8.57133e+06	6.68484e+06	5.71062e+06	9.03185e+06		1.2109e+07	1.16048e+07	1.56916e+07	1.1205e+07	9.8872e+06	1.41178e+07	1.10211e+07	1.12655e+07	1.16244e+07	1.20332e+07	1.41581e+07	1.18556e+07	1.83255e+07	1.49919e+07	1.14816e+07
1.17	6.09161e+06	5.60722e+06	6.00047e+06	5.3664e+06	5.15696e+06	5.47186e+06	7.35624e+06	4959031	6.0878e+06	5.31804e+06	6.57886e+06	6.35653e+06	5.286e+06	4.89357e+06	6.80733e+06		9.82137e+06	9.16787e+06	1.16675e+07	9.13433e+06	8.51099e+06	1.03133e+07	8.68132e+06	9.35166e+06	9.21517e+06	9.19117e+06	1.0465e+07	9.49002e+06	1.30139e+07	1.12532e+07	9.10374e+06
1.15	5.07076e+06	4.78966e+06	4.73761e+06	4.18163e+06	4.26987e+06	4.79439e+06	5.96049e+06	4.39209e+06	4.90721e+06	4.42211e+06	5.23376e+06	5.14243e+06	4.42998e+06	4.35973e+06	5.51393e+06		7.39974e+06	7.04422e+06	9.04973e+06	6.97125e+06	6.93934e+06	8.04067e+06	6.64354e+06	8.20638e+06	7.05832e+06	6.9801e+06	8.11979e+06	7.30637e+06	1.06136e+07	9.33687e+06	6.96325e+06
1.13	4.72173e+06	4.60472e+06	4.33041e+06	3.77875e+06	4.11566e+06	4.76342e+06	5.654e+06	4.51622e+06	4.54907e+06	4.3035e+06	4.73203e+06	4.86771e+06	4.20406e+06	4.46065e+06	5.20952e+06		6.36877e+06	6.16241e+06	7.74467e+06	6.18488e+06	6.79462e+06	7.05953e+06	6.03115e+06	8.44726e+06	6.27309e+06	5.99115e+06	6.98925e+06	6.25992e+06	9.86659e+06	9.0033e+06	6.07275e+06
1.11	4.79404e+06	4.60474e+06	4.3967e+06	3.77609e+06	4.11986e+06	4.96511e+06	5.73753e+06	4.81851e+06	4630063	4.37278e+06	4.66189e+06	4.80657e+06	4.33165e+06	4.70847e+06	5.47228e+06		6.20948e+06	6.0176e+06	7.47301e+06	5.88544e+06	7.06732e+06	6.71841e+06	5.93395e+06	8.68167e+06	5.94623e+06	5.67845e+06	6.70637e+06	5.67343e+06	9.87088e+06	9.04378e+06	5.74251e+06
1.09	4.96234e+06	4.7934e+06	4.40113e+06	3.74926e+06	4.22739e+06	5.13936e+06	5.86408e+06	5.03901e+06	4.81982e+06	4.58401e+06	4.75955e+06	4.9475e+06	4.48996e+06	4.94303e+06	5.75338e+06		6.19536e+06	6.17379e+06	7.52444e+06	5.91049e+06	7.27824e+06	6.64751e+06	6.13764e+06	8.9837e+06	6.09803e+06	5777617	6.68548e+06	5.60393e+06	1.01281e+07	9.29186e+06	5.81628e+06
1.07	5.28236e+06	5.09035e+06	4.37802e+06	3.87454e+06	4.54275e+06	5.47868e+06	6.01942e+06	5.35539e+06	4.81438e+06	4.81679e+06	4.88996e+06	5.09551e+06	4.63808e+06	5.21808e+06	5.76521e+06		6.043e+06	6.16659e+06	7.62937e+06	5.71501e+06	7.1534e+06	6.84824e+06	5.95745e+06	9.71422e+06	6.43417e+06	5.60431e+06	7.12938e+06	5.58371e+06	1.00269e+07	9.40541e+06	5.92273e+06
1.05	1.15713e+07	1.02831e+07	1.22866e+07	1.12103e+07	1.12382e+07	1.44355e+07	1.46211e+07	1.63101e+07	1.24235e+07	1.09738e+07	1.15345e+07	1.26282e+07	1.06795e+07	15506078	1.28836e+07		1.53284e+07	1.45813e+07	1.90883e+07	1.55405e+07	2.2738e+07	2.00464e+07	1.58831e+07	3.08147e+07	2.03322e+07	1.35997e+07	20858258	1.41309e+07	2.09789e+07	2.48909e+07	1.64152e+07
1.03	3.47127e+07	26179154	3.142e+07	3.55729e+07	3.54357e+07	4.26393e+07	3.91416e+07	4.93583e+07	3.02159e+07	2.93955e+07	2.8859e+07	3.33155e+07	3.18899e+07	5.00435e+07	3.33848e+07		3.19685e+07	3.29973e+07	4.20232e+07	3.31365e+07	5.71048e+07	4.28003e+07	3.68575e+07	7.62852e+07	5.47659e+07	3.18639e+07	4.00954e+07	3.05426e+07	4.18365e+07	5.39396e+07	3.13285e+07
1.01	1.67462e+07	1.23704e+07	1.55215e+07	1.69505e+07	1.54682e+07	2.02873e+07	1.75978e+07	2.3337e+07	1.68202e+07	1.38541e+07	1.43355e+07	1.68064e+07	1.47111e+07	2.43788e+07	1.74101e+07		1.83013e+07	1.92417e+07	2.34477e+07	1.87877e+07	3.022e+07	2.21097e+07	2.081e+07	4.04668e+07	3.03268e+07	1.84572e+07	2.35404e+07	1.7857e+07	2.26933e+07	2.80878e+07	1.86807e+07
0.99	3.18847e+07	2.44378e+07	3.10063e+07	3.39254e+07	3.22398e+07	4.01847e+07	3.66046e+07	4.74309e+07	3.0929e+07	2.79003e+07	2.80042e+07	3.20911e+07	2.95574e+07	4.80118e+07	3.2144e+07		3.24196e+07	3.37966e+07	4.3201e+07	3.33302e+07	5.72697e+07	4.15496e+07	3.72864e+07	7.92137e+07	5.48384e+07	3.20782e+07	4.24208e+07	3.04781e+07	4.18945e+07	5.44535e+07	3.2393e+07
0.97	3.83174e+07	2.71703e+07	3.54397e+07	3.94802e+07	3.64731e+07	4.69536e+07	4.13561e+07	5.49011e+07	3.68966e+07	3.17692e+07	3.19947e+07	3.80655e+07	3.48225e+07	5.60116e+07	3.80283e+07		3.81878e+07	4.04305e+07	5.2662e+07	3.9527e+07	6.69759e+07	5.16242e+07	4.55638e+07	9.09319e+07	6.75674e+07	3.95585e+07	5.1132e+07	38113345	4.69786e+07	6.2786e+07	3.86285e+07
0.95	6.3067e+07	3.87683e+07	5.56611e+07	6.43742e+07	5.36845e+07	7.55815e+07	61025266	9.03942e+07	6.41469e+07	4.78239e+07	4.95973e+07	6.30785e+07	5.52544e+07	9.66787e+07	6.36035e+07		6.4807e+07	7.03067e+07	9.16909e+07	6.80584e+07	1.18005e+08	8.86413e+07	8.10019e+07	1.60087e+08	1.26955e+08	7.0487e+07	8.76361e+07	7.02035e+07	7.2642e+07	1.05293e+08	6.74147e+07
0.93	2.79375e+07	2.06628e+07	2.73854e+07	2.83869e+07	2.4728e+07	3.0443e+07	2.75299e+07	3.38131e+07	2.92099e+07	2.18568e+07	2.54061e+07	2.70341e+07	2.38892e+07	3.4587e+07	2.96644e+07		39208473	3.77725e+07	4.57134e+07	3.90684e+07	5.21641e+07	4.33666e+07	4.08325e+07	5.95363e+07	5.3603e+07	3.77246e+07	4.40537e+07	3.71175e+07	4.01526e+07	4.47206e+07	3.76581e+07
0.91	1.46989e+07	1.22227e+07	1.47521e+07	1.37495e+07	1.27301e+07	1.45635e+07	1.47177e+07	1.39391e+07	1.55322e+07	1.14551e+07	1.47089e+07	1.39963e+07	1.23547e+07	1.33497e+07	1.53846e+07		2.3458e+07	2.21143e+07	2.8357e+07	2.25494e+07	2.39909e+07	2.60189e+07	2.2075e+07	2.60068e+07	2.54146e+07	2.23941e+07	2.79284e+07	2.18171e+07	2.48004e+07	2.38373e+07	2.2334e+07
0.89	1.26867e+07	1.10774e+07	1.33852e+07	1.14213e+07	1.07871e+07	1.15562e+07	1.41147e+07	1.00241e+07	1.36226e+07	1.02782e+07	1.36213e+07	1.27367e+07	10405954	8.81683e+06	1.33438e+07		2.32324e+07	2.20084e+07	3.11033e+07	2.12364e+07	1.80623e+07	2.76707e+07	2.07224e+07	1.95004e+07	1.96753e+07	2.08062e+07	3.00527e+07	2.01125e+07	2.67185e+07	2.26181e+07	2.17198e+07
0.87	1.1738e+07	1.07609e+07	1.33296e+07	1.12954e+07	9.64877e+06	1.00743e+07	1.31256e+07	8.86221e+06	1.33686e+07	9.61026e+06	1.41883e+07	1.17489e+07	9.73849e+06	7.99419e+06	1.30359e+07		2.32674e+07	2.24137e+07	2.98554e+07	2.03547e+07	1.6385e+07	2.57678e+07	2.03639e+07	1.6552e+07	1.91299e+07	2.0618e+07	2.63243e+07	2.04456e+07	2.45061e+07	2.06609e+07	2.07208e+07
0.85	9.79528e+06	1.04756e+07	1.11219e+07	9.65774e+06	7.94881e+06	7.70932e+06	1.10232e+07	6.75788e+06	1.05641e+07	8.3585e+06	1.32955e+07	9.92424e+06	8.29083e+06	6.40361e+06	1.16237e+07		1.74351e+07	1.69893e+07	2.24642e+07	1.4897e+07	1.18436e+07	1.91101e+07	1.54033e+07	1.23901e+07	1.46343e+07	1.61309e+07	1.99885e+07	1.59853e+07	2.10832e+07	1.66927e+07	1.55277e+07
0.83	8.29964e+06	8.71155e+06	8.68463e+06	7.90852e+06	6.60655e+06	6.15956e+06	9.98089e+06	5.33844e+06	8.10375e+06	7.08817e+06	1.02072e+07	8.74289e+06	7.01823e+06	5.01472e+06	9.51568e+06		1.26007e+07	1.26461e+07	1.82376e+07	1.05518e+07	8.79019e+06	1.57998e+07	1.1384e+07	1.03379e+07	1.16379e+07	1.27212e+07	1.58803e+07	1.23448e+07	1.993e+07	1.51785e+07	1.13842e+07
0.81	6.6377e+06	6.51022e+06	6.5405e+06	6070891	5.37273e+06	5.11719e+06	8.33789e+06	4.48232e+06	6.00169e+06	5.63954e+06	7.32196e+06	6.97735e+06	5.6272e+06	3.98304e+06	7.17383e+06		9.25743e+06	9.22941e+06	1.30242e+07	8.00387e+06	6.95839e+06	1.17183e+07	8.32019e+06	9.07187e+06	8.85312e+06	9.58961e+06	1.13786e+07	9.67721e+06	1.55836e+07	1.25941e+07	8.52024e+06
0.79	5.10998e+06	4.96131e+06	5.07337e+06	4617238	4.47957e+06	4.24337e+06	6.20129e+06	3.94065e+06	4.69947e+06	4.4792e+06	5.49644e+06	5.35568e+06	4.5483e+06	3.36467e+06	5.45492e+06		7.28342e+06	7.10443e+06	9.50288e+06	6.54385e+06	5.92593e+06	8.60555e+06	6.45559e+06	7.81397e+06	6.66967e+06	7.20896e+06	8.36503e+06	7.6029e+06	1.13203e+07	9.43397e+06	6.75664e+06
0.77	4.17119e+06	4.18315e+06	4.23504e+06	3.79629e+06	3.83031e+06	3.79222e+06	5.01877e+06	3.56654e+06	3.97255e+06	3.81063e+06	4.57802e+06	4.42264e+06	3.83484e+06	2.9642e+06	4.56641e+06		6.14701e+06	5.87893e+06	7.67746e+06	5.5295e+06	5.28162e+06	7.07762e+06	5.38039e+06	6.81633e+06	5.49756e+06	5.84932e+06	6.7513e+06	6.3601e+06	9.00313e+06	7.8673e+06	5.66444e+06
0.75	3.70839e+06	3.62214e+06	3.64035e+06	3.29686e+06	3.54028e+06	3.41315e+06	4.40433e+06	3.24617e+06	3.52058e+06	3.39974e+06	3944328	3.95254e+06	3.43458e+06	2.68704e+06	4.02431e+06		5.30689e+06	5.02607e+06	6.62678e+06	4.84115e+06	4.66358e+06	6.19248e+06	4.60203e+06	6.17161e+06	4.7382e+06	4.98854e+06	5.84882e+06	5.54494e+06	7.90469e+06	6.96914e+06	4.81156e+06
0.73	3.38003e+06	3.27406e+06	3.23229e+06	2.81144e+06	3.21701e+06	3.16704e+06	4.1149e+06	3.18351e+06	3.1672e+06	3.01915e+06	3.48081e+06	3.55675e+06	3.13027e+06	2.64452e+06	3.67057e+06		4.63694e+06	4.47109e+06	5.79357e+06	4.26191e+06	4.31901e+06	5.4717e+06	4.06501e+06	5.99999e+06	4.17048e+06	4.3645e+06	5.06254e+06	4.82961e+06	7.35973e+06	6.57405e+06	4.24619e+06
0.71	3.34642e+06	3.24944e+06	2.96304e+06	2.62251e+06	3.19387e+06	3.2699e+06	4.06516e+06	3.26507e+06	3.16757e+06	3.07784e+06	3.33871e+06	3.59184e+06	3.13792e+06	2.82441e+06	3.66478e+06		4.20557e+06	4.08346e+06	5.3841e+06	3.83981e+06	4.31291e+06	5.06265e+06	3.6577e+06	6359896	3.76227e+06	3.9437e+06	4.57818e+06	4.33908e+06	7.4213e+06	6.77807e+06	3.74541e+06
0.69	2.99228e+06	2.97096e+06	2.60017e+06	2.30695e+06	2.90403e+06	2.94133e+06	3.77494e+06	2.91746e+06	2.87963e+06	2.8038e+06	3.03227e+06	3.20344e+06	2.84905e+06	2.35429e+06	3.35946e+06		3.72573e+06	3.67046e+06	4.91265e+06	3.39433e+06	4.00896e+06	4.55061e+06	3.21506e+06	5.5329e+06	3.31962e+06	3.49375e+06	4.10303e+06	3.93464e+06	6.66945e+06	6.21568e+06	3.33584e+06
0.67	2.51713e+06	2.36074e+06	2.28418e+06	2.0757e+06	2.41005e+06	2.28727e+06	2.99432e+06	2.27854e+06	2.34219e+06	2.22946e+06	2.53061e+06	2.63315e+06	2.27127e+06	1.77579e+06	2.68478e+06		3.2973e+06	3.14151e+06	4.2769e+06	3.04751e+06	3.30582e+06	3.9787e+06	2.857e+06	4.30662e+06	3.00076e+06	3.10394e+06	3.57229e+06	3.52081e+06	5.37609e+06	4885120	2.97986e+06
0.65	2.05815e+06	1.93707e+06	2.06473e+06	1.77588e+06	2.03077e+06	1.89803e+06	2.50596e+06	1.84511e+06	1.90729e+06	1.83326e+06	2.20656e+06	2.21006e+06	1.91954e+06	1.37149e+06	2.1447e+06		3.01489e+06	2.82489e+06	3.70832e+06	2.69875e+06	2.77023e+06	3.49181e+06	2.51775e+06	3.65045e+06	2.56606e+06	2.76336e+06	3.05793e+06	3.09726e+06	4.57176e+06	4.10326e+06	2.60546e+06
0.63	1.88417e+06	1.75534e+06	1.80785e+06	1.61519e+06	1.84413e+06	1.6938e+06	2.26964e+06	1.68053e+06	1.71635e+06	1.63646e+06	1.93801e+06	1.98302e+06	1.75912e+06	1.26672e+06	1.95953e+06		2684656	2.54987e+06	3.3604e+06	2.43564e+06	2.53936e+06	3.15679e+06	2.2947e+06	3.31042e+06	2.34114e+06	2.51493e+06	2.76336e+06	2.8488e+06	4.08363e+06	3.70144e+06	2.33165e+06
0.61	1.73518e+06	1.58599e+06	1.67845e+06	1.51278e+06	1.63792e+06	1.51031e+06	2.02994e+06	1.50811e+06	1.57872e+06	1.40026e+06	1.81085e+06	1.78255e+06	1.56193e+06	1.10869e+06	1.71355e+06		2.44042e+06	2.3349e+06	3.03623e+06	2.17776e+06	2.2776e+06	2.92851e+06	2.13182e+06	2.98811e+06	2.10912e+06	2.25668e+06	2.51953e+06	2.58471e+06	3.74361e+06	3.34049e+06	2.12498e+06
0.59	1.54366e+06	1.50953e+06	1.61053e+06	1.40949e+06	1.59766e+06	1.41099e+06	1.94505e+06	1.42405e+06	1.49317e+06	1.37057e+06	1.67371e+06	1.71381e+06	1.41103e+06	992613	1.6169e+06		2.32847e+06	2.13136e+06	2.84272e+06	2.03992e+06	2.12511e+06	2.67911e+06	1.9671e+06	2.79453e+06	2.00402e+06	2.13802e+06	2.29405e+06	2.47331e+06	3.48822e+06	3.16687e+06	1.98424e+06
0.57	1.4598e+06	1.29078e+06	1.35404e+06	1.21629e+06	1.40907e+06	1.18358e+06	1.66322e+06	1.23566e+06	1.2949e+06	1.17992e+06	1.49667e+06	1.46727e+06	1.25826e+06	868186	1.46559e+06		2.02977e+06	1.93063e+06	2.54217e+06	1.87834e+06	1.91691e+06	2.46713e+06	1.71263e+06	2.5713e+06	1.77964e+06	1.95266e+06	1.97276e+06	2.16921e+06	3.15665e+06	2.80329e+06	1.73788e+06
0.55	1.21421e+06	1.10397e+06	1.25909e+06	1.12245e+06	1.27738e+06	1.11425e+06	1.50814e+06	1.13665e+06	1.14477e+06	1.00865e+06	1.36899e+06	1.35728e+06	1.16407e+06	786638	1.27122e+06		1.88367e+06	1.77081e+06	2.32063e+06	1.69606e+06	1.75224e+06	2.09373e+06	1.48219e+06	2.28214e+06	1.56654e+06	1.71444e+06	1.79363e+06	2.00557e+06	2.89399e+06	2.56064e+06	1.57081e+06
0.53	1.15031e+06	1.06972e+06	1.17391e+06	1.06101e+06	1.17977e+06	999881	1.39313e+06	1.02885e+06	1.09945e+06	937597	1.23728e+06	1.28958e+06	1.05037e+06	664303	1.19663e+06		1.75668e+06	1.67224e+06	2.09947e+06	1.48299e+06	1.61585e+06	2.05221e+06	1.32147e+06	2.1312e+06	1.39502e+06	1.64249e+06	1.63207e+06	1.82362e+06	2.67364e+06	2.42296e+06	1.42135e+06
0.51	1.04852e+06	943003	1.08833e+06	943650	1.09968e+06	860671	1.27077e+06	936882	1.03714e+06	908886	1.13944e+06	1.13454e+06	974575	601695	1.13432e+06		1.62319e+06	1.49515e+06	1.95754e+06	1.41864e+06	1.54501e+06	1.89356e+06	1.28841e+06	1.99071e+06	1.29599e+06	1.49949e+06	1.4791e+06	1.70887e+06	2.45316e+06	2.25157e+06	1.31689e+06

## Sheet: ver2
Table S3. Matrix of integrals obtained after binning the 1H spectra.
Bin	Cannibal
(ppm)	1	2	3	4	5	6	7	8	9	10	11	12	13	14	15
9.99	86924.6	28799.8	35846.6	34700.5	34517.2	90211.5	40092.5	-5756.15	57778.5	72508.9	57345.2	50258	17303.8	57591	27411.1
9.97	-7680.81	126061	52525.9	65140.9	35547.8	106515	-7759.2	69115	11894.6	56188.3	51061.1	23913.2	69133.4	53884.8	92841.6
9.95	69122.8	118608	35446.8	20099.5	16796.6	111066	33088.7	42189.8	25360.9	103634	58649.8	1781.1	50084.2	96616.9	79354.1
9.93	51578.5	112243	73725.2	53667.2	15587	66925.6	-4355.65	15479	73642.8	69068.9	72605	-49469.6	33600.7	83595.7	27967.6
9.91	82218.8	91587.1	44084.3	43366.9	37579.2	32533.9	24679.8	15512	49052.6	78064.4	105857	59086.8	97405.9	55396.3	118016
9.89	70534.5	65583.5	54251.1	39854.2	18990.2	56043.6	21512.5	58212	63658.9	114898	15931.8	5255.19	67832.9	109810	65656.5
9.87	62558.1	91923.6	77630.9	58722.8	6886.83	85446.6	62125.1	13982.2	9914.9	89182.1	51594.6	-6323.31	26016	49670.4	81023.6
9.85	55449.5	116310	48359.7	69525.7	32337.7	105123	-370.8	117373	56295.9	47545.2	66154	-1568.74	30805	83332.9	83721.1
9.83	35930.3	126977	38793.9	14121.1	16417.4	110924	7996.86	84974	45163.7	76600	52942.1	52223.7	489.61	69871.3	90730.4
9.81	40494.7	79272.6	49379.2	49557.6	44960.7	108183	36406.1	-743.72	32942.9	115176	25143.9	57411.8	130511	74193	101107
9.79	49148.3	122993	80394.9	27341.9	-30632.1	87264.5	21789.2	52831	35433.3	70703.9	20726.9	49455	63208	75560.6	86391.5
9.77	56112.9	106011	31428.4	90958.2	5331.8	60013.8	1442.85	18735	74445.3	96146.3	62137	63427.8	38758.3	25159.5	121198
9.75	54301.9	61946.9	45248	110661	69089.3	80939.1	5210.39	24561.2	23207.9	126068	68973.8	16193	80174.7	88197.4	73745.1
9.73	81996.1	103138	28207.1	71701.6	16380.9	96128.4	21746.8	54650.6	51337.5	122882	69861.1	55953.2	57025.4	111034	95841.8
9.71	98500.9	103377	43153.5	55695.6	35774	88757.4	56252.5	47484.7	83666.7	70985.8	12993.4	70622.9	68712.8	85815	66979.8
9.69	61831.9	113241	101152	50980.5	77395.9	115963	2326.99	4848.01	82687	137094	103738	23982.7	77687.8	95451.1	61750.8
9.67	88811.9	100177	73418.9	76696.9	40969.2	112065	59761.8	66627.8	44762.4	108981	53628.2	40859.1	52414.1	81050.9	96722.2
9.65	105263	147437	67997.5	42313.2	58272.2	114502	40566.1	49176.2	49276	110137	27537.8	83696.4	72681.2	107509	118769
9.63	81893.8	106136	94947	107029	55885.7	94595.9	78359	16862.8	108056	103072	114581	34134.5	86981.6	108886	161838
9.61	129659	129638	121055	80727.5	62243.5	89631.4	56734.6	110210	58982.8	130402	91633.9	44509.1	90105.1	90527.2	104298
9.59	155003	193184	193449	198648	89275.7	192300	76968.3	90815.8	107918	158823	206244	90877.6	163456	110525	208950
9.57	138776	144169	61056.1	81895.3	76798.9	122024	53415.8	33656.6	91888.1	92367.7	98823.3	93069.7	79149.9	49599	134752
9.55	91568.4	153887	30883.4	72614	61375.7	135240	60228.7	77855.5	81749.8	145914	61755.1	34532.5	87081.5	98855.5	63404.4
9.53	91438.8	114966	144005	74127.8	15938.9	129174	62220.9	93225.4	77510.6	111552	127553	57064.3	56418.5	129596	116516
9.51	107284	164372	78876.2	78138.9	86446.5	131760	97436.4	69322.1	108428	97505.8	92605.8	58433.9	88705.9	130269	146771
9.49	108624	131261	102967	122680	36795.4	119342	63338.8	130457	107618	181303	87899.4	123496	86367.4	129969	130629
9.47	148544	120132	145775	70413.8	110505	139110	73272.4	23307.9	120189	128621	110025	37696.4	121734	151506	111092
9.45	128776	135713	111451	72068	68010.2	149597	64382	48574.3	120484	120908	122456	41430.5	102282	92894.6	156751
9.43	205561	146879	71214.7	118136	48505.1	127965	66165.1	155077	72716.8	178038	107839	106653	138121	141387	132807
9.41	113996	105098	168074	121101	53812.2	179593	137860	132897	108312	113354	138360	113423	104368	93974.9	147249
9.39	162342	161132	191244	183416	73650.4	207326	121645	85090.9	116768	153020	140742	152246	131708	149774	249399
9.37	175796	182402	114994	136340	109454	166996	89939.3	129601	93454.9	154380	127411	99985.9	123918	133554	125104
9.35	152935	183512	160010	183767	144215	154395	121011	90569	170950	204994	195637	109870	186219	125476	201782
9.33	173498	189859	234569	198523	108823	161348	146602	159719	166054	192746	213789	174596	139120	190444	201050
9.31	143264	206863	148169	157751	110505	133749	115911	99852	115440	164602	116186	35207.8	93568.6	138001	182449
9.29	199677	125311	152503	190874	96180.5	181470	147621	118652	139358	151982	202030	108350	126144	180917	183202
9.27	171408	149407	122509	123895	80882.9	119396	135730	106350	112809	158364	148634	145997	136594	125207	132949
9.25	165618	198942	187130	194468	140330	129826	100040	56416.7	186039	175405	170972	78049.6	148201	118265	174335
9.23	137501	139885	217405	178283	66153.7	201717	97741.8	120750	161541	218240	186256	118066	167107	177566	215901
9.21	163429	224941	132595	109688	116108	151033	75849.1	101098	117146	169561	179524	91158.4	105755	150864	197019
9.19	138923	205454	167373	171754	117994	128820	137105	162797	135009	162081	143288	98985.2	168186	210900	222501
9.17	141649	222508	140620	182792	72765.3	169977	159963	58374.3	113281	191921	178895	141333	142643	133333	174226
9.15	129718	213239	146494	142343	97344.4	190941	141455	90279.4	129860	181416	158382	83758.6	146188	170482	213320
9.13	190730	186871	164759	191339	111516	155647	147271	92661.5	158037	212003	141543	139340	144656	158782	205439
9.11	146639	169978	144622	140667	90582.5	158986	98163.4	96884.1	154680	177457	153074	125970	99184.6	147401	234363
9.09	216774	178267	189079	138811	101171	166821	130046	143982	146197	187951	191318	155920	140884	183450	209601
9.07	186739	250055	188913	194696	124264	176852	64555.2	113376	141477	201811	199401	121238	176748	188235	253574
9.05	182902	169371	135616	136380	103736	182154	153823	131701	136120	154590	143753	100303	126900	140156	164741
9.03	208185	160918	199857	110663	126853	174292	150635	129188	166660	201149	200686	100318	206182	150585	208899
9.01	164860	212634	186140	155447	110923	168946	127007	83330.9	150950	193804	148307	118851	159476	130205	208013
8.99	221648	222157	242728	237968	119709	211385	192692	143842	214262	221897	203893	202061	211202	203144	259472
8.97	223533	247055	158643	210351	98442.5	183875	117233	138518	175966	179618	194384	122887	224665	192286	254475
8.95	180939	234829	176365	196872	89391.8	179560	141009	77798.1	193272	190579	158266	111316	128547	201076	211617
8.93	283965	334755	192810	257384	237737	335222	259814	241005	242286	292237	214841	190536	234602	301324	266639
8.91	205992	221544	185481	229742	115369	232732	146129	196593	201870	216390	180140	143466	157843	186604	244981
8.89	206516	234992	196540	176456	114714	221518	164086	146249	170478	201321	177751	182144	182625	219177	244689
8.87	214790	214182	173972	136629	112567	174925	100510	152530	162095	193881	162768	132826	165297	180507	250822
8.85	209926	251324	211909	116248	144852	193882	177202	143154	136117	246247	168028	121205	214396	208759	233830
8.83	227942	245190	210077	225851	98512.8	219562	190538	145052	166410	212822	258289	170523	166065	211146	249217
8.81	199723	259728	222950	235233	167379	180153	154915	133115	166820	253940	135614	138261	208559	191024	214965
8.79	197934	197497	186726	246488	119941	214140	151344	131686	214781	254085	156487	135229	199309	202023	281716
8.77	203151	234619	220677	215354	97122.8	208397	140064	102289	229854	231188	206235	155641	164224	203075	216821
8.75	189825	244262	179109	177770	108816	217166	178920	171667	181961	266513	189841	165944	196817	160474	215499
8.73	223082	295691	136994	138900	136891	200745	144252	211149	226306	260220	180867	107968	177855	147567	222579
8.71	179442	251079	196371	210814	135653	192577	182797	181219	184492	260436	233259	105487	195696	159303	231906
8.69	233379	243072	169205	161768	196714	255233	131754	186326	178573	252092	265832	123249	152639	247045	253325
8.67	181687	201453	165051	171783	156773	218164	164654	204159	179434	204757	205767	134463	193302	191593	269043
8.65	256495	219114	217896	166360	186307	219328	201690	147480	220941	210228	258439	177143	175078	169508	215683
8.63	247997	241570	273137	184180	154532	257221	188610	182226	193905	227313	258587	125593	188491	208129	294182
8.61	320065	318217	270835	289770	194894	310864	270095	263272	265134	342245	307655	175085	236287	261220	339530
8.59	379750	392054	609686	814902	263035	391120	288164	315737	498400	345607	455962	326121	369364	357355	653227
8.57	320154	308158	287683	289458	210221	314876	222561	285208	333940	315842	285056	243185	246778	282623	415616
8.55	299289	312940	265147	214170	148118	291818	238186	213727	260411	306150	270668	224087	223746	216900	359709
8.53	252839	278321	322761	288792	154283	283490	252203	233384	267025	351173	285304	185035	226175	228306	337485
8.51	266995	288451	250504	249619	197858	314130	213393	171745	300235	269792	300031	190007	244118	279096	319515
8.49	309268	288937	225871	227979	205283	266456	211530	268164	327378	312726	362481	235936	257929	190494	427472
8.47	296522	340821	288725	354187	235492	341093	245050	229774	383390	338632	382574	218801	263237	271137	434223
8.45	338122	456459	457831	424042	258352	454372	413367	325952	553083	432312	573871	342515	452882	610090	556848
8.43	324485	336243	328017	269879	192424	259419	280246	240865	389727	310851	388528	211257	301862	305798	452322
8.41	314032	321868	338289	311580	233163	312732	254307	259415	328160	323189	398557	259296	329865	261621	398464
8.39	369521	371288	354717	363567	252366	361648	224837	266795	405153	380430	411227	288724	317743	294529	478753
8.37	473044	475123	556204	474703	349663	582266	362003	423874	469757	494842	537796	368512	456299	469783	601696
8.35	407062	478884	422450	423858	321657	448510	383880	414557	455864	487323	471100	348090	373623	437111	536558
8.33	432027	419849	528385	550108	262029	444166	370192	444744	515016	438807	471715	384552	364182	394085	604771
8.31	354961	422044	410475	393776	285819	364481	370453	311479	479595	394509	490224	345080	397803	379924	602247
8.29	375899	416058	446398	426275	254117	422260	300690	342473	454931	385542	573668	374123	408463	369912	598344
8.27	394869	509012	494539	431915	380449	449511	449341	313943	508641	435384	547081	439270	427015	389487	652149
8.25	622954	547858	743272	983045	490422	620068	521230	543221	659230	516952	669466	513121	541307	562166	833210
8.23	580644	609611	739657	761454	474045	621347	540865	661331	695568	705845	803763	586965	612048	646495	965535
8.21	1.03487e+06	1.1642e+06	1.25818e+06	1.23064e+06	880697	1.03638e+06	980580	1.78172e+06	1.13795e+06	1.38812e+06	1.53152e+06	1.04774e+06	1.19216e+06	1.09401e+06	1.83498e+06
8.19	1.19524e+06	1.3157e+06	1.61413e+06	1.53263e+06	982200	1.17919e+06	1.05299e+06	2.26323e+06	1.47456e+06	1.59712e+06	1.86232e+06	1.17589e+06	1.37662e+06	1.30365e+06	2.35795e+06
8.17	847475	761434	1.10504e+06	955411	592544	771887	792046	1.5361e+06	1.00396e+06	1.00552e+06	1.21716e+06	837364	851551	961708	1.56117e+06
8.15	544445	477912	545391	536494	357085	519944	419430	516591	610222	493337	672335	454455	496784	490889	746161
8.13	593402	589138	642077	716160	412615	648598	529164	567314	910361	577481	904437	574320	608715	582481	1.0006e+06
8.11	702288	737840	948687	1.12461e+06	557371	742665	675224	758532	1.02768e+06	722513	1.19261e+06	883360	751010	634502	1.22132e+06
8.09	600797	670571	775001	1.03245e+06	460766	657324	535808	502978	780030	649397	905279	620896	655315	574595	1.00984e+06
8.07	607962	676429	657019	624337	490472	708222	547993	552253	738439	593620	811002	584897	600766	581659	856516
8.05	604286	638229	682723	688507	419073	681020	553572	605903	812099	629002	867958	584985	586051	556514	950336
8.03	674901	777643	781665	759476	533347	782662	610321	707432	981566	678037	980526	652530	728216	659524	1.14418e+06
8.01	593298	644719	689891	674244	410188	671475	492197	607485	856327	632108	867092	564096	645878	622723	954396
7.99	633718	632880	685637	743917	459667	712789	482350	581790	862182	666215	938272	560816	552139	567452	933623
7.97	739707	1.83898e+06	3.14491e+06	864084	743209	805358	1.46477e+06	686362	1.05802e+06	1443019	5.68012e+06	1.34044e+06	779551	5.58732e+06	5.61313e+06
7.95	8.42478e+06	7.21464e+06	9.73094e+06	1.16901e+07	1.05005e+07	7.7227e+06	7.03052e+06	9.91574e+06	8.17896e+06	7.28968e+06	3.77136e+06	8.64383e+06	6.57574e+06	2.89722e+06	8.55206e+06
7.93	3.43837e+06	3.06783e+06	1.99615e+06	2.15259e+06	2.6536e+06	3.86383e+06	2.71884e+06	4.1765e+06	2.27018e+06	3.21984e+06	2.46317e+06	2.43366e+06	2.68681e+06	3.98669e+06	2.86661e+06
7.91	1.12428e+06	952374	966071	967460	837408	1.23341e+06	941647	1.22057e+06	1.27807e+06	923965	1.2072e+06	949374	1.12938e+06	923027	1.39213e+06
7.89	938523	864533	840394	882749	831321	1.1674e+06	847652	1.08732e+06	1.05212e+06	1.02469e+06	1.11324e+06	898987	923167	916279	1.20707e+06
7.87	1.24794e+06	1.07058e+06	967132	1.02146e+06	1.1312e+06	1.52834e+06	1.03876e+06	1.59565e+06	1.21503e+06	1.24755e+06	1.18073e+06	1.14515e+06	973644	1.06588e+06	1.22067e+06
7.85	791901	865416	927286	907018	703155	957453	798313	786796	1.05832e+06	848145	1.06607e+06	823915	887807	788528	1.08702e+06
7.83	735811	768219	825607	843048	560443	865588	719000	699396	1.00126e+06	706967	1.06e+06	743057	868383	683393	1.00792e+06
7.81	652807	737277	780571	765317	627501	753412	653164	631453	911827	668387	928100	696476	784520	592203	965260
7.79	619088	698347	693767	749066	530391	629088	636838	583119	801876	655302	833256	643928	701770	570889	831811
7.77	607210	711568	726283	749404	537725	664347	633381	575085	897263	652803	828946	639197	699246	567083	868647
7.75	736851	864979	1.64969e+06	1.38319e+06	717325	754036	704641	655118	1.63196e+06	760634	1.17198e+06	865932	955058	704205	1.48362e+06
7.73	1.13195e+06	933261	1.00799e+06	1.10527e+06	1.02259e+06	1.23666e+06	1.25585e+06	1.38307e+06	979610	1.21748e+06	1.04432e+06	1.385e+06	1.07979e+06	1.29861e+06	1.11589e+06
7.71	1.23538e+06	1.04195e+06	1.34828e+06	1.26864e+06	1.06596e+06	1.41646e+06	1.37289e+06	1.50504e+06	1.35594e+06	1.38769e+06	1.22322e+06	1.47024e+06	1.28131e+06	1.46714e+06	1.3986e+06
7.69	692841	693471	886728	805927	575152	748370	722212	751791	778864	756881	852925	664509	706566	649096	878157
7.67	872196	830923	656407	630799	642021	872825	626076	889057	667178	873516	676194	654353	677634	751942	765174
7.65	582988	527221	601573	550945	491417	622249	545137	509311	580095	609047	632131	540208	576714	504136	677667
7.63	500154	527551	564625	591322	480889	536398	504957	434896	535350	515684	625428	480605	605181	476305	645998
7.61	544470	596009	585884	586645	465871	548677	453546	445340	538050	599136	574031	493628	484958	441059	589692
7.59	563424	586230	573864	555916	428152	527638	484084	448908	522858	568411	581220	447689	500302	425970	571636
7.57	611788	611552	592850	547029	488697	597175	557080	494463	572719	557084	577816	552950	530352	510290	638502
7.55	670833	718756	648537	635421	509316	646181	644520	541577	615363	670621	658581	602973	563330	610343	700844
7.53	2.60217e+06	2.41614e+06	1.67059e+06	1.7919e+06	2.36616e+06	2.99112e+06	2.71145e+06	3.52906e+06	1.73442e+06	2.86913e+06	1.8191e+06	2.63121e+06	2.23082e+06	3.47101e+06	2.13939e+06
7.51	1.54612e+06	1.29006e+06	1.31975e+06	1.30493e+06	1.20707e+06	1.69124e+06	1.61765e+06	1.85824e+06	1.44881e+06	1.59249e+06	1.21924e+06	1.60744e+06	1.29353e+06	1.93988e+06	1.44412e+06
7.49	794574	737227	714817	674286	653359	760429	681355	640482	719303	725528	726707	659324	670298	627763	768840
7.47	811674	819580	822506	737215	690373	790785	786079	659197	744210	810597	829167	673277	757919	684708	907016
7.45	832611	883818	781541	768638	674064	875693	793658	686563	701674	884211	842533	779710	782762	809119	946404
7.43	2.59815e+06	1.98687e+06	2.22325e+06	2.29642e+06	2.14172e+06	2.9745e+06	2.91592e+06	3.35418e+06	2.24752e+06	2.53903e+06	2.16529e+06	2.8302e+06	2.35208e+06	3.5488e+06	2.65844e+06
7.41	7.5851e+06	4.89492e+06	5.45638e+06	6.46825e+06	6.04896e+06	8.68668e+06	8.08797e+06	1.07211e+07	6.95802e+06	6.71955e+06	5.35563e+06	8.72004e+06	6.71694e+06	1.05342e+07	7.13037e+06
7.39	1.52796e+06	1.21175e+06	1.28818e+06	1.22112e+06	1.03845e+06	1.46402e+06	1.32915e+06	1.40118e+06	1.55263e+06	1.23663e+06	1.17914e+06	1.31681e+06	1.15275e+06	1.51138e+06	1.5217e+06
7.37	4.48892e+06	3.1622e+06	3.26349e+06	3.7934e+06	3.64493e+06	5.02525e+06	4.72406e+06	5.93981e+06	4.01513e+06	4.02095e+06	3.33945e+06	4.99116e+06	3.95101e+06	5.67396e+06	4.19291e+06
7.35	2.59473e+06	1.89512e+06	2.29717e+06	2.20444e+06	1.94385e+06	2.67174e+06	2.4552e+06	2.81838e+06	2.68742e+06	2.19048e+06	2.14441e+06	2.49772e+06	2.09955e+06	2.88603e+06	2.58749e+06
7.33	5.09214e+06	3.75547e+06	3.61498e+06	4.41687e+06	4.39358e+06	5.86969e+06	5.62612e+06	7.01527e+06	4.13249e+06	4.77243e+06	3.83456e+06	5.85317e+06	4.61125e+06	6.23023e+06	4.71396e+06
7.31	8.52259e+06	5.42131e+06	6.86631e+06	7.49426e+06	6.71814e+06	9.44633e+06	9.10602e+06	1.16969e+07	8.69802e+06	7.71399e+06	6.1823e+06	9.85186e+06	7.52328e+06	1.20054e+07	8.08263e+06
7.29	2.02374e+06	1.6128e+06	1.82212e+06	1.75126e+06	1.66422e+06	1.99321e+06	1.99234e+06	1.8412e+06	1.96642e+06	1.7681e+06	1.76954e+06	1.9862e+06	1.66268e+06	1.81597e+06	1.98935e+06
7.27	2.4165e+06	2.07854e+06	2.30238e+06	2.29053e+06	2.16843e+06	2.49611e+06	2.77428e+06	2.7325e+06	2.27412e+06	2.48376e+06	2.12419e+06	2.79989e+06	2.22888e+06	2.61775e+06	2.40206e+06
7.25	2.19481e+06	1.94779e+06	2.23573e+06	2.04431e+06	1.87235e+06	2.16203e+06	2.28559e+06	2.17117e+06	2.26683e+06	2.08648e+06	2.07758e+06	2.27714e+06	1.93419e+06	2.02823e+06	2.24585e+06
7.23	1.66391e+06	1.7117e+06	1.7559e+06	1.65001e+06	1.44033e+06	1.6339e+06	1.75113e+06	1.49887e+06	1.72463e+06	1.67966e+06	1.70989e+06	1609069	1.47512e+06	1.36809e+06	1.82078e+06
7.21	1.67601e+06	1.6598e+06	1.5806e+06	1.46223e+06	1.48219e+06	1.72552e+06	1.79939e+06	1.64513e+06	1.55683e+06	1.76697e+06	1.55093e+06	1.6517e+06	1.50092e+06	1.49339e+06	1.66894e+06
7.19	5.50533e+06	3.58372e+06	2.82514e+06	3.24243e+06	6.18225e+06	8.89405e+06	9.76579e+06	1.17803e+07	3.34163e+06	9.20494e+06	3.22869e+06	1.04226e+07	6.05869e+06	1.12137e+07	3.92248e+06
7.17	5.38909e+06	3.27293e+06	2.78881e+06	3.03897e+06	5.64128e+06	8.67755e+06	9.34116e+06	1.1343e+07	3.62496e+06	8.67212e+06	3.18408e+06	1.00505e+07	5.73795e+06	1.12134e+07	4.01677e+06
7.15	1.89438e+06	1.67047e+06	1.7654e+06	1.57174e+06	1.59812e+06	1.71851e+06	1.85704e+06	1.59988e+06	1.79065e+06	1.66869e+06	1.71657e+06	1.79341e+06	1.54278e+06	1.50359e+06	1.90027e+06
7.13	1.96968e+06	1.92865e+06	1.89003e+06	1.72412e+06	1.79829e+06	1.9596e+06	1.92703e+06	1.7631e+06	2.00456e+06	1.79849e+06	1.89757e+06	1.88531e+06	1.70739e+06	1.73781e+06	2.28525e+06
7.11	9.72075e+06	9.22227e+06	1.32362e+07	1.24537e+07	1.21747e+07	8.85948e+06	9.2557e+06	1.10741e+07	9.31493e+06	8.79445e+06	9.69348e+06	1.05568e+07	7.88395e+06	8.31566e+06	1.4153e+07
7.09	2.03203e+06	1.83508e+06	1.97437e+06	1.90572e+06	1.74092e+06	1.78412e+06	1.84866e+06	1.67287e+06	1.87718e+06	1.70955e+06	1.82952e+06	1.78515e+06	1.70849e+06	1.42611e+06	2.03025e+06
7.07	1.71108e+06	1.69637e+06	1.68272e+06	1.54325e+06	1.51806e+06	1.54704e+06	1.73073e+06	1.55563e+06	1.5962e+06	1.56199e+06	1.60839e+06	1.57253e+06	1.47585e+06	1.35431e+06	1.7577e+06
7.05	1.60712e+06	1.64413e+06	1.55241e+06	1.42494e+06	1.3908e+06	1.49046e+06	1.63178e+06	1.33758e+06	1.46026e+06	1.4645e+06	1.51689e+06	1.47201e+06	1.41897e+06	1.2919e+06	1.71178e+06
7.03	1.76302e+06	1.75724e+06	1.91428e+06	1.70826e+06	1.54241e+06	1.89411e+06	2.04132e+06	1.60755e+06	1.55485e+06	1.79858e+06	1.89992e+06	1.71624e+06	1.65443e+06	1.73771e+06	2.02684e+06
7.01	1.50746e+06	1.48058e+06	1.57029e+06	1.34621e+06	1.3109e+06	1.4194e+06	1.58073e+06	1.3214e+06	1.42173e+06	1.46039e+06	1.46029e+06	1.438e+06	1.33684e+06	1.25621e+06	1.57646e+06
6.99	1.40928e+06	1.44036e+06	1.3738e+06	1.29589e+06	1.27192e+06	1.37287e+06	1.50534e+06	1.32171e+06	1.3837e+06	1386991	1.39889e+06	1.40641e+06	1.3463e+06	1.21421e+06	1.50877e+06
6.97	1.52614e+06	1.46401e+06	1.47212e+06	1.35421e+06	1.36609e+06	1.43348e+06	1.56368e+06	1.34533e+06	1.41497e+06	1.39625e+06	1.39472e+06	1.40897e+06	1.42648e+06	1.20495e+06	1.61756e+06
6.95	1.45461e+06	1.5045e+06	1.45144e+06	1.31545e+06	1.32275e+06	1.42974e+06	1.54903e+06	1.30533e+06	1.36413e+06	1.40259e+06	1.39521e+06	1.44737e+06	1.38763e+06	1.23537e+06	1.5664e+06
6.93	1.49424e+06	1.52077e+06	1.42385e+06	1.41629e+06	1.39087e+06	1.4749e+06	1.60657e+06	1.38267e+06	1.45207e+06	1.49075e+06	1.49556e+06	1.47842e+06	1449378	1.25215e+06	1.5932e+06
6.91	1.60767e+06	1.5129e+06	1.42799e+06	1.41798e+06	1.55323e+06	1.75418e+06	2.05232e+06	1.71802e+06	1.40455e+06	1.90377e+06	1.49644e+06	1.85444e+06	1.52949e+06	1.50973e+06	1.61973e+06
6.89	7.13485e+06	4.21131e+06	2.43346e+06	3.23102e+06	7.98585e+06	1.21243e+07	1.38703e+07	1.60478e+07	3.23795e+06	1.30762e+07	3.4892e+06	1.45755e+07	7.99961e+06	1.48185e+07	4.27758e+06
6.87	2.51997e+06	1.77989e+06	1.80439e+06	1.70532e+06	2.06919e+06	3.18818e+06	3.40751e+06	3.7981e+06	2.26468e+06	3.09029e+06	1889127	3.43447e+06	2.38613e+06	4.64005e+06	2.33243e+06
6.85	2.1855e+06	1.94229e+06	1.64163e+06	1.67076e+06	1.80549e+06	2.46902e+06	3.32638e+06	2.42614e+06	1.70542e+06	2.74746e+06	1.83096e+06	2.76234e+06	2.15651e+06	2.26738e+06	2.0663e+06
6.83	2.07143e+06	1.56802e+06	1.70557e+06	1619388	1.51796e+06	1.79753e+06	1.908e+06	1.83277e+06	1.72591e+06	1.77366e+06	1.71691e+06	1.6766e+06	1.55278e+06	2.09614e+06	1.86378e+06
6.81	1.74616e+06	1.69462e+06	1.76027e+06	1.58379e+06	1.3766e+06	1.63212e+06	1.692e+06	1.50638e+06	1.7121e+06	1.62998e+06	1.70787e+06	1.54286e+06	1.46239e+06	1.55918e+06	1.78234e+06
6.79	1.55146e+06	1.61271e+06	1.83945e+06	1.50561e+06	1.2755e+06	1.44876e+06	1.59306e+06	1.44521e+06	1.71615e+06	1.45514e+06	1.63715e+06	1.44779e+06	1.42036e+06	1.37107e+06	1.71765e+06
6.77	1.45507e+06	1.45081e+06	1.38825e+06	1.30381e+06	1.26294e+06	1.4241e+06	1.47892e+06	1.38905e+06	1.3827e+06	1.41386e+06	1.43244e+06	1.38777e+06	1.33989e+06	1.35926e+06	1.52318e+06
6.75	1.72127e+06	1699631	1.69903e+06	1.46865e+06	1.41326e+06	1.82319e+06	2.33157e+06	1.80844e+06	1.62568e+06	2.13698e+06	1.67109e+06	1.94919e+06	1.69082e+06	1.72435e+06	1.68871e+06
6.73	1.78796e+06	1.4266e+06	1.28821e+06	1.23405e+06	1.23522e+06	1.58492e+06	1.95053e+06	1.69537e+06	1.3059e+06	1.75184e+06	1.32714e+06	1.69145e+06	1.38809e+06	1.93767e+06	1.50423e+06
6.71	1.41541e+06	1.30998e+06	1.22207e+06	1.18287e+06	1.06287e+06	1.25817e+06	1.35226e+06	1.26512e+06	1.26401e+06	1.32963e+06	1.23654e+06	1.15612e+06	1.13332e+06	1.56312e+06	1.37066e+06
6.69	1.23588e+06	1.14677e+06	1.39105e+06	1.1372e+06	991581	1.30775e+06	1.42708e+06	1.10624e+06	1.06597e+06	1.28261e+06	1.4021e+06	1.1502e+06	1.14421e+06	1.37598e+06	1.43459e+06
6.67	1.09658e+06	1.04504e+06	1.05971e+06	908952	814331	1.01209e+06	1.14483e+06	940340	982154	1.04032e+06	1.07987e+06	988013	948382	1.0085e+06	1.22555e+06
6.65	1.02124e+06	950587	900822	792800	842993	931550	919695	814566	887041	890282	952014	857287	845033	815074	1.01196e+06
6.63	967017	1.01349e+06	949410	803512	864140	940620	945048	815967	867278	929705	896052	884865	799968	780036	1.03996e+06
6.61	970404	883947	847199	777313	763436	889732	876959	789452	820471	867425	907762	812492	795726	778096	1.04386e+06
6.59	961130	871399	827505	739160	755763	875706	820631	696457	777384	829917	830786	728359	689593	781026	981998
6.57	862959	825792	791370	744649	672550	781183	795975	719711	693017	787405	793951	746973	731381	745123	939689
6.55	810631	763666	721367	597143	579683	697144	760776	666550	637155	713952	698754	598821	654404	692127	772864
6.53	716148	717610	599625	614828	620032	610733	647565	598205	645365	659088	680977	609775	701709	591315	764507
6.51	718464	631930	634880	613691	539852	712249	571305	619599	668416	634446	568634	554357	651229	589598	731199
6.49	632718	630332	567212	526788	540708	601169	603205	521580	548745	571189	615243	517413	563685	530708	646034
6.47	563617	587298	535172	465442	446484	547775	540561	523902	506657	579394	561572	484464	475465	501115	627212
6.45	535522	558609	565432	496621	396132	556682	556698	480400	528501	526629	552189	514282	480017	538017	586488
6.43	495681	556563	508572	455552	442249	490191	510010	418174	485517	531292	518846	433052	473837	421461	587117
6.41	497232	535385	432269	396349	410614	462992	486372	397808	476635	535745	445567	423134	447208	440072	520287
6.39	484794	470826	490450	398178	346392	468987	410281	416512	426633	464330	480597	422034	424934	464284	515742
6.37	484488	469889	432876	427299	373363	453594	366686	389541	452298	438824	441008	399774	437958	384487	544312
6.35	422633	418654	389640	459861	362523	435269	350596	380479	427950	430190	432474	373150	343690	376565	466260
6.33	441772	491533	472396	428319	345393	422900	395322	410714	422904	459537	500195	384297	414574	384518	475138
6.31	466797	434036	435627	428807	295139	457122	410897	382407	451879	444537	464896	341397	354435	445783	500902
6.29	428474	434810	402353	437881	342453	445555	321384	385087	417507	358144	403228	303184	385128	319582	465095
6.27	401692	418620	340177	388950	280558	343020	314396	346226	397091	396872	392395	314313	307766	363954	495031
6.25	387426	454244	408684	415240	249113	433546	269209	272188	390213	411634	463281	333453	387807	365971	489129
6.23	384531	418856	413311	377275	288236	425601	343747	310369	460441	361819	408464	358549	342410	378267	523719
6.21	348775	352652	356553	375847	272677	405436	289588	311073	385312	388875	385112	250556	308121	337555	446281
6.19	377514	411930	561130	502271	345023	392829	413979	288875	523134	474288	566555	429220	444270	350726	669104
6.17	382602	420453	474221	440941	291070	403624	355461	349883	517090	406075	439203	304115	388205	333449	611693
6.15	384851	460214	520325	592470	267243	414487	345132	345709	482270	405093	445421	347731	407114	394477	622093
6.13	547589	621615	1.06352e+06	1.32813e+06	414627	641804	516075	611627	825735	596306	812357	590401	738490	604436	1.2021e+06
6.11	506421	454544	565429	607247	338314	539324	415911	437969	580712	492225	637680	476772	542000	433794	768177
6.09	728203	741546	872316	894897	489460	770456	620992	814274	855571	771863	1.05435e+06	676148	737562	750138	1.16713e+06
6.07	601388	662988	825791	790313	467514	812631	564327	622858	919592	676568	962142	600306	711202	672421	1.19773e+06
6.05	728703	783347	863886	902740	540326	898037	687190	789209	1.19268e+06	771689	1.14818e+06	757453	942822	865605	1.41125e+06
6.03	510086	622226	622738	627506	383906	677952	496113	450831	775021	524872	798549	491810	614586	556356	833170
6.01	548847	641934	669378	722875	434344	640970	514212	536091	895521	614727	886223	565388	682649	516616	904217
5.99	677504	821905	1.11056e+06	1.48096e+06	494751	818874	716904	615283	1.11533e+06	788590	1.13393e+06	999096	910244	660372	1.26194e+06
5.97	836753	895642	1.24261e+06	1.48097e+06	667963	922724	826280	872760	1.47032e+06	900033	1.35759e+06	1.05707e+06	1.0361e+06	834092	1.59671e+06
5.95	826309	944145	1.12925e+06	1.23952e+06	674033	1.06886e+06	887648	931279	1.42424e+06	945532	1462654	970992	1.06336e+06	740710	1.57251e+06
5.93	1.02261e+06	1.24739e+06	1.44014e+06	1.55903e+06	1.0105e+06	1.47834e+06	1.10767e+06	1.32415e+06	1.70785e+06	1.23095e+06	1.78873e+06	1.20874e+06	1.47949e+06	1.16081e+06	2.03077e+06
5.91	1.50856e+06	1.39562e+06	1.2349e+06	1.37184e+06	1.35223e+06	1.91224e+06	1.3045e+06	2.08691e+06	1.52257e+06	1.65239e+06	1.65033e+06	1.48521e+06	1.23766e+06	1.28112e+06	1.54224e+06
5.89	1.66564e+06	1.5185e+06	1.44587e+06	1.62725e+06	1.43697e+06	2.20743e+06	1.52666e+06	2.21722e+06	2.01501e+06	1.83752e+06	2.14081e+06	1.6814e+06	1.55976e+06	1.55114e+06	2.11147e+06
5.87	1.02776e+06	1.20355e+06	1.34664e+06	1.41325e+06	876672	1.34036e+06	1.04331e+06	1.23011e+06	1.85844e+06	1.17722e+06	2.08237e+06	1.24771e+06	1.36079e+06	1.02705e+06	2.06423e+06
5.85	824905	989825	1.14471e+06	1.24634e+06	765861	1.12105e+06	945943	931256	1.55561e+06	1.02352e+06	1.71704e+06	1.06828e+06	1.13646e+06	904090	1.64308e+06
5.83	778280	1.01972e+06	1.08758e+06	1.18307e+06	746625	1.04164e+06	840036	900099	1.45877e+06	948522	1.55341e+06	949128	1.11912e+06	783215	1.58057e+06
5.81	879173	1.10694e+06	1.18443e+06	1.24012e+06	818108	1.07322e+06	882742	955914	1.53316e+06	1.02193e+06	1.63704e+06	1.05851e+06	1.16531e+06	900856	1.62564e+06
5.79	2.15202e+06	2.3782e+06	1.62182e+06	1.77609e+06	1.95725e+06	2.64094e+06	2.13521e+06	2.85097e+06	1.93271e+06	2.50722e+06	2.12612e+06	2.14578e+06	2.12025e+06	2.6178e+06	2326845
5.77	957457	1.05597e+06	1.02783e+06	1.11278e+06	757150	1.14663e+06	861365	1.04513e+06	1.23871e+06	1.0794e+06	1.43317e+06	996234	1.07983e+06	941870	1.4453e+06
5.75	702811	824607	875498	911143	555411	818461	731996	634323	1.04947e+06	815450	1.08879e+06	755613	822115	674004	1.10324e+06
5.73	579025	756758	775391	823398	515704	752673	579073	556801	900631	689274	968721	669322	681329	568042	1.01484e+06
5.71	496043	604285	642637	710154	477905	587309	516468	480632	765183	623198	761191	534175	636122	486973	747424
5.69	452316	561101	616473	615203	391997	566188	437738	425754	654265	603428	703493	452878	518455	479040	697436
5.67	431475	482060	524515	540426	371921	500132	354830	373015	487558	540679	580257	386930	459284	414262	576267
5.65	432311	496214	535177	509267	370205	512919	422246	352696	585443	527458	623803	435395	461976	386390	571578
5.63	463603	498548	531019	490816	287050	500604	343990	312245	539529	501642	568781	421696	354918	481730	548428
5.61	1.60059e+06	2.22461e+06	2.55685e+06	2.74273e+06	1.46183e+06	2.11114e+06	1.94825e+06	1.86939e+06	2.40742e+06	2.20795e+06	2.74509e+06	2.23955e+06	1.98232e+06	2.15161e+06	3.04003e+06
5.59	449064	469374	443477	499232	297650	460425	348327	315653	404525	455173	482371	358136	375907	371380	541898
5.57	361782	354637	350806	303826	213853	324214	309579	221077	384486	367089	343316	283642	276123	310366	346480
5.55	339162	403262	343472	319554	223277	337509	275432	246872	268210	327246	318567	323065	319074	275604	346959
5.53	352456	399473	341402	287519	191080	303799	223932	192906	298566	297214	340590	179385	233602	259370	356002
5.51	313012	335821	374145	353155	200979	323659	197155	226556	335032	361793	347025	230803	249182	311953	374529
5.49	455734	365851	294899	293625	230841	398251	252916	237181	302092	357189	322995	215295	290806	337451	318268
5.47	339249	297611	319862	324955	160935	341580	235361	230786	314881	360039	371285	233065	225424	305357	318702
5.45	330429	326865	288419	250652	231620	368784	274245	149924	340377	393071	308757	253363	209104	320741	352519
5.43	354257	399643	324879	233825	177017	358791	260407	180041	306860	386966	314527	277137	236445	372417	334198
5.41	373032	488289	369207	297249	205171	511611	388754	306063	354578	461279	436448	484948	350495	625655	368771
5.39	456513	474408	351535	273855	245363	543283	377134	267379	383646	404539	488746	458912	401144	626837	356923
5.37	487097	516163	501641	500300	374161	640093	555999	451067	456031	605124	581014	670191	548935	792358	494117
5.35	512935	478115	377043	362634	311035	610531	572187	338464	489665	567361	490297	525468	462844	704823	520590
5.33	610680	584658	377894	369282	285856	615693	716611	322559	493421	519855	612711	556541	437287	608761	535217
5.31	754864	696605	467401	402303	377907	605214	797020	364763	521137	581944	675032	558622	463444	461615	563646
5.29	570227	613844	420706	429401	244447	461650	681535	247523	459941	565653	617622	444229	398338	371681	524203
5.27	469807	541731	384577	438214	201649	401061	650388	166593	419405	476685	556696	389955	370517	363810	506361
5.25	506027	660095	956038	696394	482132	523892	772155	393265	602400	942612	693177	685648	440600	398405	570886
5.23	1.11664e+06	1.90585e+06	1.333e+06	1.04188e+06	1.61203e+06	1.79195e+06	1.8786e+06	1.5019e+06	723035	2.34657e+06	1.21698e+06	2.44244e+06	1.5993e+06	2.50801e+06	958851
5.21	533741	800240	379394	392881	375316	621814	615963	359331	381011	698448	521574	605254	500959	694710	493401
5.19	498507	635826	353250	303948	403776	509483	604806	366473	322440	676189	365425	490684	362316	388178	424047
5.17	317137	375354	213822	234118	179062	330941	282901	180057	237543	368490	294218	210873	256148	356989	303473
5.15	251800	292469	181211	158547	62333.4	236723	221182	181595	133309	280864	187950	199828	199632	266972	295198
5.13	196127	281552	165609	114550	91057.5	245095	206331	141822	142089	351799	204475	206478	152281	284019	310012
5.11	210557	258554	137707	98068.7	92431	252543	129200	127311	162204	240679	114425	178954	148812	279510	238239
5.09	202324	261031	131191	126735	35177.9	237700	128480	85470.7	71702.5	245724	127181	94390.6	123552	221173	236504
5.07	178131	190674	56018.6	115540	8867.23	211604	88887.1	90873.2	126800	221940	89211.1	43915.5	104104	219160	184295
5.05	125354	219145	99559.7	120691	14832.7	184913	25235.8	-1326.82	141337	251465	174278	28718.4	87138.3	170575	215098
5.03	123925	227195	102055	110287	-54302.9	138313	-14646.9	-6861.21	32879.9	181802	125043	12403.6	28480	195516	166169
5.01	95112.5	157931	47385.9	59598.7	-42004.6	110642	-975.3	9675.73	51420.2	195381	109726	17803.1	68318.6	73553.4	119216
4.59	368602	512190	408055	376354	163510	465853	255836	239173	346610	494636	436908	271692	326149	394853	503874
4.57	474020	668270	510580	447067	277309	541988	366235	285219	451953	579992	520078	336596	426263	405776	593588
4.55	552091	716548	577814	540571	351099	628007	413220	381205	575709	664165	653648	421606	580492	523201	707507
4.53	561302	750443	679459	633912	399910	646373	443951	440780	695079	660859	755484	520920	560904	590226	843009
4.51	719874	875675	846097	827215	417202	780502	613486	595525	833431	800437	873483	574309	700362	717135	1.00744e+06
4.49	861642	1.06547e+06	1.04573e+06	1.0309e+06	709231	974477	793955	750533	1.00616e+06	992810	1.12172e+06	824948	871637	870039	1.21351e+06
4.47	1.0335e+06	1.15075e+06	1.14627e+06	1.10463e+06	781635	1.10836e+06	942650	901996	1.18467e+06	1.1698e+06	1.19166e+06	942872	1.02189e+06	922774	1.3015e+06
4.45	1.11683e+06	1.29282e+06	1.25929e+06	1.22618e+06	775196	1.2371e+06	929327	972720	1.29325e+06	1.22306e+06	1.40815e+06	1.0109e+06	1.09636e+06	983215	1.50203e+06
4.43	1.31404e+06	1.44119e+06	1.5113e+06	1.37998e+06	952664	1.37124e+06	1.17253e+06	1.08807e+06	1.55747e+06	1.36821e+06	1.58498e+06	1.1501e+06	1.23954e+06	1.15473e+06	1.6937e+06
4.41	1.50704e+06	1.70576e+06	1.7653e+06	1.64841e+06	1.18322e+06	1.66361e+06	1.33788e+06	1.3168e+06	1.80567e+06	1.6061e+06	1.83144e+06	1.38242e+06	1.5244e+06	1.3895e+06	2015229
4.39	1.56974e+06	1.79996e+06	1.82246e+06	1.72186e+06	1.2585e+06	1.71676e+06	1.4448e+06	1.33142e+06	1.93752e+06	1657488	2.00621e+06	1.48876e+06	1.6228e+06	1.44611e+06	2.10864e+06
4.37	1.80323e+06	1.95062e+06	2.19991e+06	2.06005e+06	1.40841e+06	1.87292e+06	1.61627e+06	1.56274e+06	2.25858e+06	1.78382e+06	2.2127e+06	1.63926e+06	1.77456e+06	1.63833e+06	2.38707e+06
4.35	2.27297e+06	2.34556e+06	2.66671e+06	2.62182e+06	1.85508e+06	2.47144e+06	2.07955e+06	2.26602e+06	2.77106e+06	2.31094e+06	2.75661e+06	2.17119e+06	2.16853e+06	2.06756e+06	2.91259e+06
4.33	2.35414e+06	2.50246e+06	2.87984e+06	2.80463e+06	1.863e+06	2.4584e+06	2.17883e+06	2.13607e+06	3.01891e+06	2.39071e+06	3.0734e+06	2.27443e+06	2.41033e+06	2.02156e+06	3.12182e+06
4.31	2.47262e+06	2.79083e+06	3.12518e+06	2.97926e+06	2.07975e+06	2.6286e+06	2.49332e+06	2241761	3.38853e+06	2.58772e+06	3.43169e+06	2.41707e+06	2.61466e+06	2.20173e+06	3.53565e+06
4.29	2.90559e+06	3.12342e+06	3.22317e+06	3.1635e+06	2.37342e+06	3.05657e+06	2.73265e+06	2.73494e+06	3.6578e+06	2.95456e+06	3.61517e+06	2.70558e+06	2.9472e+06	2.58725e+06	3.72666e+06
4.27	3.09277e+06	3.44495e+06	3.94706e+06	3.68551e+06	2.65026e+06	3.32176e+06	3.08001e+06	3.07083e+06	4.07317e+06	3.244e+06	4.10429e+06	3.04826e+06	3.26664e+06	2.869e+06	4.26695e+06
4.25	4.8923e+06	4.77706e+06	5.85521e+06	5.57601e+06	4.42259e+06	5.73036e+06	5.42931e+06	6.03674e+06	5.75783e+06	4.9352e+06	5.90008e+06	5.42318e+06	5.26215e+06	5734191	6.88782e+06
4.23	4.82919e+06	4.55289e+06	5.19678e+06	5.03114e+06	4298535	5.63234e+06	5.08199e+06	5.74868e+06	5.33425e+06	4.76094e+06	5.53931e+06	5.08388e+06	4.87185e+06	5.34332e+06	6.35529e+06
4.21	3.86113e+06	4.14033e+06	4.37242e+06	4.35276e+06	3.28983e+06	4.50043e+06	3.83371e+06	4.14938e+06	4.87276e+06	4.08639e+06	4.90079e+06	4.07728e+06	3.97102e+06	4.05911e+06	5.24427e+06
4.19	3.87925e+06	3.94448e+06	4.33059e+06	4.37852e+06	3.07322e+06	4.19183e+06	3.60592e+06	3.84003e+06	4.99295e+06	3.7292e+06	4.93796e+06	3.87378e+06	4.02625e+06	3.89957e+06	5.29457e+06
4.17	1.10287e+07	1.27086e+07	1.3883e+07	1.13645e+07	1.14046e+07	1.27871e+07	1.23934e+07	9.178e+06	1.17352e+07	1.00092e+07	1.19569e+07	1.10063e+07	9.78817e+06	7.45976e+06	1.34732e+07
4.15	1.22756e+07	1.26746e+07	1.29141e+07	1.1934e+07	1.22705e+07	1.35959e+07	1.21241e+07	9.13313e+06	1.12811e+07	1.00683e+07	1.16289e+07	1.11529e+07	1.00189e+07	7.21006e+06	1.35317e+07
4.13	9.13942e+06	9.3327e+06	1.02317e+07	8.22882e+06	8.81637e+06	1.19263e+07	1.11429e+07	1.29254e+07	1.02361e+07	9.19282e+06	1.01293e+07	1.01618e+07	9.2366e+06	1.21053e+07	1.09487e+07
4.11	7.24707e+06	6.98703e+06	7.12537e+06	6.32226e+06	6.3131e+06	8.58953e+06	7.58692e+06	8.92871e+06	7.54722e+06	6.92943e+06	7.49856e+06	6983399	6.67112e+06	9.00061e+06	8.06953e+06
4.09	6.27672e+06	7.27858e+06	7.53605e+06	6.95827e+06	5.84737e+06	7.18705e+06	7.01832e+06	6.7878e+06	7.87196e+06	6.93979e+06	7.95175e+06	7.15565e+06	6.67237e+06	7.46844e+06	8.60252e+06
4.07	8.18853e+06	8.95452e+06	9.3129e+06	8.00874e+06	7.90478e+06	9.29033e+06	8357160	9.51254e+06	1.01871e+07	8.44941e+06	9.58192e+06	8.53949e+06	8.30023e+06	8.9782e+06	9.94626e+06
4.05	1.96975e+07	2.13797e+07	1.95549e+07	1.71652e+07	2.06469e+07	2.28675e+07	1.90703e+07	2.50155e+07	2.08864e+07	2.03744e+07	2.05628e+07	2.0089e+07	1.97255e+07	2.27479e+07	2.18444e+07
4.03	8.05655e+06	9.08645e+06	8.08807e+06	7.50078e+06	7.68174e+06	9.16839e+06	8.81817e+06	9.79009e+06	8.45995e+06	8.79893e+06	8.86558e+06	8.79864e+06	8.61577e+06	1.03248e+07	9.72265e+06
4.01	9.15322e+06	1.09346e+07	8.17045e+06	7.71302e+06	9.82957e+06	1.09362e+07	1.10898e+07	1.25795e+07	8.04591e+06	1.10296e+07	8.47181e+06	1.05216e+07	9.95761e+06	1.28971e+07	9.4223e+06
3.99	2.22611e+07	1.99073e+07	2.61462e+07	2.54605e+07	2.28303e+07	2.29806e+07	2.32531e+07	2.73341e+07	2.56924e+07	2.00451e+07	2.20734e+07	2.50045e+07	2.52774e+07	2.51837e+07	2.90901e+07
3.97	2.2946e+07	2.08383e+07	2.59901e+07	2.67563e+07	2.17305e+07	2.46758e+07	2.39392e+07	2.86407e+07	3.00298e+07	2.00167e+07	2.3313e+07	2.44825e+07	3.25264e+07	2.75618e+07	3.2471e+07
3.95	1.77461e+07	1.64258e+07	1.97167e+07	1.68553e+07	1.49068e+07	1.96334e+07	1.96434e+07	2.3341e+07	2.50691e+07	1.48916e+07	1.95085e+07	1.89621e+07	2.78654e+07	2.45029e+07	2.51852e+07
3.93	1.51359e+07	1.30049e+07	1.36218e+07	1.20842e+07	1.31695e+07	1.7689e+07	1.76819e+07	2.08471e+07	1.66865e+07	1.5091e+07	1.42047e+07	1.79899e+07	2.07011e+07	2.23096e+07	1.79147e+07
3.91	8.85359e+06	8.66764e+06	7.59104e+06	6.61639e+06	7.72845e+06	9.69516e+06	9.68565e+06	1.00812e+07	7.58479e+06	9.24469e+06	8.05491e+06	1.00257e+07	8.73446e+06	1.21391e+07	8.65975e+06
3.89	1.35512e+07	1.72922e+07	1.05757e+07	8.09379e+06	1.46387e+07	1.78333e+07	1.78645e+07	1.81224e+07	9.42667e+06	1.71439e+07	1.22347e+07	2.09001e+07	1.69882e+07	2.61175e+07	1.30904e+07
3.87	1.35628e+07	1.66458e+07	1.24443e+07	1.06541e+07	1.47751e+07	1.69202e+07	1.74249e+07	1.66552e+07	1.21206e+07	1.64496e+07	1.38297e+07	1.97332e+07	1.64271e+07	2.23558e+07	1.50161e+07
3.85	1.59507e+07	2.03613e+07	1.84497e+07	1.75731e+07	1.87478e+07	1.98932e+07	2.18426e+07	1.9809e+07	1.93993e+07	2.01918e+07	1.99394e+07	2.37742e+07	1.98692e+07	2.26486e+07	2.1818e+07
3.83	2.77329e+07	3.56574e+07	2.50705e+07	2.21235e+07	3.05474e+07	3.40075e+07	3.56708e+07	3.57993e+07	2.97959e+07	3.30159e+07	2.94475e+07	4.02234e+07	3.86101e+07	4.63007e+07	3.36426e+07
3.81	2.64518e+07	2.85587e+07	2.0143e+07	1.8168e+07	2.65045e+07	2.83694e+07	2.53446e+07	2.99349e+07	2.16378e+07	2.79399e+07	2.25961e+07	2.83125e+07	2.57508e+07	3.183e+07	2.54014e+07
3.79	1.76274e+07	1.9529e+07	1.63584e+07	1.60903e+07	1.831e+07	1.96762e+07	1.93887e+07	1.86189e+07	1.77082e+07	1.95366e+07	1.94797e+07	20246825	1.70653e+07	1.79611e+07	2.0138e+07
3.77	4.78137e+07	4.65259e+07	4.86605e+07	5.15635e+07	5.24759e+07	6.00525e+07	5.96637e+07	6.97426e+07	5.419e+07	4.89706e+07	4.90186e+07	5.79345e+07	6.18437e+07	7.01214e+07	5.9942e+07
3.75	3.74775e+07	3.49005e+07	3.35219e+07	34638691	3.81728e+07	4.7213e+07	4.80518e+07	5.76069e+07	3.67486e+07	3.87346e+07	3.38756e+07	4.34228e+07	4.45594e+07	5.81301e+07	4.28409e+07
3.73	2.07242e+07	1.91857e+07	1.47566e+07	1.54084e+07	1.95502e+07	2.55005e+07	2.34984e+07	2.80251e+07	1.62686e+07	2.08051e+07	1.62392e+07	2.57775e+07	2.129e+07	3.54149e+07	1.86893e+07
3.71	1.76183e+07	2.18659e+07	1.0158e+07	8.93104e+06	1.87298e+07	2.3368e+07	2.21514e+07	2.33663e+07	1.01191e+07	2.1017e+07	1.39662e+07	2.72064e+07	2.15493e+07	3.72035e+07	1.39748e+07
3.69	1.20901e+07	1.46936e+07	1.0458e+07	9.79046e+06	1.30701e+07	1.42963e+07	1.46887e+07	1.37661e+07	1.07043e+07	1.39524e+07	1.2659e+07	1.60669e+07	1.33707e+07	1.76085e+07	1.26634e+07
3.67	1.92447e+07	2.23896e+07	2.05647e+07	2.11364e+07	2.24026e+07	2.43062e+07	2.49905e+07	2.63806e+07	2.16662e+07	2.22642e+07	2.26466e+07	2.506e+07	2.15525e+07	2.90938e+07	2.4014e+07
3.65	3.72108e+07	3.38213e+07	1.88723e+07	2.08298e+07	3.32799e+07	3.82986e+07	3.2128e+07	4.27237e+07	2.57945e+07	3.11428e+07	3.14923e+07	3.02629e+07	3.09738e+07	4.51759e+07	3.2526e+07
3.63	3.99407e+07	3.37993e+07	1.62355e+07	1.90606e+07	3.3851e+07	3.83302e+07	3.13593e+07	4.2582e+07	2.60366e+07	3.03348e+07	3.24034e+07	2.90108e+07	3.03932e+07	4.34309e+07	3.34366e+07
3.61	1.83196e+07	1.97642e+07	1.93062e+07	1.93204e+07	2.03297e+07	2.23249e+07	2.23796e+07	2.27929e+07	1.93158e+07	1.91198e+07	2.03169e+07	2.23997e+07	1.88219e+07	2.24133e+07	2.13691e+07
3.59	4.48789e+07	5.01536e+07	5.19631e+07	4.54458e+07	5.0833e+07	5.3491e+07	5.20354e+07	3.90303e+07	3.98939e+07	3.95971e+07	4.38048e+07	4.68238e+07	3.88463e+07	3.24986e+07	5.00644e+07
3.57	2.31942e+07	1.95924e+07	1.38617e+07	1.52763e+07	2.11068e+07	2.44219e+07	2.13771e+07	2.62555e+07	1.7246e+07	1.88186e+07	2.01827e+07	2.01116e+07	1.9199e+07	2.60824e+07	2.32211e+07
3.55	5.7534e+07	3.80712e+07	3.33405e+07	36458104	4.38e+07	5.46865e+07	4.25023e+07	6.82932e+07	6.05101e+07	3.68682e+07	4.78878e+07	3.70475e+07	5.63519e+07	8.89464e+07	5.90339e+07
3.53	2.80101e+07	2.67959e+07	1.49912e+07	1.45697e+07	2.57162e+07	2.97021e+07	2.50497e+07	3.24079e+07	2.05962e+07	2.46836e+07	2.30317e+07	2.53967e+07	2.55186e+07	3.61707e+07	2.50969e+07
3.51	3.05899e+07	3.36044e+07	2.69924e+07	2.26114e+07	3.35543e+07	3.54081e+07	2.88021e+07	3.94851e+07	2.8209e+07	3.18827e+07	2.8668e+07	3.10005e+07	3.0119e+07	3.75988e+07	2.99232e+07
3.49	9.17966e+06	1.1188e+07	5.18864e+06	4.49027e+06	9.91958e+06	1.20229e+07	1.24259e+07	1.22055e+07	5.20434e+06	1.16075e+07	6.95353e+06	1.47176e+07	1.08699e+07	1.78689e+07	7.19221e+06
3.47	1.03798e+07	1.49669e+07	5.00263e+06	4.04483e+06	1.26155e+07	1.46667e+07	1.52828e+07	1.47084e+07	4.69908e+06	1.48705e+07	7.72776e+06	1.8933e+07	1.41483e+07	2.44001e+07	7.35403e+06
3.45	1.01943e+07	1.47443e+07	4.96765e+06	3.74769e+06	1.25228e+07	1.46359e+07	1.51832e+07	1.44837e+07	4.80825e+06	1.47538e+07	7.69978e+06	1.85991e+07	1.40308e+07	2.38245e+07	7.36744e+06
3.43	6.78914e+06	6.95119e+06	7.59936e+06	5.96387e+06	6.88574e+06	8.77112e+06	8.76094e+06	9.19163e+06	6.92588e+06	7.13031e+06	7.06324e+06	8.52355e+06	7.24227e+06	1.01568e+07	7.37869e+06
3.41	1.91759e+07	2.2402e+07	1.82883e+07	1.26887e+07	2.10676e+07	2.91834e+07	2.84708e+07	3.21465e+07	1.65612e+07	2.14646e+07	1.84261e+07	2.93496e+07	2.36013e+07	3.84369e+07	1.87017e+07
3.39	1.30859e+07	1.56679e+07	9.027e+06	6.82577e+06	1.39374e+07	1.86935e+07	1.75722e+07	1.95094e+07	8.45775e+06	1.49055e+07	1.04774e+07	2.01614e+07	1.59486e+07	2.66958e+07	1.09144e+07
3.37	4.71965e+06	5.07395e+06	3.47594e+06	3.16036e+06	4.4741e+06	5.71277e+06	5.21166e+06	5.5603e+06	3.33577e+06	4.89285e+06	3.74338e+06	5.73489e+06	4.96349e+06	7.29718e+06	4.29175e+06
3.35	6.04561e+06	5.8752e+06	7.04018e+06	5.47529e+06	5.9617e+06	7.9702e+06	7.50931e+06	8.95911e+06	6.57453e+06	5.77106e+06	6.18718e+06	6.7741e+06	6.10844e+06	8.13425e+06	6.825e+06
3.33	1.68445e+07	1.49917e+07	1.91526e+07	1.39021e+07	1.6154e+07	2.37099e+07	2.21487e+07	2.72545e+07	1.78739e+07	1.51004e+07	1.65037e+07	1.95432e+07	17208297	2.4075e+07	1.8052e+07
3.31	1.05159e+07	9.36672e+06	1.18e+07	9.75778e+06	9.79609e+06	1.31215e+07	1.19784e+07	1.36315e+07	1.08579e+07	9.29687e+06	9.89844e+06	1.11782e+07	1.02181e+07	1.29458e+07	1.14864e+07
3.29	9.96252e+06	8.52238e+06	9.96805e+06	9.70343e+06	8.84031e+06	1.17746e+07	1.0748e+07	1.34487e+07	1.03283e+07	9.7229e+06	8.92206e+06	1.10176e+07	9.5981e+06	1.31773e+07	1.09715e+07
3.27	1.8383e+07	1.57773e+07	2.06485e+07	1.9295e+07	1.95453e+07	1.97954e+07	1.84771e+07	2.25775e+07	1.67584e+07	1.62352e+07	1.62034e+07	1.93096e+07	1.6506e+07	1.98008e+07	2.1099e+07
3.25	3.14988e+07	3.24555e+07	3.81791e+07	3.54618e+07	3.6741e+07	3.67377e+07	3.58188e+07	3.91284e+07	3.36669e+07	2.96425e+07	3.03027e+07	3.7415e+07	3.57461e+07	3.894e+07	3.68004e+07
3.23	5.73025e+07	6.41723e+07	6.38624e+07	6.27741e+07	6.2814e+07	7.46375e+07	7.27298e+07	7.23016e+07	7.06187e+07	5.61118e+07	5.66652e+07	7.33452e+07	7.53438e+07	7.90747e+07	6.37762e+07
3.21	1.8771e+08	2.14819e+08	2.259e+08	1.92344e+08	2.13931e+08	2.17261e+08	2.09442e+08	1.30212e+08	1.62684e+08	1.57713e+08	1.71708e+08	1.81763e+08	1.45826e+08	8.75077e+07	2.0243e+08
3.19	1.79545e+08	195130017	173311585	1.41662e+08	2.02067e+08	2.09181e+08	1.69587e+08	2.36854e+08	1.75719e+08	1.85825e+08	1.76627e+08	1.78018e+08	1.72112e+08	1.99191e+08	1.84319e+08
3.17	2.04032e+07	1.34185e+07	2.06274e+07	1.98291e+07	2.13364e+07	1.92245e+07	2.13407e+07	2.39876e+07	1.81863e+07	1.99178e+07	1.63997e+07	2.09639e+07	1.696e+07	1.87825e+07	2.12513e+07
3.15	1.18666e+07	9.46009e+06	1.32831e+07	1.22462e+07	1.26003e+07	1.11079e+07	1.26392e+07	1.40017e+07	1.17511e+07	1.11945e+07	1.12368e+07	1.2203e+07	1.01968e+07	1.15675e+07	1.37054e+07
3.13	2.44211e+07	2.21925e+07	2.25593e+07	2.10164e+07	2.38505e+07	2.64586e+07	2.41289e+07	3.26547e+07	2.55015e+07	2.44855e+07	2.18841e+07	2.56456e+07	2.23724e+07	2.91741e+07	2.75846e+07
3.11	1.41553e+07	1.14313e+07	1.39642e+07	1.34268e+07	1.36595e+07	1.54465e+07	1.40816e+07	1.84464e+07	1.48255e+07	1.26783e+07	1.29697e+07	1.43026e+07	1.31434e+07	1.62514e+07	1.54537e+07
3.09	8.97771e+06	8.35071e+06	9.39215e+06	8.70403e+06	8.9107e+06	1.01304e+07	9.0028e+06	1.10978e+07	9.98784e+06	8.355e+06	9.27285e+06	8.7328e+06	8.23928e+06	9.4979e+06	9.75075e+06
3.07	8.53896e+06	7.68378e+06	8.39827e+06	7.68818e+06	8.86527e+06	1.01774e+07	1.14762e+07	1.16367e+07	8.47484e+06	9.97126e+06	8.39587e+06	1.07848e+07	8.6078e+06	1.08979e+07	9.0848e+06
3.05	3.78021e+07	4.19108e+07	4.45661e+07	3.85177e+07	4.57867e+07	4.84108e+07	5.19001e+07	5.16189e+07	4.25845e+07	4.34004e+07	4.11853e+07	4.6632e+07	4.15964e+07	4.76087e+07	4.33761e+07
3.03	5.86317e+07	5.99897e+07	6.46514e+07	5.85271e+07	7.01106e+07	7.22804e+07	7.79687e+07	8.31817e+07	6.66571e+07	5.9827e+07	5.82248e+07	6.53079e+07	6.51357e+07	6.86912e+07	6.8648e+07
3.01	4.21197e+07	3.08035e+07	4.46004e+07	4.45038e+07	3.87551e+07	5.31015e+07	5.80915e+07	7.16167e+07	4.86086e+07	3.99938e+07	3.94166e+07	4.48562e+07	4.47635e+07	5.30843e+07	5.41779e+07
2.99	1.63524e+07	1.3605e+07	1.87225e+07	1.65171e+07	1.46103e+07	1.58586e+07	1.70192e+07	1.63301e+07	1.87603e+07	1.35742e+07	1.63481e+07	1.63682e+07	1.5318e+07	1.38647e+07	1.94701e+07
2.97	7.78825e+06	7.14109e+06	9.48301e+06	8.35552e+06	7.15282e+06	6.81817e+06	8.22403e+06	6.83797e+06	9.09329e+06	6.59946e+06	8.29996e+06	7.83089e+06	7.10321e+06	5.45203e+06	8.58312e+06
2.95	6.1323e+06	5.24706e+06	7.1815e+06	7.46888e+06	5.92539e+06	5.12892e+06	6.88445e+06	5.49259e+06	7.11554e+06	5.19156e+06	6.14259e+06	6.45659e+06	5.66585e+06	4.0513e+06	6.10556e+06
2.93	6.23182e+06	5.07875e+06	7.64124e+06	8.8204e+06	6.37164e+06	5.26788e+06	7.38717e+06	6.02664e+06	7.70845e+06	5.45003e+06	6.10431e+06	7.14212e+06	6.04529e+06	4.19152e+06	6.29101e+06
2.91	4.15778e+06	3.62998e+06	4.27191e+06	3.79673e+06	3.81987e+06	3.83305e+06	4.56796e+06	3.90416e+06	4.34326e+06	3.48849e+06	4.32929e+06	4.27135e+06	3.73959e+06	3.37131e+06	4.63358e+06
2.89	3.6947e+06	3.32682e+06	3.90121e+06	3.49053e+06	3.29298e+06	3.46126e+06	4.24022e+06	3.45622e+06	4.18488e+06	3.24953e+06	3.87272e+06	3.92839e+06	3.44427e+06	2.9434e+06	4.14311e+06
2.87	5.46691e+06	4.26449e+06	6.21537e+06	7.53622e+06	5.46478e+06	4.98831e+06	7.38814e+06	5.75328e+06	6.61007e+06	5.46397e+06	4.96699e+06	6.9468e+06	5.43121e+06	4.09134e+06	5.11495e+06
2.85	4976334	3.96684e+06	5.19593e+06	5.73321e+06	4.68291e+06	4.76654e+06	6.69584e+06	5.48119e+06	5.51502e+06	5.14455e+06	4.55786e+06	6.28765e+06	4.7645e+06	4.20548e+06	4.81018e+06
2.83	3.83759e+06	3.07483e+06	3.72694e+06	3.95177e+06	3.41342e+06	3.58185e+06	4.17632e+06	3.65374e+06	3.90252e+06	3.15146e+06	3.56358e+06	3.92992e+06	3.41266e+06	2.93037e+06	3.79613e+06
2.81	4.69551e+06	3.04671e+06	3.47303e+06	3.27008e+06	3.37697e+06	4.26259e+06	4.18331e+06	4.07124e+06	3.71794e+06	3.31686e+06	3.6089e+06	3.82953e+06	3.291e+06	4.45416e+06	3.86354e+06
2.79	4.80221e+06	3.00122e+06	3.28067e+06	3.11337e+06	3.25887e+06	4.21164e+06	4.2149e+06	4.02251e+06	3.64245e+06	3.20319e+06	3.59941e+06	3.66903e+06	3.25108e+06	4.61579e+06	3.80762e+06
2.77	3.74238e+06	3.07652e+06	3.44509e+06	3.09526e+06	2.9681e+06	3.26297e+06	3.93981e+06	3.17973e+06	3.71799e+06	2.94368e+06	3.64066e+06	3.44218e+06	2.94253e+06	2.87055e+06	3.66038e+06
2.75	7.30248e+06	8.24512e+06	1.36414e+07	9.49484e+06	7.71834e+06	9.38026e+06	9.98792e+06	5.43997e+06	8.41988e+06	9604104	1.12851e+07	1.00245e+07	9172629	5.99073e+06	1.45002e+07
2.73	4.5611e+06	4.06594e+06	5.52902e+06	4.6182e+06	3.66251e+06	3.98968e+06	5.0129e+06	3.89124e+06	5.01163e+06	4.02765e+06	5.27048e+06	4.58563e+06	3.95929e+06	3.75534e+06	6.04216e+06
2.71	4.48556e+06	3.92628e+06	4.95466e+06	4.28691e+06	3.5038e+06	3.75783e+06	5.18056e+06	4.05965e+06	5.11851e+06	4.04423e+06	4.76271e+06	4.74453e+06	3.71166e+06	3.74377e+06	5.91624e+06
2.69	4.46516e+06	3.62802e+06	4.20244e+06	3.77294e+06	3.40372e+06	3.91794e+06	4.78783e+06	4.0617e+06	4.32435e+06	3.66781e+06	4.07798e+06	4.21926e+06	3.57064e+06	4.08621e+06	4.64064e+06
2.67	4.15888e+06	3.06583e+06	3.62741e+06	3.31109e+06	2.98807e+06	3.47285e+06	4.01605e+06	3.49565e+06	3.6937e+06	3.0326e+06	3.5282e+06	3.54175e+06	3.16169e+06	3.59296e+06	3.77986e+06
2.65	6.26541e+06	4.10209e+06	5.51196e+06	5.32406e+06	4.55234e+06	5.99671e+06	5.58521e+06	6.68337e+06	5.43012e+06	4.39811e+06	4.86668e+06	5.12708e+06	4.64798e+06	7.16976e+06	5.79822e+06
2.63	6.25114e+06	5.62434e+06	8.70969e+06	8.64086e+06	6.19442e+06	7.13596e+06	6.99788e+06	8.57024e+06	7.88264e+06	5.61928e+06	6.72588e+06	7.00734e+06	6.15724e+06	8.5405e+06	8.47371e+06
2.61	3.79221e+06	3.19872e+06	4.00693e+06	3.83335e+06	3.34965e+06	3.81173e+06	3.7754e+06	4.08678e+06	3.92294e+06	3.15468e+06	3.49653e+06	3.65759e+06	3.40208e+06	3.58472e+06	4.25297e+06
2.59	2.80754e+06	2.6287e+06	3.05365e+06	2.88866e+06	2.63825e+06	2.79366e+06	3.05132e+06	2.8973e+06	3.1429e+06	2.62456e+06	2.92341e+06	2.83569e+06	2719941	2.46904e+06	3.28454e+06
2.57	2.88364e+06	2.57943e+06	3.24534e+06	2.85624e+06	2.67155e+06	2.94063e+06	3.24937e+06	3.05256e+06	3.47188e+06	2.68322e+06	3.13982e+06	2.98581e+06	2.87318e+06	2.58547e+06	3.40425e+06
2.55	3.48089e+06	3.11896e+06	5.15975e+06	4.18927e+06	3.81239e+06	3.92895e+06	5.68886e+06	4.78243e+06	6.11422e+06	5.98068e+06	4.89555e+06	3.98552e+06	4.52858e+06	4.17044e+06	5.13152e+06
2.53	3.3043e+06	2.85215e+06	4.20075e+06	3.63124e+06	3.35658e+06	3.74823e+06	4.32839e+06	4.00901e+06	4.65422e+06	3.95892e+06	3.95035e+06	3.63271e+06	3.87189e+06	3.41408e+06	4.56541e+06
2.51	3.54158e+06	3.15377e+06	3.70779e+06	3.53988e+06	3.51042e+06	4.04895e+06	4.02586e+06	4.5503e+06	3.95504e+06	3.51115e+06	3.56736e+06	3.58412e+06	4.08954e+06	4.16631e+06	4.48142e+06
2.49	4.36844e+06	3.53642e+06	5.04516e+06	5.19753e+06	5.24203e+06	5.80862e+06	5.40282e+06	6.69702e+06	5.5996e+06	4.39975e+06	4.64685e+06	4.96876e+06	5.8954e+06	5.65174e+06	6.91841e+06
2.47	7.10091e+06	4551114	1.12986e+07	1.28873e+07	9.74452e+06	1.04276e+07	1.13906e+07	1.49694e+07	1.15061e+07	7.8695e+06	8.68626e+06	8.95711e+06	1.36622e+07	1.0541e+07	1.48917e+07
2.45	1.18289e+07	6.83872e+06	2.04457e+07	2.3872e+07	1.64033e+07	1.72772e+07	2.02639e+07	2.72317e+07	1.96491e+07	1.32989e+07	1.42933e+07	1.47728e+07	2.49711e+07	1.82752e+07	2.59117e+07
2.43	1.39068e+07	9.14506e+06	2.48824e+07	2.78296e+07	1.90688e+07	1.94043e+07	2.3185e+07	2.98199e+07	2.22188e+07	1.54897e+07	1.69212e+07	1.73964e+07	2.85194e+07	2.04578e+07	2.98369e+07
2.41	7.8197e+06	6.17875e+06	1.01349e+07	1.07007e+07	8.55671e+06	9.28012e+06	1.03225e+07	1.26226e+07	9.44296e+06	8.10177e+06	7.87329e+06	8.26451e+06	1.14117e+07	9.76911e+06	1.19125e+07
2.39	1.43189e+07	1.17791e+07	9.7385e+06	9.55354e+06	1.40913e+07	1.31876e+07	1.29904e+07	2.01521e+07	9.47413e+06	1.34761e+07	7.91376e+06	1.16632e+07	1.58325e+07	2.29703e+07	1.04484e+07
2.37	9.43414e+06	8.32545e+06	8.29171e+06	7.42942e+06	9.16967e+06	1.14109e+07	1.11426e+07	1.22931e+07	8.80257e+06	9.79138e+06	7.90973e+06	9.76795e+06	9.74238e+06	1.09097e+07	9.46385e+06
2.35	3.28241e+07	2.60864e+07	2.46764e+07	2.26803e+07	3.29441e+07	4.35349e+07	4.18442e+07	4.82059e+07	3.01161e+07	3.35087e+07	2.44163e+07	35643161	3.65264e+07	4.33086e+07	3.26215e+07
2.33	3.88781e+07	3.27247e+07	3.45288e+07	3.16799e+07	4.18227e+07	5.0572e+07	5.46869e+07	5.54927e+07	3.81114e+07	3.99354e+07	3.39187e+07	4.67986e+07	4.67994e+07	4.75271e+07	4.53994e+07
2.31	1.30121e+07	1.13769e+07	1.40942e+07	1.17217e+07	1.29064e+07	1.57802e+07	1.57368e+07	1.45237e+07	1.27367e+07	1.30663e+07	1.28361e+07	1.44954e+07	1.40567e+07	1.27299e+07	1.65089e+07
2.29	1.07833e+07	1.00678e+07	1.00117e+07	9.26347e+06	1.09571e+07	1.27196e+07	1.25368e+07	1.32091e+07	9.63625e+06	1.07094e+07	9.53313e+06	1.08982e+07	1.02446e+07	1.17107e+07	1.06398e+07
2.27	1.40411e+07	1.30317e+07	1.15833e+07	1.15701e+07	1.46651e+07	1.68498e+07	1.66095e+07	1.87234e+07	1.16595e+07	1.37443e+07	1.12399e+07	1.39882e+07	1.34084e+07	1.695e+07	1.22553e+07
2.25	1.13258e+07	1.05747e+07	8.89036e+06	8.75907e+06	1.13987e+07	1.2957e+07	1.36808e+07	1.39305e+07	9.2677e+06	1.09786e+07	9.0161e+06	1.12211e+07	1.07323e+07	1.22933e+07	9.7853e+06
2.23	8.74279e+06	9.18313e+06	7.07785e+06	6.30819e+06	9.41276e+06	1.00429e+07	1.1629e+07	1.06946e+07	7.18144e+06	9.60195e+06	7.30104e+06	9.54106e+06	9.14673e+06	9.18762e+06	7.88556e+06
2.21	6.40662e+06	6.42773e+06	6132859	5.47917e+06	6.53065e+06	7.02395e+06	7.78759e+06	7.52573e+06	5.97088e+06	6.48847e+06	5.75896e+06	6.80202e+06	6.44117e+06	6.68946e+06	6.63269e+06
2.19	5.4494e+06	4.8566e+06	5.99866e+06	5.61618e+06	5.07747e+06	5.88895e+06	5.87492e+06	6.15091e+06	5.98596e+06	4.78739e+06	5.36889e+06	5.65238e+06	5.18928e+06	5.64908e+06	6.63349e+06
2.17	5.90922e+06	4.89517e+06	7.55387e+06	6.90313e+06	5.80941e+06	6.65103e+06	6.70239e+06	7.08079e+06	7.5446e+06	5.23629e+06	6.52433e+06	6.26351e+06	6.44212e+06	6.1453e+06	8.4917e+06
2.15	1.06799e+07	7.31741e+06	1.69472e+07	1.77971e+07	1.33278e+07	1.47211e+07	1.57867e+07	1.97073e+07	1.69199e+07	1.0922e+07	1.30981e+07	1.2922e+07	1.77112e+07	14492387	2.04021e+07
2.13	3.11763e+07	2.08169e+07	4.35813e+07	5.04524e+07	3.86299e+07	4.37146e+07	4.477e+07	6.10042e+07	4.36924e+07	3.23487e+07	3.23559e+07	3.67736e+07	5.11613e+07	4.81599e+07	5.4698e+07
2.11	2.56212e+07	1.6993e+07	2.07619e+07	2.39246e+07	2.58178e+07	3.19832e+07	2.94709e+07	3.73898e+07	2.48862e+07	24035359	1.88051e+07	2.52842e+07	3.0775e+07	3.154e+07	2.95787e+07
2.09	1.3551e+07	1.06018e+07	1.20014e+07	1.15042e+07	1.27008e+07	1.5427e+07	1.55655e+07	1.63532e+07	1.35222e+07	1.22986e+07	1.15087e+07	1.3708e+07	13744613	1.38536e+07	1.44107e+07
2.07	1.70213e+07	1.4046e+07	1.65723e+07	1.38691e+07	1.55638e+07	2.05485e+07	1.97014e+07	2.19898e+07	1.73563e+07	1.50222e+07	1.50271e+07	1.76244e+07	1.63472e+07	1.98026e+07	1.68246e+07
2.05	3.16493e+07	2.6089e+07	2.27587e+07	2.07987e+07	3.18039e+07	3.92923e+07	3.92804e+07	4.1972e+07	2.63407e+07	3.304e+07	2.2713e+07	3.3574e+07	3.11687e+07	3.61708e+07	2.74164e+07
2.03	2.16631e+07	1.76037e+07	1.78415e+07	1.62569e+07	1.97386e+07	2.48691e+07	2.49704e+07	2.6475e+07	1.96588e+07	2.00346e+07	1.74265e+07	2.13784e+07	2.09975e+07	2.33964e+07	2.02207e+07
2.01	1.98759e+07	1.83946e+07	2.10013e+07	1.67656e+07	1.88341e+07	2.44676e+07	2.56655e+07	2.72467e+07	2.03783e+07	1.83266e+07	1.95076e+07	2.16751e+07	1.97117e+07	2.41581e+07	2.01748e+07
1.99	2.00614e+07	1.90073e+07	2.05811e+07	1.67296e+07	2.00342e+07	2.58815e+07	2.63647e+07	2.92394e+07	2.00884e+07	1.92594e+07	1.92914e+07	2.24418e+07	2.02036e+07	2.64651e+07	2.0188e+07
1.97	1.64494e+07	1.47803e+07	1.573e+07	1.46663e+07	1.58891e+07	1.98728e+07	1.997e+07	2.18592e+07	1.56228e+07	1.53503e+07	1.51583e+07	1.75694e+07	1.59966e+07	2.08682e+07	1.64031e+07
1.95	1.45526e+07	1.25847e+07	1.40642e+07	1.44923e+07	1.26816e+07	1.6124e+07	1.51294e+07	1.56454e+07	1.3958e+07	1.28522e+07	1.40737e+07	1.46345e+07	1.36088e+07	1.56883e+07	1.44941e+07
1.93	2.32765e+07	2.18993e+07	2.48812e+07	2.54954e+07	2.28091e+07	2.85022e+07	2.7554e+07	2.98295e+07	2.74013e+07	2.126e+07	2.2911e+07	2.61578e+07	2.65231e+07	2.80168e+07	2.56719e+07
1.91	3.95869e+07	3.69831e+07	4.41515e+07	4.57813e+07	4.10614e+07	5.17814e+07	5.19747e+07	5.89714e+07	5.08266e+07	3.80429e+07	3.90233e+07	4.65679e+07	4.95942e+07	5.36473e+07	4.73898e+07
1.89	2.26151e+07	1.77794e+07	2.19746e+07	2.29461e+07	2.09154e+07	2.77988e+07	2.82595e+07	3.42112e+07	2.5147e+07	2.00511e+07	2.00221e+07	2.35184e+07	2.45413e+07	2.75891e+07	2.59079e+07
1.87	9.85285e+06	8.08514e+06	9.61265e+06	9.54376e+06	8.9421e+06	1.10394e+07	1.17513e+07	1.29993e+07	1.05144e+07	8.84455e+06	9.1258e+06	9.89924e+06	9.8118e+06	1.0297e+07	1.09771e+07
1.85	8.18751e+06	7.87229e+06	7.50373e+06	7.13553e+06	8.0677e+06	9.12889e+06	9.49287e+06	9.75637e+06	7.74161e+06	8.3341e+06	7.65236e+06	8.36969e+06	7.87744e+06	8.7884e+06	8.22336e+06
1.83	9.64258e+06	9.96041e+06	8.27175e+06	7.94682e+06	1.01839e+07	1.14201e+07	1.14226e+07	1.18215e+07	8.4431e+06	1.06142e+07	8.90082e+06	10335412	9.67758e+06	1.09826e+07	9.19802e+06
1.81	8.7873e+06	9.06871e+06	8.01197e+06	7.57262e+06	9.18292e+06	1.01994e+07	1.02497e+07	1.08315e+07	8.38509e+06	9.23602e+06	8.36788e+06	9.2809e+06	8.84878e+06	9.72031e+06	8.892e+06
1.79	8.14257e+06	8.90881e+06	9.0127e+06	7.94729e+06	8.85723e+06	9.03132e+06	1.00537e+07	9.6815e+06	9.28995e+06	8.325e+06	8.78292e+06	8.83465e+06	8.42112e+06	8.28036e+06	9.29466e+06
1.77	3.00887e+07	3.65578e+07	3.7465e+07	3.09361e+07	3.98844e+07	3.72914e+07	4.16527e+07	41533203	3.83491e+07	3.16037e+07	3.31053e+07	3.46866e+07	3.46796e+07	3.38873e+07	3.58624e+07
1.75	2.53132e+07	2.43484e+07	26488701	2.5084e+07	2.78179e+07	2.95203e+07	3.04387e+07	3.26069e+07	2.83369e+07	2.33891e+07	2.41728e+07	2.67717e+07	2.66268e+07	2.9027e+07	2.78996e+07
1.73	3.25627e+07	2.55199e+07	3.3301e+07	3.46919e+07	3.0596e+07	4.14464e+07	4.05791e+07	5.08979e+07	3.78733e+07	2.91619e+07	2.98313e+07	3.55762e+07	3.50586e+07	4.40884e+07	3.77456e+07
1.71	3.19855e+07	2.38944e+07	3.0934e+07	3.33813e+07	2.94825e+07	3.92425e+07	3.74823e+07	4.74196e+07	3.58847e+07	2.70548e+07	2.78979e+07	3.36872e+07	3.38408e+07	4.21679e+07	3.58836e+07
1.69	2.03837e+07	1.45291e+07	1.93023e+07	2.06583e+07	1.81342e+07	2.30811e+07	2.12525e+07	2.66385e+07	2.21752e+07	1.6182e+07	1.75943e+07	2.07265e+07	1.92575e+07	2.55608e+07	2.15706e+07
1.67	1.44559e+07	1.16577e+07	1.445e+07	1.48124e+07	1.34719e+07	1.60593e+07	1.52102e+07	1.73612e+07	1.62112e+07	1.17135e+07	1.31799e+07	1.49953e+07	1.42325e+07	1.68381e+07	1.51377e+07
1.65	1.3667e+07	1.31716e+07	1.47463e+07	1.45087e+07	1.38689e+07	1.60768e+07	1.61065e+07	1.62856e+07	1.6803e+07	1.18966e+07	1.32703e+07	1.55357e+07	1.581e+07	1.55236e+07	1.48928e+07
1.63	1.13632e+07	1.06953e+07	1.19193e+07	1.17422e+07	1.13515e+07	1.31825e+07	1.31941e+07	1.32243e+07	1.36855e+07	9.75572e+06	1.09503e+07	1.26475e+07	1.29043e+07	1.23593e+07	1.22513e+07
1.61	6.6928e+06	5.79936e+06	6.78302e+06	6.39675e+06	6.18264e+06	6.87961e+06	7.23102e+06	6.48756e+06	7.62104e+06	5.37854e+06	6.51519e+06	6.77342e+06	6.4434e+06	5.8163e+06	6.99184e+06
1.59	5.61443e+06	4.69229e+06	5.34334e+06	4.88613e+06	4.73263e+06	5.23462e+06	6.14155e+06	4.69292e+06	6.00373e+06	4.36998e+06	5.42489e+06	5.28651e+06	4.6843e+06	4.09352e+06	5.59641e+06
1.57	5.1546e+06	4.35003e+06	4.75338e+06	4.37697e+06	4.29802e+06	4.64596e+06	5.60623e+06	4.14751e+06	5.11514e+06	4.03839e+06	4.85583e+06	4.73992e+06	4.12965e+06	3.6348e+06	5.03761e+06
1.55	4.73853e+06	4.10616e+06	4.70151e+06	4.24472e+06	4.11174e+06	4.47029e+06	5.26126e+06	4.31798e+06	4.93176e+06	3.95945e+06	4.64145e+06	4.58286e+06	3.96683e+06	3.74953e+06	4.94067e+06
1.53	6.44272e+06	5.28296e+06	6.44901e+06	6.00916e+06	5.56253e+06	6.92566e+06	7.71559e+06	7.88819e+06	6.95587e+06	5.63658e+06	6.1866e+06	6.37589e+06	5.92513e+06	6.28402e+06	7234477
1.51	1.00261e+07	7.68472e+06	9.94151e+06	9.73084e+06	8.76501e+06	1.18738e+07	1.28075e+07	1.52754e+07	1.08228e+07	9.05024e+06	9.25163e+06	1.00227e+07	9.84112e+06	1.15953e+07	1.1708e+07
1.49	1.05595e+07	8.01533e+06	1.03548e+07	1.02284e+07	9.15079e+06	1.23296e+07	1.28453e+07	1.53352e+07	1.12709e+07	9.2241e+06	9.52927e+06	1.02276e+07	1.00917e+07	1.23011e+07	1.19506e+07
1.47	3.18962e+07	1.10409e+07	1.40465e+07	1.38166e+07	1.91086e+07	2.80426e+07	1.70135e+07	3.84851e+07	1.73209e+07	1.64033e+07	1.23106e+07	1.59994e+07	1.54179e+07	3.62987e+07	1.50306e+07
1.45	1.91733e+07	1.14291e+07	1.3988e+07	1.38555e+07	1.50421e+07	2.14985e+07	1.78755e+07	2.58692e+07	1.64946e+07	1.45567e+07	1.26802e+07	1.50691e+07	1.48597e+07	2.11754e+07	1.60741e+07
1.43	1.36438e+07	9.49319e+06	1.21519e+07	1.18117e+07	1.10735e+07	1.5688e+07	1.48439e+07	1.79765e+07	1.41717e+07	1.10158e+07	1.1331e+07	1.23181e+07	1.19693e+07	1.39028e+07	1.42159e+07
1.41	1.01379e+07	7.7395e+06	9.4207e+06	8.35779e+06	7.82061e+06	1.06655e+07	9.77792e+06	1.01505e+07	1.06695e+07	7.68436e+06	9.09657e+06	8.57338e+06	8.12024e+06	8.09422e+06	9.8889e+06
1.39	8.78176e+06	7.0472e+06	8.34082e+06	7.08526e+06	6.40754e+06	8.8315e+06	7.70547e+06	6.57101e+06	9.266e+06	6.45305e+06	8.02613e+06	6.88242e+06	6.31079e+06	5.51442e+06	7.82022e+06
1.37	8.45036e+06	6.40303e+06	7.47999e+06	6.24008e+06	5.81559e+06	8.62892e+06	7.298e+06	5.81041e+06	8.69173e+06	5.94903e+06	7.21913e+06	6.45888e+06	5.66147e+06	5.03805e+06	7.06185e+06
1.35	9.10372e+06	6.39261e+06	7.28412e+06	6.20021e+06	5.78103e+06	9.38065e+06	8.12512e+06	5.99077e+06	9.20703e+06	5.93853e+06	7.4129e+06	7.02745e+06	5.79275e+06	5.48379e+06	7.48071e+06
1.33	2.72487e+07	2.07263e+07	2.55536e+07	2.18021e+07	2.39508e+07	3.40917e+07	3.04825e+07	3.67875e+07	2.47527e+07	2.43439e+07	2.4547e+07	2.81666e+07	2.41398e+07	3.61895e+07	2.94154e+07
1.31	3.29597e+07	2.34934e+07	2.69875e+07	2.39332e+07	2.68521e+07	3.81299e+07	3.47877e+07	3.9138e+07	2.67124e+07	2.735e+07	2.67742e+07	3.10789e+07	2.66838e+07	3.8977e+07	3.22201e+07
1.29	1.83244e+07	1.41649e+07	1.6433e+07	1.20041e+07	1.14208e+07	1.60807e+07	1.8794e+07	9.35349e+06	1.60398e+07	1.21015e+07	1.5268e+07	1.44703e+07	1.10525e+07	8.57085e+06	1.41849e+07
1.27	1.81941e+07	1.5697e+07	1.67041e+07	1.48229e+07	1.1908e+07	1.49113e+07	2.04582e+07	1.07132e+07	1.7608e+07	1.31401e+07	1.89599e+07	1.61542e+07	1.21791e+07	1.06669e+07	1.75395e+07
1.25	1.69427e+07	1.65579e+07	1.77739e+07	1.54788e+07	1.14177e+07	1.28488e+07	1.72986e+07	1.08538e+07	1.68957e+07	1.21024e+07	2.0155e+07	1.53169e+07	1.18061e+07	1.14814e+07	1.94292e+07
1.23	1.49894e+07	1.45434e+07	1.42497e+07	1.34031e+07	9.5101e+06	1.01549e+07	1.52625e+07	8.35006e+06	1.30742e+07	1.04174e+07	1.64895e+07	1.37741e+07	1.08767e+07	9.11096e+06	1.65027e+07
1.21	1.10465e+07	9.84465e+06	1.04695e+07	9665438	7.57558e+06	7.96712e+06	1.30124e+07	6.57574e+06	1.01908e+07	8.32144e+06	1.14586e+07	1.10096e+07	8.39309e+06	6.66908e+06	1.14641e+07
1.19	8.02071e+06	7.25861e+06	8.10292e+06	7.23666e+06	6.54555e+06	6.78418e+06	9.88552e+06	5.71186e+06	7.95279e+06	6.82115e+06	8.84342e+06	8.57133e+06	6.68484e+06	5.71062e+06	9.03185e+06
1.17	6.09161e+06	5.60722e+06	6.00047e+06	5.3664e+06	5.15696e+06	5.47186e+06	7.35624e+06	4959031	6.0878e+06	5.31804e+06	6.57886e+06	6.35653e+06	5.286e+06	4.89357e+06	6.80733e+06
1.15	5.07076e+06	4.78966e+06	4.73761e+06	4.18163e+06	4.26987e+06	4.79439e+06	5.96049e+06	4.39209e+06	4.90721e+06	4.42211e+06	5.23376e+06	5.14243e+06	4.42998e+06	4.35973e+06	5.51393e+06
1.13	4.72173e+06	4.60472e+06	4.33041e+06	3.77875e+06	4.11566e+06	4.76342e+06	5.654e+06	4.51622e+06	4.54907e+06	4.3035e+06	4.73203e+06	4.86771e+06	4.20406e+06	4.46065e+06	5.20952e+06
1.11	4.79404e+06	4.60474e+06	4.3967e+06	3.77609e+06	4.11986e+06	4.96511e+06	5.73753e+06	4.81851e+06	4630063	4.37278e+06	4.66189e+06	4.80657e+06	4.33165e+06	4.70847e+06	5.47228e+06
1.09	4.96234e+06	4.7934e+06	4.40113e+06	3.74926e+06	4.22739e+06	5.13936e+06	5.86408e+06	5.03901e+06	4.81982e+06	4.58401e+06	4.75955e+06	4.9475e+06	4.48996e+06	4.94303e+06	5.75338e+06
1.07	5.28236e+06	5.09035e+06	4.37802e+06	3.87454e+06	4.54275e+06	5.47868e+06	6.01942e+06	5.35539e+06	4.81438e+06	4.81679e+06	4.88996e+06	5.09551e+06	4.63808e+06	5.21808e+06	5.76521e+06
1.05	1.15713e+07	1.02831e+07	1.22866e+07	1.12103e+07	1.12382e+07	1.44355e+07	1.46211e+07	1.63101e+07	1.24235e+07	1.09738e+07	1.15345e+07	1.26282e+07	1.06795e+07	15506078	1.28836e+07
1.03	3.47127e+07	26179154	3.142e+07	3.55729e+07	3.54357e+07	4.26393e+07	3.91416e+07	4.93583e+07	3.02159e+07	2.93955e+07	2.8859e+07	3.33155e+07	3.18899e+07	5.00435e+07	3.33848e+07
1.01	1.67462e+07	1.23704e+07	1.55215e+07	1.69505e+07	1.54682e+07	2.02873e+07	1.75978e+07	2.3337e+07	1.68202e+07	1.38541e+07	1.43355e+07	1.68064e+07	1.47111e+07	2.43788e+07	1.74101e+07
0.99	3.18847e+07	2.44378e+07	3.10063e+07	3.39254e+07	3.22398e+07	4.01847e+07	3.66046e+07	4.74309e+07	3.0929e+07	2.79003e+07	2.80042e+07	3.20911e+07	2.95574e+07	4.80118e+07	3.2144e+07
0.97	3.83174e+07	2.71703e+07	3.54397e+07	3.94802e+07	3.64731e+07	4.69536e+07	4.13561e+07	5.49011e+07	3.68966e+07	3.17692e+07	3.19947e+07	3.80655e+07	3.48225e+07	5.60116e+07	3.80283e+07
0.95	6.3067e+07	3.87683e+07	5.56611e+07	6.43742e+07	5.36845e+07	7.55815e+07	61025266	9.03942e+07	6.41469e+07	4.78239e+07	4.95973e+07	6.30785e+07	5.52544e+07	9.66787e+07	6.36035e+07
0.93	2.79375e+07	2.06628e+07	2.73854e+07	2.83869e+07	2.4728e+07	3.0443e+07	2.75299e+07	3.38131e+07	2.92099e+07	2.18568e+07	2.54061e+07	2.70341e+07	2.38892e+07	3.4587e+07	2.96644e+07
0.91	1.46989e+07	1.22227e+07	1.47521e+07	1.37495e+07	1.27301e+07	1.45635e+07	1.47177e+07	1.39391e+07	1.55322e+07	1.14551e+07	1.47089e+07	1.39963e+07	1.23547e+07	1.33497e+07	1.53846e+07
0.89	1.26867e+07	1.10774e+07	1.33852e+07	1.14213e+07	1.07871e+07	1.15562e+07	1.41147e+07	1.00241e+07	1.36226e+07	1.02782e+07	1.36213e+07	1.27367e+07	10405954	8.81683e+06	1.33438e+07
0.87	1.1738e+07	1.07609e+07	1.33296e+07	1.12954e+07	9.64877e+06	1.00743e+07	1.31256e+07	8.86221e+06	1.33686e+07	9.61026e+06	1.41883e+07	1.17489e+07	9.73849e+06	7.99419e+06	1.30359e+07
0.85	9.79528e+06	1.04756e+07	1.11219e+07	9.65774e+06	7.94881e+06	7.70932e+06	1.10232e+07	6.75788e+06	1.05641e+07	8.3585e+06	1.32955e+07	9.92424e+06	8.29083e+06	6.40361e+06	1.16237e+07
0.83	8.29964e+06	8.71155e+06	8.68463e+06	7.90852e+06	6.60655e+06	6.15956e+06	9.98089e+06	5.33844e+06	8.10375e+06	7.08817e+06	1.02072e+07	8.74289e+06	7.01823e+06	5.01472e+06	9.51568e+06
0.81	6.6377e+06	6.51022e+06	6.5405e+06	6070891	5.37273e+06	5.11719e+06	8.33789e+06	4.48232e+06	6.00169e+06	5.63954e+06	7.32196e+06	6.97735e+06	5.6272e+06	3.98304e+06	7.17383e+06
0.79	5.10998e+06	4.96131e+06	5.07337e+06	4617238	4.47957e+06	4.24337e+06	6.20129e+06	3.94065e+06	4.69947e+06	4.4792e+06	5.49644e+06	5.35568e+06	4.5483e+06	3.36467e+06	5.45492e+06
0.77	4.17119e+06	4.18315e+06	4.23504e+06	3.79629e+06	3.83031e+06	3.79222e+06	5.01877e+06	3.56654e+06	3.97255e+06	3.81063e+06	4.57802e+06	4.42264e+06	3.83484e+06	2.9642e+06	4.56641e+06
0.75	3.70839e+06	3.62214e+06	3.64035e+06	3.29686e+06	3.54028e+06	3.41315e+06	4.40433e+06	3.24617e+06	3.52058e+06	3.39974e+06	3944328	3.95254e+06	3.43458e+06	2.68704e+06	4.02431e+06
0.73	3.38003e+06	3.27406e+06	3.23229e+06	2.81144e+06	3.21701e+06	3.16704e+06	4.1149e+06	3.18351e+06	3.1672e+06	3.01915e+06	3.48081e+06	3.55675e+06	3.13027e+06	2.64452e+06	3.67057e+06
0.71	3.34642e+06	3.24944e+06	2.96304e+06	2.62251e+06	3.19387e+06	3.2699e+06	4.06516e+06	3.26507e+06	3.16757e+06	3.07784e+06	3.33871e+06	3.59184e+06	3.13792e+06	2.82441e+06	3.66478e+06
0.69	2.99228e+06	2.97096e+06	2.60017e+06	2.30695e+06	2.90403e+06	2.94133e+06	3.77494e+06	2.91746e+06	2.87963e+06	2.8038e+06	3.03227e+06	3.20344e+06	2.84905e+06	2.35429e+06	3.35946e+06
0.67	2.51713e+06	2.36074e+06	2.28418e+06	2.0757e+06	2.41005e+06	2.28727e+06	2.99432e+06	2.27854e+06	2.34219e+06	2.22946e+06	2.53061e+06	2.63315e+06	2.27127e+06	1.77579e+06	2.68478e+06
0.65	2.05815e+06	1.93707e+06	2.06473e+06	1.77588e+06	2.03077e+06	1.89803e+06	2.50596e+06	1.84511e+06	1.90729e+06	1.83326e+06	2.20656e+06	2.21006e+06	1.91954e+06	1.37149e+06	2.1447e+06
0.63	1.88417e+06	1.75534e+06	1.80785e+06	1.61519e+06	1.84413e+06	1.6938e+06	2.26964e+06	1.68053e+06	1.71635e+06	1.63646e+06	1.93801e+06	1.98302e+06	1.75912e+06	1.26672e+06	1.95953e+06
0.61	1.73518e+06	1.58599e+06	1.67845e+06	1.51278e+06	1.63792e+06	1.51031e+06	2.02994e+06	1.50811e+06	1.57872e+06	1.40026e+06	1.81085e+06	1.78255e+06	1.56193e+06	1.10869e+06	1.71355e+06
0.59	1.54366e+06	1.50953e+06	1.61053e+06	1.40949e+06	1.59766e+06	1.41099e+06	1.94505e+06	1.42405e+06	1.49317e+06	1.37057e+06	1.67371e+06	1.71381e+06	1.41103e+06	992613	1.6169e+06
0.57	1.4598e+06	1.29078e+06	1.35404e+06	1.21629e+06	1.40907e+06	1.18358e+06	1.66322e+06	1.23566e+06	1.2949e+06	1.17992e+06	1.49667e+06	1.46727e+06	1.25826e+06	868186	1.46559e+06
0.55	1.21421e+06	1.10397e+06	1.25909e+06	1.12245e+06	1.27738e+06	1.11425e+06	1.50814e+06	1.13665e+06	1.14477e+06	1.00865e+06	1.36899e+06	1.35728e+06	1.16407e+06	786638	1.27122e+06
0.53	1.15031e+06	1.06972e+06	1.17391e+06	1.06101e+06	1.17977e+06	999881	1.39313e+06	1.02885e+06	1.09945e+06	937597	1.23728e+06	1.28958e+06	1.05037e+06	664303	1.19663e+06
0.51	1.04852e+06	943003	1.08833e+06	943650	1.09968e+06	860671	1.27077e+06	936882	1.03714e+06	908886	1.13944e+06	1.13454e+06	974575	601695	1.13432e+06
Bin	Herbivore
(ppm)	1	2	3	4	5	6	7	8	9	10	11	12	13	14	15
9.99	1.04481e+06	1.56192e+06	14835	22163.8	-90210.5	17502.2	89938	-137046	112863	49301	134312	18952.3	-49017.4	-52851.8	58746.3
9.97	1.09364e+06	1.66175e+06	40782.7	96885.4	-84520.5	27029.7	42423.1	-81018.5	38892	13108.9	115354	34800.5	-52711.7	-75646.8	118616
9.95	1.01949e+06	1.61094e+06	-32454.8	68854	-45996.7	15937.2	72327.8	-74820.1	53089.2	18275.6	149289	-3802.47	-27218.9	-51441.1	83305.4
9.93	1.03519e+06	1.6584e+06	9198.47	1244.85	-96537.7	-23713	115837	-62068.9	83480	22310.8	132838	-24146.4	-112677	-38393	93708.9
9.91	1.09316e+06	1.62778e+06	-11968.1	45078	-51638.9	2521.77	40971.8	-77346.8	79099.3	14790.8	142418	-16411	-79450.1	-76330.4	114498
9.89	1.09365e+06	1.63084e+06	53458	78469.9	-76787.9	27087.3	64933.1	-64508.3	86286.2	35368	141889	-24738.6	-21015	-90699.7	78570
9.87	1.09051e+06	1.69344e+06	13066.7	47321.7	-105698	17842.2	81530.9	-88285.8	116289	-11856.7	159601	39786	-5527.01	-55208.7	117500
9.85	1.10231e+06	1.6055e+06	49649	63820.2	-28897.6	8011.15	74607.3	-69868.9	93874.6	19957.3	124304	48489.9	-30781.5	-45840.7	99001.8
9.83	1.07974e+06	1.61894e+06	-40226.3	68775.4	-75442.7	8313.91	77513.2	-115888	91415.7	40942.2	116109	21716.2	-2637.15	-89961.1	141065
9.81	1.1265e+06	1.69306e+06	21664.6	18912.3	-82009.6	18237.4	91058.9	-74203.1	51530.1	68100.9	168618	2249.06	-51948.9	-104797	85237.4
9.79	1.12585e+06	1.69885e+06	26976.9	61124.3	-53729.5	-11164.5	136706	-85367.5	62721.8	20752.4	188228	10176.5	-42180.2	-79520.5	147699
9.77	1.09959e+06	1.65358e+06	-33901.1	82524.8	-60450	47600.8	60723.2	-100507	124389	65190	145563	-115.8	-76952	-61412	108040
9.75	1.13022e+06	1.69514e+06	18684	62377.2	-11761.2	25458.7	32889.5	-131121	110629	47937.2	150674	31614.2	-24931.1	-38777.2	157015
9.73	1.11072e+06	1.62771e+06	14524.5	45609.7	-44507.9	-10246.6	117491	-91779.5	156449	62068.6	165729	-2623.7	-41433.6	-70112	132470
9.71	1.12036e+06	1.6682e+06	4930.96	102038	-53826.3	16094.6	103478	-46543	107305	34482.4	190393	-811.75	-21371.3	-74591.1	159248
9.69	1.14737e+06	1.68851e+06	47015.1	71190.8	-54295.3	29153.2	145436	-62215.1	57344.6	19803.2	169754	-18877.2	-26967.7	-25071	136407
9.67	1.09221e+06	1.70708e+06	40984.1	68223.4	-2850.12	48693	131768	-64724.2	111883	30276.4	193542	19266.6	15100.4	-25867.1	124827
9.65	1.1203e+06	1.6834e+06	36706.8	106471	-82225.5	35354.2	122360	-46511	164180	31632.3	203118	77825.4	-7537.7	-19163.6	115020
9.63	1.18521e+06	1.73713e+06	61270.5	95380.1	-26887.4	51728.8	155214	-64155.4	186504	48104.6	207522	22175.7	-26257	-54423.9	116684
9.61	1.17236e+06	1.74312e+06	31946.5	95358.4	-57137.3	78991.6	154090	-3211.28	175170	113246	238522	28061.4	5098.58	22628.5	112572
9.59	1.30134e+06	1.86995e+06	199647	233494	-13249.7	164572	260002	-4376.97	183320	113585	298386	184623	133065	55928.2	235223
9.57	1.16089e+06	1.7365e+06	24636.5	135042	43227.9	118212	129640	-4290.14	148982	79620	261799	5796.18	16437.8	52097	150013
9.55	1.15365e+06	1.72253e+06	59191.6	118584	-31087.4	95480.7	140896	-47792.2	174295	95636.5	237513	30500	-8350.29	-43033.9	140681
9.53	1.15696e+06	1717041	47088.7	66899.2	-2651	47005.4	130466	-75462.8	184740	94147.2	219965	51307.2	14350.1	-56563	179264
9.51	1.16799e+06	1.77309e+06	90557.8	139500	-49596.9	80415	198771	-29192.5	152572	87140.5	196299	64273.7	30338.1	-74329.1	168120
9.49	1.1886e+06	1.74252e+06	71524.2	109027	-5289.93	143126	173525	-42392.2	192048	79901.7	238734	70500.4	8981.06	15617.8	203294
9.47	1.24268e+06	1752002	77732.3	140304	29153.8	76140.2	127142	12926	228130	79368.1	269210	29832.6	34529.5	1321.11	153023
9.45	1.17981e+06	1.78417e+06	119649	73467.6	-8556.84	136260	173587	-3894.63	144386	88408.7	296885	112054	39099	9190.8	167359
9.43	1.25661e+06	1.83805e+06	108631	155796	-18171.3	86350.2	182485	-30153.8	170685	87398.7	292374	82754.4	23119.7	-30683.7	203922
9.41	1.21062e+06	1.83094e+06	113683	120907	50691.2	170174	151565	12882.5	150179	111319	261729	104546	69266.6	30385.2	162575
9.39	1.31027e+06	1.89816e+06	265021	185198	-31412.9	243256	200330	22026.2	191328	99436.3	381681	150352	42400.8	101609	332839
9.37	1.25882e+06	1.84551e+06	179715	189639	-12863.8	113670	151461	104597	248022	130404	323393	112021	85019.5	49396.3	238601
9.35	1.30621e+06	1.86494e+06	210285	236220	17692.8	166412	251040	20984.8	187245	118053	326041	150401	103807	71858.2	284698
9.33	1.30294e+06	1.81289e+06	274860	227224	26743.7	207513	272125	17087.9	242566	157734	399411	161658	176619	71698.9	369110
9.31	1.31206e+06	1.84869e+06	145834	157119	44528	183496	232312	35701.3	188531	126970	313739	99044.7	111337	46424.3	195025
9.29	1.29858e+06	1.83246e+06	145109	156781	51282	115653	256898	17741.8	224583	123891	340483	109603	85623.4	90193.3	225261
9.27	1.27944e+06	1.8376e+06	152282	153979	46865.4	149959	196825	36955.1	184443	112326	298451	76674.1	104758	47286.3	235074
9.25	1.31895e+06	1.93706e+06	215758	218194	104132	211578	197753	20580.3	200537	158226	356503	99937.7	142387	98525.3	293792
9.23	1.32506e+06	1.86857e+06	208031	227744	47008.9	193979	260449	44821.2	247520	156816	356632	105586	117973	27412	301699
9.21	1.29383e+06	1.84232e+06	197763	215184	32009.1	205267	250010	38735.2	244593	159833	326109	168994	100381	46046.3	263346
9.19	1.32509e+06	1.84921e+06	150422	204649	70879.6	220267	212270	88630.1	237721	144250	327459	111059	134407	61314	248259
9.17	1.31547e+06	1.87811e+06	199878	211400	93605.8	175038	261164	85128.2	264028	176825	364678	159593	95375.1	65745.1	272992
9.15	1.29312e+06	1.89103e+06	194137	226239	85231.7	184709	285784	93343.3	290590	112151	300251	99159.8	151386	65216	287748
9.13	1.53265e+06	2.02716e+06	273298	424454	245231	247302	388133	106891	353694	235631	400379	332526	162778	131899	337628
9.11	1.35896e+06	1.91325e+06	216248	272000	157144	235367	263751	40954.3	375166	208480	386733	209189	128588	105373	368108
9.09	1.33633e+06	1.87328e+06	201937	216265	58882.8	220290	184017	68656.6	226956	180244	394238	177813	125298	88905.9	271003
9.07	1.32031e+06	1.91763e+06	243181	181126	78261.3	225486	244781	96471.9	271779	160189	410099	122435	120835	97270.3	267551
9.05	1.32048e+06	1.92343e+06	180866	204164	54461.8	201615	229551	91318.7	259480	151149	360939	139631	126711	128786	298320
9.03	1.45283e+06	1.98159e+06	251130	206358	34423.6	262875	300990	35836.7	291466	209648	416078	210371	135060	51836	413284
9.01	1.41295e+06	1.95919e+06	223928	249759	119003	188541	231377	106969	348092	192016	352411	121812	134297	36861	328884
8.99	1.47135e+06	2.08876e+06	324587	282760	128380	256409	341784	95580.1	324311	232647	515323	239968	192288	124851	399877
8.97	1.39578e+06	1.93793e+06	242023	220921	84313.7	210400	306121	126951	300508	188250	436188	195468	191047	117358	357000
8.95	1.39266e+06	1.96715e+06	193991	228960	157252	199908	306232	78545.6	286076	157237	434488	200212	166567	131795	309437
8.93	1.59798e+06	2.15749e+06	383068	489260	478150	349654	584641	377892	645345	339461	620448	413153	396265	398132	497944
8.91	1.38301e+06	1.98903e+06	250166	291000	109289	224604	328332	91667.9	318516	241195	426678	180684	187451	177937	310339
8.89	1.44722e+06	1.98109e+06	312393	276485	102397	290688	298543	112404	322748	149145	468244	171581	208528	79075.2	337226
8.87	1.39834e+06	1.97722e+06	218350	273865	88986	182568	260610	48299.5	288840	185483	404545	140916	197119	141246	324875
8.85	1.49196e+06	2.06736e+06	281971	302857	161436	226751	329819	96296.3	329851	299664	451906	238605	167041	160866	344952
8.83	1.74212e+06	2.38564e+06	383376	714623	447137	419122	687796	198399	702239	445615	498883	520465	389701	205918	727726
8.81	1.44316e+06	2.00254e+06	253932	323766	137512	258064	339345	132683	379628	218524	412432	250801	214565	127538	368350
8.79	1.41144e+06	1.98023e+06	225484	305232	115346	272746	316448	105940	315976	193809	424127	199116	186502	96049.8	284780
8.77	1464651	2.02697e+06	250302	335404	100525	255662	339673	133933	341047	210863	425380	234740	192670	129317	315269
8.75	1.47313e+06	1.99608e+06	267020	200222	122579	242040	302836	98638.6	354455	210265	464963	214602	204824	127193	348148
8.73	1.40925e+06	2.06077e+06	261907	214782	128113	235486	362296	81231.1	284458	261586	414027	222944	169457	135023	350334
8.71	1.45975e+06	2.09727e+06	329852	277297	119680	256465	330167	54658.2	325853	181686	419498	240584	165452	151703	317234
8.69	1.46985e+06	2.14346e+06	255372	285232	145604	273440	350751	83827.2	327124	235544	458031	164740	206606	88179.1	275963
8.67	1.47431e+06	2.0938e+06	236101	245400	127612	260494	349501	96270.4	349047	190824	459858	196619	246389	100533	302230
8.65	1.49768e+06	2.12373e+06	292381	314825	116028	224143	336664	89508.8	352276	250867	509235	253626	228382	213562	387396
8.63	1.57006e+06	2.15359e+06	354166	302335	208561	336469	408207	109850	361613	195601	504244	306962	281139	183762	404920
8.61	1.87512e+06	2.48351e+06	493203	542336	405124	478458	570823	349369	585559	447492	709358	480039	311737	343212	655350
8.59	2.24709e+06	2.6692e+06	1.62891e+06	869165	476342	2.20463e+06	741912	577785	670202	998716	1.66379e+06	929178	491192	569028	1.22511e+06
8.57	1.62017e+06	2.18093e+06	538957	457376	328136	567557	477544	341545	425518	336659	770641	355059	308953	328201	522976
8.55	1.53386e+06	2.12306e+06	357444	359840	260641	358834	363834	136630	382914	299286	591183	260492	292317	201054	483659
8.53	1.6163e+06	2.17221e+06	486301	458346	210315	429726	399002	239539	416300	277936	628529	329281	280664	259470	498654
8.51	1.61531e+06	2.26568e+06	391026	384592	212040	360981	398646	220367	386766	290310	569137	316452	266094	215706	455066
8.49	1.60493e+06	2.215e+06	417809	420400	276867	353364	456093	342532	425558	321740	619940	269989	285606	273528	502760
8.47	1.65568e+06	2.33279e+06	528901	455214	243414	465876	473040	240191	438160	360234	739680	366104	291560	373780	494859
8.45	1.91986e+06	2.79391e+06	749962	736587	609308	749671	844110	430117	851363	629986	1.03537e+06	646605	548774	621725	803888
8.43	1.65807e+06	2.25921e+06	393621	453743	275041	449433	475875	241665	470819	321900	647965	383697	380606	286534	528743
8.41	1.6868e+06	2.30767e+06	452207	514911	257918	455388	516308	242844	465919	347893	718641	383307	403151	286322	587286
8.39	1.8338e+06	2.43831e+06	530466	534133	342835	484436	484676	276665	532075	394148	768279	429737	394884	362456	601402
8.37	1851743	2.50909e+06	593794	552558	631268	479422	641576	554120	704717	429796	905792	466447	505819	570778	679604
8.35	2.10006e+06	2.65992e+06	873339	777636	501365	714926	780691	639020	691549	565356	1.01014e+06	696571	537539	642601	1.03726e+06
8.33	1.96487e+06	2.57047e+06	1.03636e+06	790791	550553	750185	805544	930249	770312	546867	1.38879e+06	735444	525588	766666	942664
8.31	1.85972e+06	2.54204e+06	593277	612733	385178	572505	616117	483941	620260	450520	879747	552127	486430	468739	715385
8.29	1.95276e+06	2.62348e+06	635038	649464	501190	576927	653212	454911	676417	446587	887496	541332	495138	468602	722441
8.27	2.22718e+06	2.79529e+06	713693	810779	536046	674413	788713	524904	794654	596444	1.0034e+06	623376	793615	689642	925394
8.25	2.98618e+06	3.41172e+06	1.92743e+06	1.41056e+06	1.10285e+06	2.23057e+06	1.15298e+06	945975	1.04407e+06	1.25541e+06	2.05642e+06	1.41145e+06	747873	841817	1.78355e+06
8.23	2.62966e+06	3.19985e+06	1.61114e+06	1.40021e+06	1.33624e+06	1.30127e+06	1.3136e+06	1.40634e+06	1.25408e+06	995914	1.88267e+06	1.29224e+06	833788	1.33457e+06	1.67739e+06
8.21	3.35489e+06	4.03952e+06	1.77649e+06	1.96132e+06	2.34813e+06	1.62192e+06	2.15161e+06	2.77797e+06	2.11212e+06	1.54604e+06	2.3835e+06	1.88862e+06	1.6753e+06	2.25461e+06	2.13961e+06
8.19	3.37621e+06	3.89817e+06	2.03137e+06	2.15134e+06	2.75639e+06	1.94874e+06	2.4595e+06	3.94615e+06	2.55676e+06	1.88978e+06	2.92642e+06	2.21662e+06	2.1464e+06	2.96911e+06	2.29256e+06
8.17	2.58318e+06	3.02677e+06	1.54453e+06	1.50874e+06	1.9474e+06	1.42811e+06	1.75495e+06	3.21978e+06	1.94018e+06	1.23207e+06	2.56781e+06	1.48862e+06	1.64171e+06	2.23454e+06	1.62179e+06
8.15	1.98258e+06	2.6586e+06	773039	934458	951468	728895	887703	1.05178e+06	865258	581350	1.25047e+06	718657	673722	910687	984693
8.13	2.13104e+06	2.8699e+06	850448	1.0192e+06	937643	751408	964788	892090	925977	636937	1.36146e+06	775998	751858	968842	1.05591e+06
8.11	2.43352e+06	3.09514e+06	1.59107e+06	1.15129e+06	977611	1.49313e+06	1.11209e+06	954858	1.13547e+06	933608	2.27823e+06	1.14183e+06	1.01992e+06	1.25729e+06	1.35299e+06
8.09	2.25983e+06	2.93421e+06	1.31762e+06	1.05571e+06	887272	1.25365e+06	1.02714e+06	853718	1.07718e+06	891972	1.85612e+06	974458	909009	955624	1.18673e+06
8.07	2.28283e+06	2.90495e+06	922222	1.11015e+06	983877	872952	1.08289e+06	960583	1.09832e+06	708758	1.26718e+06	929039	777625	805228	1.11766e+06
8.05	2.29372e+06	3.03579e+06	891467	1.10634e+06	1.03761e+06	775011	1.08109e+06	878837	1.10974e+06	678176	1.30706e+06	895050	682621	903044	1.14505e+06
8.03	2.47299e+06	3.11144e+06	996686	1.14307e+06	1.37047e+06	900737	1.17312e+06	1.10066e+06	1.17351e+06	734917	1.52095e+06	883747	810721	1.14669e+06	1.16033e+06
8.01	2.59838e+06	3.23082e+06	1.04676e+06	1.19265e+06	1.22011e+06	911212	1.19061e+06	1.07663e+06	1.26964e+06	736756	1.44978e+06	943084	786691	1.09282e+06	1.23415e+06
7.99	3.01824e+06	3.72862e+06	1.27903e+06	1.42465e+06	1.39106e+06	1.04198e+06	1324515	1.29676e+06	1.58249e+06	971322	1.73277e+06	1.16184e+06	970309	1.23673e+06	1.73462e+06
7.97	6.96008e+06	8.45783e+06	5.53056e+06	5.36482e+06	4.23218e+06	6.36914e+06	5.53473e+06	1.46935e+06	7.01864e+06	4.89164e+06	4.35587e+06	5.39505e+06	1.5323e+07	6.34173e+06	8.80037e+06
7.95	9.89089e+06	5.41386e+06	1.32259e+07	7.68289e+06	1.0687e+07	1.13125e+07	8.97006e+06	1.87281e+07	1.06645e+07	9.65547e+06	1.73593e+07	8.19641e+06	2.09141e+06	1.42481e+07	4.87057e+06
7.93	2.65451e+06	3.07752e+06	1.83625e+06	1.98163e+06	3.67891e+06	1.83406e+06	2.31234e+06	7.03178e+06	3.10973e+06	1.60421e+06	2.86998e+06	1.86271e+06	3.07861e+06	3.76538e+06	1.7098e+06
7.91	2.03652e+06	2.65739e+06	1.14415e+06	1.32336e+06	2.32317e+06	1.10662e+06	1.37679e+06	3.70421e+06	1.58986e+06	841916	1.88382e+06	1.17091e+06	1.15367e+06	1.86942e+06	1.19585e+06
7.89	2.04966e+06	2.63889e+06	1.07894e+06	1.1161e+06	1.64364e+06	985878	1.13673e+06	2.34966e+06	1.18812e+06	712386	1.54848e+06	979052	1.19644e+06	1.76424e+06	1.1595e+06
7.87	2.08621e+06	2.80593e+06	1.33703e+06	1.17232e+06	1.89342e+06	1.19449e+06	1.22124e+06	4.83114e+06	1.39854e+06	841858	1.78357e+06	1.09108e+06	1.90995e+06	3.06433e+06	1.27648e+06
7.85	2.06143e+06	2.68417e+06	1.14729e+06	1.05421e+06	1.16042e+06	1.02956e+06	1.05302e+06	1.47229e+06	1.07384e+06	728679	1.54391e+06	957913	953034	1.22262e+06	1.12103e+06
7.83	2.03371e+06	2.65218e+06	1.01046e+06	974628	925242	949730	970789	1.03052e+06	922417	661584	1.39013e+06	868990	840478	992494	1.08306e+06
7.81	1.98893e+06	2.62613e+06	1.01211e+06	956391	797026	880282	867678	724152	860133	681815	1.29351e+06	826247	777516	903721	1.05182e+06
7.79	2.02793e+06	2.69007e+06	910581	983852	779138	873987	912057	827565	844282	654947	1.23464e+06	789982	668713	776450	1.00196e+06
7.77	2.14088e+06	2.83693e+06	975262	1.10061e+06	831031	924327	955859	806287	931531	737954	1.23274e+06	956995	755334	772537	1.20103e+06
7.75	2.20458e+06	2.87487e+06	1.37219e+06	1.22517e+06	892698	1.19347e+06	1.03041e+06	802547	982640	857949	1.47246e+06	1.12169e+06	863828	937826	1.36186e+06
7.73	2.29889e+06	3.22914e+06	1.74429e+06	1.30927e+06	1.40698e+06	1.67611e+06	1.44875e+06	2.03723e+06	2.10476e+06	1.18941e+06	1.85418e+06	1.19513e+06	1.36887e+06	1.6651e+06	1.35303e+06
7.71	2.35357e+06	3.1102e+06	2.00381e+06	1.46014e+06	1.90892e+06	1.91388e+06	1.63086e+06	2.84628e+06	2.29421e+06	1.29426e+06	2.37762e+06	1.35737e+06	1.60568e+06	2.16521e+06	1.5327e+06
7.69	2.07366e+06	2.77873e+06	1.15188e+06	1.04507e+06	1.09633e+06	1.06051e+06	1.01394e+06	1.14067e+06	1.16517e+06	792367	1.3752e+06	867624	922770	966440	1.10465e+06
7.67	2.11885e+06	2.72393e+06	966895	1.02413e+06	1.25329e+06	908812	1.00101e+06	1.35387e+06	1.19789e+06	843573	1.28318e+06	803781	921942	989379	973660
7.65	2.02051e+06	2.75855e+06	920089	907742	807622	831853	869404	690772	943001	684754	1121433	703625	695039	656817	951545
7.63	2.01249e+06	2.73909e+06	890199	888469	684210	769508	813271	518145	830529	712564	1.10329e+06	736859	612821	598841	940911
7.61	2.04889e+06	2.83588e+06	891097	843910	647421	830217	833836	509503	904021	703758	1.08646e+06	769893	689611	594624	927583
7.59	2.1423e+06	2.89338e+06	899786	903384	701866	808311	801270	578603	918812	659328	1.0872e+06	785189	701460	579848	960680
7.57	2.17106e+06	2.9397e+06	964505	905500	767130	856267	914541	627654	918531	749630	1.18763e+06	720727	746466	681757	935517
7.55	2429955	3.27653e+06	1.07325e+06	1.12608e+06	1.21393e+06	973100	1.08053e+06	869844	1.20638e+06	886615	1.2535e+06	939704	851108	857607	1.12535e+06
7.53	3.5836e+06	4.76841e+06	2.94025e+06	2.37681e+06	4.60092e+06	2.86838e+06	3.20201e+06	5.76627e+06	4.35314e+06	2.35837e+06	3.05475e+06	2.42831e+06	3.07363e+06	3.81179e+06	2.4896e+06
7.51	2.87192e+06	3.70262e+06	2.31907e+06	1.87827e+06	2.88706e+06	2.30003e+06	2.16983e+06	3.99146e+06	3.17665e+06	1.68239e+06	2.84631e+06	1.72222e+06	2.21027e+06	2.80062e+06	1.91065e+06
7.49	2.53965e+06	3.30871e+06	1.19955e+06	1.18538e+06	1.08076e+06	1.13271e+06	1.14012e+06	1.00628e+06	1.29548e+06	971144	1.4787e+06	1.01734e+06	1.07598e+06	1.00212e+06	1.27153e+06
7.47	2.77621e+06	3.63248e+06	1.42236e+06	1.2121e+06	1.06415e+06	1.23213e+06	1.24095e+06	1.02597e+06	1.35497e+06	1.00259e+06	1.49324e+06	1.08185e+06	1.15319e+06	1.03797e+06	1.29753e+06
7.45	2.96624e+06	4.11208e+06	1.41613e+06	1.40178e+06	1.04306e+06	1.30333e+06	1.34445e+06	960954	1.44824e+06	1.17921e+06	1.55108e+06	1.22729e+06	1.39914e+06	1.04473e+06	1.4378e+06
7.43	5.14379e+06	6.83968e+06	4.04541e+06	3.60765e+06	5.16453e+06	3.85396e+06	4.19229e+06	6.65525e+06	5.60559e+06	3.59029e+06	4.34891e+06	3.26604e+06	4.28284e+06	4.94887e+06	3.87199e+06
7.41	8.94448e+06	1.06688e+07	1.06232e+07	9.10746e+06	1.60818e+07	1.01432e+07	1.1049e+07	2.33113e+07	1.68142e+07	9.61306e+06	1.19702e+07	8.34834e+06	11389691	1.54706e+07	9.53494e+06
7.39	3280730	3.77822e+06	2.20563e+06	2.25494e+06	2.87098e+06	2.13522e+06	2.1892e+06	3.43035e+06	3.03547e+06	1.90193e+06	3.02178e+06	1.89431e+06	2.30693e+06	2.47302e+06	2.17385e+06
7.37	6.47005e+06	7.83904e+06	6.50513e+06	5.72438e+06	8.87752e+06	6.22692e+06	6.71454e+06	1.23638e+07	9.61972e+06	5.85197e+06	7.19465e+06	5.23754e+06	6.71919e+06	8.62166e+06	5.97011e+06
7.35	4.8119e+06	5.44326e+06	4.13288e+06	3.86621e+06	5.07189e+06	3.83915e+06	4.03175e+06	6.465e+06	5.32893e+06	3.47123e+06	4.95458e+06	3.363e+06	4.04505e+06	4.67276e+06	3.76698e+06
7.33	7.77788e+06	9.65732e+06	7.84942e+06	6.65703e+06	9.70076e+06	7.4723e+06	7.83653e+06	1.36426e+07	1.10291e+07	6.95244e+06	8.13592e+06	6.23803e+06	7.96768e+06	9.77892e+06	7.01163e+06
7.31	9.06747e+06	1.02738e+07	1.23677e+07	1.00731e+07	1.73606e+07	1.20575e+07	1.1957e+07	2.58751e+07	1.88909e+07	1.04319e+07	1.43332e+07	9.47077e+06	1.26084e+07	1.72362e+07	1.0272e+07
7.29	3.95759e+06	4.25586e+06	3.53537e+06	3.17327e+06	3.48532e+06	3.39116e+06	3.18369e+06	4019202	4.00596e+06	2.86101e+06	4.24738e+06	2.94759e+06	3.39153e+06	3.36762e+06	3.12576e+06
7.27	4.40356e+06	5.14147e+06	4.31842e+06	3.45665e+06	3.67082e+06	4.17022e+06	3.77914e+06	4.82183e+06	4.97821e+06	3.31614e+06	4.62481e+06	3.39566e+06	3.91924e+06	4.2554e+06	3.50724e+06
7.25	4.27774e+06	4.81544e+06	4.09338e+06	3.3141e+06	3.3653e+06	3.91526e+06	3.43246e+06	4.27079e+06	4.18316e+06	3.05928e+06	4.68844e+06	3.18846e+06	3.69593e+06	3.94094e+06	3.4129e+06
7.23	4.00296e+06	4.55157e+06	3.26994e+06	2.86558e+06	2.43926e+06	3.11887e+06	2.87943e+06	2.51454e+06	3.192e+06	2.63606e+06	3.62355e+06	2.81798e+06	2.87358e+06	2.65998e+06	2.94524e+06
7.21	3.83037e+06	4.63221e+06	3.03504e+06	2.57969e+06	2.47937e+06	2.92948e+06	2.73954e+06	2.83603e+06	3.19427e+06	2.32539e+06	3.48179e+06	2.56674e+06	2.8771e+06	2.66517e+06	2.72835e+06
7.19	5.13232e+06	8.21493e+06	1.17888e+07	3.97053e+06	9.73861e+06	1.45893e+07	8.52105e+06	27240006	1.60465e+07	6.58612e+06	16277971	5.36978e+06	1.05847e+07	1.51481e+07	5.38134e+06
7.17	5.11115e+06	7.06465e+06	1.18098e+07	4.14213e+06	1.03408e+07	1.46206e+07	8.36607e+06	2.96344e+07	1.62557e+07	6.40677e+06	1.8121e+07	5.33926e+06	1.0972e+07	1.56941e+07	5.39078e+06
7.15	4.97277e+06	5.28223e+06	3527446	3.39481e+06	3.57267e+06	3.22496e+06	3.32259e+06	3.54667e+06	4.08491e+06	2.85686e+06	4.57939e+06	3.12909e+06	3.65228e+06	3.23363e+06	3.53784e+06
7.13	9.20639e+06	9.33685e+06	4.82997e+06	6.76386e+06	6.84916e+06	3.84147e+06	5.94216e+06	4.02596e+06	7.88154e+06	4.92067e+06	5.79479e+06	6.23762e+06	6.95936e+06	4.60784e+06	8.20214e+06
7.11	1.5747e+07	1.07719e+07	2.09924e+07	1.40014e+07	1.655e+07	1.93581e+07	1.6163e+07	2.2588e+07	1.88371e+07	1.64645e+07	2.52725e+07	1.4613e+07	1.62251e+07	2.26014e+07	1.31698e+07
7.09	4.20551e+06	4.01788e+06	3.51651e+06	3.61132e+06	3.53811e+06	3.32505e+06	3.22128e+06	3.23183e+06	3.91729e+06	3.03467e+06	4.44241e+06	3.51118e+06	3.2859e+06	3.05956e+06	3.44159e+06
7.07	3.28874e+06	3.59107e+06	2.93424e+06	2.57393e+06	2.36768e+06	2.80323e+06	2.56078e+06	2.50916e+06	2.79607e+06	2.37639e+06	3.41145e+06	2.58339e+06	2.8985e+06	2.62069e+06	2.57518e+06
7.05	3.18025e+06	3.72683e+06	2.6822e+06	2.38488e+06	2.10979e+06	2.54386e+06	2.40328e+06	2.20648e+06	2.4733e+06	2.14053e+06	2.98102e+06	2.38553e+06	2.7442e+06	2.41037e+06	2.445e+06
7.03	3.37706e+06	4.088e+06	3004022	2.51073e+06	2133711	3.01572e+06	2.67265e+06	2.57772e+06	2.71381e+06	2.40122e+06	3.27257e+06	2.56321e+06	3.4683e+06	2.82011e+06	2.57779e+06
7.01	3.19664e+06	3.6733e+06	2524053	2.32822e+06	1.96899e+06	2.47594e+06	2.2525e+06	2.15911e+06	2.35742e+06	2.03929e+06	2.77915e+06	2.24405e+06	2.66548e+06	2.29496e+06	2.42931e+06
6.99	3.81596e+06	4.20923e+06	2.42508e+06	3.32831e+06	2.6402e+06	2.43327e+06	2.7399e+06	2.06369e+06	2.80818e+06	2.35037e+06	2.55283e+06	2.67403e+06	2.54389e+06	2.18435e+06	2.92863e+06
6.97	3.76496e+06	4.13836e+06	2.44924e+06	3.22435e+06	2.64813e+06	2.46797e+06	2.73297e+06	2.01972e+06	2.81745e+06	2.3523e+06	2.68022e+06	2.74498e+06	2.60111e+06	2.2592e+06	2.83932e+06
6.95	3.41082e+06	3.94967e+06	2.44e+06	2.72851e+06	2.31746e+06	2.41542e+06	2.52362e+06	1.99603e+06	2.65392e+06	2.19102e+06	2.61963e+06	2.47231e+06	2.60883e+06	2.27059e+06	2.53352e+06
6.93	3.33999e+06	4.09798e+06	2.71629e+06	2.34168e+06	2.18614e+06	2.65114e+06	2.54144e+06	2.11037e+06	2.71614e+06	2.19256e+06	3.00938e+06	2.35681e+06	2.64683e+06	2.33333e+06	2.51064e+06
6.91	3.46076e+06	4.60662e+06	3.30143e+06	2.51813e+06	2.75683e+06	3.38231e+06	2.96413e+06	2.91924e+06	3.56519e+06	2.54196e+06	3.61705e+06	2.48316e+06	3.03198e+06	2.97662e+06	2.72903e+06
6.89	5.10453e+06	9.45894e+06	1.71975e+07	4.27688e+06	1.38368e+07	2.21973e+07	1.19146e+07	4.04814e+07	2.31308e+07	9.01415e+06	2.34582e+07	6.84238e+06	1.61878e+07	2.23523e+07	6.52772e+06
6.87	3.36596e+06	3.93684e+06	5.72183e+06	2.74519e+06	6.01995e+06	6.47578e+06	4.33474e+06	1.46166e+07	7.25466e+06	3.33309e+06	1.0714e+07	3.08457e+06	5.23919e+06	7.65493e+06	3.34419e+06
6.85	3.50711e+06	4.26596e+06	4.68961e+06	2.67709e+06	2.82722e+06	4.90527e+06	3.51312e+06	3.27036e+06	4.13327e+06	2.9514e+06	5.88571e+06	2.79088e+06	3.92702e+06	3.72095e+06	2.88018e+06
6.83	4.17342e+06	4.94198e+06	3.78462e+06	3.24387e+06	3.99426e+06	3.34454e+06	3.83523e+06	5.07641e+06	4.63485e+06	3.40233e+06	4.09672e+06	3.41937e+06	4.37777e+06	4.26975e+06	3.33853e+06
6.81	3.87639e+06	4.34167e+06	3.36775e+06	3.06198e+06	3.1222e+06	3.02005e+06	3.19247e+06	3.50991e+06	3.44646e+06	2.808e+06	3.5363e+06	3.11322e+06	3.41779e+06	3.13363e+06	3.27773e+06
6.79	3.32607e+06	3.63763e+06	3.23536e+06	2.64442e+06	2.22314e+06	2.66098e+06	2.63756e+06	2.13741e+06	2.62607e+06	2.28559e+06	3.05174e+06	2.73674e+06	2.65744e+06	2.37964e+06	3.14568e+06
6.77	2.8106e+06	3.30632e+06	2.47308e+06	2.02402e+06	1.81257e+06	2.37717e+06	2123917	2.10932e+06	2.34557e+06	1.88479e+06	2.68619e+06	2.03819e+06	2.41608e+06	2.13335e+06	2.18736e+06
6.75	2.92646e+06	3.74401e+06	3.87197e+06	2.24588e+06	1.81605e+06	3.59237e+06	2.73496e+06	2.04023e+06	2.71301e+06	2.26397e+06	3.71383e+06	2.65229e+06	2.74572e+06	2.58069e+06	3.07755e+06
6.73	2.88785e+06	3.60179e+06	3.32663e+06	2.06601e+06	2.64128e+06	3.15892e+06	2.75006e+06	3.86576e+06	3.3061e+06	2.36239e+06	3.7427e+06	2.36575e+06	3.34673e+06	3.35929e+06	2.40927e+06
6.71	2.73549e+06	3.31225e+06	2.23013e+06	1.83608e+06	2.25857e+06	2.00655e+06	2.22602e+06	3.44742e+06	2.63598e+06	2.0076e+06	2.2699e+06	2.05521e+06	2.77226e+06	2.59786e+06	2.03873e+06
6.69	2.61469e+06	3.31302e+06	2.14609e+06	1.75911e+06	1.50902e+06	2.01523e+06	1.90054e+06	1.71852e+06	1.977e+06	1.71457e+06	2.17009e+06	1.73379e+06	2.50818e+06	1.97393e+06	1.82586e+06
6.67	2.48483e+06	2.86171e+06	1.71183e+06	1.69448e+06	1.43975e+06	1.75945e+06	1.60153e+06	1.46728e+06	1.67592e+06	1.48021e+06	1.9944e+06	1.562e+06	1.95083e+06	1.71189e+06	1.67892e+06
6.65	2.57068e+06	2.88312e+06	1.53639e+06	1.97314e+06	1.54569e+06	1.77753e+06	1.57323e+06	1.26318e+06	1.72642e+06	1.4904e+06	1.70129e+06	1.64837e+06	1.63322e+06	1.50163e+06	1.80101e+06
6.63	2.52524e+06	2.88623e+06	1.49895e+06	1.93235e+06	1.4613e+06	1.72777e+06	1.57544e+06	1.16238e+06	1.72238e+06	1.42365e+06	1655424	1.64669e+06	1.51636e+06	1.46035e+06	1.77258e+06
6.61	2.12002e+06	2.45408e+06	1.32499e+06	1.30856e+06	1.06202e+06	1.34299e+06	1.27647e+06	1.0624e+06	1.36923e+06	1.15506e+06	1.48049e+06	1.19513e+06	1.37729e+06	1.15037e+06	1.34759e+06
6.59	2.0002e+06	2.44416e+06	1.23767e+06	1.15505e+06	876592	1.1964e+06	1.14151e+06	957396	1.3217e+06	1.05684e+06	1.33215e+06	1.04319e+06	1.37919e+06	1.08783e+06	1.2143e+06
6.57	1.94891e+06	2.4152e+06	1.1277e+06	1041349	780332	1.13124e+06	1.10977e+06	934844	1.2258e+06	993561	1.40858e+06	955086	1.46507e+06	1.10296e+06	1.11721e+06
6.55	1.85683e+06	2.36642e+06	1.04685e+06	918618	717832	1.00798e+06	1.00267e+06	858495	1.15101e+06	897756	1.17458e+06	874245	1.28244e+06	1.01619e+06	1.03942e+06
6.53	1.8518e+06	2.40543e+06	896876	867229	660474	837546	906442	767559	1.01113e+06	878970	1.12991e+06	832951	1.12289e+06	926622	961088
6.51	3.15902e+06	3.23468e+06	1.86772e+06	2.41796e+06	1.93871e+06	1.46129e+06	2.42152e+06	904085	2.2507e+06	1.66976e+06	2.23775e+06	1.83041e+06	1.12406e+06	1.18773e+06	2.41198e+06
6.49	1.70258e+06	2.15699e+06	816892	863617	640432	829065	920729	670997	900177	709435	1.04242e+06	782974	837643	699216	918372
6.47	1.73008e+06	2.18336e+06	750907	824866	651982	742271	801440	570617	889054	760894	961446	720135	809951	699430	874024
6.45	1.76134e+06	2.19948e+06	766041	771531	612713	736275	822959	519120	851517	696002	952636	713274	827569	690600	873207
6.43	1.74309e+06	2.20833e+06	698521	754783	609025	668901	820808	488448	860318	641407	906221	719073	744792	629360	843388
6.41	1.67709e+06	2.18432e+06	708423	715290	487965	581100	795417	427908	829992	665770	887605	613663	628529	522705	770662
6.39	1.67257e+06	2.178e+06	592329	648725	531599	575014	697771	452584	752529	568630	816975	580190	651008	493812	722400
6.37	1.61219e+06	2.08885e+06	529674	634655	452528	530292	727167	332734	684198	500347	819323	520067	522694	426752	636348
6.35	1.60351e+06	2.11794e+06	570852	599829	406227	538301	651910	303914	658626	443912	781046	490059	517204	430146	682815
6.33	1.63486e+06	2.17666e+06	523840	611667	463648	558682	716438	272185	650612	485762	756252	537463	525743	419053	667054
6.31	1.6798e+06	2.23176e+06	493282	662482	580143	506452	727793	419492	708950	478653	796730	515636	479638	464933	669264
6.29	1.76033e+06	2.25917e+06	536795	726058	567969	487615	651965	313550	634898	424102	832883	475350	475250	397271	738403
6.27	2.32648e+06	2.77558e+06	549476	1.60937e+06	1.05413e+06	592327	1.04428e+06	397939	999952	774402	853326	974392	477217	404427	1.27678e+06
6.25	2.93317e+06	3258469	580064	2.5713e+06	1.79622e+06	727293	1.52444e+06	357266	1.45603e+06	1.13339e+06	826264	1.47457e+06	474680	476671	1.86706e+06
6.23	2.35647e+06	2.73984e+06	567119	1.80164e+06	1.28577e+06	616766	1.2292e+06	320846	1.09967e+06	958418	879796	1.1602e+06	470871	513676	1.37501e+06
6.21	1.65153e+06	2.2041e+06	503693	683058	463215	516470	647796	193890	621729	464972	758023	500466	362155	301488	683287
6.19	1.8375e+06	2.3902e+06	694389	742902	341956	614900	723692	167550	592438	581822	902826	632172	521129	415165	860923
6.17	1.97302e+06	2.47371e+06	709287	878407	551670	613055	756683	272405	705154	543342	951098	666557	426923	408645	1.01781e+06
6.15	3.03383e+06	3.39383e+06	901364	2.10638e+06	1.38036e+06	985333	1.38147e+06	395809	1.23572e+06	1.12558e+06	1.11184e+06	1.43006e+06	511240	497890	1.89045e+06
6.13	3.80385e+06	3.84413e+06	2.75266e+06	3.00968e+06	1.78518e+06	3.49534e+06	1.90314e+06	755262	1.57021e+06	2.07749e+06	2.76843e+06	2.32826e+06	699437	936403	2.95209e+06
6.11	2.38934e+06	2.79589e+06	921304	1.75103e+06	1.37468e+06	901844	1.24765e+06	504136	1.14797e+06	858923	1.30743e+06	1196836	526487	592786	1.4984e+06
6.09	2.50145e+06	2.96149e+06	2.07496e+06	1.64789e+06	1.1341e+06	1.43997e+06	1.38628e+06	1.53884e+06	1.21537e+06	998267	2.49555e+06	1.44428e+06	838670	1.4451e+06	1.97453e+06
6.07	2.00132e+06	2.62638e+06	940660	1.06809e+06	974212	932176	1.01196e+06	854336	911781	670963	1.57094e+06	859234	688345	944492	1.12212e+06
6.05	2.08339e+06	2.67391e+06	923373	1.07917e+06	1.13366e+06	906266	1.13953e+06	1.12932e+06	1.08189e+06	624018	1.67424e+06	875080	825135	1.22871e+06	1.16616e+06
6.03	1.89189e+06	2.44741e+06	687050	902724	713428	646584	870774	613875	800670	468374	1.26261e+06	675216	551553	653978	988585
6.01	2.03504e+06	2.64609e+06	777004	1.03929e+06	885285	778906	878204	731824	748473	549920	1.2961e+06	744912	565991	757749	1.0579e+06
5.99	2.59484e+06	3.18307e+06	2.19556e+06	1.439e+06	794689	2.08753e+06	1.08851e+06	841704	1.03613e+06	1.02072e+06	3.09675e+06	1.32189e+06	982765	1.13309e+06	1.63862e+06
5.97	2.62577e+06	3.23023e+06	2.46669e+06	1.66475e+06	1.19557e+06	2.3953e+06	1.29832e+06	1.27183e+06	1.25736e+06	1.07047e+06	3.33417e+06	1.52603e+06	1.21183e+06	1.60072e+06	1.946e+06
5.95	2.49207e+06	3.13814e+06	1.51498e+06	1.53052e+06	1.27105e+06	1.46894e+06	1.34672e+06	1.23783e+06	1.18796e+06	837186	2.27676e+06	1.23795e+06	935306	1.39302e+06	1.60621e+06
5.93	2.48837e+06	3.3055e+06	1.38435e+06	1.60868e+06	2.11301e+06	1.40995e+06	1.77679e+06	1.99358e+06	1.64361e+06	880970	2.44644e+06	1.36548e+06	1.16622e+06	2.05319e+06	1.59537e+06
5.91	2.69376e+06	3.36667e+06	1.7467e+06	1.64946e+06	2.79473e+06	1.56716e+06	1.7202e+06	6.34095e+06	1.73067e+06	946452	2.75477e+06	1.45455e+06	2.54985e+06	4.41778e+06	1.88137e+06
5.89	2.82616e+06	3.56704e+06	2.008e+06	1.83063e+06	3.07329e+06	1.79198e+06	1.99402e+06	6.68666e+06	1.96191e+06	987118	3.17173e+06	1.56891e+06	2.7331e+06	4671614	2.07754e+06
5.87	2.57771e+06	3.25518e+06	1.47533e+06	1.61728e+06	1.82184e+06	1.45842e+06	1.57591e+06	2.61446e+06	1.35374e+06	837718	2.42906e+06	1.32966e+06	1.3956e+06	2.18798e+06	1.69447e+06
5.85	2.77116e+06	3.42701e+06	1.39497e+06	1.89084e+06	1.67739e+06	1.48482e+06	1.57003e+06	1.48814e+06	1.41843e+06	944760	2.20617e+06	1.47564e+06	1.12445e+06	1.595e+06	1.87389e+06
5.83	2.787e+06	3.40309e+06	1.2896e+06	1.93927e+06	1.58046e+06	1.40763e+06	1.52356e+06	1.22706e+06	1.3978e+06	1.02398e+06	2.02659e+06	1.45479e+06	916087	1.38961e+06	1.86853e+06
5.81	3.57274e+06	4.0102e+06	1.56708e+06	3.28211e+06	2.78949e+06	1.74555e+06	2.28187e+06	1.50453e+06	2.14199e+06	1.59099e+06	2.2764e+06	2.30067e+06	1.08848e+06	1.6414e+06	2.67502e+06
5.79	4.11174e+06	4.47995e+06	2.32022e+06	3.60686e+06	5.63838e+06	2.30529e+06	3.31329e+06	4.57291e+06	3.59156e+06	2.31313e+06	3.08552e+06	2.8908e+06	2.3077e+06	3.06163e+06	3.23324e+06
5.77	2.36653e+06	2862363	1.27247e+06	1.52075e+06	1.76966e+06	1.14813e+06	1373118	1.71614e+06	1.40035e+06	872837	1.83708e+06	1.25939e+06	953872	1.31974e+06	1.43697e+06
5.75	2.10515e+06	2.65678e+06	1.02918e+06	1.1709e+06	1.0024e+06	953623	1.0566e+06	912546	981604	699769	1.54085e+06	1.0324e+06	636096	837805	1.25694e+06
5.73	2.01847e+06	2.60337e+06	983398	1.07022e+06	861272	828072	977180	655992	835743	724020	1.39372e+06	915701	557447	717659	1.10744e+06
5.71	1.98543e+06	2.5198e+06	836106	986686	643598	750364	771606	466775	784625	636494	1.24487e+06	807030	382094	513069	1.06935e+06
5.69	2.15037e+06	2.62808e+06	1.20434e+06	1.13808e+06	786935	827774	908006	448455	985975	815770	1.26105e+06	1.14804e+06	416249	411312	1.36024e+06
5.67	1.83059e+06	2.48218e+06	739792	740567	520005	596797	662568	282036	632140	473448	956268	604421	278473	297898	839837
5.65	1.85974e+06	2.50326e+06	792933	755111	507082	599661	651152	326091	676492	470597	946069	586573	303404	343832	857922
5.63	2.08151e+06	2.72652e+06	816690	931612	628818	674885	773612	424757	764839	552348	1.19983e+06	731569	442901	449007	1.09754e+06
5.61	3.8292e+06	4.67873e+06	2.33673e+06	3.03208e+06	2.99433e+06	2.1022e+06	2.83467e+06	2.39784e+06	2.62693e+06	2.09804e+06	2.64174e+06	2.64995e+06	1.87461e+06	2.41392e+06	3.25465e+06
5.59	1.80642e+06	2.27133e+06	589707	761135	438876	529729	593423	172024	632145	477751	783342	624932	265428	201420	755420
5.57	1.83496e+06	2.30747e+06	512225	577378	400500	357679	556881	142409	513561	487547	706495	486239	164190	180237	689851
5.55	1.78368e+06	2.40403e+06	620288	661502	319954	442671	574611	98899.7	512503	377912	764517	496245	209869	94764.9	774438
5.53	1.80998e+06	2.4146e+06	564018	688816	390005	467507	585967	79175.1	545876	435277	787959	500965	174267	130545	759242
5.51	1.85093e+06	2.43991e+06	665497	691244	326999	600284	586102	77065	566570	398691	765107	474927	126791	108574	820241
5.49	1.83003e+06	2.542e+06	534591	741412	427801	542753	613541	95341.7	628055	526614	744425	439501	315638	145937	803082
5.47	1.95774e+06	2.63264e+06	625721	704233	633942	493049	680187	225620	694494	467654	734549	503472	245940	258307	802156
5.45	2.06901e+06	2.76126e+06	691315	711544	776438	589055	770938	384039	795926	525143	837302	554187	326554	299381	844643
5.43	2.60665e+06	3.26118e+06	1.11916e+06	1.18475e+06	1.3202e+06	920458	1.26979e+06	924518	1.26293e+06	924498	1.21792e+06	885731	572324	789261	1.34538e+06
5.41	6.02614e+06	6.10368e+06	4.26324e+06	5.60817e+06	9.86445e+06	3.49178e+06	6.37878e+06	4.5371e+06	5.34033e+06	3248982	3.5851e+06	4.98433e+06	2.28574e+06	4.35988e+06	4.10769e+06
5.39	4.01282e+06	4.28378e+06	2.94435e+06	2.90235e+06	4.50544e+06	2.45526e+06	3.53352e+06	3.15804e+06	3.47795e+06	2.48749e+06	2.51989e+06	2.46429e+06	1.95125e+06	2.83794e+06	3.10172e+06
5.37	3.95526e+06	4.39323e+06	3.2768e+06	2.75171e+06	3.73954e+06	2.60442e+06	3.43008e+06	3172296	3.36248e+06	2.63284e+06	2.71819e+06	2.50114e+06	1.96611e+06	2.94418e+06	3.20593e+06
5.35	3.28478e+06	3.8941e+06	2.87744e+06	2.1478e+06	2.66491e+06	2.32975e+06	2.62826e+06	2.45242e+06	2.52115e+06	2.19298e+06	2.3911e+06	1.89877e+06	1.7114e+06	2.33611e+06	2.6606e+06
5.33	2.82776e+06	3.41086e+06	2.44777e+06	1.59867e+06	1.67725e+06	1.91989e+06	1.82135e+06	1.59193e+06	1.79017e+06	1.77822e+06	2.319e+06	1.34585e+06	1.52685e+06	1.55527e+06	2.02365e+06
5.31	2.58035e+06	3.22345e+06	2.31896e+06	1.22373e+06	900386	1.97556e+06	1.38103e+06	960160	1.15581e+06	1438924	2.33835e+06	1.03253e+06	1.70324e+06	1.22948e+06	1.59023e+06
5.29	2.37189e+06	3.12671e+06	1.72622e+06	874892	627582	1.35342e+06	1.06161e+06	480956	999322	1.09421e+06	1.73022e+06	795682	1.32823e+06	834288	1.20498e+06
5.27	2.35617e+06	3.17211e+06	1.53099e+06	812907	464672	1.1038e+06	913894	256598	896187	969097	1.43967e+06	697135	1.1395e+06	742848	1.08184e+06
5.25	3.29586e+06	4.17516e+06	2.55401e+06	1.72598e+06	925840	1.78628e+06	1.73215e+06	784696	1.79926e+06	1.60477e+06	3.58202e+06	1.94681e+06	1.63838e+06	1.23272e+06	2.25986e+06
5.23	6.14753e+06	6.97714e+06	7.47744e+06	4.47174e+06	6.14022e+06	6.42621e+06	6.2502e+06	6.449e+06	6.32177e+06	4.98673e+06	7.0848e+06	5.05247e+06	6.64948e+06	7.01647e+06	5.90355e+06
5.21	2.41584e+06	2.9041e+06	1.81859e+06	1.27599e+06	1.18844e+06	1.71368e+06	1.4603e+06	1.1828e+06	1.74508e+06	1.37339e+06	2.0624e+06	1.22983e+06	1.82285e+06	1.42964e+06	1.42498e+06
5.19	2.02749e+06	2.77484e+06	1.35777e+06	708118	525408	785901	1.04718e+06	1.03115e+06	1.06751e+06	715727	1.9533e+06	666894	1.1293e+06	887096	863587
5.17	1.86638e+06	2.47269e+06	522337	533679	329550	479876	595989	293823	635504	381268	903791	433882	468934	339205	644020
5.15	1.79653e+06	2.4426e+06	428297	418818	308974	261015	534202	130164	471183	381109	677461	325335	332546	195245	592183
5.13	1.79657e+06	2.52772e+06	319693	489050	258552	254717	548713	133849	492718	337533	596501	295838	246027	188856	543507
5.11	1.77031e+06	2.49769e+06	301661	469819	340510	230823	485798	82018.1	564962	324800	592952	267588	216397	152451	572892
5.09	1.84e+06	2.51131e+06	187722	408299	275433	174140	500758	-31288.1	463884	251883	539232	201084	158400	-1114.9	474910
5.07	1.71883e+06	2.45575e+06	211269	369251	133270	143403	384328	-166630	375597	182433	453688	133546	-39810.2	-95740.2	462414
5.05	1.66531e+06	2.49353e+06	161554	266749	15319.9	95123.8	324125	-194522	351194	164594	455641	48127.8	-33802.2	-117348	387325
5.03	1.64929e+06	2.45824e+06	86213.3	193226	-52071.4	40774.1	270532	-240962	269200	163730	427166	-14158.5	-125627	-146312	360107
5.01	1.66762e+06	2.48337e+06	47061.6	165423	-100212	52723.5	329259	-230690	247061	45544.2	421803	-34264.8	-196339	-190410	363735
4.59	2.74372e+06	3.79056e+06	663234	881745	387488	536063	901233	39277.1	895392	564132	1.28074e+06	567445	223390	129610	1.06263e+06
4.57	2.92578e+06	3.93105e+06	754140	986336	482990	626446	984518	122650	999652	633600	1.38997e+06	745314	301514	167779	1.15843e+06
4.55	2.93517e+06	4.0629e+06	896627	1.01181e+06	498104	779234	992559	217465	1.0144e+06	612316	1.49067e+06	663820	459677	334866	1.19398e+06
4.53	3.14239e+06	4.32952e+06	992498	1.15932e+06	672779	944100	1.14122e+06	350447	1.14997e+06	714972	1.65535e+06	786695	517413	440588	1.31659e+06
4.51	3.50343e+06	4.63592e+06	1.31918e+06	1.4056e+06	859931	1.25012e+06	1.3273e+06	578477	1.36022e+06	983680	1.98414e+06	1.13755e+06	620802	644510	1.70754e+06
4.49	3.91653e+06	5.03532e+06	1.77166e+06	1.90182e+06	1.20248e+06	1.6757e+06	1.67769e+06	828225	1.61778e+06	1.24483e+06	2.3849e+06	1.42144e+06	966198	933663	2.1399e+06
4.47	4.00448e+06	5.23343e+06	1.73775e+06	2.01797e+06	1.32921e+06	1.59928e+06	1.83504e+06	966712	1.86647e+06	1.34603e+06	2.50227e+06	1.57239e+06	1.1746e+06	1.04939e+06	2.14978e+06
4.45	4.27313e+06	5.44619e+06	1.95434e+06	2.21738e+06	1.49992e+06	1710267	2.00918e+06	1.0733e+06	2.03165e+06	1.47511e+06	2.68938e+06	1.66245e+06	1.26378e+06	1.23014e+06	2.29764e+06
4.43	5.01727e+06	6.18649e+06	2.6885e+06	2.91736e+06	2.07e+06	2.30653e+06	2.67942e+06	1.49558e+06	2.63041e+06	2.0384e+06	3.42415e+06	2.39135e+06	1.70416e+06	1.6421e+06	3.13597e+06
4.41	5.26759e+06	6.56024e+06	3.08062e+06	3.1543e+06	2.35736e+06	2.73523e+06	2.86261e+06	1.80095e+06	2.88238e+06	2.26297e+06	3.98288e+06	2.6626e+06	2.00146e+06	2.04037e+06	3.32382e+06
4.39	5.32263e+06	6.57124e+06	3.01759e+06	3.12653e+06	2.27318e+06	2.64077e+06	2.9004e+06	1.78143e+06	2.91644e+06	2.20185e+06	3.79305e+06	2.52637e+06	2.0108e+06	2.07325e+06	3.27249e+06
4.37	5.89809e+06	7.21419e+06	3.75622e+06	3.60243e+06	2.53491e+06	3.54253e+06	3.21926e+06	1.9528e+06	3.15449e+06	2.67418e+06	4.4693e+06	3.02659e+06	2.30391e+06	2.24913e+06	3.95561e+06
4.35	6.77758e+06	7.99125e+06	4.70685e+06	4.32972e+06	3.4783e+06	4.39624e+06	3.96714e+06	4.00791e+06	3.87789e+06	3.25124e+06	5.6748e+06	3.73369e+06	3.30932e+06	3.72947e+06	4.69402e+06
4.33	7.40652e+06	8.68981e+06	4.83764e+06	4.75938e+06	3.95483e+06	4.39216e+06	4.57648e+06	3.55972e+06	4.44905e+06	3.755e+06	5.80809e+06	4.14068e+06	3.61063e+06	3.6518e+06	5.13984e+06
4.31	8.98951e+06	9.97086e+06	5.60604e+06	6.30475e+06	5.2086e+06	5.04198e+06	6.04969e+06	3.27433e+06	5.80975e+06	4.92931e+06	6.93144e+06	5.39971e+06	3.9602e+06	3.93165e+06	6.7655e+06
4.29	1.02133e+07	1.05682e+07	8.48398e+06	7.84191e+06	6.68728e+06	7.44832e+06	8.37598e+06	4.30036e+06	7.3984e+06	6.56724e+06	9.26028e+06	6.64593e+06	4.75231e+06	5.1745e+06	8.04235e+06
4.27	9.4149e+06	1.04907e+07	6.83023e+06	6.9048e+06	5.72528e+06	6.18828e+06	6.63855e+06	4.56637e+06	6.36432e+06	5.30599e+06	7.8837e+06	6.0139e+06	4.79533e+06	4.96324e+06	7.1602e+06
4.25	1.13678e+07	1.26801e+07	9.22342e+06	9.04949e+06	1.00418e+07	8.59652e+06	9.01207e+06	9.82485e+06	9.73925e+06	7.07762e+06	1.12011e+07	7.63751e+06	7.81231e+06	8.72916e+06	9.25908e+06
4.23	1.08755e+07	1.20503e+07	8.34188e+06	8.60158e+06	9.69925e+06	7.71523e+06	8.6026e+06	1.0495e+07	9.44184e+06	6.65261e+06	9.85518e+06	7.27704e+06	7.76436e+06	8.87173e+06	8.60835e+06
4.21	1.02767e+07	1.16181e+07	6.57871e+06	7.68022e+06	7.71185e+06	6.03842e+06	7.36088e+06	7.28868e+06	7.65194e+06	5.58398e+06	8.1054e+06	6.50181e+06	5.77562e+06	6.47764e+06	7.86611e+06
4.19	1.051e+07	1.19581e+07	6.90829e+06	7.76704e+06	7.18034e+06	6.4002e+06	7.13127e+06	5.61627e+06	7.29991e+06	5.57988e+06	8.23093e+06	6.46801e+06	5.38435e+06	5.48734e+06	7.96259e+06
4.17	1.93427e+07	2.04968e+07	1.64393e+07	1.63863e+07	1.2357e+07	1.56149e+07	1.4741e+07	9.25898e+06	1.52965e+07	1.35805e+07	1.70103e+07	1.43243e+07	1.13208e+07	1.2305e+07	1.6944e+07
4.15	1.8572e+07	1.93326e+07	1.55241e+07	1.60242e+07	1.16047e+07	1.48804e+07	1.42226e+07	9.01455e+06	1.53522e+07	1.32481e+07	1.60236e+07	1.42889e+07	1.10196e+07	1.17841e+07	1.56799e+07
4.13	2.30704e+07	2.25295e+07	1.66782e+07	2.18265e+07	2.87871e+07	1.47592e+07	1.88111e+07	2.48046e+07	2.08043e+07	1.52627e+07	1.76876e+07	1.57303e+07	18019091	1.97828e+07	2.00882e+07
4.11	1.76532e+07	1.85604e+07	1.23888e+07	1.58468e+07	1.9145e+07	1.16569e+07	1.45097e+07	1.66291e+07	1.64001e+07	1.25073e+07	1.38632e+07	1.25887e+07	1.26004e+07	1.3247e+07	1.47978e+07
4.09	1.58189e+07	1.74484e+07	1.16524e+07	1.36955e+07	1.3442e+07	1.12302e+07	1.32377e+07	1.12062e+07	1.39061e+07	1.08167e+07	1.36929e+07	1.16191e+07	1.21438e+07	1.18547e+07	1.4042e+07
4.07	1.81013e+07	1.95011e+07	1.4715e+07	1.67943e+07	1.7513e+07	1.40985e+07	1.47489e+07	1.61222e+07	1.52988e+07	1.20887e+07	1.66249e+07	1.35943e+07	1.33306e+07	1.44046e+07	1.64149e+07
4.05	2.7066e+07	2.95575e+07	2.73148e+07	2.91853e+07	3.59142e+07	2.53596e+07	2.70939e+07	4.03378e+07	3.04344e+07	2.21863e+07	28807924	2.5184e+07	2.91024e+07	3.24363e+07	2.75491e+07
4.03	2.34307e+07	2.45636e+07	1.78128e+07	2.07482e+07	2.36314e+07	1.67341e+07	2.0694e+07	2.11358e+07	2.28327e+07	1.62852e+07	1.9251e+07	1.77016e+07	1.82552e+07	1.78686e+07	2.09942e+07
4.01	2.70202e+07	2.80154e+07	2.23459e+07	2.2697e+07	2.57148e+07	2.27265e+07	2.46285e+07	2.92044e+07	2.80472e+07	2.10712e+07	2.33009e+07	2.00334e+07	2.63103e+07	2.5122e+07	2.35476e+07
3.99	4.56575e+07	4.78043e+07	4.49718e+07	4.39454e+07	5.02679e+07	4.50981e+07	4.56703e+07	5.42224e+07	5.7023e+07	4.09516e+07	4.8666e+07	4.10542e+07	4.25936e+07	4.8084e+07	4.42743e+07
3.97	4.14988e+07	4.47818e+07	4.13728e+07	4.52476e+07	5.51434e+07	41774358	4.69044e+07	5.44261e+07	5.53256e+07	3.80513e+07	4.24245e+07	4.03166e+07	3.62658e+07	4.40304e+07	4.20039e+07
3.95	3.6609e+07	4.11344e+07	3.57311e+07	4.00132e+07	5.04664e+07	3.51599e+07	4.14941e+07	4.93433e+07	4.78225e+07	3.26716e+07	3.83948e+07	3.44712e+07	3.27768e+07	3.92885e+07	3.64279e+07
3.93	3.34739e+07	3.62774e+07	3.31516e+07	3.43531e+07	4.55492e+07	3.34124e+07	3.76175e+07	5.03886e+07	4.60947e+07	2.97489e+07	3.73856e+07	3.10155e+07	3.07188e+07	3.68968e+07	3.20277e+07
3.91	3.25675e+07	3.24792e+07	29226966	2.90741e+07	3.90216e+07	2.497e+07	3.23086e+07	3.6479e+07	3.47154e+07	2.47715e+07	3.02673e+07	2.63012e+07	2.55763e+07	3.09942e+07	2.91748e+07
3.89	5.0259e+07	5.11906e+07	5.77914e+07	4.48318e+07	6.55958e+07	5.19708e+07	5.90035e+07	7.12334e+07	6.14743e+07	4.59877e+07	5.30384e+07	4.30318e+07	5.73299e+07	6.57791e+07	5.17517e+07
3.87	5.16604e+07	5.15456e+07	5.52583e+07	4.78786e+07	6.46285e+07	5.01818e+07	5.84905e+07	6.13903e+07	6.2476e+07	4.66791e+07	5.17789e+07	4.39759e+07	4.99908e+07	5.85913e+07	5.15021e+07
3.85	6.47139e+07	6.48136e+07	6.42846e+07	6.56602e+07	8.50445e+07	5.98725e+07	7.1317e+07	7.29129e+07	7.54498e+07	5.41486e+07	6.43754e+07	5.59607e+07	5.57048e+07	7.03876e+07	6.38213e+07
3.83	8.70877e+07	8.93725e+07	9.67887e+07	9.26438e+07	1.23421e+08	9.37532e+07	1.03461e+08	1.1438e+08	1.14115e+08	8.29057e+07	9.17328e+07	8.16378e+07	9.56518e+07	1.10104e+08	9.59501e+07
3.81	5.50689e+07	5.10647e+07	5.22213e+07	5.88731e+07	7.10697e+07	5.3086e+07	5.8055e+07	6.82318e+07	6.63914e+07	4.90171e+07	5.13136e+07	5.05812e+07	5.84736e+07	6.12357e+07	5.75008e+07
3.79	5.20714e+07	4.99755e+07	3.68064e+07	5.14313e+07	5.85327e+07	3.86858e+07	4.88641e+07	4.73349e+07	5.45471e+07	4.04331e+07	4.10801e+07	4.20901e+07	3.72502e+07	4.4454e+07	4.78449e+07
3.77	1.00617e+08	9.50339e+07	1.08597e+08	1.07433e+08	1.49015e+08	1.1136e+08	1.10533e+08	1.54609e+08	1.2039e+08	8.31404e+07	1.04445e+08	8.71904e+07	9.58343e+07	1.26217e+08	1.01925e+08
3.75	7.96337e+07	7.40993e+07	8.71149e+07	8.75303e+07	1.27346e+08	8.6035e+07	9.31345e+07	1.33792e+08	1.0881e+08	7.01197e+07	8.40715e+07	7.35759e+07	8.34336e+07	1.01693e+08	8.48078e+07
3.73	5.89033e+07	5.54341e+07	6.28719e+07	5.82957e+07	9.17755e+07	5.85304e+07	6.86487e+07	9.31024e+07	8.17906e+07	5.33038e+07	6.14855e+07	5.54776e+07	6.17725e+07	7.53028e+07	6.04298e+07
3.71	6.55813e+07	6.42434e+07	7.36128e+07	6.31898e+07	9.81806e+07	7.00943e+07	8.14704e+07	9.14424e+07	8.95932e+07	6.44396e+07	6.3918e+07	6.26285e+07	7.60148e+07	8.51733e+07	7.0097e+07
3.69	4.46572e+07	4.28212e+07	3.87154e+07	4.54284e+07	6.01704e+07	3.90395e+07	4.96242e+07	4.6781e+07	5.52325e+07	4.02857e+07	3.68072e+07	4.15106e+07	3.93832e+07	4.4852e+07	4.37811e+07
3.67	5.36588e+07	5.32965e+07	4.95852e+07	5.56602e+07	7.45008e+07	4.99757e+07	5.94296e+07	6.40466e+07	6.70667e+07	4.96043e+07	4.77266e+07	4.85416e+07	4.70062e+07	5.87458e+07	5.34595e+07
3.65	5.9497e+07	5.83888e+07	5.21937e+07	6.55469e+07	9.2632e+07	5.21263e+07	6.82277e+07	8.91801e+07	7.63462e+07	4.95819e+07	4.65829e+07	5.61376e+07	5.93861e+07	6.95303e+07	5.98896e+07
3.63	5.4765e+07	5.38426e+07	4.90247e+07	6.27977e+07	8.60679e+07	5.19286e+07	6.40233e+07	8.66544e+07	7.20897e+07	4.74522e+07	4.38706e+07	5.38278e+07	6.02968e+07	6.82536e+07	5.70417e+07
3.61	4.83249e+07	4.65398e+07	4.82339e+07	5.16256e+07	6.67626e+07	4.94361e+07	5.31856e+07	6.27123e+07	6.21014e+07	4.36566e+07	4.6807e+07	4.32362e+07	4.31235e+07	5.82633e+07	4.92516e+07
3.59	7.2013e+07	6.78611e+07	7.47512e+07	7.78469e+07	8.21931e+07	7.32633e+07	7.58168e+07	6.56309e+07	8.38243e+07	6.48285e+07	6.94443e+07	6.91684e+07	5.57081e+07	7.1418e+07	7.19821e+07
3.57	3.76294e+07	3.64204e+07	3.28872e+07	4.40334e+07	6.55758e+07	3.31712e+07	4.42332e+07	5.69045e+07	5.04346e+07	3.14948e+07	3.35412e+07	3.69479e+07	3.78501e+07	4.49483e+07	3.68136e+07
3.55	6.39102e+07	7.23341e+07	5.48147e+07	7.61747e+07	1.56028e+08	5.67877e+07	8.28814e+07	131837421	9.51836e+07	5.63236e+07	5.44077e+07	5.91277e+07	7.02311e+07	8.5117e+07	6.3436e+07
3.53	3.685e+07	3.62537e+07	4.42136e+07	4.20973e+07	6.29248e+07	4.3479e+07	4.54773e+07	7.03725e+07	5.19744e+07	3.71024e+07	4.39645e+07	3.73502e+07	5.56926e+07	5.86139e+07	4.33939e+07
3.51	3.42711e+07	3.29883e+07	4.50107e+07	4.36312e+07	6.21301e+07	4.20413e+07	4.25102e+07	7.24491e+07	4.94456e+07	3.6426e+07	4.49493e+07	3.93711e+07	5.45878e+07	5.76851e+07	4.16126e+07
3.49	2.78685e+07	2.69321e+07	3.95527e+07	2.70298e+07	4.19129e+07	3.66944e+07	3.541e+07	4.88617e+07	3.94419e+07	2.93117e+07	3.9457e+07	2.65947e+07	4.2913e+07	4.6198e+07	3.39932e+07
3.47	3.39787e+07	3.35906e+07	5.04054e+07	3.09977e+07	4.98082e+07	4.59325e+07	4.48797e+07	5.82708e+07	5.00184e+07	3.76426e+07	4.67916e+07	3.25008e+07	5.34198e+07	5.67828e+07	4.16247e+07
3.45	3.2415e+07	3.16346e+07	5.04413e+07	2.99191e+07	4.82259e+07	4.56376e+07	4.42238e+07	5.91207e+07	4.96065e+07	3.68702e+07	4.66842e+07	3.17183e+07	5.37583e+07	5.64386e+07	3.94407e+07
3.43	1.95027e+07	1.68345e+07	1.92829e+07	1.97986e+07	3.12507e+07	1.70717e+07	2.12284e+07	2.92207e+07	2.36624e+07	1.55099e+07	1.94095e+07	1.67475e+07	2.00654e+07	2.28763e+07	1.83579e+07
3.41	5.158e+07	4.84271e+07	6.25096e+07	5.28767e+07	8.74937e+07	5.7989e+07	6.21601e+07	8.92792e+07	6.72601e+07	4.86772e+07	5.30345e+07	4.52864e+07	6.81728e+07	7.83312e+07	5.53576e+07
3.39	35496752	3.24982e+07	4.90228e+07	3.51568e+07	5.59616e+07	4.67132e+07	4.47242e+07	6.28445e+07	5.11394e+07	3.79111e+07	4.27428e+07	3.33178e+07	5.5879e+07	5.82965e+07	4.19302e+07
3.37	1.05684e+07	9.15834e+06	1.24305e+07	1.04535e+07	1.49748e+07	1.22097e+07	1.25958e+07	1.56265e+07	1.50035e+07	1.13306e+07	1.23396e+07	1.07734e+07	1.44374e+07	1.37864e+07	11619920
3.35	1.25605e+07	1.11069e+07	1.05695e+07	1.24542e+07	1.82418e+07	9.99503e+06	1.16158e+07	1.78446e+07	1.3367e+07	9.61315e+06	1.15888e+07	9.68073e+06	1.22025e+07	1.37923e+07	1.14672e+07
3.33	2.84817e+07	2.50897e+07	2.54296e+07	3.10425e+07	4.74105e+07	2.46245e+07	2.74195e+07	4.87065e+07	3.33059e+07	2.28672e+07	2.36659e+07	2.20745e+07	3.15078e+07	3.63407e+07	2.60723e+07
3.31	1.65971e+07	1.53541e+07	1.51578e+07	1.71098e+07	2.32985e+07	1.47763e+07	1.57947e+07	2.31152e+07	1.99529e+07	1.36167e+07	1.49464e+07	1.38846e+07	1.58259e+07	1.76068e+07	1.52385e+07
3.29	1.67407e+07	1.79151e+07	1.63695e+07	1.60876e+07	2.23086e+07	1.56598e+07	1.77618e+07	2.62749e+07	2.24036e+07	1.47228e+07	1.78699e+07	1.48046e+07	1.66438e+07	1.95064e+07	1.62683e+07
3.27	2.88962e+07	2.82485e+07	2.99385e+07	2.66966e+07	3.58571e+07	3.00553e+07	2.9851e+07	4.22775e+07	3.58699e+07	2.63798e+07	3.24887e+07	2.53005e+07	2.95404e+07	3.42485e+07	2.70588e+07
3.25	4.30123e+07	4.24915e+07	5.22823e+07	3.98154e+07	4.7601e+07	5.81812e+07	4.48326e+07	6.56708e+07	5.01087e+07	3.78917e+07	5.45551e+07	3.73628e+07	5.17465e+07	5.95383e+07	4.33528e+07
3.23	6.98208e+07	7.57126e+07	9.27953e+07	6.07811e+07	7.11938e+07	1.10414e+08	7.31527e+07	1.07219e+08	7.75165e+07	6.79516e+07	9.04269e+07	6.03654e+07	8.47694e+07	1.00053e+08	7.02835e+07
3.21	1.89058e+08	1.7973e+08	2.23253e+08	1.91564e+08	1.00782e+08	2.27817e+08	1.64998e+08	9.42606e+07	1.77247e+08	1.75791e+08	2.0683e+08	1.79131e+08	1.44179e+08	1.5893e+08	1.94553e+08
3.19	135309780	1.351e+08	2.05091e+08	1.8931e+08	248312180	1.97801e+08	1.72253e+08	3.47916e+08	1.99846e+08	1.51101e+08	2.19378e+08	172393551	2.62038e+08	2.72307e+08	1.69833e+08
3.17	2.07759e+07	1.31263e+07	3.46226e+07	2.27646e+07	2.85304e+07	3.6516e+07	2.3975e+07	4.67114e+07	3.40279e+07	2.4085e+07	4.60303e+07	2.54576e+07	3.15017e+07	3.51839e+07	2.21351e+07
3.15	1.43421e+07	1.02734e+07	1.99309e+07	1.54967e+07	1.92517e+07	1.99525e+07	1.6036e+07	2.79625e+07	2.00613e+07	1.56002e+07	2.49579e+07	1.65545e+07	1.96203e+07	2.22973e+07	1.52453e+07
3.13	2.16054e+07	2.1151e+07	3.08024e+07	2.80583e+07	3.55579e+07	2.90556e+07	2.793e+07	5.49825e+07	3.54055e+07	2.5603e+07	3.24771e+07	2.62963e+07	3.61557e+07	4.15701e+07	2.77964e+07
3.11	1.52644e+07	1.36859e+07	2.03584e+07	1.7758e+07	2.22628e+07	1.88315e+07	1.79367e+07	3.02244e+07	2.36318e+07	1.70071e+07	2.11928e+07	1.80434e+07	1.87078e+07	22208831	1.84433e+07
3.09	1.00548e+07	8.71838e+06	1.30798e+07	1.13168e+07	1.21877e+07	1.24613e+07	1.05563e+07	1.66613e+07	1.24113e+07	1.0013e+07	1.45481e+07	1.1377e+07	1.24509e+07	1.34492e+07	11722161
3.07	1.38776e+07	1.3116e+07	1.70808e+07	1.34423e+07	1.53869e+07	1.77056e+07	1.40617e+07	2.23737e+07	1.77429e+07	1.29246e+07	1.9911e+07	1.37108e+07	1.55998e+07	1.78335e+07	1.5576e+07
3.05	4.7285e+07	4.47604e+07	5.78831e+07	4.13222e+07	4.18673e+07	6.36883e+07	4.68686e+07	7.27701e+07	5.83673e+07	4.69458e+07	6.36501e+07	4.73104e+07	5.15868e+07	6.05793e+07	5.34338e+07
3.03	6.23333e+07	5.8544e+07	8.92762e+07	6.08572e+07	65422199	9.71299e+07	6.82293e+07	1.07032e+08	8.47048e+07	6.6415e+07	8.98488e+07	6.91874e+07	7.37692e+07	9.01851e+07	7.65852e+07
3.01	5.5214e+07	5.1962e+07	8.55527e+07	6.38474e+07	8.2353e+07	8.85345e+07	7.02487e+07	1.21078e+08	8.89665e+07	5.89454e+07	8.70792e+07	5.5067e+07	7.08357e+07	9.33348e+07	7.09152e+07
2.99	3.16391e+07	2.71566e+07	4.41647e+07	3.50258e+07	3.49165e+07	4.05319e+07	3.28991e+07	3.14905e+07	3.90624e+07	3.2282e+07	4.19789e+07	3.39242e+07	3.26624e+07	3.32709e+07	3.61593e+07
2.97	1.36692e+07	1.10654e+07	1.87986e+07	1.48643e+07	1.29281e+07	1.74553e+07	1.32577e+07	1.31376e+07	1.46106e+07	1.37814e+07	1.9135e+07	1.5507e+07	1.64057e+07	1.48297e+07	1.54544e+07
2.95	1.08085e+07	9.16688e+06	1.47294e+07	1.11188e+07	9.16714e+06	1.39401e+07	9.9512e+06	9.93644e+06	1.2974e+07	1.1095e+07	1.44849e+07	1.2229e+07	1.29436e+07	1.23085e+07	1.19072e+07
2.93	1.15599e+07	1.06315e+07	1.61892e+07	1.11168e+07	8.5994e+06	1.55891e+07	1.03036e+07	1.03641e+07	1.53578e+07	1.21211e+07	1.55652e+07	1.26778e+07	1.36916e+07	1.37695e+07	1.23965e+07
2.91	6.14695e+06	4.92873e+06	8.11561e+06	7.05555e+06	6.95693e+06	7.65702e+06	6.74885e+06	6.99377e+06	7.51728e+06	6.59802e+06	7.92646e+06	7.32068e+06	8.25746e+06	7.6157e+06	7.04521e+06
2.89	5.79644e+06	4.93893e+06	7.58127e+06	6.56045e+06	6.29568e+06	6.93513e+06	6.22023e+06	6.00137e+06	6.85523e+06	6.039e+06	7.23949e+06	6.77173e+06	7.30247e+06	6.90265e+06	6.61091e+06
2.87	1.00022e+07	1.0047e+07	1.53518e+07	9.71723e+06	7.13018e+06	1.49686e+07	9.3937e+06	8.72496e+06	1.42711e+07	1.07545e+07	1.47883e+07	1.09842e+07	1.19799e+07	1.23897e+07	1.1141e+07
2.85	8.23789e+06	7.78778e+06	1.32744e+07	8.25465e+06	6.86811e+06	1.27706e+07	8.26268e+06	8.19494e+06	1.14539e+07	8.87547e+06	1.34089e+07	9.1497e+06	1.04732e+07	1.06407e+07	9.35909e+06
2.83	6.09212e+06	5.24186e+06	8.21962e+06	6.35213e+06	5.76799e+06	7.53531e+06	5.98099e+06	6.36914e+06	7.37404e+06	6.44626e+06	7.69076e+06	6833031	7.1844e+06	6.87488e+06	6.88476e+06
2.81	6.02091e+06	5.26109e+06	7.5248e+06	6.43491e+06	5.77628e+06	6.80024e+06	5.95549e+06	6.60206e+06	6.41925e+06	6.0694e+06	7.05078e+06	6.56861e+06	6.6992e+06	6.43183e+06	6.8571e+06
2.79	6.49302e+06	5.7256e+06	7.93954e+06	6.66733e+06	5.85633e+06	6.86213e+06	5.97957e+06	6.28959e+06	6.18771e+06	6.22875e+06	7.15911e+06	6.67847e+06	6.75864e+06	6.29302e+06	7.31003e+06
2.77	7.40145e+06	6.48704e+06	9.14012e+06	7.1585e+06	6.1037e+06	7.55844e+06	6.30461e+06	5.46867e+06	6.45469e+06	6.64898e+06	8.02776e+06	7.30386e+06	7.03211e+06	6.28804e+06	8.20071e+06
2.75	1.39135e+07	1.05084e+07	1.34479e+07	1.03643e+07	1.12179e+07	1.19704e+07	1.30923e+07	1.04748e+07	1.02309e+07	1.15476e+07	1.45765e+07	1.10816e+07	15626249	1.22802e+07	1.10716e+07
2.73	1.10383e+07	8.91309e+06	1.35249e+07	1.11639e+07	8.91253e+06	9.89014e+06	9.0506e+06	6.07422e+06	9.60342e+06	9.44981e+06	1.11267e+07	1.10572e+07	9.28057e+06	7.68517e+06	1.31796e+07
2.71	1.26658e+07	9.48668e+06	2.32968e+07	1.25523e+07	1.00371e+07	1.47073e+07	1.08781e+07	5.68652e+06	1.18028e+07	1.23516e+07	1.38216e+07	1.43365e+07	9.19688e+06	7.71143e+06	1.7191e+07
2.69	1.2437e+07	8.71559e+06	2.86665e+07	1.23767e+07	1.03919e+07	1.81959e+07	1.10565e+07	6.00094e+06	1.20896e+07	1.43011e+07	1.36116e+07	1.57466e+07	8.13302e+06	7.16024e+06	1.77387e+07
2.67	1.07449e+07	7.60679e+06	2.38112e+07	1.04365e+07	9.07995e+06	1.70128e+07	9.35967e+06	5.40129e+06	1.03465e+07	1.27102e+07	1.07186e+07	1.3728e+07	6.92046e+06	6.35974e+06	1.41197e+07
2.65	9.62302e+06	8.18588e+06	1.28466e+07	9.66239e+06	1.01767e+07	9.43392e+06	8.36257e+06	9.91815e+06	9.86737e+06	9.05124e+06	9.76694e+06	1.09183e+07	7.77721e+06	8.30389e+06	1.12861e+07
2.63	9.69535e+06	9.41678e+06	1.27107e+07	1.03397e+07	1.28664e+07	1.05076e+07	9.42961e+06	1.22053e+07	1.18934e+07	9.05561e+06	1.11309e+07	1.05513e+07	9.72551e+06	1.04424e+07	1.14285e+07
2.61	8.02474e+06	6.77626e+06	8.40038e+06	8.21666e+06	8.02605e+06	6.76098e+06	6.82445e+06	6.81647e+06	8.09186e+06	6.60423e+06	7.46296e+06	8.36512e+06	6.24834e+06	6.45252e+06	9.24488e+06
2.59	8.50952e+06	6.70829e+06	8.36519e+06	8.69467e+06	7.11945e+06	6.02965e+06	6.47846e+06	4.85244e+06	7.18102e+06	6.58862e+06	7.23047e+06	8.98333e+06	5.40254e+06	5.19187e+06	1.08265e+07
2.57	1.09521e+07	7.61278e+06	2.07911e+07	1.11709e+07	8.97431e+06	1.02477e+07	8.68087e+06	4.76992e+06	9.83371e+06	1.05922e+07	1.15965e+07	1.30347e+07	5.38403e+06	5.20439e+06	1.64261e+07
2.55	1.41208e+07	9.12309e+06	3.1963e+07	1.38438e+07	1.11779e+07	2.15268e+07	1.1858e+07	6.66594e+06	1.4104e+07	1.55518e+07	1.74505e+07	1.80223e+07	6.58272e+06	6.51859e+06	2.08725e+07
2.53	1.18274e+07	8.19937e+06	2.80743e+07	1.1207e+07	9.72108e+06	2.2472e+07	1.17335e+07	5.88246e+06	1.46293e+07	1.62682e+07	1.35254e+07	1.55138e+07	6.18691e+06	5.91149e+06	1.67861e+07
2.51	8.56087e+06	6.99621e+06	9.85602e+06	7.98328e+06	7.71349e+06	7.75356e+06	7.3193e+06	6.60638e+06	9.10547e+06	8.39675e+06	7.80006e+06	9.88517e+06	6.02214e+06	5.77789e+06	1.05766e+07
2.49	8.43835e+06	7.26952e+06	8.89534e+06	8.0058e+06	9.03797e+06	7.77929e+06	7.40108e+06	9.36326e+06	8.3317e+06	6.66909e+06	8549889	7.64397e+06	7.61033e+06	8.162e+06	8.67571e+06
2.47	1.46142e+07	1.21767e+07	1.8425e+07	1.49183e+07	1.83794e+07	1.77868e+07	1.33517e+07	1.86014e+07	1.4688e+07	1.1399e+07	1.70729e+07	1.10597e+07	1.22472e+07	1.57419e+07	1.44617e+07
2.45	2.59145e+07	2.04774e+07	3.51549e+07	2.73339e+07	3.42266e+07	3.46737e+07	2.35303e+07	3.44138e+07	2.59407e+07	2.0362e+07	3.26728e+07	1.88812e+07	2.05118e+07	2.82305e+07	2.56663e+07
2.43	3.80501e+07	3.06066e+07	5.26734e+07	3.9908e+07	4.23158e+07	5.07088e+07	3.4859e+07	3.70765e+07	3.82641e+07	3.29761e+07	4.79819e+07	3.21175e+07	2.89655e+07	3.52154e+07	4.1056e+07
2.41	1.74767e+07	1.47105e+07	2.22086e+07	1.7434e+07	1.77601e+07	2.09835e+07	1.57255e+07	1.69218e+07	1.76659e+07	1.61756e+07	2.22371e+07	1.65024e+07	1.4745e+07	1.52471e+07	1.87151e+07
2.39	1.81521e+07	1.49197e+07	4.61615e+07	2.35817e+07	3.16416e+07	3.47201e+07	2.25609e+07	4.58297e+07	2.87013e+07	2.12151e+07	3.94353e+07	1.82394e+07	2.53361e+07	2.8219e+07	2.39719e+07
2.37	1.54799e+07	1.55581e+07	1.63143e+07	1.55023e+07	1.91231e+07	1.52017e+07	1.59608e+07	2.27063e+07	1.80355e+07	1.3032e+07	1.79251e+07	1.37267e+07	1.76724e+07	1.86463e+07	1.57357e+07
2.35	4.34768e+07	4.35806e+07	4.70681e+07	4.84832e+07	8.11712e+07	4.2749e+07	5.25312e+07	9.87643e+07	6.43249e+07	3.89293e+07	5.03072e+07	3.85851e+07	5.38485e+07	7.06938e+07	4.50336e+07
2.33	5.63943e+07	5.89204e+07	6.72184e+07	6.15133e+07	9.66388e+07	6.43964e+07	70136680	1.14088e+08	8.70259e+07	5.71572e+07	6.89427e+07	5.63085e+07	8.24678e+07	9.29343e+07	6.06382e+07
2.31	1.93578e+07	1.67287e+07	2.12199e+07	1.9401e+07	2.51623e+07	2.10237e+07	2.08118e+07	2.8586e+07	2.42434e+07	1.86646e+07	2.40253e+07	1.83625e+07	2.63601e+07	2.51149e+07	1.8244e+07
2.29	1.63046e+07	1.50699e+07	1.82111e+07	1.63087e+07	1.91787e+07	1.7968e+07	1.75034e+07	2.25999e+07	2.01754e+07	1.60437e+07	1.91788e+07	1.53874e+07	2.10483e+07	2.03888e+07	1.58307e+07
2.27	1.7601e+07	1.70618e+07	2.11582e+07	1.8284e+07	2.38268e+07	2.15803e+07	2.01649e+07	3.14211e+07	2.5107e+07	1.84578e+07	2.17179e+07	1.68026e+07	2.57699e+07	2.63742e+07	1.76711e+07
2.25	1.46128e+07	1.39732e+07	1.8746e+07	1.55001e+07	1.85367e+07	1.96146e+07	1.69083e+07	2.51408e+07	2.02259e+07	1.5767e+07	1.99135e+07	1.4196e+07	2.39619e+07	2.24073e+07	1.49428e+07
2.23	1.24624e+07	1.22961e+07	1.57238e+07	1.28699e+07	1.38967e+07	1.64154e+07	1.47006e+07	1.84914e+07	1.65938e+07	1.35257e+07	1.60782e+07	1.22164e+07	2.21169e+07	1.86251e+07	1.30471e+07
2.21	1.01256e+07	9.7565e+06	1.24195e+07	1.00933e+07	1.06206e+07	1.22242e+07	1.0916e+07	1.26571e+07	1.24169e+07	1.052e+07	1.23133e+07	9.97127e+06	1.48316e+07	1.26726e+07	1.04353e+07
2.19	9.27333e+06	8.7145e+06	1.01822e+07	9.10428e+06	9.89585e+06	1.01157e+07	8.93105e+06	1.00377e+07	1.01662e+07	8.19743e+06	1.08129e+07	8.73272e+06	1.06164e+07	9.99308e+06	9.58332e+06
2.17	1.30894e+07	1.13685e+07	1.23326e+07	1.25725e+07	1.324e+07	1.31783e+07	1.14058e+07	1.14419e+07	1.27549e+07	1.02182e+07	1.30887e+07	1.17207e+07	1.16855e+07	1.22192e+07	1.35376e+07
2.15	2.11409e+07	1.7609e+07	2.59202e+07	2.14204e+07	2.52414e+07	2.58257e+07	1.91359e+07	2.64422e+07	2.08142e+07	1.63399e+07	2.49772e+07	1.58295e+07	1.86688e+07	2.33845e+07	2.06297e+07
2.13	4.24542e+07	3.85889e+07	6.08271e+07	4.78091e+07	7.15098e+07	6.09607e+07	4.52342e+07	8.15067e+07	5.47344e+07	3.78975e+07	5.63977e+07	3.39978e+07	4.38043e+07	6.09032e+07	4.29822e+07
2.11	2.77128e+07	2.68813e+07	3.56752e+07	3.13149e+07	5.19454e+07	3.44712e+07	3.20436e+07	6.63769e+07	4.22429e+07	2.58661e+07	3.65877e+07	2.49486e+07	3.38998e+07	4.59366e+07	2.79514e+07
2.09	1.93526e+07	1.87495e+07	2.21678e+07	2.0263e+07	2.71255e+07	2.07746e+07	2.01964e+07	3.2364e+07	2.44583e+07	1.78089e+07	2.34387e+07	1.80478e+07	2.27494e+07	2.57018e+07	1.97396e+07
2.07	2.67602e+07	2.46466e+07	2.96391e+07	2.86239e+07	3.62251e+07	2.76744e+07	2.6192e+07	4.04545e+07	2.99826e+07	2.35031e+07	2.88044e+07	2.31015e+07	2.9634e+07	3.23e+07	2.69488e+07
2.05	3.69101e+07	3.59414e+07	5.07263e+07	4.05213e+07	6.01943e+07	4.1208e+07	4.071e+07	8.20638e+07	4.95246e+07	3.45481e+07	6.39825e+07	3.31232e+07	4.97302e+07	6.01758e+07	3.68541e+07
2.03	3.02022e+07	2.86649e+07	3.70229e+07	3.16922e+07	4.23403e+07	3.39692e+07	3.1105e+07	5.02969e+07	3.66725e+07	2.80471e+07	3.88443e+07	2.72398e+07	3.71178e+07	3.98211e+07	3.03101e+07
2.01	3.14709e+07	2.86411e+07	3.68468e+07	3.31069e+07	4.18365e+07	3.53985e+07	3.11031e+07	4.6823e+07	3.55627e+07	2.88115e+07	3.57156e+07	2.72426e+07	4.00524e+07	3.98784e+07	3.05369e+07
1.99	2.97302e+07	2.72263e+07	3.39409e+07	3.15264e+07	4.22653e+07	3.30094e+07	3.0688e+07	4.95246e+07	3.69563e+07	2.79925e+07	3.18027e+07	2.58756e+07	4.05837e+07	4.11256e+07	2.82069e+07
1.97	2.36121e+07	2.19917e+07	2.6257e+07	2.40504e+07	3.07139e+07	2.55086e+07	2.4279e+07	3.64972e+07	3.05698e+07	2.28482e+07	2.49302e+07	2.12028e+07	3.04484e+07	3.07268e+07	2.23286e+07
1.95	2.0888e+07	1.8937e+07	2.02159e+07	1.95735e+07	2.11885e+07	2.03543e+07	1.94369e+07	2.55264e+07	2.48111e+07	1.91764e+07	2.00838e+07	1.78111e+07	2.08376e+07	2.15822e+07	1.93078e+07
1.93	2.57007e+07	24535384	3.09127e+07	2.62927e+07	2.8336e+07	3.59696e+07	2.66776e+07	4.3032e+07	3.25322e+07	2.43153e+07	3.15779e+07	2.3483e+07	2.85066e+07	3.52649e+07	2.63703e+07
1.91	3.86588e+07	3.92944e+07	5.82742e+07	4.51594e+07	5.1803e+07	6.90414e+07	4.67954e+07	8.39473e+07	56242465	4.00405e+07	5.91001e+07	4.04097e+07	5.155e+07	6.76538e+07	4.63895e+07
1.89	2.49176e+07	2.38071e+07	3.56909e+07	2.87492e+07	3.58436e+07	4.02367e+07	3.00307e+07	5.3588e+07	3.82448e+07	2.56999e+07	3.60452e+07	2.48652e+07	3.21956e+07	4.07509e+07	2.91514e+07
1.87	1.45662e+07	1.32684e+07	1.77604e+07	1.57918e+07	1.75597e+07	1.82768e+07	1.54121e+07	22125937	1.85664e+07	1.39909e+07	1.80549e+07	1.41167e+07	1.68206e+07	1.8685e+07	1.55929e+07
1.85	1.23807e+07	1.14739e+07	1.3344e+07	1.24191e+07	1.34102e+07	1.33237e+07	1.2746e+07	1.72062e+07	1.49581e+07	1.16681e+07	1.33682e+07	1.16206e+07	1.54743e+07	1.56433e+07	1.22145e+07
1.83	1.31585e+07	1.247e+07	1.34706e+07	1.2776e+07	1.42875e+07	1.41001e+07	1.40317e+07	2.00448e+07	1.6513e+07	1.27233e+07	1.36961e+07	12121758	1.85616e+07	1.82402e+07	1.26061e+07
1.81	1.73702e+07	1.60489e+07	1.37157e+07	1.99362e+07	1.869e+07	1.58415e+07	1.66061e+07	1.88252e+07	1.8449e+07	1.48958e+07	1.38644e+07	1.62125e+07	1.67737e+07	1.69188e+07	1.74651e+07
1.79	1.88572e+07	1.70542e+07	1.61688e+07	2.14465e+07	1.89479e+07	1.83561e+07	1.676e+07	1.62766e+07	1.81251e+07	1.58677e+07	1.64622e+07	1.85086e+07	1.51012e+07	1.61962e+07	20078130
1.77	3.25634e+07	3.09791e+07	4.625e+07	3.05604e+07	2.68579e+07	4.96814e+07	3.25337e+07	4.40123e+07	3.50034e+07	3.34958e+07	4.64529e+07	3.72621e+07	3.80203e+07	4.32385e+07	3.93513e+07
1.75	3.05905e+07	2.8632e+07	3.96151e+07	2.99577e+07	3.1616e+07	4.19761e+07	3.10809e+07	4.33856e+07	3.82525e+07	3.0677e+07	3.85729e+07	3.27581e+07	3.26601e+07	3.82047e+07	3.53874e+07
1.73	3.46897e+07	3.47421e+07	5.07525e+07	3.86377e+07	5.24909e+07	5.57899e+07	4.2806e+07	8.10211e+07	5.6703e+07	3.63906e+07	5.15079e+07	3.45867e+07	4.34842e+07	5.96326e+07	4.08808e+07
1.71	3.26231e+07	32906568	4.87198e+07	3.71525e+07	5.10927e+07	5.32113e+07	4.07716e+07	7.46567e+07	5.57088e+07	3.50086e+07	4.81473e+07	3.37471e+07	4.0673e+07	55045354	3.79816e+07
1.69	2.36263e+07	2.34942e+07	3.31885e+07	2.56684e+07	3.46687e+07	3.34461e+07	2.72658e+07	4.52599e+07	3.71733e+07	2.47077e+07	3.27654e+07	2.50313e+07	2.71855e+07	3.45192e+07	2.55741e+07
1.67	1.74338e+07	1.6869e+07	2.31378e+07	1.84371e+07	2.22261e+07	2.37777e+07	1.86364e+07	2.80507e+07	2.36641e+07	1.75449e+07	2.27907e+07	1.82752e+07	1.95585e+07	2.32453e+07	1.81555e+07
1.65	1.45203e+07	1.3905e+07	1.95932e+07	1.54745e+07	1.59277e+07	2.26775e+07	1.50892e+07	2.35223e+07	1.68288e+07	1.41558e+07	1.96492e+07	1.50068e+07	1.82332e+07	2.08959e+07	1.52461e+07
1.63	1.21237e+07	1.1599e+07	1.63608e+07	1.30353e+07	1.3089e+07	1.87112e+07	1.25442e+07	1.92245e+07	1.36184e+07	1.2068e+07	1.61473e+07	1.26686e+07	1.53728e+07	1.70747e+07	1.30243e+07
1.61	9.74449e+06	8.96632e+06	1.22372e+07	1.0274e+07	9.82361e+06	1.24314e+07	9.31138e+06	1.13172e+07	9.93667e+06	9.63721e+06	1.18639e+07	9.79365e+06	1.11909e+07	1.11297e+07	1.04934e+07
1.59	9.12966e+06	8.43576e+06	1.20623e+07	9.62949e+06	8.8099e+06	1.16241e+07	8.65944e+06	9.49731e+06	8.86543e+06	9.03063e+06	1.17626e+07	8.99738e+06	1.11355e+07	1.01021e+07	9.7342e+06
1.57	8.32366e+06	7.64697e+06	1.04111e+07	8.44701e+06	7.71286e+06	1.00913e+07	7.81851e+06	8.37062e+06	7.8996e+06	7.84028e+06	1.02244e+07	8.16058e+06	1.01905e+07	9.06544e+06	8.42506e+06
1.55	7.99664e+06	7.42086e+06	9.1413e+06	7.91022e+06	7.74201e+06	8.75839e+06	7.42376e+06	8.29065e+06	7.72225e+06	7.26708e+06	8.83732e+06	7.68746e+06	8.97187e+06	8.45338e+06	8.23044e+06
1.53	9.83816e+06	9.35836e+06	1.20588e+07	1.00068e+07	1.12821e+07	1.19448e+07	1.01785e+07	1.40126e+07	1.14684e+07	9.1831e+06	1.1667e+07	9.25963e+06	1.14374e+07	1.2358e+07	1.07e+07
1.51	1.3256e+07	1.28066e+07	1.87187e+07	1.43566e+07	1.8556e+07	1.91108e+07	1.58407e+07	2.65211e+07	1.91097e+07	1.33859e+07	1.81639e+07	1.23594e+07	1.6691e+07	2.04197e+07	1.53302e+07
1.49	1.33583e+07	1.31091e+07	1.88498e+07	1.44532e+07	1.87508e+07	1.89828e+07	1.57269e+07	2.64232e+07	1.94144e+07	1.37329e+07	1.83885e+07	1.27677e+07	1.67509e+07	1.99826e+07	1.55278e+07
1.47	1.7984e+07	1.93825e+07	2.69814e+07	2.07549e+07	3.51008e+07	2.47957e+07	2.35536e+07	7.77116e+07	2.50294e+07	1.88411e+07	2.43098e+07	1.72354e+07	2.29893e+07	3.33513e+07	2.1654e+07
1.45	1.85226e+07	1.86269e+07	2.596e+07	2.08919e+07	3.20325e+07	2.58095e+07	2.30441e+07	4.58665e+07	2.75723e+07	1.93018e+07	2.51844e+07	1.75695e+07	2.37625e+07	3.04519e+07	2.16299e+07
1.43	1.636e+07	1.59957e+07	2.253e+07	1.81122e+07	2.46306e+07	2.24134e+07	1.89724e+07	3.08788e+07	2.27476e+07	1.72434e+07	2.22828e+07	1.56422e+07	2.02529e+07	2.37879e+07	1.96142e+07
1.41	1.3486e+07	1.28545e+07	1.78211e+07	1.39789e+07	1.57021e+07	1.69592e+07	1.38697e+07	1.70335e+07	1.49319e+07	1.4543e+07	1.75194e+07	1.31685e+07	1.61044e+07	1.56896e+07	1.62507e+07
1.39	1.28071e+07	1.22416e+07	1.65591e+07	1.30124e+07	1.29237e+07	1.51745e+07	1.22714e+07	1.15247e+07	1.18772e+07	1.4326e+07	1.59094e+07	1.26806e+07	1.44607e+07	1.24798e+07	1.60504e+07
1.37	1.16904e+07	1.12992e+07	1.62847e+07	1.22156e+07	1.20108e+07	1.48345e+07	1.12584e+07	1.13168e+07	1.05784e+07	1.43238e+07	1.59834e+07	1.17598e+07	1.42049e+07	1.20233e+07	1.62293e+07
1.35	1.18972e+07	1.18355e+07	1.79662e+07	1.288e+07	1.30332e+07	1.6352e+07	1.16302e+07	1.28507e+07	1.0848e+07	15623742	1.83609e+07	1.18735e+07	1.6021e+07	1.33231e+07	1.77349e+07
1.33	2.88376e+07	2.91449e+07	4.16764e+07	3.2633e+07	4.88024e+07	3.97435e+07	3.57061e+07	6.50758e+07	3.90503e+07	3.44732e+07	4.65998e+07	2.71576e+07	4.61725e+07	4.85996e+07	3.708e+07
1.31	3.13581e+07	3.07391e+07	4.99776e+07	3.62856e+07	5.09011e+07	4.89556e+07	3.92367e+07	7.06801e+07	4.33676e+07	3.93667e+07	5.58158e+07	3.06864e+07	5.54163e+07	5.36954e+07	3.94637e+07
1.29	2.34612e+07	2.30457e+07	4.72918e+07	2.52136e+07	2.03948e+07	4.02467e+07	2.32246e+07	2.8107e+07	1.89259e+07	2.73858e+07	5.14841e+07	2.08739e+07	4.21608e+07	3.20813e+07	2.9664e+07
1.27	2.49343e+07	2.56558e+07	4.35811e+07	2.4484e+07	2.01341e+07	3.61203e+07	2.4264e+07	2.60899e+07	2.12021e+07	2.64693e+07	4.26958e+07	2.19701e+07	4.15539e+07	3.09633e+07	2.72196e+07
1.25	2.18478e+07	2.25482e+07	3.22849e+07	2.02874e+07	1.86616e+07	2.71324e+07	2.18583e+07	2.26852e+07	2.14069e+07	2.3351e+07	3.02871e+07	2.05409e+07	3.58689e+07	2.70087e+07	2.28792e+07
1.23	1.7656e+07	1.82908e+07	2.80154e+07	1.56245e+07	1.4273e+07	2.24826e+07	1.72871e+07	1.64323e+07	1.84792e+07	1.97682e+07	2.51464e+07	1.70835e+07	3.34459e+07	2.29161e+07	1.80161e+07
1.21	1.47705e+07	1.48773e+07	2.26699e+07	1.32303e+07	1.12372e+07	1.92871e+07	1.36312e+07	1.2868e+07	1.48215e+07	1.60946e+07	1.97593e+07	1.47024e+07	2.5806e+07	1.94245e+07	1.46016e+07
1.19	1.2109e+07	1.16048e+07	1.56916e+07	1.1205e+07	9.8872e+06	1.41178e+07	1.10211e+07	1.12655e+07	1.16244e+07	1.20332e+07	1.41581e+07	1.18556e+07	1.83255e+07	1.49919e+07	1.14816e+07
1.17	9.82137e+06	9.16787e+06	1.16675e+07	9.13433e+06	8.51099e+06	1.03133e+07	8.68132e+06	9.35166e+06	9.21517e+06	9.19117e+06	1.0465e+07	9.49002e+06	1.30139e+07	1.12532e+07	9.10374e+06
1.15	7.39974e+06	7.04422e+06	9.04973e+06	6.97125e+06	6.93934e+06	8.04067e+06	6.64354e+06	8.20638e+06	7.05832e+06	6.9801e+06	8.11979e+06	7.30637e+06	1.06136e+07	9.33687e+06	6.96325e+06
1.13	6.36877e+06	6.16241e+06	7.74467e+06	6.18488e+06	6.79462e+06	7.05953e+06	6.03115e+06	8.44726e+06	6.27309e+06	5.99115e+06	6.98925e+06	6.25992e+06	9.86659e+06	9.0033e+06	6.07275e+06
1.11	6.20948e+06	6.0176e+06	7.47301e+06	5.88544e+06	7.06732e+06	6.71841e+06	5.93395e+06	8.68167e+06	5.94623e+06	5.67845e+06	6.70637e+06	5.67343e+06	9.87088e+06	9.04378e+06	5.74251e+06
1.09	6.19536e+06	6.17379e+06	7.52444e+06	5.91049e+06	7.27824e+06	6.64751e+06	6.13764e+06	8.9837e+06	6.09803e+06	5777617	6.68548e+06	5.60393e+06	1.01281e+07	9.29186e+06	5.81628e+06
1.07	6.043e+06	6.16659e+06	7.62937e+06	5.71501e+06	7.1534e+06	6.84824e+06	5.95745e+06	9.71422e+06	6.43417e+06	5.60431e+06	7.12938e+06	5.58371e+06	1.00269e+07	9.40541e+06	5.92273e+06
1.05	1.53284e+07	1.45813e+07	1.90883e+07	1.55405e+07	2.2738e+07	2.00464e+07	1.58831e+07	3.08147e+07	2.03322e+07	1.35997e+07	20858258	1.41309e+07	2.09789e+07	2.48909e+07	1.64152e+07
1.03	3.19685e+07	3.29973e+07	4.20232e+07	3.31365e+07	5.71048e+07	4.28003e+07	3.68575e+07	7.62852e+07	5.47659e+07	3.18639e+07	4.00954e+07	3.05426e+07	4.18365e+07	5.39396e+07	3.13285e+07
1.01	1.83013e+07	1.92417e+07	2.34477e+07	1.87877e+07	3.022e+07	2.21097e+07	2.081e+07	4.04668e+07	3.03268e+07	1.84572e+07	2.35404e+07	1.7857e+07	2.26933e+07	2.80878e+07	1.86807e+07
0.99	3.24196e+07	3.37966e+07	4.3201e+07	3.33302e+07	5.72697e+07	4.15496e+07	3.72864e+07	7.92137e+07	5.48384e+07	3.20782e+07	4.24208e+07	3.04781e+07	4.18945e+07	5.44535e+07	3.2393e+07
0.97	3.81878e+07	4.04305e+07	5.2662e+07	3.9527e+07	6.69759e+07	5.16242e+07	4.55638e+07	9.09319e+07	6.75674e+07	3.95585e+07	5.1132e+07	38113345	4.69786e+07	6.2786e+07	3.86285e+07
0.95	6.4807e+07	7.03067e+07	9.16909e+07	6.80584e+07	1.18005e+08	8.86413e+07	8.10019e+07	1.60087e+08	1.26955e+08	7.0487e+07	8.76361e+07	7.02035e+07	7.2642e+07	1.05293e+08	6.74147e+07
0.93	39208473	3.77725e+07	4.57134e+07	3.90684e+07	5.21641e+07	4.33666e+07	4.08325e+07	5.95363e+07	5.3603e+07	3.77246e+07	4.40537e+07	3.71175e+07	4.01526e+07	4.47206e+07	3.76581e+07
0.91	2.3458e+07	2.21143e+07	2.8357e+07	2.25494e+07	2.39909e+07	2.60189e+07	2.2075e+07	2.60068e+07	2.54146e+07	2.23941e+07	2.79284e+07	2.18171e+07	2.48004e+07	2.38373e+07	2.2334e+07
0.89	2.32324e+07	2.20084e+07	3.11033e+07	2.12364e+07	1.80623e+07	2.76707e+07	2.07224e+07	1.95004e+07	1.96753e+07	2.08062e+07	3.00527e+07	2.01125e+07	2.67185e+07	2.26181e+07	2.17198e+07
0.87	2.32674e+07	2.24137e+07	2.98554e+07	2.03547e+07	1.6385e+07	2.57678e+07	2.03639e+07	1.6552e+07	1.91299e+07	2.0618e+07	2.63243e+07	2.04456e+07	2.45061e+07	2.06609e+07	2.07208e+07
0.85	1.74351e+07	1.69893e+07	2.24642e+07	1.4897e+07	1.18436e+07	1.91101e+07	1.54033e+07	1.23901e+07	1.46343e+07	1.61309e+07	1.99885e+07	1.59853e+07	2.10832e+07	1.66927e+07	1.55277e+07
0.83	1.26007e+07	1.26461e+07	1.82376e+07	1.05518e+07	8.79019e+06	1.57998e+07	1.1384e+07	1.03379e+07	1.16379e+07	1.27212e+07	1.58803e+07	1.23448e+07	1.993e+07	1.51785e+07	1.13842e+07
0.81	9.25743e+06	9.22941e+06	1.30242e+07	8.00387e+06	6.95839e+06	1.17183e+07	8.32019e+06	9.07187e+06	8.85312e+06	9.58961e+06	1.13786e+07	9.67721e+06	1.55836e+07	1.25941e+07	8.52024e+06
0.79	7.28342e+06	7.10443e+06	9.50288e+06	6.54385e+06	5.92593e+06	8.60555e+06	6.45559e+06	7.81397e+06	6.66967e+06	7.20896e+06	8.36503e+06	7.6029e+06	1.13203e+07	9.43397e+06	6.75664e+06
0.77	6.14701e+06	5.87893e+06	7.67746e+06	5.5295e+06	5.28162e+06	7.07762e+06	5.38039e+06	6.81633e+06	5.49756e+06	5.84932e+06	6.7513e+06	6.3601e+06	9.00313e+06	7.8673e+06	5.66444e+06
0.75	5.30689e+06	5.02607e+06	6.62678e+06	4.84115e+06	4.66358e+06	6.19248e+06	4.60203e+06	6.17161e+06	4.7382e+06	4.98854e+06	5.84882e+06	5.54494e+06	7.90469e+06	6.96914e+06	4.81156e+06
0.73	4.63694e+06	4.47109e+06	5.79357e+06	4.26191e+06	4.31901e+06	5.4717e+06	4.06501e+06	5.99999e+06	4.17048e+06	4.3645e+06	5.06254e+06	4.82961e+06	7.35973e+06	6.57405e+06	4.24619e+06
0.71	4.20557e+06	4.08346e+06	5.3841e+06	3.83981e+06	4.31291e+06	5.06265e+06	3.6577e+06	6359896	3.76227e+06	3.9437e+06	4.57818e+06	4.33908e+06	7.4213e+06	6.77807e+06	3.74541e+06
0.69	3.72573e+06	3.67046e+06	4.91265e+06	3.39433e+06	4.00896e+06	4.55061e+06	3.21506e+06	5.5329e+06	3.31962e+06	3.49375e+06	4.10303e+06	3.93464e+06	6.66945e+06	6.21568e+06	3.33584e+06
0.67	3.2973e+06	3.14151e+06	4.2769e+06	3.04751e+06	3.30582e+06	3.9787e+06	2.857e+06	4.30662e+06	3.00076e+06	3.10394e+06	3.57229e+06	3.52081e+06	5.37609e+06	4885120	2.97986e+06
0.65	3.01489e+06	2.82489e+06	3.70832e+06	2.69875e+06	2.77023e+06	3.49181e+06	2.51775e+06	3.65045e+06	2.56606e+06	2.76336e+06	3.05793e+06	3.09726e+06	4.57176e+06	4.10326e+06	2.60546e+06
0.63	2684656	2.54987e+06	3.3604e+06	2.43564e+06	2.53936e+06	3.15679e+06	2.2947e+06	3.31042e+06	2.34114e+06	2.51493e+06	2.76336e+06	2.8488e+06	4.08363e+06	3.70144e+06	2.33165e+06
0.61	2.44042e+06	2.3349e+06	3.03623e+06	2.17776e+06	2.2776e+06	2.92851e+06	2.13182e+06	2.98811e+06	2.10912e+06	2.25668e+06	2.51953e+06	2.58471e+06	3.74361e+06	3.34049e+06	2.12498e+06
0.59	2.32847e+06	2.13136e+06	2.84272e+06	2.03992e+06	2.12511e+06	2.67911e+06	1.9671e+06	2.79453e+06	2.00402e+06	2.13802e+06	2.29405e+06	2.47331e+06	3.48822e+06	3.16687e+06	1.98424e+06
0.57	2.02977e+06	1.93063e+06	2.54217e+06	1.87834e+06	1.91691e+06	2.46713e+06	1.71263e+06	2.5713e+06	1.77964e+06	1.95266e+06	1.97276e+06	2.16921e+06	3.15665e+06	2.80329e+06	1.73788e+06
0.55	1.88367e+06	1.77081e+06	2.32063e+06	1.69606e+06	1.75224e+06	2.09373e+06	1.48219e+06	2.28214e+06	1.56654e+06	1.71444e+06	1.79363e+06	2.00557e+06	2.89399e+06	2.56064e+06	1.57081e+06
0.53	1.75668e+06	1.67224e+06	2.09947e+06	1.48299e+06	1.61585e+06	2.05221e+06	1.32147e+06	2.1312e+06	1.39502e+06	1.64249e+06	1.63207e+06	1.82362e+06	2.67364e+06	2.42296e+06	1.42135e+06
0.51	1.62319e+06	1.49515e+06	1.95754e+06	1.41864e+06	1.54501e+06	1.89356e+06	1.28841e+06	1.99071e+06	1.29599e+06	1.49949e+06	1.4791e+06	1.70887e+06	2.45316e+06	2.25157e+06	1.31689e+06

## Sheet: ver3
Bin (ppm)		9.99	9.97	9.95	9.93	9.91	9.89	9.87	9.85	9.83	9.81	9.79	9.77	9.75	9.73	9.71	9.69	9.67	9.65	9.63	9.61	9.59	9.57	9.55	9.53	9.51	9.49	9.47	9.45	9.43	9.41	9.39	9.37	9.35	9.33	9.31	9.29	9.27	9.25	9.23	9.21	9.19	9.17	9.15	9.13	9.11	9.09	9.07	9.05
Cannibal	1	86924.6	-7680.81	69122.8	51578.5	82218.8	70534.5	62558.1	55449.5	35930.3	40494.7	49148.3	56112.9	54301.9	81996.1	98500.9	61831.9	88811.9	105263	81893.8	129659	155003	138776	91568.4	91438.8	107284	108624	148544	128776	205561	113996	162342	175796	152935	173498	143264	199677	171408	165618	137501	163429	138923	141649	129718	190730	146639	216774	186739	182902
	2	28799.8	126061	118608	112243	91587.1	65583.5	91923.6	116310	126977	79272.6	122993	106011	61946.9	103138	103377	113241	100177	147437	106136	129638	193184	144169	153887	114966	164372	131261	120132	135713	146879	105098	161132	182402	183512	189859	206863	125311	149407	198942	139885	224941	205454	222508	213239	186871	169978	178267	250055	169371
	3	35846.6	52525.9	35446.8	73725.2	44084.3	54251.1	77630.9	48359.7	38793.9	49379.2	80394.9	31428.4	45248	28207.1	43153.5	101152	73418.9	67997.5	94947	121055	193449	61056.1	30883.4	144005	78876.2	102967	145775	111451	71214.7	168074	191244	114994	160010	234569	148169	152503	122509	187130	217405	132595	167373	140620	146494	164759	144622	189079	188913	135616
	4	34700.5	65140.9	20099.5	53667.2	43366.9	39854.2	58722.8	69525.7	14121.1	49557.6	27341.9	90958.2	110661	71701.6	55695.6	50980.5	76696.9	42313.2	107029	80727.5	198648	81895.3	72614	74127.8	78138.9	122680	70413.8	72068	118136	121101	183416	136340	183767	198523	157751	190874	123895	194468	178283	109688	171754	182792	142343	191339	140667	138811	194696	136380
	5	34517.2	35547.8	16796.6	15587	37579.2	18990.2	6886.83	32337.7	16417.4	44960.7	-30632.1	5331.8	69089.3	16380.9	35774	77395.9	40969.2	58272.2	55885.7	62243.5	89275.7	76798.9	61375.7	15938.9	86446.5	36795.4	110505	68010.2	48505.1	53812.2	73650.4	109454	144215	108823	110505	96180.5	80882.9	140330	66153.7	116108	117994	72765.3	97344.4	111516	90582.5	101171	124264	103736
	6	90211.5	106515	111066	66925.6	32533.9	56043.6	85446.6	105123	110924	108183	87264.5	60013.8	80939.1	96128.4	88757.4	115963	112065	114502	94595.9	89631.4	192300	122024	135240	129174	131760	119342	139110	149597	127965	179593	207326	166996	154395	161348	133749	181470	119396	129826	201717	151033	128820	169977	190941	155647	158986	166821	176852	182154
	7	40092.5	-7759.2	33088.7	-4355.65	24679.8	21512.5	62125.1	-370.8	7996.86	36406.1	21789.2	1442.85	5210.39	21746.8	56252.5	2326.99	59761.8	40566.1	78359	56734.6	76968.3	53415.8	60228.7	62220.9	97436.4	63338.8	73272.4	64382	66165.1	137860	121645	89939.3	121011	146602	115911	147621	135730	100040	97741.8	75849.1	137105	159963	141455	147271	98163.4	130046	64555.2	153823
	8	-5756.15	69115	42189.8	15479	15512	58212	13982.2	117373	84974	-743.72	52831	18735	24561.2	54650.6	47484.7	4848.01	66627.8	49176.2	16862.8	110210	90815.8	33656.6	77855.5	93225.4	69322.1	130457	23307.9	48574.3	155077	132897	85090.9	129601	90569	159719	99852	118652	106350	56416.7	120750	101098	162797	58374.3	90279.4	92661.5	96884.1	143982	113376	131701
	9	57778.5	11894.6	25360.9	73642.8	49052.6	63658.9	9914.9	56295.9	45163.7	32942.9	35433.3	74445.3	23207.9	51337.5	83666.7	82687	44762.4	49276	108056	58982.8	107918	91888.1	81749.8	77510.6	108428	107618	120189	120484	72716.8	108312	116768	93454.9	170950	166054	115440	139358	112809	186039	161541	117146	135009	113281	129860	158037	154680	146197	141477	136120
	10	72508.9	56188.3	103634	69068.9	78064.4	114898	89182.1	47545.2	76600	115176	70703.9	96146.3	126068	122882	70985.8	137094	108981	110137	103072	130402	158823	92367.7	145914	111552	97505.8	181303	128621	120908	178038	113354	153020	154380	204994	192746	164602	151982	158364	175405	218240	169561	162081	191921	181416	212003	177457	187951	201811	154590
	11	57345.2	51061.1	58649.8	72605	105857	15931.8	51594.6	66154	52942.1	25143.9	20726.9	62137	68973.8	69861.1	12993.4	103738	53628.2	27537.8	114581	91633.9	206244	98823.3	61755.1	127553	92605.8	87899.4	110025	122456	107839	138360	140742	127411	195637	213789	116186	202030	148634	170972	186256	179524	143288	178895	158382	141543	153074	191318	199401	143753
	12	50258	23913.2	1781.1	-49469.6	59086.8	5255.19	-6323.31	-1568.74	52223.7	57411.8	49455	63427.8	16193	55953.2	70622.9	23982.7	40859.1	83696.4	34134.5	44509.1	90877.6	93069.7	34532.5	57064.3	58433.9	123496	37696.4	41430.5	106653	113423	152246	99985.9	109870	174596	35207.8	108350	145997	78049.6	118066	91158.4	98985.2	141333	83758.6	139340	125970	155920	121238	100303
	13	17303.8	69133.4	50084.2	33600.7	97405.9	67832.9	26016	30805	489.61	130511	63208	38758.3	80174.7	57025.4	68712.8	77687.8	52414.1	72681.2	86981.6	90105.1	163456	79149.9	87081.5	56418.5	88705.9	86367.4	121734	102282	138121	104368	131708	123918	186219	139120	93568.6	126144	136594	148201	167107	105755	168186	142643	146188	144656	99184.6	140884	176748	126900
	14	57591	53884.8	96616.9	83595.7	55396.3	109810	49670.4	83332.9	69871.3	74193	75560.6	25159.5	88197.4	111034	85815	95451.1	81050.9	107509	108886	90527.2	110525	49599	98855.5	129596	130269	129969	151506	92894.6	141387	93974.9	149774	133554	125476	190444	138001	180917	125207	118265	177566	150864	210900	133333	170482	158782	147401	183450	188235	140156
	15	27411.1	92841.6	79354.1	27967.6	118016	65656.5	81023.6	83721.1	90730.4	101107	86391.5	121198	73745.1	95841.8	66979.8	61750.8	96722.2	118769	161838	104298	208950	134752	63404.4	116516	146771	130629	111092	156751	132807	147249	249399	125104	201782	201050	182449	183202	132949	174335	215901	197019	222501	174226	213320	205439	234363	209601	253574	164741
Herbivore	1	1.04481e+06	1.09364e+06	1.01949e+06	1.03519e+06	1.09316e+06	1.09365e+06	1.09051e+06	1.10231e+06	1.07974e+06	1.1265e+06	1.12585e+06	1.09959e+06	1.13022e+06	1.11072e+06	1.12036e+06	1.14737e+06	1.09221e+06	1.1203e+06	1.18521e+06	1.17236e+06	1.30134e+06	1.16089e+06	1.15365e+06	1.15696e+06	1.16799e+06	1.1886e+06	1.24268e+06	1.17981e+06	1.25661e+06	1.21062e+06	1.31027e+06	1.25882e+06	1.30621e+06	1.30294e+06	1.31206e+06	1.29858e+06	1.27944e+06	1.31895e+06	1.32506e+06	1.29383e+06	1.32509e+06	1.31547e+06	1.29312e+06	1.53265e+06	1.35896e+06	1.33633e+06	1.32031e+06	1.32048e+06
	2	1.56192e+06	1.66175e+06	1.61094e+06	1.6584e+06	1.62778e+06	1.63084e+06	1.69344e+06	1.6055e+06	1.61894e+06	1.69306e+06	1.69885e+06	1.65358e+06	1.69514e+06	1.62771e+06	1.6682e+06	1.68851e+06	1.70708e+06	1.6834e+06	1.73713e+06	1.74312e+06	1.86995e+06	1.7365e+06	1.72253e+06	1717041	1.77309e+06	1.74252e+06	1752002	1.78417e+06	1.83805e+06	1.83094e+06	1.89816e+06	1.84551e+06	1.86494e+06	1.81289e+06	1.84869e+06	1.83246e+06	1.8376e+06	1.93706e+06	1.86857e+06	1.84232e+06	1.84921e+06	1.87811e+06	1.89103e+06	2.02716e+06	1.91325e+06	1.87328e+06	1.91763e+06	1.92343e+06
	3	14835	40782.7	-32454.8	9198.47	-11968.1	53458	13066.7	49649	-40226.3	21664.6	26976.9	-33901.1	18684	14524.5	4930.96	47015.1	40984.1	36706.8	61270.5	31946.5	199647	24636.5	59191.6	47088.7	90557.8	71524.2	77732.3	119649	108631	113683	265021	179715	210285	274860	145834	145109	152282	215758	208031	197763	150422	199878	194137	273298	216248	201937	243181	180866
	4	22163.8	96885.4	68854	1244.85	45078	78469.9	47321.7	63820.2	68775.4	18912.3	61124.3	82524.8	62377.2	45609.7	102038	71190.8	68223.4	106471	95380.1	95358.4	233494	135042	118584	66899.2	139500	109027	140304	73467.6	155796	120907	185198	189639	236220	227224	157119	156781	153979	218194	227744	215184	204649	211400	226239	424454	272000	216265	181126	204164
	5	-90210.5	-84520.5	-45996.7	-96537.7	-51638.9	-76787.9	-105698	-28897.6	-75442.7	-82009.6	-53729.5	-60450	-11761.2	-44507.9	-53826.3	-54295.3	-2850.12	-82225.5	-26887.4	-57137.3	-13249.7	43227.9	-31087.4	-2651	-49596.9	-5289.93	29153.8	-8556.84	-18171.3	50691.2	-31412.9	-12863.8	17692.8	26743.7	44528	51282	46865.4	104132	47008.9	32009.1	70879.6	93605.8	85231.7	245231	157144	58882.8	78261.3	54461.8
	6	17502.2	27029.7	15937.2	-23713	2521.77	27087.3	17842.2	8011.15	8313.91	18237.4	-11164.5	47600.8	25458.7	-10246.6	16094.6	29153.2	48693	35354.2	51728.8	78991.6	164572	118212	95480.7	47005.4	80415	143126	76140.2	136260	86350.2	170174	243256	113670	166412	207513	183496	115653	149959	211578	193979	205267	220267	175038	184709	247302	235367	220290	225486	201615
	7	89938	42423.1	72327.8	115837	40971.8	64933.1	81530.9	74607.3	77513.2	91058.9	136706	60723.2	32889.5	117491	103478	145436	131768	122360	155214	154090	260002	129640	140896	130466	198771	173525	127142	173587	182485	151565	200330	151461	251040	272125	232312	256898	196825	197753	260449	250010	212270	261164	285784	388133	263751	184017	244781	229551
	8	-137046	-81018.5	-74820.1	-62068.9	-77346.8	-64508.3	-88285.8	-69868.9	-115888	-74203.1	-85367.5	-100507	-131121	-91779.5	-46543	-62215.1	-64724.2	-46511	-64155.4	-3211.28	-4376.97	-4290.14	-47792.2	-75462.8	-29192.5	-42392.2	12926	-3894.63	-30153.8	12882.5	22026.2	104597	20984.8	17087.9	35701.3	17741.8	36955.1	20580.3	44821.2	38735.2	88630.1	85128.2	93343.3	106891	40954.3	68656.6	96471.9	91318.7
	9	112863	38892	53089.2	83480	79099.3	86286.2	116289	93874.6	91415.7	51530.1	62721.8	124389	110629	156449	107305	57344.6	111883	164180	186504	175170	183320	148982	174295	184740	152572	192048	228130	144386	170685	150179	191328	248022	187245	242566	188531	224583	184443	200537	247520	244593	237721	264028	290590	353694	375166	226956	271779	259480
	10	49301	13108.9	18275.6	22310.8	14790.8	35368	-11856.7	19957.3	40942.2	68100.9	20752.4	65190	47937.2	62068.6	34482.4	19803.2	30276.4	31632.3	48104.6	113246	113585	79620	95636.5	94147.2	87140.5	79901.7	79368.1	88408.7	87398.7	111319	99436.3	130404	118053	157734	126970	123891	112326	158226	156816	159833	144250	176825	112151	235631	208480	180244	160189	151149
	11	134312	115354	149289	132838	142418	141889	159601	124304	116109	168618	188228	145563	150674	165729	190393	169754	193542	203118	207522	238522	298386	261799	237513	219965	196299	238734	269210	296885	292374	261729	381681	323393	326041	399411	313739	340483	298451	356503	356632	326109	327459	364678	300251	400379	386733	394238	410099	360939
	12	18952.3	34800.5	-3802.47	-24146.4	-16411	-24738.6	39786	48489.9	21716.2	2249.06	10176.5	-115.8	31614.2	-2623.7	-811.75	-18877.2	19266.6	77825.4	22175.7	28061.4	184623	5796.18	30500	51307.2	64273.7	70500.4	29832.6	112054	82754.4	104546	150352	112021	150401	161658	99044.7	109603	76674.1	99937.7	105586	168994	111059	159593	99159.8	332526	209189	177813	122435	139631
	13	-49017.4	-52711.7	-27218.9	-112677	-79450.1	-21015	-5527.01	-30781.5	-2637.15	-51948.9	-42180.2	-76952	-24931.1	-41433.6	-21371.3	-26967.7	15100.4	-7537.7	-26257	5098.58	133065	16437.8	-8350.29	14350.1	30338.1	8981.06	34529.5	39099	23119.7	69266.6	42400.8	85019.5	103807	176619	111337	85623.4	104758	142387	117973	100381	134407	95375.1	151386	162778	128588	125298	120835	126711
	14	-52851.8	-75646.8	-51441.1	-38393	-76330.4	-90699.7	-55208.7	-45840.7	-89961.1	-104797	-79520.5	-61412	-38777.2	-70112	-74591.1	-25071	-25867.1	-19163.6	-54423.9	22628.5	55928.2	52097	-43033.9	-56563	-74329.1	15617.8	1321.11	9190.8	-30683.7	30385.2	101609	49396.3	71858.2	71698.9	46424.3	90193.3	47286.3	98525.3	27412	46046.3	61314	65745.1	65216	131899	105373	88905.9	97270.3	128786
	15	58746.3	118616	83305.4	93708.9	114498	78570	117500	99001.8	141065	85237.4	147699	108040	157015	132470	159248	136407	124827	115020	116684	112572	235223	150013	140681	179264	168120	203294	153023	167359	203922	162575	332839	238601	284698	369110	195025	225261	235074	293792	301699	263346	248259	272992	287748	337628	368108	271003	267551	298320
[truncated: 407 more columns]
